# Supplementary material for: Dearomative bis-functionalization of quinoxalines and bis-N-arylation of (benz)imidazoles via Cu(ii)-mediated addition of boronic acids
Source: Royal Society of Chemistry journal article supplement (doi:10.1039/d2cc06399a), 2023-01-01
Supplement: d2cc06399a1.pdf [file d2cc06399a1.pdf]

## Supporting Information

### Dearomative *bis*-functionalization of quinoxalines and *bis*-*N*-arylation of (benz)imidazoles via Cu(II) mediated addition of boronic acids

Tamanna Khandelia, Subhendu Ghosh, and Bhisma K. Patel\*

Department of Chemistry, Indian Institute of Technology Guwahati, Assam, India.

E-mail: [patel@iitg.ac.in](mailto:patel@iitg.ac.in)

#### Contents:

|                                                                |            |
|----------------------------------------------------------------|------------|
| 1. General Information and Instrumentation:                    | S2         |
| 2. Representative Hydroxy Group Containing Bio-Pharmaceuticals | S2         |
| 3. Optimisation of Reaction Conditions                         | S2 - S4    |
| 4. General Procedure for the Synthesis of <b>3aa</b>           | S4         |
| 5. General Procedure for the Synthesis of <b>7'</b>            | S4-S5      |
| 6. General Procedure for the Synthesis of <b>8'</b>            | S5         |
| 7. General Procedure for the Synthesis of <b>10</b>            | S5         |
| 8. General Procedure for the Synthesis of <b>11</b>            | S6         |
| 9. General Procedure for the Synthesis of <b>12</b>            | S6         |
| 10. Mechanistic Studies                                        | S7 - S11   |
| 11. Crystallographic Description                               | S12 - S15  |
| 12. Plausible Mechanism for the Formation of <b>10</b>         | S15        |
| 13. Post-synthetic Modifications                               | S16        |
| 14. References                                                 | S16        |
| 15. DFT Calculation                                            | S16 - S24  |
| 16. Spectral Data                                              | S24 - S38  |
| 17. NMR Spectra                                                | S39 - S126 |

## 1. General Information and Instrumentation:

All chemicals were obtained from commercial sources and were used without further purification. The starting material **1** was synthesized according to previously described methods.<sup>1</sup> Reactions were monitored via TLC, prepared using silica gel 60 F<sub>254</sub> (0.25 mm), and were detected under UV light at 254 nm. For chromatography, separation was carried out using 60–120 mesh-sized silica gel. Ethyl acetate/ hexane and methanol/ DCM mixtures were used as the eluent. <sup>1</sup>H, <sup>13</sup>C, and <sup>19</sup>F NMR spectra were recorded in 600, 500, and 400 MHz NMR in deuterated solvents, and the chemical shifts ( $\delta$ ) are given in ppm. The <sup>1</sup>H spectra were referenced to TMS (0 ppm) for CDCl<sub>3</sub> and H<sub>2</sub>O in DMSO-d<sub>6</sub> (3.3 ppm) for DMSO-d<sub>6</sub>; for <sup>13</sup>C CDCl<sub>3</sub> (77.16 ppm) and for DMSO-d<sub>6</sub> (39.5 ppm). IR spectra were recorded neat using an FT-IR spectrometer. HRMS was recorded using ESI (Q-TOF type mass analyzer) in positive modes.

## 2. Representative Hydroxy Group Containing Bio-Pharmaceuticals<sup>2</sup>:

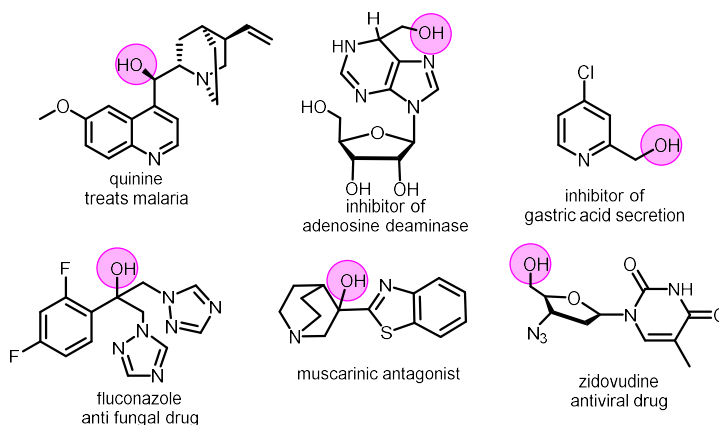

Figure S1: Hydroxy Group Containing Bio-Pharmaceuticals

## 3. Optimisation of Reaction Conditions

After confirming the structure of **3aa** (by <sup>1</sup>H, <sup>13</sup>C NMR, and X-ray crystallographic techniques) and to arrive at the optimal reaction conditions, various reaction parameters were tuned keeping **1a** and **2a** as the model coupling partners. At first a series of copper salts *viz.* CuF<sub>2</sub>, CuCl<sub>2</sub>, Cu(acac)<sub>2</sub>, CuBr<sub>2</sub>, and Cu(OAc)<sub>2</sub> were screened, but none could enhance the yield of **3aa** (Table S1, entries 2-6). A sequential enhancement in Cu(OTf)<sub>2</sub> loading from 0.2 to 1.2 equiv, improved the yield of **3aa** from 21% to 84% (Table S1, entries 7-9). However, a further enhancement in Cu(OTf)<sub>2</sub> loading to 1.5 and 2 equivalents did not improve the yield of **3aa**

significantly (Table S1, entry 10-11). The use of other solvents *viz.* *o*-xylene, *m*-xylene, 1,2-dichloroethane (DCE), chlorobenzene, 1,2-dichlorobenzene (DCB), tetrahydrofuran (THF), 2,2,2-trifluoroethanol (TFE), and DMSO were all found inferior to toluene (Table S1, entries 12-19). A control reaction in the absence of Cu(OTf)<sub>2</sub> yielded no trace of **3aa**, suggesting the crucial role of Cu(OTf)<sub>2</sub> in this protocol (Table S1, entry 20). Further, the reaction performed at a higher temperature (100 °C) failed to improve the yield (Table S1, entry 21), while there was no reaction at room temperature (Table S1, entry 22). No noticeable enhancement in the yield was observed by prolonging the reaction time to 20 h (Table S1, entry 23).

**Table S1 Optimization of reaction conditions<sup>a</sup>**

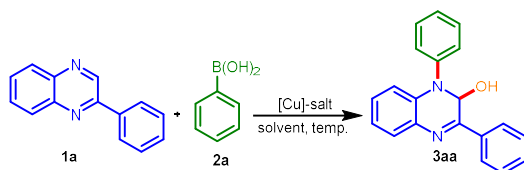

| Entry           | Cu salt (equiv)                  | Solvent          | Yield of <b>3aa</b> (%) <sup>b</sup> |
|-----------------|----------------------------------|------------------|--------------------------------------|
| 1               | Cu(OTf) <sub>2</sub> (0.2)       | Toluene          | 21                                   |
| 2               | CuF <sub>2</sub> (0.2)           | Toluene          | 13                                   |
| 3               | CuCl <sub>2</sub> (0.2)          | Toluene          | nd                                   |
| 4               | Cu(acac) <sub>2</sub> (0.2)      | Toluene          | nd                                   |
| 5               | CuBr <sub>2</sub> (0.2)          | Toluene          | nd                                   |
| 6               | Cu(OAc) <sub>2</sub> (0.2)       | Toluene          | nd                                   |
| 7               | Cu(OTf) <sub>2</sub> (0.5)       | Toluene          | 35                                   |
| 8               | Cu(OTf) <sub>2</sub> (1.0)       | Toluene          | 77                                   |
| <b>9</b>        | <b>Cu(OTf)<sub>2</sub> (1.2)</b> | <b>Toluene</b>   | <b>84</b>                            |
| 10              | Cu(OTf) <sub>2</sub> (1.5)       | Toluene          | 86                                   |
| 11              | Cu(OTf) <sub>2</sub> (2)         | Toluene          | 87                                   |
| 12              | Cu(OTf) <sub>2</sub> (1.2)       | <i>o</i> -Xylene | 71                                   |
| 13              | Cu(OTf) <sub>2</sub> (1.2)       | <i>m</i> -Xylene | 70                                   |
| 14              | Cu(OTf) <sub>2</sub> (1.2)       | 1,2-DCE          | 57                                   |
| 15              | Cu(OTf) <sub>2</sub> (1.2)       | PhCl             | 61                                   |
| 16              | Cu(OTf) <sub>2</sub> (1.2)       | 1,2-DCB          | 64                                   |
| 17              | Cu(OTf) <sub>2</sub> (1.2)       | THF              | nd                                   |
| 18              | Cu(OTf) <sub>2</sub> (1.2)       | TFE              | nd                                   |
| 19              | Cu(OTf) <sub>2</sub> (1.2)       | DMSO             | nd                                   |
| 20              | --                               | Toluene          | nd                                   |
| 21 <sup>c</sup> | Cu(OTf) <sub>2</sub> (1.2)       | Toluene          | 84                                   |
| 22 <sup>d</sup> | Cu(OTf) <sub>2</sub> (1.2)       | Toluene          | nd                                   |
| 23 <sup>e</sup> | Cu(OTf) <sub>2</sub> (1.2)       | Toluene          | 85                                   |

<sup>a</sup>Reaction Conditions: **1a** (0.35 mmol), **2a** (0.56 mmol), copper salt, solvent (1.5 mL), 90 °C, 15h. <sup>b</sup>Isolated yield. <sup>c</sup>Reaction carried out at 100 °C. <sup>d</sup>Reaction carried out at rt. <sup>e</sup>20 h. nd = not detected.

#### 4. General Procedure for the Synthesis of **3aa**

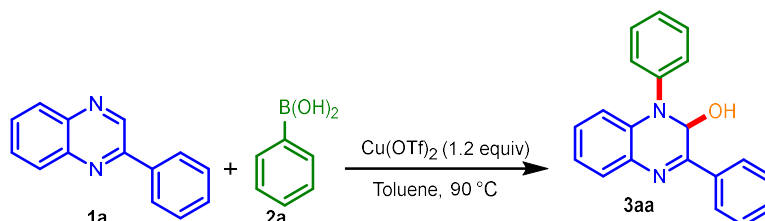

An oven-dried 5 mL round-bottom flask was charged with 2-phenylquinoxaline (**1a**) (0.35 mmol, 72 mg), phenylboronic acid **2a** (0.56 mmol, 68 mg),  $\text{Cu}(\text{OTf})_2$  (1.2 equiv, 0.42 mmol, 152 mg), a magnetic stir bar in toluene (1.5 mL) and was heated at 90 °C for 15 h. The progress of the reaction was monitored via TLC. After completion of the reaction, the solvent was removed by rotary evaporation. The reaction mixture was then mixed with water (10 mL) and extracted with ethyl acetate ( $2 \times 15$  mL). The organic layer was dried over anhydrous sodium sulfate and was evaporated under reduced pressure. The residue so obtained was purified over column chromatography by eluting with hexane: ethyl acetate (96:4) mixture to afford the desired product **3aa** as yellow solids in 84% yields (88 mg).

#### 5. General Procedure for the Synthesis of **7'**

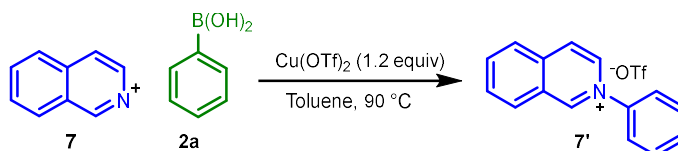

An oven-dried 5 mL round-bottom flask was charged with isoquinoline (**7**) (0.35 mmol, 45 mg), phenylboronic acid **2a** (0.88 mmol, 68 mg),  $\text{Cu}(\text{OTf})_2$  (1.2 equiv, 0.42 mmol, 152 mg), and a magnetic stir bar in toluene (1.5 mL) and was heated at 90 °C for 15 h. The progress of the reaction was monitored via TLC. After completion of the reaction, the solvent was removed by rotary evaporation. The reaction mixture was then purified over column chromatography by

eluting with DCM: Methanol (95: 5) mixtures to afford the product **7'** as brown gummy solid in 81% yield.

## 6. General Procedure for the Synthesis of **8'**

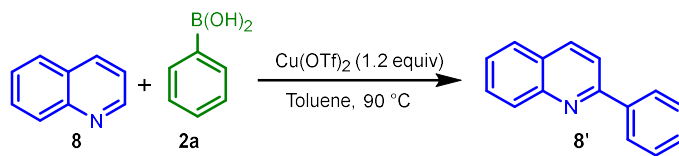

An oven-dried 5 mL round-bottom flask was charged with quinoline (**8**) (1.05 mmol, 135 mg), phenylboronic acid **2a** (0.56 mmol, 68 mg),  $\text{Cu(OTf)}_2$  (1.2 equiv, 0.42 mmol, 152 mg), and a magnetic stir bar in toluene (1.5 mL) and was heated at  $90^\circ\text{C}$  for 15 h. The progress of the reaction was monitored via TLC. After completion of the reaction, the solvent was removed by rotary evaporation. The reaction mixture was then mixed with water (10 mL) and extracted with ethyl acetate ( $2 \times 15$  mL). The organic layer was dried over anhydrous sodium sulfate and was evaporated under reduced pressure. The residue so obtained was purified over column chromatography by eluting with hexane: ethyl acetate (97:3) mixture to afford the product **8'** as white solid in 66% yield.

## 7. General Procedure for the Synthesis of **10**

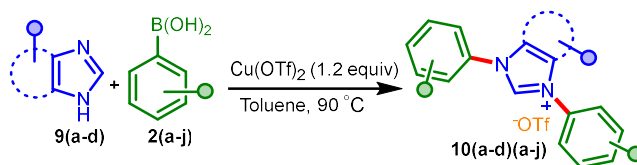

An oven-dried 5 mL round-bottom flask was charged with benzimidazole **9 a-b** (0.35 mmol) or imidazole **9 c-d** (0.35 mmol), phenylboronic acid **2 a-j** (0.88 mmol),  $\text{Cu(OTf)}_2$  (1.2 equiv, 0.42 mmol), and a magnetic stir bar in toluene (1.5 mL) and was heated at  $90^\circ\text{C}$  for 15 h. The progress of the reaction was monitored via TLC. After completion of the reaction, the solvent was removed by rotary evaporation. The reaction mixture was then purified over column chromatography by eluting with DCM: Methanol (95: 5) mixtures to afford the desired products [**10(a-d)(a-j)**] as white and light brown solids in 58%–79% yields.

## 8. General procedure for the Synthesis of 11

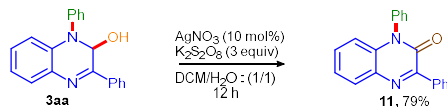

An oven-dried 5 mL round-bottom flask was charged with **3aa** (0.2 mmol, 60 mg),  $\text{AgNO}_3$  (10 mol%, 3 mg),  $\text{K}_2\text{S}_2\text{O}_8$  (3 equiv, 162 mg) and a magnetic stir bar in  $\text{DCM}/\text{H}_2\text{O}$  (1:1) (1.5 mL) and was stirred at rt for 12 h. The progress of the reaction was monitored via TLC. After completion of the reaction, the solvent was removed by rotary evaporation. The reaction mixture was then mixed with water (10 mL) and extracted with ethyl acetate ( $2 \times 15$  mL). The organic layer was dried over anhydrous sodium sulfate and was evaporated under reduced pressure. The residue so obtained was purified over column chromatography by eluting with hexane: ethyl acetate (98:2) mixture to afford the product **11** as white solid in 79% yield (47 mg).

## 9. General procedure for the Synthesis of 12

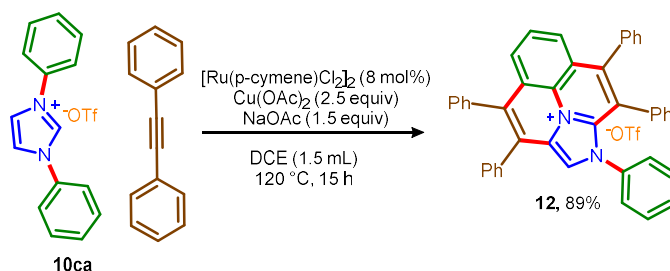

An oven-dried 5 mL round-bottom flask was charged with **10ca** (0.2 mmol, 74 mg), diphenylacetylene (0.4 mmol, 71 mg),  $[\text{Ru}(\text{p-cymene})\text{Cl}_2]_2$  (8 mol%, 10 mg),  $\text{Cu}(\text{OAc})_2$  (2.5 equiv, 90 mg),  $\text{NaOAc}$  (1.5 equiv, 24 mg) and a magnetic stir bar in  $\text{DCE}$  (1.5 mL) and was refluxed at  $120^\circ\text{C}$  for 15 h. The progress of the reaction was monitored via TLC. After completion of the reaction, the solvent was removed by rotary evaporation. The reaction mixture was then purified over column chromatography by eluting with  $\text{DCM}:\text{Methanol}$  (95: 5) mixtures to afford the product **12** as dark brown gummy solid in 89% yields (128 mg).

## 10. Mechanistic Studies

### A. Radical Scavenger

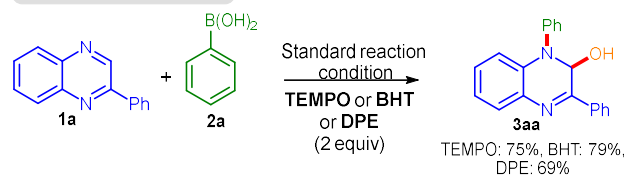

### B. H/D Exchange

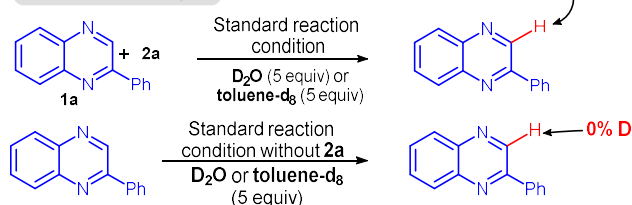

### C. Origin of Hydroxy Functionalities

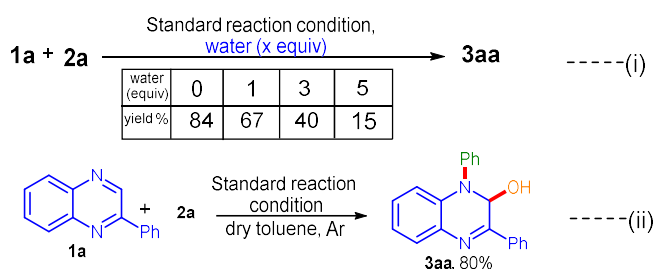

Scheme S1 Control reactions.

### (A) Procedure for Addition of Radical Scavenger:

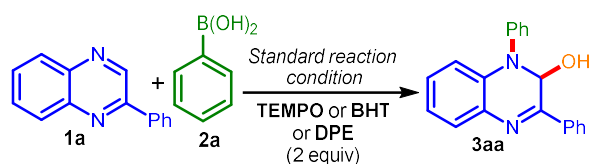

A 5 mL oven-dried round-bottom flask was charged with 2-phenylquinoxaline **1a** (0.35 mmol, 72 mg), phenylboronic acid **2a** (0.56 mmol, 68 mg), Cu(OTf)<sub>2</sub> (1.2 equiv, 0.42 mmol, 151 mg), TEMPO (2 equiv, 0.7 mmol, 109 mg) or BHT (2 equiv, 0.7 mmol, 154 mg) or 1,1-diphenylethylene (DPE) (2 equiv, 0.7 mmol, 126 mg) and a magnetic stir bar in toluene (1.5 mL) and was heated at 90 °C for 15 h. The solvent was removed by rotary evaporation. The reaction mixture was then mixed with water (10 mL) and extracted with ethyl acetate (2 × 15 mL). The organic layer was dried over anhydrous sodium sulfate and was evaporated under reduced pressure. The residue so obtained was purified over column chromatography by eluting with

hexane: ethyl acetate (96:4) mixture to afford the desired product **3aa** as yellow solid in 78 mg (75% yield) for TEMPO, 83 mg (79% yield) for BHT and 72 mg (69% yield) for DPE. This observation suggests non-involvement of any radical path.

**(B) Procedure for H/D exchange:**

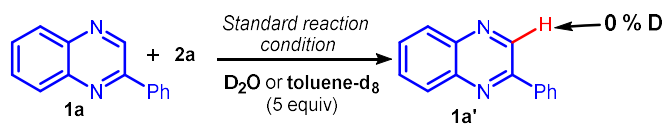

A 5 mL oven-dried round-bottom flask was charged with 2-phenylquinoxaline **1a** (0.35 mmol, 72 mg), phenylboronic acid **2a** (0.56 mmol, 68 mg), Cu(OTf)<sub>2</sub> (1.2 equiv, 0.42 mmol, 152 mg), D<sub>2</sub>O (5 equiv) or toluene-d<sub>8</sub> (5 equiv) and a magnetic stir bar in toluene (1.5 mL) and was heated at 90 °C for 15 h. The solvent was removed by rotary evaporation. The reaction mixture was then mixed with water (10 mL) and extracted with ethyl acetate (2 × 15 mL). The organic layer was dried over anhydrous sodium sulfate and was evaporated under reduced pressure. The residue so obtained was purified over column chromatography by eluting with hexane: ethyl acetate (96: 4) mixture to afford an orange product. The extent of deuteration was determined by comparing the <sup>1</sup>H NMR of **1a'** to that of un-deuterated 2-phenylquinoxaline **1a**. Upon comparison, no deuteration was observed.

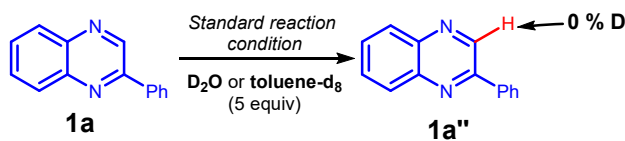

A 5 mL oven-dried round-bottom flask was charged with 2-phenylquinoxaline **1a** (0.35 mmol, 72 mg), Cu(OTf)<sub>2</sub> (1.2 equiv, 0.42 mmol, 152 mg), D<sub>2</sub>O (5 equiv) or toluene-d<sub>8</sub> (5 equiv) and a magnetic stir bar in toluene (1.5 mL) and was heated at 90 °C for 15 h. The solvent was removed by rotary evaporation. The reaction mixture was then mixed with water (10 mL) and extracted with ethyl acetate (2 × 15 mL). The organic layer was dried over anhydrous sodium sulfate and was evaporated under reduced pressure. The residue so obtained was purified over column chromatography by eluting with hexane: ethyl acetate (96: 4) mixture to afford an orange product. The extent of deuteration was determined by comparing the <sup>1</sup>H NMR **1a''** to that of un-deuterated 2-phenylquinoxaline **1a**. Upon comparison, no deuteration was observed.



## (C) Procedure for Investigation of Origin of Hydroxy Functionality

### (i) Addition of External Water

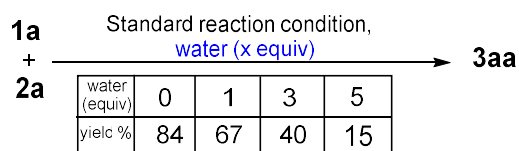

Four 5 mL oven-dried round-bottom flasks were charged with 2-phenylquinoxaline **1a** (0.35 mmol, 72 mg), phenylboronic acid **2a** (0.56 mmol, 68 mg), Cu(OTf)<sub>2</sub> (1.2 equiv, 0.42 mmol, 152 mg), H<sub>2</sub>O (0/ 1/ 3/ 5 equiv respectively) and a magnetic stir bar in toluene (1.5 mL) and was heated at 90 °C for 15 h. Solvents were removed by rotary evaporation. The reaction mixtures were then mixed with water (10 mL) and extracted with ethyl acetate (2 × 15 mL). The organic layers were dried over anhydrous sodium sulfate and evaporated under reduced pressure. The residue so obtained was purified over column chromatography by eluting with hexane: ethyl acetate (96: 4) mixtures to afford the product **3aa** as yellow solids in 84% (88 mg), 67% (70 mg), 40% (42 mg), 15% (16 mg) yields respectively for 0, 1, 3, 5 equiv of H<sub>2</sub>O added.

### (ii) Reaction in Dry Condition:

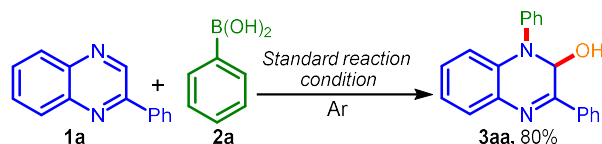

A 5 mL oven-dried round-bottom flask was charged with 2-phenylquinoxaline **1a** (0.35 mmol, 72 mg), purified phenylboronic acid **2a** (0.56 mmol, 68 mg), Cu(OTf)<sub>2</sub> (1.2 equiv, 0.42 mmol, 152 mg), and a magnetic stir bar in anhydrous toluene (1.5 mL) under an argon atmosphere and was heated at 90 °C for 15 h. The solvent was removed by rotary evaporation. The reaction mixture was then mixed with water (10 mL) and extracted with ethyl acetate (2 × 15 mL). The organic layer was dried over anhydrous sodium sulfate and was evaporated under reduced pressure. The residue so obtained was purified over column chromatography by eluting with hexane:ethyl acetate (96:4) mixture to afford the product **3aa** as yellow solids in 80% yield (84 mg).

### (iii) Reaction with Phenyltrifluoroborate (2a') in Lieu of Phenylboronic acid (2a)

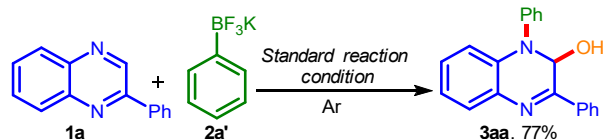

A 5 mL oven-dried round-bottom flask was charged with 2-phenylquinoxaline **1a** (0.35 mmol, 72 mg), potassium phenyltrifluoroborate (**2a'**) (0.56 mmol, 103 mg), Cu(OTf)<sub>2</sub> (1.2 equiv, 0.42 mmol, 152 mg) and a magnetic stir bar in anhydrous toluene (1.5 mL) under an argon atmosphere and was heated at 90 °C for 15 h. The solvent was removed by rotary evaporation. The reaction mixture was then mixed with water (10 mL) and extracted with ethyl acetate (2 × 15 mL). The organic layer was dried over anhydrous sodium sulfate and was evaporated under reduced pressure. The residue so obtained was purified over column chromatography by eluting with hexane: ethyl acetate (96: 4) mixture to afford the product **3aa** as yellow solid in 77% yield (81 mg).

#### (iv) Thermogravimetric (TGA) Analysis:

The thermogravimetric analysis (TGA) of the air exposed Cu(OTf)<sub>2</sub> salt was conducted from 29 ° to 400 °C to ensure the presence of absorbed H<sub>2</sub>O molecules in the metal salt (Figure S2). The TGA curve displays a single weight loss of 9% from 80 °C to 143 °C. This weight loss suggests the presence of two molecules of water per formula unit of Cu(OTf)<sub>2</sub>.

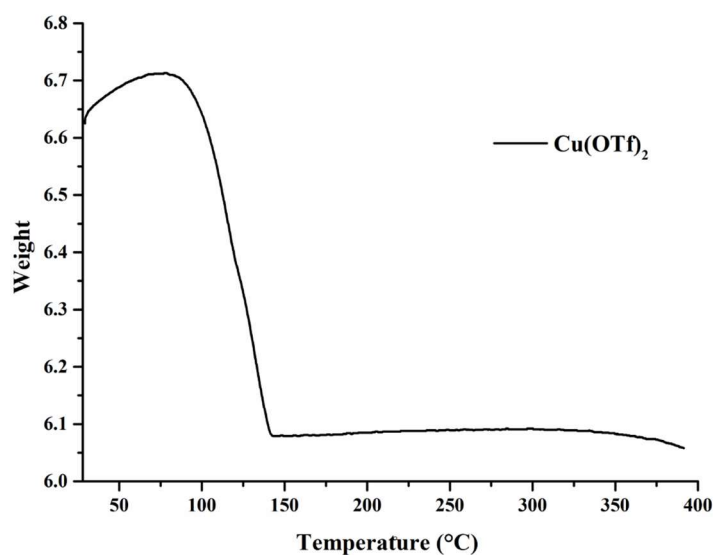

**Figure S2:** TGA curve of Cu(OTf)<sub>2</sub>.

**(D) HRMS analysis of crude reaction aliquot:**

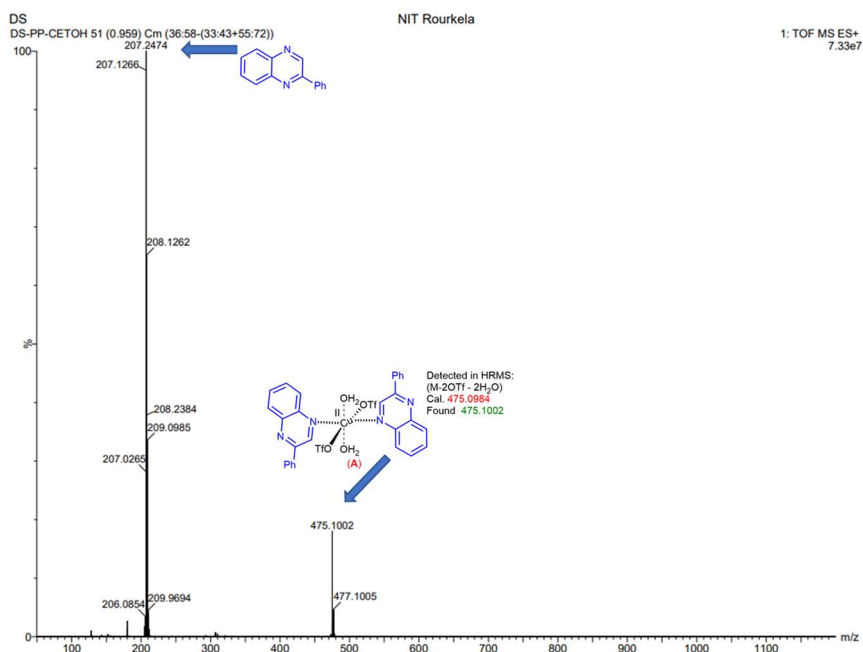

**Figure S3: Detection of complex A**

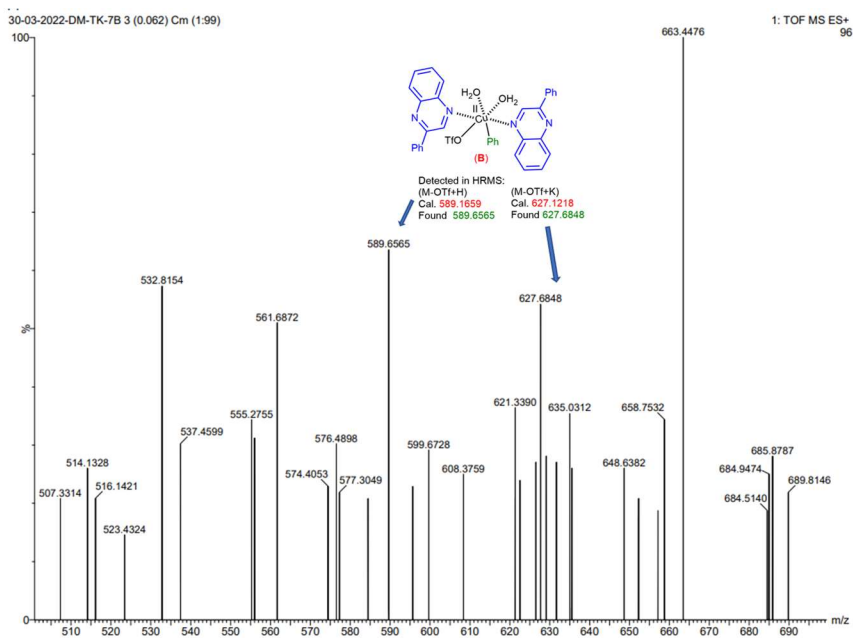

## 11. Crystallographic Description

Crystal data were collected with Bruker Smart Apex-II CCD diffractometer using graphite monochromated MoK $\alpha$  radiation ( $\lambda = 0.71073 \text{ \AA}$ ) at 298 K for **10aa** and **10ca**. While **3aa** was collected with a XtaLAB Pro II AFC12 (RINC): Kappa single diffractometer. Cell parameters were retrieved using SMART<sup>a</sup> software and refined with SAINT<sup>a</sup> on all observed reflections. Data reduction was performed with the SAINT software and corrected for Lorentz and polarization effects. Absorption corrections were applied with the program SADABS.<sup>b</sup> The structure was solved by direct methods implemented in SHELX-2014<sup>c</sup> program and refined by full-matrix least-squares methods on F<sup>2</sup>. All non-hydrogen atomic positions were located in difference Fourier maps and refined anisotropically. The hydrogen atoms were placed in their geometrically generated positions.

- SMART V 4.043 Software for the CCD Detector System; Siemens Analytical Instruments Division: Madison, WI, 2008.
- SAINT Plus (v 6.14) Bruker AXS Inc., Madison, WI, 2008.
- Sheldrick, G. M. SHELXL-2014, Program for the Refinement of Crystal Structures; University of Göttingen: Göttingen (Germany), 1997.

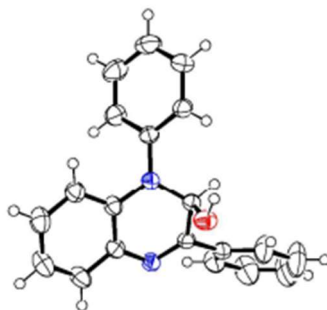

**Figure S5.** ORTEP diagram of **3aa** with ellipsoid probability 50%.

**Table S2.** Crystal Data table for **3aa**

|                   |                                                  |
|-------------------|--------------------------------------------------|
| Empirical formula | C <sub>20</sub> H <sub>16</sub> N <sub>2</sub> O |
| CCDC number       | 2215417                                          |
| Formula weight    | 300.36                                           |
| Temperature       | 298(2)                                           |
| Wavelength        | 0.71073 Å                                        |
| Crystal system    | orthorhombic                                     |

|                                   |                                                                                                                     |
|-----------------------------------|---------------------------------------------------------------------------------------------------------------------|
| Space group                       | Pbca                                                                                                                |
| Unit cell dimensions              | a = 9.0540(7) Å, b = 11.6026(5) Å, c = 29.7549(17) Å $\alpha = 90^\circ$ , $\beta = 90^\circ$ , $\gamma = 90^\circ$ |
| Volume                            | 3125.8 (3) Å <sup>3</sup>                                                                                           |
| Z                                 | 8                                                                                                                   |
| Density (calculated)              | 1.276 g/cm <sup>-3</sup>                                                                                            |
| Absorption coefficient            | 0.080                                                                                                               |
| F(000)                            | 1264                                                                                                                |
| Theta range for data collection   | 2.614 to 26.521°                                                                                                    |
| Index ranges                      | -7 <= h <= 10, -10 <= k <= 13, -31 <= l <= 35                                                                       |
| Reflections collected             | 11732                                                                                                               |
| Independent reflections           | 4877                                                                                                                |
| Data completeness                 | 1.00                                                                                                                |
| Max. and min. transmission        | 0.975, 0.972                                                                                                        |
| Refinement method                 | Full-matrix least-squares on F <sup>2</sup>                                                                         |
| Data / restraints / parameters    | 2761/ 0/ 212                                                                                                        |
| Goodness-of-fit on F <sup>2</sup> | 1.020                                                                                                               |
| Final R indices [I > 2sigma(I)]   | 0.0568, wR2 = 0.1140                                                                                                |
| R indices (all data)              | 0.0740, wR2 = 0.1215                                                                                                |

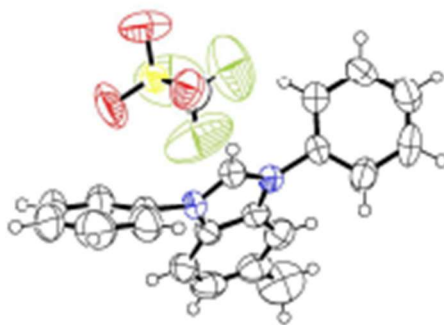

**Figure S6.** ORTEP diagram of **10aa** with ellipsoid probability 50%.

**Table S3. Crystal Data table for 10aa**

|                   |                                                                                |
|-------------------|--------------------------------------------------------------------------------|
| Empirical formula | C <sub>21</sub> H <sub>17</sub> F <sub>3</sub> O <sub>3</sub> N <sub>2</sub> S |
| CCDC number       | 2215422                                                                        |
| Formula weight    | 434.42                                                                         |
| Temperature       | 298                                                                            |

|                                   |                                                                                                                             |
|-----------------------------------|-----------------------------------------------------------------------------------------------------------------------------|
| Wavelength                        | 0.71073 Å                                                                                                                   |
| Crystal system                    | monoclinic                                                                                                                  |
| Space group                       | P 21/n                                                                                                                      |
| Unit cell dimensions              | a = 11.7342(7) Å, b = 10.5428(6) Å, c = 16.8353(10) Å $\alpha = 90^\circ$ , $\beta = 90.689(2)^\circ$ , $\gamma = 90^\circ$ |
| Volume                            | 2082.6 (2) Å <sup>3</sup>                                                                                                   |
| Z                                 | 4                                                                                                                           |
| Density (calculated)              | 1.386 g/cm <sup>-3</sup>                                                                                                    |
| Absorption coefficient            | 0.207                                                                                                                       |
| F(000)                            | 896                                                                                                                         |
| Theta range for data collection   | 2.60 to 20.84°                                                                                                              |
| Index ranges                      | -11 ≤ h ≤ 11, -10 ≤ k ≤ 10, -16 ≤ l ≤ 16                                                                                    |
| Reflections collected             | 38013                                                                                                                       |
| Independent reflections           | 9900                                                                                                                        |
| Data completeness                 | 1                                                                                                                           |
| Max. and min. transmission        | 0.7446, 0.6005                                                                                                              |
| Refinement method                 | Full-matrix least-squares on F <sup>2</sup>                                                                                 |
| Data / restraints / parameters    | 2195/ 0/ 272                                                                                                                |
| Goodness-of-fit on F <sup>2</sup> | 1.027                                                                                                                       |
| Final R indices [I > 2σ(I)]       | 0.0963, wR2 = 0.1720                                                                                                        |
| R indices (all data)              | 0.1158, wR2 = 0.1846                                                                                                        |

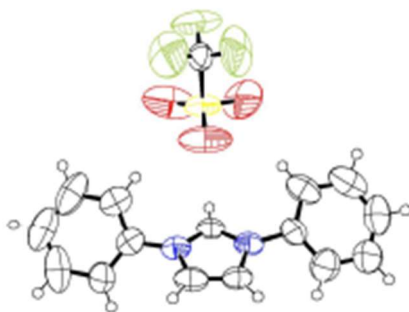

**Figure S7.** ORTEP diagram of **10ca** with ellipsoid probability 50%.

**Table S4.** Crystal Data table for **10ca**

|                   |                                                                                |
|-------------------|--------------------------------------------------------------------------------|
| Empirical formula | C <sub>16</sub> H <sub>13</sub> F <sub>3</sub> O <sub>3</sub> N <sub>2</sub> S |
| CCDC number       | 2215420                                                                        |
| Formula weight    | 370.34                                                                         |

|                                   |                                                                                                                       |
|-----------------------------------|-----------------------------------------------------------------------------------------------------------------------|
| Temperature                       | 298                                                                                                                   |
| Wavelength                        | 0.71073 Å                                                                                                             |
| Crystal system                    | orthorhombic                                                                                                          |
| Space group                       | Pnma                                                                                                                  |
| Unit cell dimensions              | a = 10.1440 (5) Å, b = 17.4540 (9) Å, c = 9.2908 (5) Å $\alpha = 90^\circ$ , $\beta = 90^\circ$ , $\gamma = 90^\circ$ |
| Volume                            | 1644.97 (15) Å <sup>3</sup>                                                                                           |
| Z                                 | 4                                                                                                                     |
| Density (calculated)              | 1.495 g/cm <sup>-3</sup>                                                                                              |
| Absorption coefficient            | 0.247                                                                                                                 |
| F(000)                            | 760                                                                                                                   |
| Theta range for data collection   | 2.97 to 26.10°                                                                                                        |
| Index ranges                      | -12 ≤ h ≤ 12, -20 ≤ k ≤ 20, -11 ≤ l ≤ 11                                                                              |
| Reflections collected             | 41668                                                                                                                 |
| Independent reflections           | 9788                                                                                                                  |
| Data completeness                 | 1                                                                                                                     |
| Max. and min. transmission        | 0.7454, 0.5754                                                                                                        |
| Refinement method                 | Full-matrix least-squares on F <sup>2</sup>                                                                           |
| Data / restraints / parameters    | 1499 / 0 / 121                                                                                                        |
| Goodness-of-fit on F <sup>2</sup> | 1.098                                                                                                                 |
| Final R indices [I > 2σ(I)]       | 0.0747, wR2 = 0.1379                                                                                                  |
| R indices (all data)              | 0.0883, wR2 = 0.1477                                                                                                  |

## 12. Plausible Mechanism for the Formation of 10:

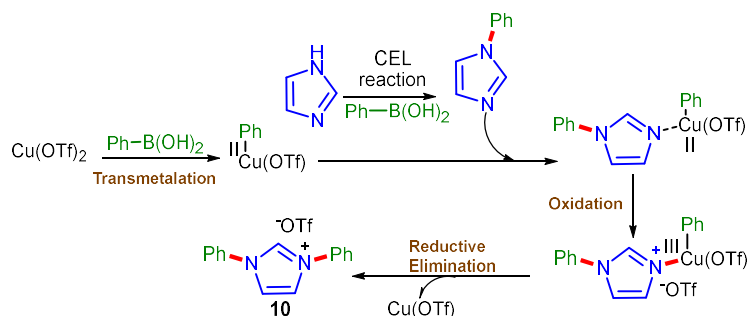

**Scheme S2.** Plausible mechanism for **10**.

### 13. Post-Synthetic Modifications:

The C–OH group of **3aa** can be oxidized using AgNO<sub>3</sub>/ K<sub>2</sub>S<sub>2</sub>O<sub>8</sub> to deliver amide **11** in good yield (79%) (Scheme S3).<sup>3</sup> Also, modification of **10ca** upon treatment with diphenyl acetylene under ruthenium catalysis offered a dual C–H/C–H annulated product **12** (89%).<sup>4</sup>

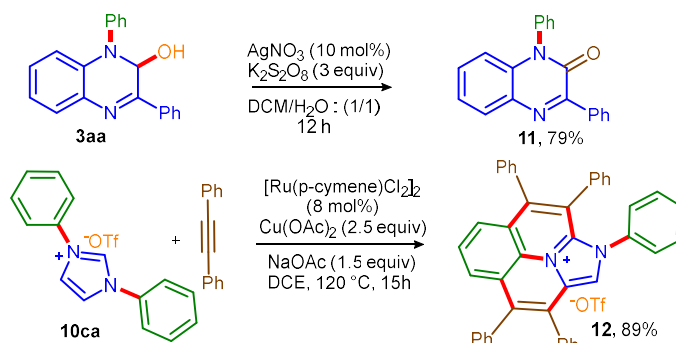

**Scheme S3.** Post-synthetic modification. Yield refers to the isolated product.

### 14. References:

1. K. Kumar, S. R. Mudshinge, S. Goyal, M. Gangar and V. A. Nair, *Tetrahedron Letters*. 2015 **56**, 1266.
2. (a) L. Niu, J. Liu, X. A. Liang, S. Wang and A. Lei, *Nat Commun* 2019, **10**, 467. (b) Y. Kong, W. Xu, X. Liu and J. Weng, *Chinese Chemical Letters* 2020, **31**, 3245.
3. J. Yu, H. Zhao, S. Liang, X. Bao and C. Zhu, *Org. Biomol. Chem.*, 2015, **13**, 7924.
4. (a) Q. Ge, B. Li, H. Song and B. Wang, *Org. Biomol. Chem.*, 2015, **13**, 7695. (b) R. Thenarukandiyil, S. K. Gupta and J. Choudhury, *ACS Catal.* 2016, **6**, 5132.

### 15. DFT calculation:

#### Input file of 3aa

```
-----  
Center   Atomic   Atomic   Coordinates (Angstroms)  
Number   Number   Type      X         Y         Z  
-----  
1         6         0        -2.500600  1.031300  0.000000  
2         6         0        -2.500600  0.206200  0.000000  
-----
```



|    |   |   |           |           |          |
|----|---|---|-----------|-----------|----------|
| 3  | 6 | 0 | -1.786200 | -0.206200 | 0.000000 |
| 4  | 6 | 0 | -1.071700 | 0.206200  | 0.000000 |
| 5  | 6 | 0 | -1.071700 | 1.031300  | 0.000000 |
| 6  | 6 | 0 | -1.786200 | 1.443700  | 0.000000 |
| 7  | 7 | 0 | -0.357200 | -0.206200 | 0.000000 |
| 8  | 6 | 0 | 0.357200  | 0.206200  | 0.000000 |
| 9  | 6 | 0 | 0.357200  | 1.031300  | 0.000000 |
| 10 | 7 | 0 | -0.357200 | 1.443700  | 0.000000 |
| 11 | 6 | 0 | 1.071700  | -0.206200 | 0.000000 |
| 12 | 6 | 0 | 1.071700  | -1.031300 | 0.000000 |
| 13 | 6 | 0 | 1.786200  | -1.443700 | 0.000000 |
| 14 | 6 | 0 | 2.500600  | -1.031300 | 0.000000 |
| 15 | 6 | 0 | 2.500600  | -0.206200 | 0.000000 |
| 16 | 6 | 0 | 1.786200  | 0.206300  | 0.000000 |
| 17 | 1 | 0 | -3.427231 | 1.566329  | 0.000000 |
| 18 | 1 | 0 | -3.427231 | -0.328829 | 0.000000 |
| 19 | 1 | 0 | -1.786232 | -1.276200 | 0.000000 |
| 20 | 1 | 0 | -1.786232 | 2.513700  | 0.000000 |
| 21 | 1 | 0 | 1.283831  | 1.566329  | 0.000000 |
| 22 | 1 | 0 | 0.145086  | -1.566357 | 0.000000 |
| 23 | 1 | 0 | 1.786232  | -2.513700 | 0.000000 |
| 24 | 1 | 0 | 3.427231  | -1.566329 | 0.000000 |
| 25 | 1 | 0 | 3.427259  | 0.328780  | 0.000000 |
| 26 | 1 | 0 | 1.786232  | 1.276300  | 0.000000 |

-----  
**Input file of Pyridine:**  
 -----

| Center | Atomic | Atomic | Coordinates (Angstroms) |  |  |
|--------|--------|--------|-------------------------|--|--|
|--------|--------|--------|-------------------------|--|--|

| Number | Number | Type | X         | Y         | Z        |
|--------|--------|------|-----------|-----------|----------|
| 1      | 6      | 0    | -0.714500 | 0.412500  | 0.000000 |
| 2      | 6      | 0    | -0.714500 | -0.412500 | 0.000000 |
| 3      | 7      | 0    | 0.000000  | -0.825000 | 0.000000 |
| 4      | 6      | 0    | 0.714500  | -0.412500 | 0.000000 |
| 5      | 6      | 0    | 0.714500  | 0.412500  | 0.000000 |
| 6      | 6      | 0    | 0.000000  | 0.825000  | 0.000000 |
| 7      | 1      | 0    | -1.641142 | 0.947508  | 0.000000 |
| 8      | 1      | 0    | -1.641142 | -0.947508 | 0.000000 |
| 9      | 1      | 0    | 1.641142  | -0.947508 | 0.000000 |
| 10     | 1      | 0    | 1.641142  | 0.947508  | 0.000000 |
| 11     | 1      | 0    | 0.000000  | 1.895000  | 0.000000 |

**Input file of 4:**

| Center<br>Number | Atomic<br>Number | Atomic<br>Type | Coordinates (Angstroms) |           |          |
|------------------|------------------|----------------|-------------------------|-----------|----------|
|                  |                  |                | X                       | Y         | Z        |
| 1                | 6                | 0              | -2.500600               | 1.031300  | 0.000000 |
| 2                | 6                | 0              | -2.500600               | 0.206200  | 0.000000 |
| 3                | 6                | 0              | -1.786200               | -0.206200 | 0.000000 |
| 4                | 6                | 0              | -1.071700               | 0.206200  | 0.000000 |
| 5                | 6                | 0              | -1.071700               | 1.031300  | 0.000000 |
| 6                | 6                | 0              | -1.786200               | 1.443700  | 0.000000 |
| 7                | 7                | 0              | -0.357200               | -0.206200 | 0.000000 |
| 8                | 6                | 0              | 0.357200                | 0.206200  | 0.000000 |
| 9                | 6                | 0              | 0.357200                | 1.031300  | 0.000000 |
| 10               | 7                | 0              | -0.357200               | 1.443700  | 0.000000 |

|    |   |   |           |           |          |
|----|---|---|-----------|-----------|----------|
| 11 | 6 | 0 | 1.071700  | -0.206200 | 0.000000 |
| 12 | 6 | 0 | 1.071700  | -1.031300 | 0.000000 |
| 13 | 6 | 0 | 1.786200  | -1.443700 | 0.000000 |
| 14 | 6 | 0 | 2.500600  | -1.031300 | 0.000000 |
| 15 | 6 | 0 | 2.500600  | -0.206200 | 0.000000 |
| 16 | 6 | 0 | 1.786200  | 0.206300  | 0.000000 |
| 17 | 1 | 0 | -3.427231 | 1.566329  | 0.000000 |
| 18 | 1 | 0 | -3.427231 | -0.328829 | 0.000000 |
| 19 | 1 | 0 | -1.786232 | -1.276200 | 0.000000 |
| 20 | 1 | 0 | -1.786232 | 2.513700  | 0.000000 |
| 21 | 1 | 0 | 1.283831  | 1.566329  | 0.000000 |
| 22 | 1 | 0 | 0.145086  | -1.566357 | 0.000000 |
| 23 | 1 | 0 | 1.786232  | -2.513700 | 0.000000 |
| 24 | 1 | 0 | 3.427231  | -1.566329 | 0.000000 |
| 25 | 1 | 0 | 3.427259  | 0.328780  | 0.000000 |
| 26 | 1 | 0 | 1.786232  | 1.276300  | 0.000000 |

-----

**Input file of 5:**

-----

| Center | Atomic | Atomic | Coordinates (Angstroms) |           |          |
|--------|--------|--------|-------------------------|-----------|----------|
| Number | Number | Type   | X                       | Y         | Z        |
| 1      | 6      | 0      | -1.428900               | 0.412500  | 0.000000 |
| 2      | 6      | 0      | -1.428900               | -0.412500 | 0.000000 |
| 3      | 6      | 0      | -0.714500               | -0.825000 | 0.000000 |
| 4      | 6      | 0      | 0.000000                | -0.412500 | 0.000000 |

|    |   |   |           |           |          |
|----|---|---|-----------|-----------|----------|
| 5  | 6 | 0 | 0.000000  | 0.412500  | 0.000000 |
| 6  | 6 | 0 | -0.714500 | 0.825000  | 0.000000 |
| 7  | 7 | 0 | 0.714500  | -0.825000 | 0.000000 |
| 8  | 6 | 0 | 1.428900  | -0.412500 | 0.000000 |
| 9  | 6 | 0 | 1.428900  | 0.412500  | 0.000000 |
| 10 | 7 | 0 | 0.714500  | 0.825000  | 0.000000 |
| 11 | 1 | 0 | -2.355559 | 0.947480  | 0.000000 |
| 12 | 1 | 0 | -2.355559 | -0.947480 | 0.000000 |
| 13 | 1 | 0 | -0.714532 | -1.895000 | 0.000000 |
| 14 | 1 | 0 | -0.714532 | 1.895000  | 0.000000 |
| 15 | 1 | 0 | 2.355559  | -0.947480 | 0.000000 |
| 16 | 1 | 0 | 2.355559  | 0.947480  | 0.000000 |

-----

**Input file of 6:**

-----

| Center<br>Number | Atomic<br>Number | Atomic<br>Type | Coordinates (Angstroms) |           |          |
|------------------|------------------|----------------|-------------------------|-----------|----------|
|                  |                  |                | X                       | Y         | Z        |
| 1                | 6                | 0              | -1.786200               | 0.412500  | 0.000000 |
| 2                | 6                | 0              | -1.786200               | -0.412500 | 0.000000 |
| 3                | 6                | 0              | -1.071700               | -0.825000 | 0.000000 |
| 4                | 6                | 0              | -0.357200               | -0.412500 | 0.000000 |
| 5                | 6                | 0              | -0.357200               | 0.412500  | 0.000000 |
| 6                | 6                | 0              | -1.071700               | 0.825000  | 0.000000 |
| 7                | 7                | 0              | 0.357200                | -0.825000 | 0.000000 |
| 8                | 6                | 0              | 1.071700                | -0.412500 | 0.000000 |
| 9                | 6                | 0              | 1.071700                | 0.412500  | 0.000000 |
| 10               | 7                | 0              | 0.357200                | 0.825000  | 0.000000 |
| 11               | 6                | 0              | 1.786200                | -0.825000 | 0.000000 |

|    |   |   |           |           |           |
|----|---|---|-----------|-----------|-----------|
| 12 | 1 | 0 | -2.712842 | 0.947508  | 0.000000  |
| 13 | 1 | 0 | -2.712842 | -0.947508 | 0.000000  |
| 14 | 1 | 0 | -1.071700 | -1.895000 | 0.000000  |
| 15 | 1 | 0 | -1.071700 | 1.895000  | 0.000000  |
| 16 | 1 | 0 | 1.998342  | 0.947508  | 0.000000  |
| 17 | 1 | 0 | 2.599473  | -0.129668 | 0.000000  |
| 18 | 1 | 0 | 1.842892  | -1.440158 | 0.873651  |
| 19 | 1 | 0 | 1.842892  | -1.440158 | -0.873651 |

-----  
**Input file of 7:**  
 -----

| Center<br>Number | Atomic<br>Number | Atomic<br>Type | Coordinates (Angstroms) |           |          |
|------------------|------------------|----------------|-------------------------|-----------|----------|
|                  |                  |                | X                       | Y         | Z        |
| 1                | 6                | 0              | -1.428900               | 0.412500  | 0.000000 |
| 2                | 6                | 0              | -1.428900               | -0.412500 | 0.000000 |
| 3                | 6                | 0              | -0.714500               | -0.825000 | 0.000000 |
| 4                | 6                | 0              | 0.000000                | -0.412500 | 0.000000 |
| 5                | 6                | 0              | 0.000000                | 0.412500  | 0.000000 |
| 6                | 6                | 0              | -0.714500               | 0.825000  | 0.000000 |
| 7                | 6                | 0              | 0.714500                | -0.825000 | 0.000000 |
| 8                | 7                | 0              | 1.428900                | -0.412500 | 0.000000 |
| 9                | 6                | 0              | 1.428900                | 0.412500  | 0.000000 |
| 10               | 6                | 0              | 0.714500                | 0.825000  | 0.000000 |
| 11               | 1                | 0              | -2.355559               | 0.947480  | 0.000000 |
| 12               | 1                | 0              | -2.355559               | -0.947480 | 0.000000 |
| 13               | 1                | 0              | -0.714532               | -1.895000 | 0.000000 |
| 14               | 1                | 0              | -0.714532               | 1.895000  | 0.000000 |
| 15               | 1                | 0              | 0.714532                | -1.895000 | 0.000000 |

|    |   |   |          |          |          |
|----|---|---|----------|----------|----------|
| 16 | 1 | 0 | 2.355559 | 0.947480 | 0.000000 |
| 17 | 1 | 0 | 0.714532 | 1.895000 | 0.000000 |

-----  
**Input file of 8:**  
 -----

| Center<br>Number | Atomic<br>Number | Atomic<br>Type | Coordinates (Angstroms) |           |          |
|------------------|------------------|----------------|-------------------------|-----------|----------|
|                  |                  |                | X                       | Y         | Z        |
| 1                | 6                | 0              | -1.428900               | 0.412500  | 0.000000 |
| 2                | 6                | 0              | -1.428900               | -0.412500 | 0.000000 |
| 3                | 6                | 0              | -0.714500               | -0.825000 | 0.000000 |
| 4                | 6                | 0              | 0.000000                | -0.412500 | 0.000000 |
| 5                | 6                | 0              | 0.000000                | 0.412500  | 0.000000 |
| 6                | 6                | 0              | -0.714500               | 0.825000  | 0.000000 |
| 7                | 7                | 0              | 0.714500                | -0.825000 | 0.000000 |
| 8                | 6                | 0              | 1.428900                | -0.412500 | 0.000000 |
| 9                | 6                | 0              | 1.428900                | 0.412500  | 0.000000 |
| 10               | 6                | 0              | 0.714500                | 0.825000  | 0.000000 |
| 11               | 1                | 0              | -2.355559               | 0.947480  | 0.000000 |
| 12               | 1                | 0              | -2.355559               | -0.947480 | 0.000000 |
| 13               | 1                | 0              | -0.714532               | -1.895000 | 0.000000 |
| 14               | 1                | 0              | -0.714532               | 1.895000  | 0.000000 |
| 15               | 1                | 0              | 2.355559                | -0.947480 | 0.000000 |
| 16               | 1                | 0              | 2.355559                | 0.947480  | 0.000000 |
| 17               | 1                | 0              | 0.714532                | 1.895000  | 0.000000 |

-----  
**Input file of 9a':**  
 -----

| Center | Atomic | Atomic | Coordinates (Angstroms) |  |  |
|--------|--------|--------|-------------------------|--|--|
|--------|--------|--------|-------------------------|--|--|

| Number | Number | Type | X         | Y         | Z        |
|--------|--------|------|-----------|-----------|----------|
| 1      | 6      | 0    | -1.349200 | 0.412500  | 0.000000 |
| 2      | 6      | 0    | -1.349200 | -0.412500 | 0.000000 |
| 3      | 6      | 0    | -0.634800 | -0.825000 | 0.000000 |
| 4      | 6      | 0    | 0.079700  | -0.412500 | 0.000000 |
| 5      | 6      | 0    | 0.079700  | 0.412500  | 0.000000 |
| 6      | 6      | 0    | -0.634800 | 0.825000  | 0.000000 |
| 7      | 7      | 0    | 0.864300  | -0.667400 | 0.000000 |
| 8      | 6      | 0    | 1.349200  | 0.000000  | 0.000000 |
| 9      | 7      | 0    | 0.864300  | 0.667400  | 0.000000 |
| 10     | 1      | 0    | -2.275859 | 0.947480  | 0.000000 |
| 11     | 1      | 0    | -2.275859 | -0.947480 | 0.000000 |
| 12     | 1      | 0    | -0.634832 | -1.895000 | 0.000000 |
| 13     | 1      | 0    | -0.634832 | 1.895000  | 0.000000 |
| 14     | 1      | 0    | 2.419200  | 0.000000  | 0.000000 |
| 15     | 1      | 0    | 1.018816  | 1.142926  | 0.866025 |

**Input file of 9c:**

| Center<br>Number | Atomic<br>Number | Atomic<br>Type | Coordinates (Angstroms) |           |          |
|------------------|------------------|----------------|-------------------------|-----------|----------|
|                  |                  |                | X                       | Y         | Z        |
| 1                | 6                | 0              | -0.634800               | 0.412500  | 0.000000 |
| 2                | 6                | 0              | -0.634800               | -0.412500 | 0.000000 |
| 3                | 7                | 0              | 0.149800                | -0.667400 | 0.000000 |
| 4                | 6                | 0              | 0.634800                | 0.000000  | 0.000000 |

|   |   |   |           |           |          |
|---|---|---|-----------|-----------|----------|
| 5 | 7 | 0 | 0.149800  | 0.667400  | 0.000000 |
| 6 | 1 | 0 | -1.500437 | 1.041446  | 0.000000 |
| 7 | 1 | 0 | -1.500437 | -1.041446 | 0.000000 |
| 8 | 1 | 0 | 0.304293  | -1.142933 | 0.866025 |
| 9 | 1 | 0 | 1.704800  | 0.000000  | 0.000000 |

---

## 16. Spectral Data

### 1,3-Diphenyl-1,2-dihydroquinoxalin-2-ol (**3aa**)

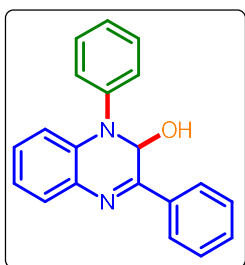

Yellow solid (88 mg, 84% yield), m.p. 150-153 °C.  $^1\text{H}$  NMR (500 MHz,  $\text{CDCl}_3$ )  $\delta$  8.11-8.09 (m, 2H), 7.63 (d,  $J = 8$  Hz, 1H), 7.55 (d,  $J = 7.5$  Hz, 2H), 7.45–7.42 (m, 5H), 7.28 (t,  $J = 7.5$  Hz, 1H), 7.14 (t,  $J = 7.5$  Hz, 1H), 7.02–6.97 (m, 2H), 6.06 (s, 1H), 3.03 (s, 1H).;  $^{13}\text{C}\{^1\text{H}\}$  NMR (101 MHz,  $\text{CDCl}_3$ )  $\delta$  153.6, 143.4, 136.1, 133.7, 132.4, 130.7, 129.7, 128.9, 128.6, 128.4, 127.5, 126.2, 125.3, 120.7, 115.8, 76.1. IR (neat,  $\text{cm}^{-1}$ ) 3153, 3064, 1591, 1482, 1451, 1325, 1253, 1048, 750, 692. HRMS (ESI)  $[\text{M} - \text{OH}]^+$  calcd for  $\text{C}_{20}\text{H}_{15}\text{N}_2^+$  283.1235, found 283.1237.

### 3-(4-Methoxyphenyl)-1-phenyl-1,2-dihydroquinoxalin-2-ol (**3ba**)

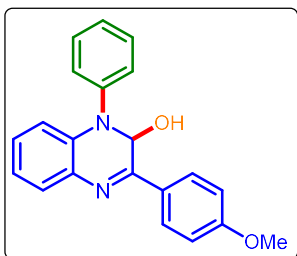

Yellow solid (90 mg, 78% yield); m.p. 145-150 °C.  $^1\text{H}$  NMR (500 MHz,  $\text{CDCl}_3$ )  $\delta$  8.06 (d,  $J = 9$  Hz, 2H), 7.59 (d,  $J = 8$  Hz, 1H), 7.55 (d,  $J = 8$  Hz, 2H), 7.43 (t,  $J = 7.7$  Hz, 2H), 7.28 (d,  $J = 7.5$  Hz, 1H), 7.11 (t,  $J = 7.5$  Hz, 1H), 7.00 (d,  $J = 8$  Hz, 1H), 6.96 (t,  $J = 7.8$  Hz, 3H), 6.04 (s, 1H), 3.86 (s, 3H), 3.02 (s, 1H).;  $^{13}\text{C}\{^1\text{H}\}$  NMR (101 MHz,  $\text{CDCl}_3$ )  $\delta$  161.8, 153.3, 143.6, 133.9, 132.2, 129.7, 129.2, 128.8, 128.3, 127.9, 126.0, 125.2, 120.7, 115.8, 114.2, 76.0, 55.6. IR (neat,  $\text{cm}^{-1}$ ) 3319, 1601, 1486, 1306, 1250, 1023, 956, 834, 746. HRMS (ESI)  $[\text{M} - \text{OH}]^+$  calcd for  $\text{C}_{21}\text{H}_{17}\text{N}_2\text{O}^+$  313.1341, found 313.1339.



*1-Phenyl-3-(p-tolyl)-1,2-dihydroquinoxalin-2-ol (3ca)*

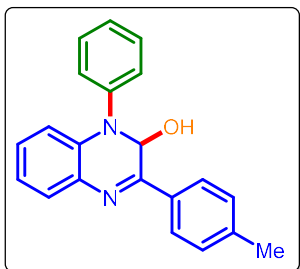

Yellow solid (88 mg, 80% yield); m.p. 190-192 °C.  $^1\text{H}$  NMR (500 MHz,  $\text{CDCl}_3$ )  $\delta$  7.95 (d,  $J = 8.0$  Hz, 2H), 7.54 (d,  $J = 8$  Hz, 3H), 7.42 (t,  $J = 7.8$  Hz, 2H), 7.27 (d,  $J = 7.5$  Hz, 1H), 7.21 (d,  $J = 7.5$  Hz, 2H), 7.09 (t,  $J = 7.7$  Hz, 1H), 6.98 (d,  $J = 8$  Hz, 1H), 6.92 (t,  $J = 7.5$  Hz, 1H), 6.02 (s, 1H), 3.32 (s, 1H), 2.39 (s, 3H).;  $^{13}\text{C}\{^1\text{H}\}$  NMR (126 MHz,  $\text{CDCl}_3$ )  $\delta$  153.6, 143.5, 141.0, 133.8, 133.3, 132.3, 129.7, 129.5, 128.4, 128.2, 127.5, 126.1, 125.3, 120.6, 115.7, 76.1, 21.6. IR (neat,  $\text{cm}^{-1}$ ) 3127, 1591, 1484, 1327, 1288, 1255, 1046, 1023, 750, 693, 473. HRMS (ESI)  $[\text{M} - \text{OH}]^+$  calcd for  $\text{C}_{21}\text{H}_{17}\text{N}_2^+$  297.1392, found 297.1393.

*3-(4-Isopropylphenyl)-1-phenyl-1,2-dihydroquinoxalin-2-ol (3da)*

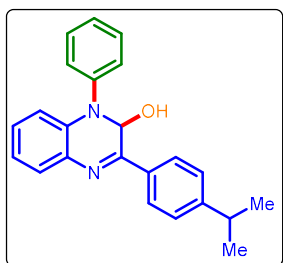

Yellow solid (98 mg, 82% yield); m.p. 154- 158 °C.  $^1\text{H}$  NMR (500 MHz,  $\text{CDCl}_3$ )  $\delta$  8.05 (d,  $J = 8.0$  Hz, 2H), 7.65 (d,  $J = 8$  Hz, 1H), 7.55 (d,  $J = 8$  Hz, 2H), 7.44 (t,  $J = 7.7$  Hz, 2H), 7.33–7.29 (m, 3H), 7.14 (t,  $J = 7.3$  Hz, 1H), 7.03–7.00 (m, 2H), 6.06 (d,  $J = 8.5$  Hz, 1H), 2.99–2.92 (m, 1H), 2.78 (d,  $J = 10.5$  Hz, 1H), 1.27 (d,  $J = 7.0$  Hz, 6H).;  $^{13}\text{C}\{^1\text{H}\}$  NMR (151 MHz,  $\text{CDCl}_3$ )  $\delta$  153.7, 152.0, 143.5, 133.9, 133.8, 132.4, 129.7, 128.6, 128.2, 127.6, 127.0, 126.1, 125.3, 120.7, 115.9, 76.1, 34.3, 24.0, 23.9. IR (neat,  $\text{cm}^{-1}$ ) 3335, 2960, 1667, 1595, 1491, 1329, 1017, 838, 750, 697. HRMS (ESI)  $[\text{M} - \text{OH}]^+$  calcd for  $\text{C}_{23}\text{H}_{21}\text{N}_2^+$  325.1705, found 325.1712.

*3-(4-Fluorophenyl)-1-phenyl-1,2-dihydroquinoxalin-2-ol (3ea)*

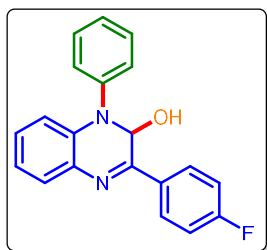

Yellow solid (84 mg, 75% yield); m.p. 127-130 °C.  $^1\text{H}$  NMR (500 MHz,  $\text{CDCl}_3$ )  $\delta$  8.11–8.08 (m, 2H), 7.59 (d,  $J = 7.5$  Hz, 1H), 7.55 (d,  $J = 7.5$  Hz, 2H), 7.44 (t,  $J = 7.8$  Hz, 2H), 7.29 (t,  $J = 7.5$  Hz, 1H), 7.16–7.10 (m, 3H), 7.01–6.96 (m, 2H), 6.01 (d,  $J = 10.5$  Hz, 1H), 3.04 (d,  $J = 10.5$  Hz, 1H).;  $^{13}\text{C}\{^1\text{H}\}$  NMR (126 MHz,  $\text{CDCl}_3$ )  $\delta$  165.4, 163.4, 152.5, 143.4, 133.6, 132.4 (d,  $J = 3.2$  Hz), 132.3, 129.8, 129.7

(d,  $J = 8.7$  Hz), 128.5 (d,  $J = 8.8$  Hz), 126.3, 125.3, 120.8, 116.0, 115.8 (d,  $J = 6.3$  Hz), 76.1.  $^{19}\text{F}$  NMR (471 MHz,  $\text{CDCl}_3$ )  $\delta$  -109.68. IR (neat,  $\text{cm}^{-1}$ ) 3194, 1592, 1490, 1318, 1225, 1155, 973, 831, 745, 697. HRMS (ESI)  $[\text{M} - \text{OH}]^+$  calcd for  $\text{C}_{20}\text{H}_{14}\text{FN}_2^+$  301.1141, found 301.1142.

*1-Phenyl-3-(4-(trifluoromethyl)phenyl)-1,2-dihydroquinoxalin-2-ol (3fa)*

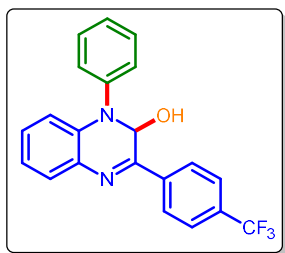

Yellow solid (82 mg, 64% yield); m.p. 70-72 °C.  $^1\text{H}$  NMR (400 MHz,  $\text{CDCl}_3$ )  $\delta$  8.18 (d,  $J = 8$  Hz, 2H), 7.67 (d,  $J = 8.4$  Hz, 2H), 7.59-7.55 (m, 3H), 7.45 (t,  $J = 7.8$  Hz, 2H), 7.31 (t,  $J = 7.2$  Hz, 1H), 7.15 (t,  $J = 7.7$  Hz, 1H), 6.99 (d,  $J = 8.4$  Hz, 1H), 6.96 (t,  $J = 7.7$  Hz, 1H), 6.02 (s, 1H), 3.38 (s, 1H).;  $^{13}\text{C}$   $\{^1\text{H}\}$  NMR (126 MHz,  $\text{CDCl}_3$ )  $\delta$  151.8, 143.2, 139.3, 133.4, 132.5, 132.0 (d,  $J = 32$  Hz), 129.8, 129.2, 128.8, 127.8, 127.5, 126.5, 125.7 (q,  $J = 3.9$  Hz), 125.5, 120.8, 115.9, 76.0. IR (neat,  $\text{cm}^{-1}$ ) 3288, 1590, 1487, 1409, 1318, 1164, 1115, 1066, 1014, 747. HRMS (ESI)  $[\text{M} - \text{OH}]^+$  calcd for  $\text{C}_{21}\text{H}_{14}\text{F}_3\text{N}_2^+$  351.1109, found. 351.1125.

*3-(4-Chlorophenyl)-1-phenyl-1,2-dihydroquinoxalin-2-ol (3ga)*

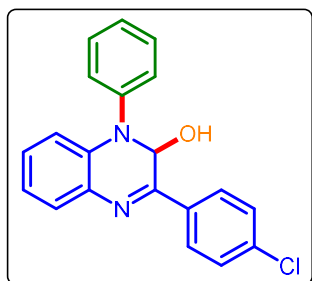

Yellow solid (93 mg, 79% yield); m.p. 147-148 °C.  $^1\text{H}$  NMR (500 MHz,  $\text{CDCl}_3$ )  $\delta$  8.05 (d,  $J = 8.5$  Hz, 2H), 7.61 (d,  $J = 8$  Hz, 1H), 7.55 (d,  $J = 7.5$  Hz, 2H), 7.46-7.41 (m, 4H), 7.30 (d,  $J = 7.5$  Hz, 1H), 7.15 (t,  $J = 7.5$  Hz, 1H), 7.02-6.98 (m, 2H), 6.01 (d,  $J = 9.5$  Hz, 1H), 2.98 (d,  $J = 10$  Hz, 1H).;  $^{13}\text{C}$   $\{^1\text{H}\}$  NMR (126 MHz,  $\text{CDCl}_3$ )  $\delta$  152.4, 143.3, 136.8, 134.6, 133.6, 132.4, 129.8, 129.1, 128.8, 128.7, 126.3, 125.4, 120.8, 115.9, 76.0. IR (neat,  $\text{cm}^{-1}$ ) 3066, 1588, 1489, 1333, 1166, 1011, 865, 677. HRMS (ESI)  $[\text{M} - \text{OH}]^+$  calcd for  $\text{C}_{20}\text{H}_{14}\text{ClN}_2^+$  317.0846, found 317.0923.

*3-(4-Bromophenyl)-1-phenyl-1,2-dihydroquinoxalin-2-ol (3ha)*

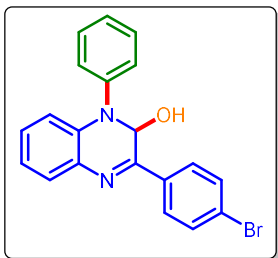

Yellow solid (110 mg, 83% yield); m.p. 155-163 °C.  $^1\text{H}$  NMR (500 MHz,  $\text{CDCl}_3$ )  $\delta$  7.84 (d,  $J = 8.5$  Hz, 2H), 7.54 (d,  $J = 7.5$  Hz, 2H), 7.49 (d,  $J = 8.5$  Hz, 2H), 7.42 (q,  $J = 8.0$  Hz, 3H), 7.28 (t,  $J = 7.5$  Hz, 1H), 7.07 (t,  $J = 7.3$  Hz, 1H), 6.94 (d,  $J = 8$  Hz, 1H), 6.81 (t,  $J = 7.5$  Hz, 1H), 5.93 (d,  $J = 10.5$  Hz, 1H), 3.89 (d,  $J = 10.5$  Hz, 1H).;  $^{13}\text{C}\{^1\text{H}\}$  NMR (126 MHz,  $\text{CDCl}_3$ )  $\delta$  152.1, 143.3, 134.7, 133.4, 132.3, 131.9, 129.7, 129.0, 128.7, 128.3, 126.3, 125.4, 125.4, 120.7, 115.6, 76.0. IR (neat,  $\text{cm}^{-1}$ ) 3189, 1586, 1488, 1393, 1318, 1248, 1071, 1005, 827, 748. HRMS (ESI)  $[\text{M} - \text{OH}]^+$  calcd for  $\text{C}_{20}\text{H}_{14}\text{BrN}_2^+$  361.0340, found 361.0342.

*1-Phenyl-3-(3-(trifluoromethyl)phenyl)-1,2-dihydroquinoxalin-2-ol (3ia)*

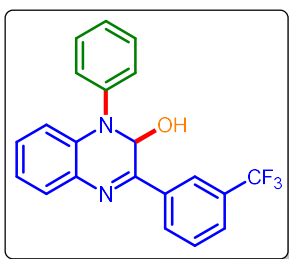

Yellow solid (99 mg, 77% yield); m.p. 127-130 °C.  $^1\text{H}$  NMR (500 MHz,  $\text{CDCl}_3$ )  $\delta$  8.38 (s, 1H), 8.28 (d,  $J = 8$  Hz, 1H), 7.69 (d,  $J = 8$  Hz, 1H), 7.65 (d,  $J = 7$  Hz, 1H), 7.59–7.55 (m, 3H), 7.46 (t,  $J = 7.7$  Hz, 2H), 7.31 (t,  $J = 7.3$  Hz, 1H), 7.17 (t,  $J = 7.6$  Hz, 1H), 7.01 (t,  $J = 7.5$  Hz, 2H), 6.04 (d,  $J = 10.5$  Hz, 1H), 2.99 (d,  $J = 10.6$  Hz, 1H).;  $^{13}\text{C}\{^1\text{H}\}$  NMR (126 MHz,  $\text{CDCl}_3$ )  $\delta$  151.8, 143.2, 136.9, 133.4, 132.5, 131.5, 131.3, 130.6, 129.8, 129.3, 129.1, 128.9, 127.0 (q,  $J = 3.7$  Hz), 126.5, 125.5, 124.4 (q,  $J = 3.8$  Hz), 120.9, 115.9, 76.0.  $^{19}\text{F}$  NMR (471 MHz,  $\text{CDCl}_3$ )  $\delta$  -62.62. IR (neat,  $\text{cm}^{-1}$ ) 3075, 1590, 1486, 1396, 1304, 1165, 1119, 978, 917, 799, 750, 694. HRMS (ESI)  $[\text{M} - \text{OH}]^+$  calcd for  $\text{C}_{21}\text{H}_{14}\text{F}_3\text{N}_2^+$  351.1109, found 351.1106.

*1-Phenyl-3-(m-tolyl)-1,2-dihydroquinoxalin-2-ol (3ja)*

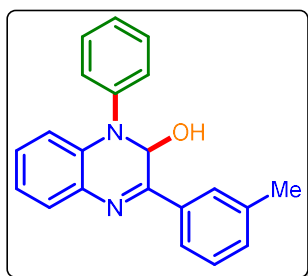

Yellow solid (88 mg, 80% yield); m.p. 90-93 °C.  $^1\text{H}$  NMR (500 MHz,  $\text{CDCl}_3$ )  $\delta$  7.84-7.82 (m, 2H), 7.54-7.50 (m, 3H), 7.41 (t,  $J = 7.7$  Hz, 2H), 7.29-7.24 (m, 2H), 7.20 (d,  $J = 7.5$  Hz, 1H), 7.06 (t,  $J = 7.5$  Hz, 1H), 6.94 (d,  $J = 8$  Hz, 1H), 6.89-6.85 (m, 1H), 6.00 (s, 1H), 3.67 (s, 1H), 2.36 (s, 3H).;  $^{13}\text{C}\{^1\text{H}\}$  NMR (126 MHz,  $\text{CDCl}_3$ )  $\delta$  153.7, 143.5,

138.3, 136.0, 133.8, 132.4, 131.4, 129.6, 128.6, 128.3, 128.2, 128.1, 126.0, 125.3, 124.8, 120.6, 115.7, 76.1, 21.6. IR (neat,  $\text{cm}^{-1}$ ) 3064, 2957, 1666, 1588, 1483, 1270, 1015, 954, 744, 693. HRMS (ESI)  $[\text{M} - \text{OH}]^+$  calcd for  $\text{C}_{21}\text{H}_{17}\text{N}_2^+$  297.1392, found 297.1390.

**3-(2-Fluorophenyl)-1-phenyl-1,2-dihydroquinoxalin-2-ol (3ka)**

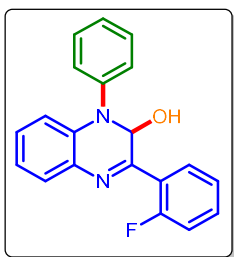

Yellow solid (73 mg, 64% yield); m.p. 140-145 °C.  $^1\text{H}$  NMR (500 MHz,  $\text{CDCl}_3$ )  $\delta$  8.12 (t,  $J = 7.5$  Hz, 1H), 7.67 (d,  $J = 7.5$  Hz, 1H), 7.54 (d,  $J = 8$  Hz, 2H), 7.44 (t,  $J = 8$  Hz, 3H), 7.30–7.26 (m, 2H), 7.19–7.11 (m, 2H), 7.03 (t,  $J = 7.5$  Hz, 2H), 6.06 (d,  $J = 5$  Hz, 1H), 2.81 (d,  $J = 6.5$  Hz, 1H);  $^{13}\text{C}\{^1\text{H}\}$  NMR (101 MHz,  $\text{CDCl}_3$ )  $\delta$  162.5, 160.0, 151.0 (d,  $J = 3.2$  Hz), 143.2, 133.8, 132.8, 132.1 (d,  $J = 8.9$  Hz), 131.4 (d,  $J = 2.9$  Hz), 129.7, 128.7, 128.7, 126.2, 125.3, 124.9 (d,  $J = 3.2$  Hz), 120.7, 116.6 (d,  $J = 23.4$  Hz), 115.8, 76.7.  $^{19}\text{F}$  NMR (376 MHz,  $\text{CDCl}_3$ )  $\delta$  -113.47. IR (neat,  $\text{cm}^{-1}$ ) 3129, 1587, 1486, 1447, 1332, 1227, 1097, 976, 744, 696. HRMS (ESI)  $[\text{M} + \text{H}]^+$  calcd for  $\text{C}_{20}\text{H}_{16}\text{FON}_2^+$  319.1241, found 319.1242.

**6,7-Dichloro-1,3-diphenyl-1,2-dihydroquinoxalin-2-ol (3la)**

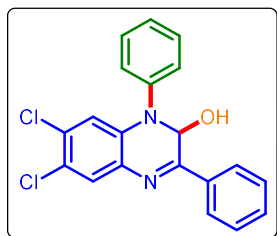

Yellow solid (106 mg, 82% yield); m.p. 175-185 °C.  $^1\text{H}$  NMR (400 MHz,  $\text{CDCl}_3$ )  $\delta$  7.92–7.90 (m, 2H), 7.54–7.46 (m, 5H), 7.40–7.30 (m, 4H), 6.97 (s, 1H), 5.97 (d,  $J = 10.4$  Hz, 1H), 4.18 (d,  $J = 10.0$  Hz, 1H);  $^{13}\text{C}\{^1\text{H}\}$  NMR (101 MHz,  $\text{CDCl}_3$ )  $\delta$  154.6, 142.6, 135.0, 132.7, 132.2, 132.0, 131.2, 130.1, 129.0, 128.9, 127.7, 127.1, 125.8, 123.3, 116.5, 75.8. IR (neat,  $\text{cm}^{-1}$ ) 3138, 1591, 1472, 1389, 1337, 1102, 975, 895, 701. HRMS (ESI)  $[\text{M} - \text{OH}]^+$  calcd for  $\text{C}_{20}\text{H}_{13}\text{Cl}_2\text{N}_2^+$  351.0456, found. 351.0446

**1-Phenyl-3-(thiophen-2-yl)-1,2-dihydroquinoxalin-2-ol (3ma)**

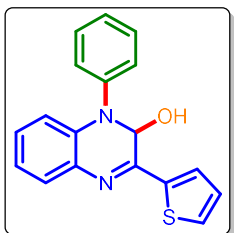

Yellow solid (74 mg, 69% yield); m.p. 140-143 °C.  $^1\text{H}$  NMR (400 MHz,  $\text{CDCl}_3$ )  $\delta$  7.62–7.60 (m, 2H), 7.57–7.54 (m, 2H), 7.49 (d,  $J = 5.0$  Hz, 1H), 7.45 (t,  $J = 7.9$  Hz, 2H), 7.31 (d,  $J = 7.6$  Hz, 1H), 7.15–

7.10 (m, 2H), 7.03–6.98 (m, 2H), 6.06 (s, 1H), 2.79 (s, 1H).;  $^{13}\text{C}\{^1\text{H}\}$  NMR (126 MHz,  $\text{CDCl}_3$ )  $\delta$  149.4, 143.4, 142.9, 133.6, 132.6, 130.4, 129.8, 128.4, 128.3, 128.2, 128.1, 126.3, 125.4, 120.9, 115.9, 76.4. IR (neat,  $\text{cm}^{-1}$ ) 3065, 1661, 1588, 1486, 1422, 1281, 1003, 938, 852, 742. HRMS (ESI)  $[\text{M} - \text{OH}]^+$  calcd for  $\text{C}_{18}\text{H}_{13}\text{N}_2\text{S}^+$  289.0799, found 289.0789 .

*3-(Benzo[d][1,3]dioxol-5-yl)-1-phenyl-1,2-dihydroquinoxalin-2-ol (3na)*

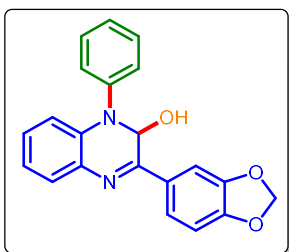

Yellow solid (49 mg, 41% yield); m.p. 138 -141 °C.  $^1\text{H}$  NMR (500 MHz,  $\text{CDCl}_3$ )  $\delta$  7.71 (s, 1H), 7.63–7.60 (m, 2H), 7.55 (d,  $J = 7.5$  Hz, 2H), 7.44 (t,  $J = 7.7$  Hz, 2H), 7.29 (d,  $J = 7.5$  Hz, 1H), 7.14 (t,  $J = 7.7$  Hz, 1H), 7.02 (d,  $J = 7.5$  Hz, 2H), 6.87 (d,  $J = 8.5$  Hz, 1H), 6.03 (d,  $J = 2.5$  Hz, 2H), 5.99 (d,  $J = 17$  Hz, 1H), 2.76 (d,  $J = 10.5$  Hz, 1H).;  $^{13}\text{C}\{^1\text{H}\}$  NMR (101 MHz,  $\text{CDCl}_3$ )  $\delta$  153.0, 150.0, 148.4, 143.5, 133.7, 132.2, 130.7, 129.7, 128.3, 128.1, 126.1, 125.2, 122.5, 120.8, 115.8, 108.3, 107.6, 101.7, 76.1. IR (neat,  $\text{cm}^{-1}$ ) 3067, 1591, 1485, 1444, 1236, 1097, 1034, 933, 746, 696. HRMS (ESI)  $[\text{M} - \text{OH}]^+$  calcd for  $\text{C}_{21}\text{H}_{15}\text{N}_2\text{O}_2^+$  327.1134, found 327.1128.

*1-(4-Methoxyphenyl)-3-phenyl-1,2-dihydroquinoxalin-2-ol (3ab)*

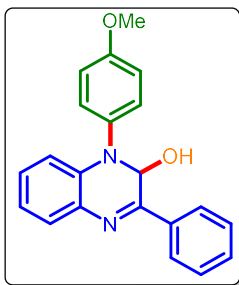

Yellow solid (93mg, 80% yield); m.p. 169-172 °C.  $^1\text{H}$  NMR (500 MHz,  $\text{CDCl}_3$ )  $\delta$  8.13–8.11 (m, 2H), 7.65 (d,  $J = 8$  Hz, 1H), 7.47-7.45 (m, 5H), 7.14 (t,  $J = 7.5$  Hz, 1H), 7.00–6.97 (m, 3H), 6.85 (d,  $J = 8.5$  Hz, 1H), 6.02 (d,  $J = 6$  Hz, 1H), 3.86 (s, 3H), 2.78 (d,  $J = 9.5$  Hz, 1H).;  $^{13}\text{C}\{^1\text{H}\}$  NMR (126 MHz,  $\text{CDCl}_3$ )  $\delta$  158.3, 153.2, 136.3, 136.2, 133.4, 133.3, 130.6, 128.9, 128.8, 128.5, 127.7, 127.5, 120.2, 115.4, 115.0, 76.3, 55.7. IR (neat,  $\text{cm}^{-1}$ ) 3118, 2935, 1590, 1483, 1326, 1253, 1048, 1024, 1000, 751, 693. HRMS (ESI)  $[\text{M} - \text{OH}]^+$  calcd for  $\text{C}_{21}\text{H}_{17}\text{N}_2\text{O}^+$  313.1341, found 313.1340.

*3-Phenyl-1-(p-tolyl)-1,2-dihydroquinoxalin-2-ol (3ac)*

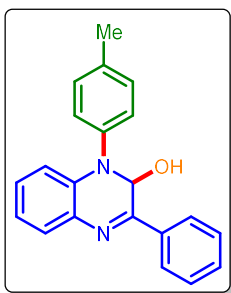

Yellow solid (86 mg, 78% yield); m.p. 150-155 °C.  $^1\text{H}$  NMR (400 MHz,  $\text{CDCl}_3$ )  $\delta$  8.02–8.00 (m, 2H), 7.50 (dd,  $J = 9.7, 1.7$  Hz, 1H), 7.43–7.35 (m, 5H), 7.22 (d,  $J = 10$  Hz, 2H), 7.09–7.04 (m, 1H), 6.90 (dd,  $J = 10.5, 1.5$  Hz, 1H), 6.88–6.84 (m, 1H), 5.98 (d,  $J = 9$  Hz, 1H), 3.54 (d,  $J = 10$  Hz, 1H), 2.38 (s, 3H).;  $^{13}\text{C}\{^1\text{H}\}$  NMR (101 MHz,  $\text{CDCl}_3$ )  $\delta$  153.1, 140.8, 136.1, 136.0, 133.5, 132.7, 130.5, 130.2, 128.7, 128.4, 128.3, 127.5, 125.5, 120.3, 115.5, 76.2, 21.2. IR (neat,  $\text{cm}^{-1}$ ) 3122, 1606, 1510, 1483, 1340, 1283, 1019, 970, 824, 750, 690. HRMS (ESI)  $[\text{M} - \text{OH}]^+$  calcd for  $\text{C}_{21}\text{H}_{17}\text{N}_2^+$  297.1392, found 297.1396.

*1-(4-(Tert-butyl)phenyl)-3-phenyl-1,2-dihydroquinoxalin-2-ol (3ad)*

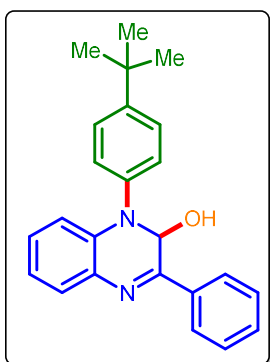

Yellow solid (95 mg, 76% yield); m.p. 70-75 °C.  $^1\text{H}$  NMR (500 MHz,  $\text{CDCl}_3$ )  $\delta$  8.02-8.00 (m, 2H), 7.52 (d,  $J = 7.9$  Hz, 1H), 7.43 (q,  $J = 8.5$  Hz, 5H), 7.39–7.35 (m, 2H), 7.07 (t,  $J = 7.5$  Hz, 1H), 6.96 (d,  $J = 8$  Hz, 1H), 6.86 (t,  $J = 7.5$  Hz, 1H), 6.00 (s, 1H), 3.59 (s, 1H), 1.35 (s, 9H).;  $^{13}\text{C}\{^1\text{H}\}$  NMR (101 MHz,  $\text{CDCl}_3$ )  $\delta$  153.2, 149.2, 140.7, 136.0, 133.5, 132.6, 130.5, 128.7, 128.33, 128.31, 127.5, 126.5, 125.0, 120.3, 115.7, 76.1, 34.7, 31.5. IR (neat,  $\text{cm}^{-1}$ ) 3517, 2955, 1602, 1510, 1479, 1371, 1265, 954, 748, 691. HRMS (ESI)  $[\text{M} - \text{OH}]^+$  calcd for  $\text{C}_{24}\text{H}_{23}\text{N}_2^+$  339.1861, found 339.1863.

*1-(4-Fluorophenyl)-3-phenyl-1,2-dihydroquinoxalin-2-ol (3ae)*

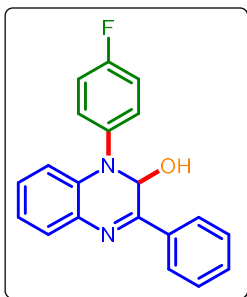

Yellow solid (76 mg, 68% yield); m.p. 153-155 °C.  $^1\text{H}$  NMR (500 MHz,  $\text{CDCl}_3$ )  $\delta$  8.09-8.07 (m, 2H), 7.60 (d,  $J = 7.5$  Hz, 1H), 7.53-7.51 (m, 2H), 7.45–7.43 (m, 3H), 7.13 (t,  $J = 8.25$  Hz, 3H), 6.97 (t,  $J = 7.5$  Hz, 1H), 6.86 (d,  $J = 8$  Hz, 1H), 5.98 (d,  $J = 10.5$  Hz, 1H), 3.09 (d,  $J = 10.5$  Hz, 1H).;  $^{13}\text{C}\{^1\text{H}\}$  NMR (126 MHz,  $\text{CDCl}_3$ )  $\delta$  162.0, 160.1, 153.5, 139.4 (d,  $J = 3.0$  Hz), 136.0, 133.5, 132.7, 130.7, 128.9, 128.7

(d,  $J = 14.6$  Hz), 127.7 (d,  $J = 8.3$  Hz), 127.5, 120.7, 116.6 (d,  $J = 22.6$  Hz), 115.3, 76.2.  $^{19}\text{F}$  NMR (471 MHz,  $\text{CDCl}_3$ )  $\delta$  -120.20. IR (neat,  $\text{cm}^{-1}$ ) 3074, 1611, 1502, 1338, 1288, 1158, 1104, 974, 836, 750, 695. HRMS (ESI)  $[\text{M} - \text{OH}]^+$  calcd for  $\text{C}_{20}\text{H}_{14}\text{FN}_2^+$  301.1141, found 301.1144.

*1-(4-Chlorophenyl)-3-phenyl-1,2-dihydroquinoxalin-2-ol (3af)*

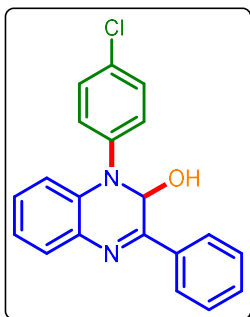

Yellow solid (79 mg, 68% yield); m.p. 160-162 °C.  $^1\text{H}$  NMR (400 MHz,  $\text{CDCl}_3$ )  $\delta$  8.13–8.11 (m, 2H), 7.66 (dd,  $J = 7.6, 1.6$  Hz, 1H), 7.50 (d,  $J = 8.8$  Hz, 2H), 7.48–7.46 (m, 3H), 7.40 (d,  $J = 8.8$  Hz, 2H), 7.19–7.14 (m, 1H), 7.04 (td,  $J = 7.5, 1.3$  Hz, 1H), 7.00–6.98 (dd,  $J = 8.2, 1.2$  Hz, 1H), 6.00 (d,  $J = 10$  Hz, 1H), 2.88 (d,  $J = 10.8$  Hz, 1H).;  $^{13}\text{C}\{^1\text{H}\}$  NMR (126 MHz,  $\text{CDCl}_3$ )  $\delta$  153.8, 142.0, 136.0, 133.8, 132.1, 131.6, 130.8, 129.9, 128.9, 128.8, 128.6, 127.5, 126.5, 121.1, 115.7, 75.9. IR (neat,  $\text{cm}^{-1}$ ) 3065, 1589, 1486, 1091, 1017, 976, 831, 749, 692. HRMS (ESI)  $[\text{M} - \text{OH}]^+$  calcd for  $\text{C}_{20}\text{H}_{14}\text{ClN}_2^+$  317.0846, found 317.0844.

*1-(4-Bromophenyl)-3-phenyl-1,2-dihydroquinoxalin-2-ol (3ag)*

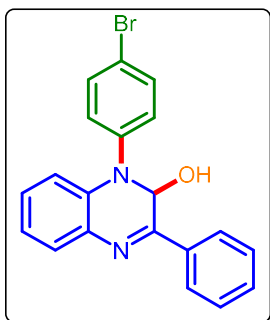

Yellow solid (99 mg, 75% yield); m.p. 145-47 °C.  $^1\text{H}$  NMR (500 MHz,  $\text{CDCl}_3$ )  $\delta$  8.12-8.10 (m, 2H), 7.65 (d,  $J = 7.5$  Hz, 1H), 7.55 (d,  $J = 8.5$  Hz, 2H), 7.47–7.44 (m, 5H), 7.16 (t,  $J = 7.5$  Hz, 1H), 7.03 (t,  $J = 7.5$  Hz, 1H), 7.00 (d,  $J = 8$  Hz, 1H), 6.00 (d,  $J = 10.5$  Hz, 1H), 2.89 (d,  $J = 10.5$  Hz, 1H).;  $^{13}\text{C}\{^1\text{H}\}$  NMR (126 MHz,  $\text{CDCl}_3$ )  $\delta$  153.8, 142.5, 136.0, 133.9, 132.8, 131.9, 130.8, 128.9, 128.8, 128.6, 127.5, 126.8, 121.2, 119.3, 115.7, 75.9. IR (neat,  $\text{cm}^{-1}$ ) 3063, 1611, 1489, 1338, 1283, 1075, 977, 828, 749. HRMS (ESI)  $[\text{M} - \text{OH}]^+$  calcd for  $\text{C}_{20}\text{H}_{14}\text{BrN}_2^+$  361.0340, found 361.0343.

*3-Phenyl-1-(m-tolyl)-1,2-dihydroquinoxalin-2-ol (3ah)*

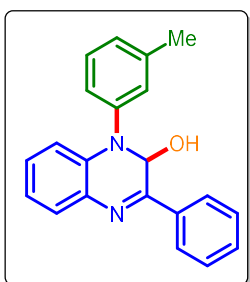

Yellow solid (87 mg, 79% yield); m.p. 90-95 °C.  $^1\text{H}$  NMR (500 MHz,  $\text{CDCl}_3$ )  $\delta$  8.11–8.10 (m, 2H), 7.63 (dd,  $J = 8, 1.5$  Hz, 1H), 7.45–7.43

(m, 3H), 7.38 (s, 1H), 7.35–7.29 (m, 2H), 7.14 (t,  $J = 7.5$  Hz, 1H), 7.09 (d,  $J = 7.0$  Hz, 1H), 7.03–6.97 (m, 2H), 6.05 (d,  $J = 10$  Hz, 1H), 2.98 (d,  $J = 10.5$  Hz, 1H), 2.39 (s, 3H).;  $^{13}\text{C}\{^1\text{H}\}$  NMR (126 MHz,  $\text{CDCl}_3$ )  $\delta$  153.5, 143.4, 139.8, 136.2, 133.7, 132.5, 130.6, 129.5, 128.8, 128.6, 128.4, 127.5, 127.0, 125.9, 122.4, 120.6, 116.0, 76.1, 21.6. IR (neat,  $\text{cm}^{-1}$ ) 3056, 1596, 1482, 1330, 1177, 1018, 965, 692. HRMS (ESI)  $[\text{M} - \text{OH}]^+$  calcd for  $\text{C}_{21}\text{H}_{17}\text{N}_2^+$  297.1392, found 297.1393.

*1-(4-Methoxy-3-methylphenyl)-3-phenyl-1,2-dihydroquinoxalin-2-ol (3ai)*

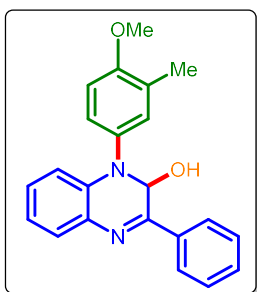

Yellow solid (98 mg, 81% yield); m.p. 152–156 °C.  $^1\text{H}$  NMR (500 MHz,  $\text{CDCl}_3$ )  $\delta$  8.12–8.10 (m, 2H), 7.63 (d,  $J = 7.5$  Hz, 1H), 7.46–7.44 (m, 3H), 7.34–7.31 (m, 2H), 7.13 (t,  $J = 7.5$  Hz, 1H), 6.96 (t,  $J = 7.3$  Hz, 1H), 6.87 (t,  $J = 8$  Hz, 2H), 6.02 (d,  $J = 9$  Hz, 1H), 3.87 (s, 3H), 2.88 (d,  $J = 10.0$  Hz, 1H), 2.25 (s, 3H).;  $^{13}\text{C}\{^1\text{H}\}$  NMR (101 MHz,  $\text{CDCl}_3$ )  $\delta$  156.5, 153.0, 136.2, 135.7, 133.4, 133.2, 130.5, 128.8, 128.6, 128.5, 128.1, 127.5, 124.8, 120.0, 115.4, 110.7, 76.4, 55.7, 16.5. IR (neat,  $\text{cm}^{-1}$ ) 3341, 2922, 1605, 1498, 1459, 1231, 1101, 1022, 940, 749. HRMS (ESI)  $[\text{M} - \text{OH}]^+$  calcd for  $\text{C}_{22}\text{H}_{19}\text{N}_2\text{O}^+$  327.1497, found 327.1488.

*1-(Naphthalen-2-yl)-3-phenyl-1,2-dihydroquinoxalin-2-ol (3aj)*

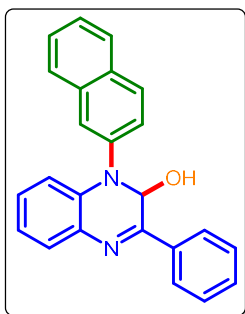

Yellow solid (83 mg, 68% yield); m.p. 148–151 °C.  $^1\text{H}$  NMR (500 MHz,  $\text{CDCl}_3$ )  $\delta$  8.18–8.16 (m, 2H), 8.11 (s, 1H), 7.87 (t,  $J = 8$  Hz, 3H), 7.70 (d,  $J = 7.5$  Hz, 1H), 7.57 (d,  $J = 8.5$  Hz, 1H), 7.53 (t,  $J = 7$  Hz, 1H), 7.51–7.46 (m, 4H), 7.17 (t,  $J = 7.5$  Hz, 1H), 7.09–7.05 (m, 2H), 6.20 (d,  $J = 10$  Hz, 1H), 2.92 (d,  $J = 10.5$  Hz, 1H).;  $^{13}\text{C}\{^1\text{H}\}$  NMR (126 MHz,  $\text{CDCl}_3$ )  $\delta$  153.8, 141.1, 136.1, 134.4, 134.0, 132.2, 131.7, 130.7, 129.2, 128.9, 128.8, 128.5, 127.9, 127.5, 126.9, 126.0, 124.3, 122.2, 121.1, 116.1, 76.4. IR (neat,  $\text{cm}^{-1}$ ) 3072, 1576, 1451, 1319,



1168, 1027, 958, 638. HRMS (ESI)  $[M - OH]^+$  calcd for  $C_{24}H_{17}N_2^+$  333.1392, found 333.1390.

*(1S,2R,5S)-2-Isopropyl-5-methylcyclohexyl 4-((S)-3-hydroxy-4-phenyl-3,4-dihydroquinoxalin-2-yl)benzoate (30a)*

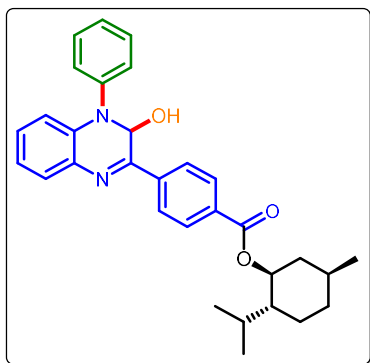

Yellow solid (137 mg, 81% yield); m.p. 156-158 °C.  $^1H$  NMR (500 MHz,  $CDCl_3$ )  $\delta$  8.11 (t,  $J = 8.5$  Hz, 2H), 8.05 (t,  $J = 8.0$  Hz, 2H), 7.58–7.52 (m, 3H), 7.42 (t,  $J = 7.0$  Hz, 2H), 7.28 (t,  $J = 7.7$  Hz, 1H), 7.13–7.08 (m, 1H), 6.96–6.90 (m, 2H), 6.0–6.00 (m, 1H), 4.97–4.91 (m, 1H), 3.75–3.50 (m, 1H), 2.16–2.13 (m, 1H), 1.98–1.92 (m, 1H), 1.80–1.71 (m, 3H), 1.60–1.55 (m, 2H), 1.18–1.09 (m, 2H), 0.93 (t,  $J = 7.2$  Hz, 6H), 0.80 (dd,  $J = 7.2, 3.7$  Hz, 3H).;  $^{13}C\{^1H\}$  NMR (126 MHz,  $CDCl_3$ )  $\delta$  165.9, 165.8, 152.4, 152.3, 143.25, 139.82, 139.77, 133.5, 132.61, 132.55, 132.22, 132.19, 129.92, 129.91, 129.7, 128.9, 128.8, 128.7, 127.39, 127.38, 126.3, 125.4, 120.7, 115.81, 115.77, 75.97, 75.90, 75.37, 75.35, 47.39, 41.06, 34.4, 31.6, 26.8, 26.7, 23.94, 23.85, 22.2, 20.87, 20.84, 16.82, 16.73. IR (neat,  $cm^{-1}$ ) 3339, 2912, 1655, 1478, 1454, 1222, 1214, 1007, 950, 782. HRMS (ESI)  $[M - OH]^+$  calcd for  $C_{31}H_{33}N_2O_2^+$  465.2542, found 465.2471.

*(4R)-1,7,7-Trimethylbicyclo[2.2.1]heptan-2-yl 4-((S)-3-hydroxy-4-phenyl-3,4-dihydroquinoxalin-2-yl)benzoate (3pa)*

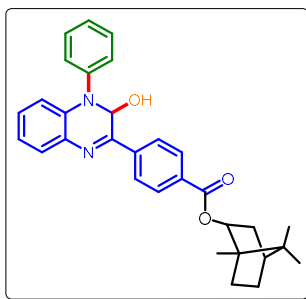

Yellow solid (126 mg, 75% yield); m.p. 154-158 °C.  $^1H$  NMR (500 MHz,  $CDCl_3$ )  $\delta$  8.15–8.12 (m, 2H), 8.08–8.06 (m, 2H), 7.60–7.57 (m, 1H), 7.55 (d,  $J = 8$  Hz, 2H), 7.44 (t,  $J = 7.8$  Hz, 2H), 7.28 (t,  $J = 7.3$  Hz, 1H), 7.13 (t,  $J = 7.5$  Hz, 1H), 6.98–6.94 (m, 2H), 6.03 (d,  $J = 8$  Hz, 1H), 5.14–5.10 (m, 1H), 3.47 (s, 1H), 2.51–2.45 (m, 1H), 2.16–.10 (m, 1H), 1.85–1.78 (m, 1H), 1.75 (t,  $J = 4.5$  Hz, 1H), 1.46–1.39 (m, 1H), 1.36–1.31 (m, 1H), 1.14 (dd,  $J = 13.5, 3.5$  Hz, 1H), 0.97 (s,

3H), 0.92 (s, 6H).;  $^{13}\text{C}\{^1\text{H}\}$  NMR (126 MHz,  $\text{CDCl}_3$ )  $\delta$  166.6, 152.36, 152.32, 143.3, 139.89, 139.87, 133.6, 132.59, 132.58, 132.29, 132.26, 129.88, 129.75, 128.97, 128.83, 127.4, 126.3, 125.4, 120.8, 115.8, 81.0, 75.97, 75.96, 49.3, 48.0, 45.2, 37.0, 37.0, 28.2, 27.6, 19.9, 19.1, 13.8. IR (neat,  $\text{cm}^{-1}$ ) 3439, 2913, 1675, 1454, 1426, 1208, 1157, 1009, 850, 672. HRMS (ESI)  $[\text{M} - \text{OH}]^+$  calcd for  $\text{C}_{31}\text{H}_{31}\text{N}_2\text{O}_2^+$  463.2386, found 463.2390.

*(8R,9S,13S,14S)-13-Methyl-17-oxo-7,8,9,11,12,13,14,15,16,17-decahydro-6H-cyclopenta[a]phenanthren-3-yl 4-((S)-3-hydroxy-4-phenyl-3,4-dihydroquinoxalin-2-yl)benzoate (3qa)*

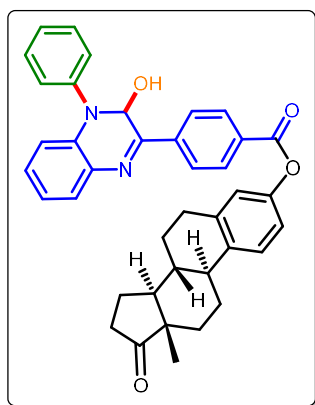

Yellow solid (86 mg, 41% yield); m.p. 140-146 °C.  $^1\text{H}$  NMR (500 MHz,  $\text{CDCl}_3$ )  $\delta$  8.59 (d,  $J = 8$  Hz, 1H), 8.40–8.35 (m, 2H), 8.27 (d,  $J = 8$  Hz, 1H), 8.19 (dd,  $J = 19.5, 8.0$  Hz, 1H), 8.12 (d,  $J = 8.0$  Hz, 1H), 7.85–7.98 (m, 1H), 7.72 (d,  $J = 8$  Hz, 1H), 7.66 (t,  $J = 7.5$  Hz, 1H), 7.54 (d,  $J = 7.5$  Hz, 1H), 7.40–7.31 (m, 6H), 6.99 (d,  $J = 10.5$  Hz, 1H), 4.16 (d,  $J = 5.5$  Hz, 1H), 2.98–.93 (m, 3H), 2.36–2.29 (m, 3H), 2.08–1.98 (m, 6H), 1.26 (s, 3H), 0.94 (d,  $J = 3$  Hz, 1H), 0.88 (t,  $J = 6.5$  Hz, 2H).;  $^{13}\text{C}\{^1\text{H}\}$  NMR (126 MHz,  $\text{CDCl}_3$ )  $\delta$  143.3, 131.1, 130.8, 130.6, 130.4, 130.3, 130.2, 129.98, 129.91, 129.7, 129.4, 129.1, 128.4, 127.8, 127.6, 126.7, 121.8, 120.3, 119.0, 115.7, 110.8, 77.4, 50.7, 48.1, 44.4, 38.2, 36.0, 29.8, 26.5, 25.96, 22.8, 21.8, 14.3, 14.0. IR (neat,  $\text{cm}^{-1}$ ) 3349, 2930, 1657, 1480, 1447, 1209, 1201, 1021, 869, 632. HRMS (ESI)  $[\text{M} - \text{OH}]^+$  calcd for  $\text{C}_{39}\text{H}_{35}\text{N}_2\text{O}_3^+$  579.2648, found 579.2664.

*2-Phenylisoquinolin-2-ium trifluoromethanesulfonate (7')*

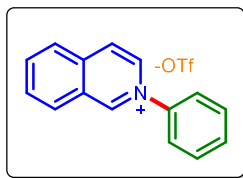

brown gummy solid (100 mg, 81% yield);  $^1\text{H}$  NMR (400 MHz,  $\text{DMSO-d}_6$ )  $\delta$  10.30 (s, 1H), 8.97 (dd,  $J = 6.8, 1.6$  Hz, 1H), 8.65 (d,  $J = 6.8$  Hz, 1H), 8.54 (d,  $J = 8.8$  Hz, 1H), 8.37 (d,  $J = 8.4$  Hz, 1H), 8.29–8.24 (m, 1H), 8.09–.05 (m, 1H), 7.93–7.90 (m, 2H), 7.74–7.68 (m, 3H).;  $^{13}\text{C}\{^1\text{H}\}$  NMR (101 MHz,  $\text{DMSO-d}_6$ )  $\delta$  150.5, 143.0, 137.7,

137.3, 135.0, 131.5, 131.2, 131.1, 130.3, 127.4, 127.3, 125.8, 125.0.  $^{19}\text{F}$  NMR (471 MHz, DMSO)  $\delta$  -78.10. IR (neat,  $\text{cm}^{-1}$ ) 3229, 2940, 1690, 1468, 1432, 1278, 1211, 1001, 859, 659. HRMS (ESI)  $[\text{M} - \text{OTf}]^+$  calcd for  $\text{C}_{15}\text{H}_{12}\text{N}^+$  206.0964, found 206.1009.

### 2-Phenylquinoline (8')

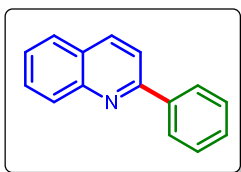

White solid (47 mg, 66% yield); m.p. 120-125 °C.  $^1\text{H}$  NMR (600 MHz,  $\text{CDCl}_3$ )  $\delta$  8.23 (d,  $J = 8.4$  Hz, 1H), 8.19–8.16 (m, 3H), 7.88 (d,  $J = 9$  Hz, 1H), 7.83 (d,  $J = 8.4$  Hz, 1H), 7.73 (t,  $J = 7.8$  Hz, 1H), 7.55–7.52 (m, 3H), 7.47 (t,  $J = 7.6$  Hz, 1H).;  $^{13}\text{C}\{^1\text{H}\}$  NMR (151 MHz,  $\text{CDCl}_3$ )  $\delta$  157.5, 148.4, 139.9, 136.9, 129.9, 129.8, 129.5, 129.0, 127.7, 127.6, 127.3, 126.4, 119.2. IR (neat,  $\text{cm}^{-1}$ ) 3269, 2953, 1645, 1459, 1427, 1269, 1219, 1091, 779, 619. HRMS (ESI)  $[\text{M} + \text{H}]^+$  calcd for  $\text{C}_{15}\text{H}_{12}\text{N}^+$  206.0964, found 206.1009.

### 5-Methyl-1,3-diphenyl-1H-benzo[d]imidazol-3-ium trifluoromethanesulfonate (10aa)

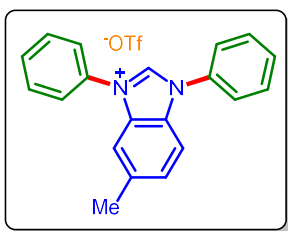

White solid (97 mg, 64% yield); m.p. 151-155 °C.  $^1\text{H}$  NMR (500 MHz,  $\text{DMSO-d}_6$ )  $\delta$  10.38 (s, 1H), 7.85–7.82 (m, 4H), 7.73 (d,  $J = 8.5$  Hz, 1H), 7.72–7.68 (m, 4H), 7.66–7.64 (m, 2H), 7.52 (d,  $J = 9.5$  Hz, 1H), 6.46 (s, 1H), 2.44 (s, 3H).;  $^{13}\text{C}\{^1\text{H}\}$  NMR (126 MHz,  $\text{DMSO-d}_6$ )  $\delta$  142.3, 138.4, 133.13, 133.08, 131.5, 130.7, 130.459, 130.456, 129.4, 129.2, 125.5, 125.3, 113.4, 113.2, 21.1.  $^{19}\text{F}$  NMR (471 MHz,  $\text{DMSO-d}_6$ )  $\delta$  -78.20. IR (neat,  $\text{cm}^{-1}$ ) 3139, 1570, 1289, 1219, 1119, 1104, 1021, 1001, 858, 720. HRMS (ESI)  $[\text{M} - \text{OTf}]^+$  calcd for  $\text{C}_{20}\text{H}_{17}\text{N}_2^+$  285.1392, found 285.1389.

### 5-Chloro-1,3-diphenyl-1H-benzo[d]imidazol-3-ium trifluoromethanesulfonate (10ba)

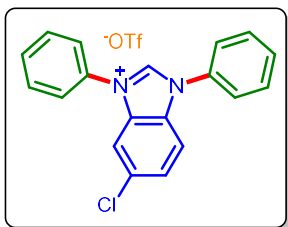

White solid (92 mg, 58% yield); m.p. 149-156 °C.  $^1\text{H}$  NMR (500 MHz,  $\text{DMSO-d}_6$ )  $\delta$  10.56 (s, 1H), 8.02 (d,  $J = 1.5$  Hz, 1H), 7.92 (d,  $J = 9.0$  Hz, 1H), 7.90–7.86 (m, 3H), 7.78–7.70 (m, 7H), 6.47 (s, 1H).;  $^{13}\text{C}\{^1\text{H}\}$  NMR (126 MHz,  $\text{DMSO-d}_6$ )  $\delta$  143.9, 132.72, 132.66, 132.4,

132.0, 130.9, 130.8, 130.5, 130.2, 128.2, 125.4, 125.3, 115.5, 113.7.  $^{19}\text{F}$  NMR (471 MHz, DMSO- $d_6$ )  $\delta$  -72.99. IR (neat,  $\text{cm}^{-1}$ ) 3138, 1579, 1248, 1211, 1169, 1144, 1023, 1007, 813, 758. HRMS (ESI)  $[\text{M} - \text{OTf}]^+$  calcd for  $\text{C}_{19}\text{H}_{14}\text{ClN}_2^+$  305.0846, found 305.0869.

*1,3-Diphenyl-1H-imidazol-3-ium trifluoromethanesulfonate (10ca)*

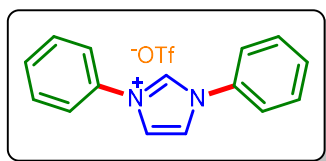

White solid (88 mg, 68% yield); m.p. 153-157 °C.  $^1\text{H}$  NMR (400 MHz, DMSO- $d_6$ )  $\delta$  10.28 (t,  $J = 1.7$  Hz, 1H), 8.52 (d,  $J = 1.6$  Hz, 2H), 7.88–7.85 (m, 4H), 7.68–7.63 (m, 4H), 7.60–7.55 (m, 2H).;  $^{13}\text{C}\{^1\text{H}\}$  NMR (101 MHz, DMSO- $d_6$ )  $\delta$  134.7, 134.6, 130.2, 130.1, 122.1, 122.0.  $^{19}\text{F}$  NMR (471 MHz, DMSO- $d_6$ )  $\delta$  -77.97. IR (neat,  $\text{cm}^{-1}$ ) 3128, 1552, 1285, 1257, 1147, 1120, 1067, 1060, 849, 755. HRMS (ESI)  $[\text{M} - \text{OTf}]^+$  calcd for  $\text{C}_{15}\text{H}_{13}\text{N}_2^+$  221.1079, found 221.1091.

*3-Phenyl-1-vinyl-1H-imidazol-3-ium trifluoromethanesulfonate (10da)*

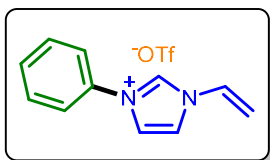

Brown liquid (89 mg, 79% yield);  $^1\text{H}$  NMR (500 MHz, DMSO- $d_6$ )  $\delta$  9.97 (s, 1H), 8.33 (dt,  $J = 18, 2.0$  Hz, 2H), 7.74–7.72 (m, 2H), 7.59 (t,  $J = 7.8$  Hz, 2H), 7.54–7.51 (m, 1H), 7.23 (dd,  $J = 15.5, 9$  Hz, 1H), 6.01 (dd,  $J = 15.7, 2.4$  Hz, 1H), 5.46 (dd,  $J = 9, 2.5$  Hz, 1H).;  $^{13}\text{C}\{^1\text{H}\}$  NMR (101 MHz, DMSO- $d_6$ )  $\delta$  134.6, 134.5, 130.2, 130.1, 128.8, 122.03, 121.99, 120.1, 109.8.  $^{19}\text{F}$  NMR (471 MHz, DMSO- $d_6$ )  $\delta$  -78.03. IR (neat,  $\text{cm}^{-1}$ ) 3133, 1559, 1228, 1217, 1148, 1146, 1053, 1018, 859, 756. HRMS (ESI)  $[\text{M} - \text{OTf}]^+$  calcd for  $\text{C}_{11}\text{H}_{11}\text{N}_2^+$  171.0922, found 171.0948.

*1,3-Di(naphthalen-2-yl)-1H-imidazol-3-ium trifluoromethanesulfonate (10cj)*

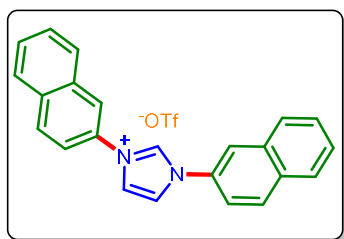

Light brown solid (112 mg, 68% yield); m.p. 146-148 °C.  $^1\text{H}$  NMR (500 MHz, DMSO- $d_6$ )  $\delta$  10.57 (s, 1H), 8.74–8.72 (m, 2H), 8.55-8.54 (m, 2H), 8.28 (d,  $J = 8.5$  Hz, 2H), 8.11–8.05 (m, 6H), 7.73–7.67 (m, 4H).;  $^{13}\text{C}\{^1\text{H}\}$  NMR (126 MHz, DMSO- $d_6$ )  $\delta$  134.9, 132.8, 132.5, 132.1, 130.3, 128.2, 128.01, 127.97, 127.78, 122.1, 120.5, 119.7.  $^{19}\text{F}$

NMR (471 MHz, DMSO- $d_6$ )  $\delta$  -77.76. IR (neat,  $\text{cm}^{-1}$ ) 3123, 1558, 1229, 1221, 1138, 1131, 1051, 1011, 852, 746. HRMS (ESI)  $[\text{M} - \text{OTf}]^+$  calcd for  $\text{C}_{23}\text{H}_{17}\text{N}_2^+$  321.1392, found.

*1,3-bis(4-Methoxyphenyl)-1H-imidazol-3-ium trifluoromethanesulfonate (10cb)*

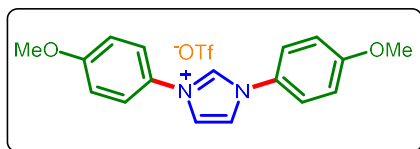

Light brown solid (99 mg, 66% yield); m.p. 145-149 °C.  $^1\text{H}$  NMR (500 MHz, DMSO- $d_6$ )  $\delta$  10.05 (s, 1H), 8.36 (d,  $J = 2$  Hz, 2H), 7.73 (d,  $J = 9.0$  Hz, 4H), 7.15 (d,  $J = 9.0$  Hz, 4H), 3.77 (s, 6H).;  $^{13}\text{C}\{^1\text{H}\}$  NMR (126 MHz, DMSO- $d_6$ )  $\delta$  160.2, 133.9, 127.8, 123.7, 122.0, 115.2, 55.8.  $^{19}\text{F}$  NMR (471 MHz, DMSO- $d_6$ )  $\delta$  -77.75. IR (neat,  $\text{cm}^{-1}$ ) 3123, 1561, 1227, 1216, 1149, 1143, 1042, 1017, 852, 750. HRMS (ESI)  $[\text{M} - \text{OTf}]^+$  calcd for  $\text{C}_{17}\text{H}_{17}\text{N}_2\text{O}_2^+$  281.1290, found 281.1315.

*1,3-bis(4-Chlorophenyl)-1H-imidazol-3-ium trifluoromethanesulfonate (10cf)*

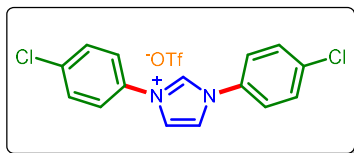

Light brown solid (104 mg, 68% yield); m.p. 150-153 °C.  $^1\text{H}$  NMR (500 MHz, DMSO- $d_6$ )  $\delta$  10.38 (s, 1H), 8.53 (d,  $J = 1.6$  Hz, 2H), 7.92 (d,  $J = 8.8$  Hz, 4H), 7.76 (d,  $J = 8.8$  Hz, 4H).;  $^{13}\text{C}\{^1\text{H}\}$  NMR (126 MHz, DMSO- $d_6$ )  $\delta$  135.1, 134.7, 133.5, 130.2, 124.0, 122.0.  $^{19}\text{F}$  NMR (471 MHz, DMSO- $d_6$ )  $\delta$  -77.76. IR (neat,  $\text{cm}^{-1}$ ) 3133, 1569, 1247, 1213, 1149, 1147, 1023, 1017, 812, 759. HRMS (ESI)  $[\text{M} - \text{OTf}]^+$  calcd for  $\text{C}_{15}\text{H}_{11}\text{Cl}_2\text{N}_2^+$  289.0299, found 289.0356.

*1,3-Diphenylquinoxalin-2(1H)-one (11)*

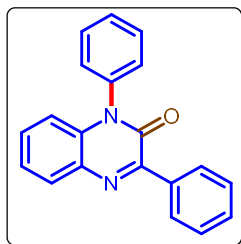

White solid (47 mg, 79% yield); m.p. 180-185 °C.  $^1\text{H}$  NMR (500 MHz,  $\text{CDCl}_3$ )  $\delta$  8.40 (m, 2H), 8.00–7.98 (m, 1H), 7.64 (t,  $J = 7.5$  Hz, 2H), 7.57 (t,  $J = 7.5$  Hz, 1H), 7.48–7.45 (m, 3H), 7.35–7.34 (m, 4H), 6.70–6.68 (m, 1H).;  $^{13}\text{C}\{^1\text{H}\}$  NMR (126 MHz,  $\text{CDCl}_3$ )  $\delta$  154.69, 154.67, 136.3, 135.9, 134.4, 133.2, 130.6, 130.4, 130.2, 130.1, 129.9, 129.6, 128.5, 128.2, 124.0, 115.5. IR (neat,  $\text{cm}^{-1}$ ) 3065, 1657, 1597, 1581, 1457, 1291, 1216, 1150, 1073, 754. HRMS (ESI)  $[\text{M} + \text{H}]^+$  calcd for  $\text{C}_{20}\text{H}_{15}\text{N}_2\text{O}^+$  299.1179, found 299.1172.

*1,3,4,8,9-Pentaphenyl-1H-benzo[*ij*]imidazo[2,1,5-*de*]quinolizin-10-ium  
trifluoromethanesulfonate (12)*

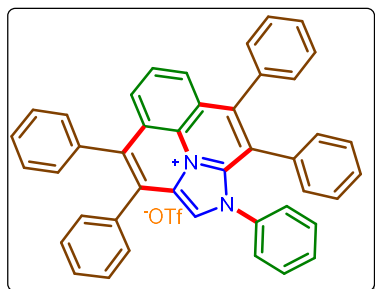

Dark brown gummy solid (128 mg, 89% yield);  $^1\text{H}$  NMR (500 MHz,  $\text{CDCl}_3$ )  $\delta$  7.73 (d,  $J = 4.5$  Hz, 2H), 7.65 (t,  $J = 4.7$  Hz, 1H), 7.61 (s, 1H), 7.52–7.48 (m, 3H), 7.40–7.35 (m, 5H), 7.33–7.26 (m, 9H), 7.18 (t,  $J = 7.7$  Hz, 1H), 7.08 (t,  $J = 7.7$  Hz, 2H), 7.00 (d,  $J = 7.5$  Hz, 2H), 6.89 (t,  $J = 7.5$  Hz, 1H), 6.82 (t,  $J = 7.5$  Hz, 2H).;  $^{13}\text{C}\{^1\text{H}\}$  NMR (126 MHz,  $\text{CDCl}_3$ )  $\delta$  147.3, 137.9, 135.2, 134.7, 134.4, 134.0, 132.9, 131.7, 131.0, 130.6, 130.4, 129.95, 129.05, 128.92, 128.91, 128.8, 128.6, 128.6, 128.5, 128.2, 128.1, 128.0, 127.9, 127.1, 126.8, 126.6, 126.2, 125.5, 125.3, 124.6, 119.6.  $^{19}\text{F}$  NMR (471 MHz,  $\text{DMSO-d}_6$ )  $\delta$  -78.37. IR (neat,  $\text{cm}^{-1}$ ) 3141, 1558, 1257, 1200, 1142, 1101, 1028, 1013, 802, 769. HRMS (ESI)  $[\text{M} - \text{OTf}]^+$  calcd for  $\text{C}_{43}\text{H}_{29}\text{N}_2^+$  573.2325, found 573.2360.

## 17. NMR Spectra

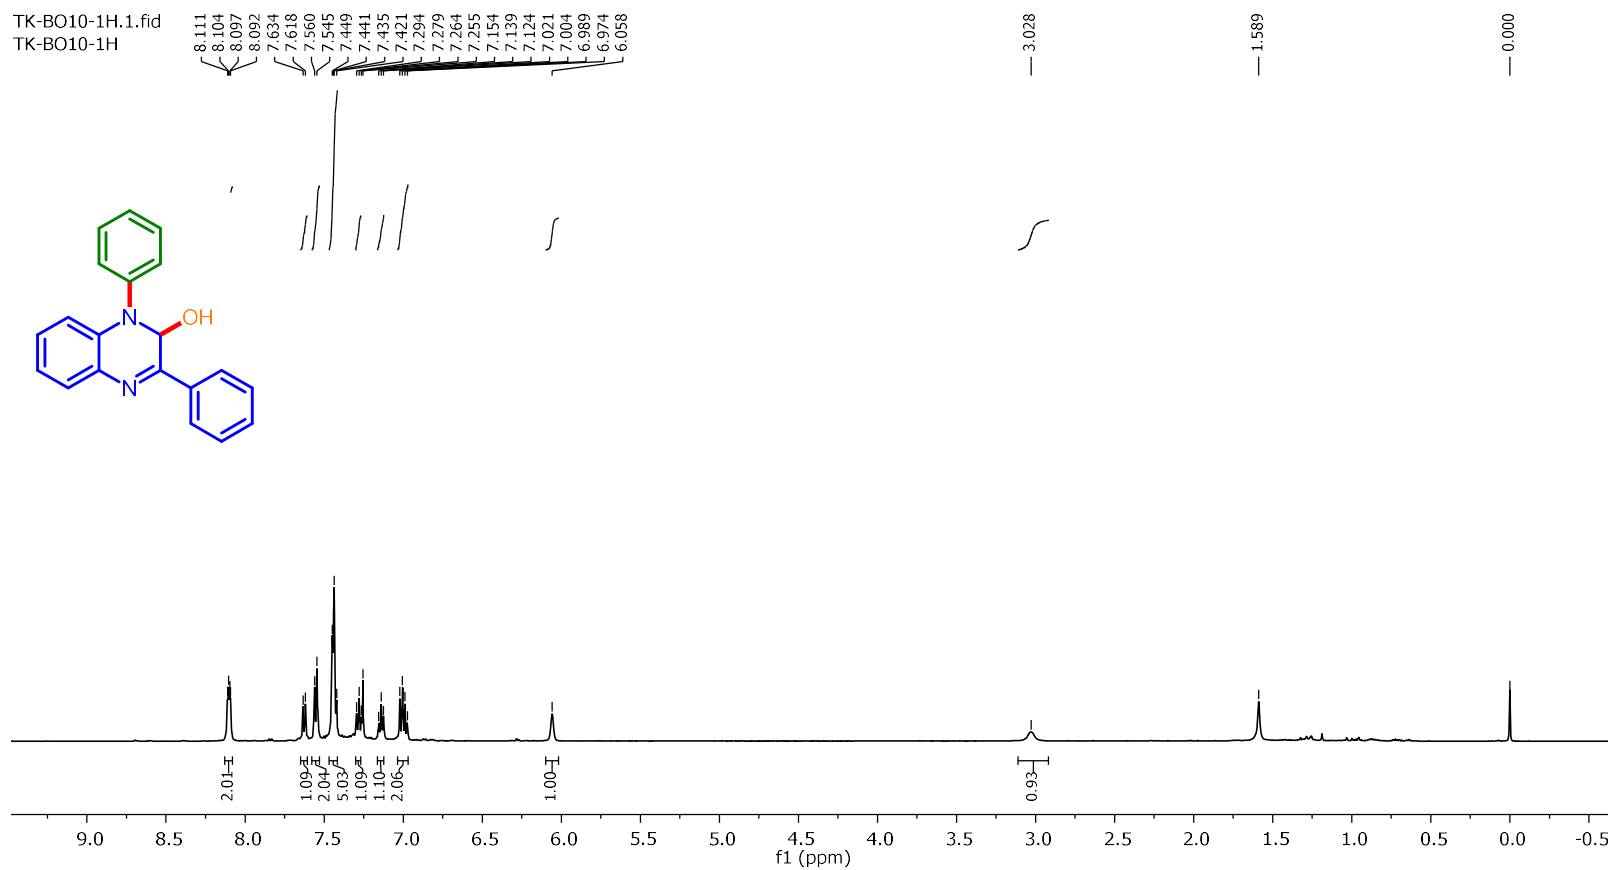

**1,3-Diphenyl-1,2-dihydroquinoxalin-2-ol (3aa):  $^1\text{H}$  NMR ( $\text{CDCl}_3$ , 500 MHz)**

TK-B010-13C.10.fid  
TK-B010-13C

153.557  
143.412  
136.087  
133.732  
132.362  
130.649  
129.706  
128.855  
128.623  
128.438  
127.514  
126.151  
125.269  
120.716  
115.836

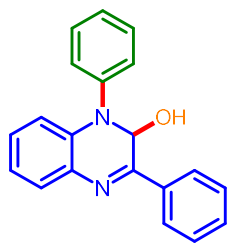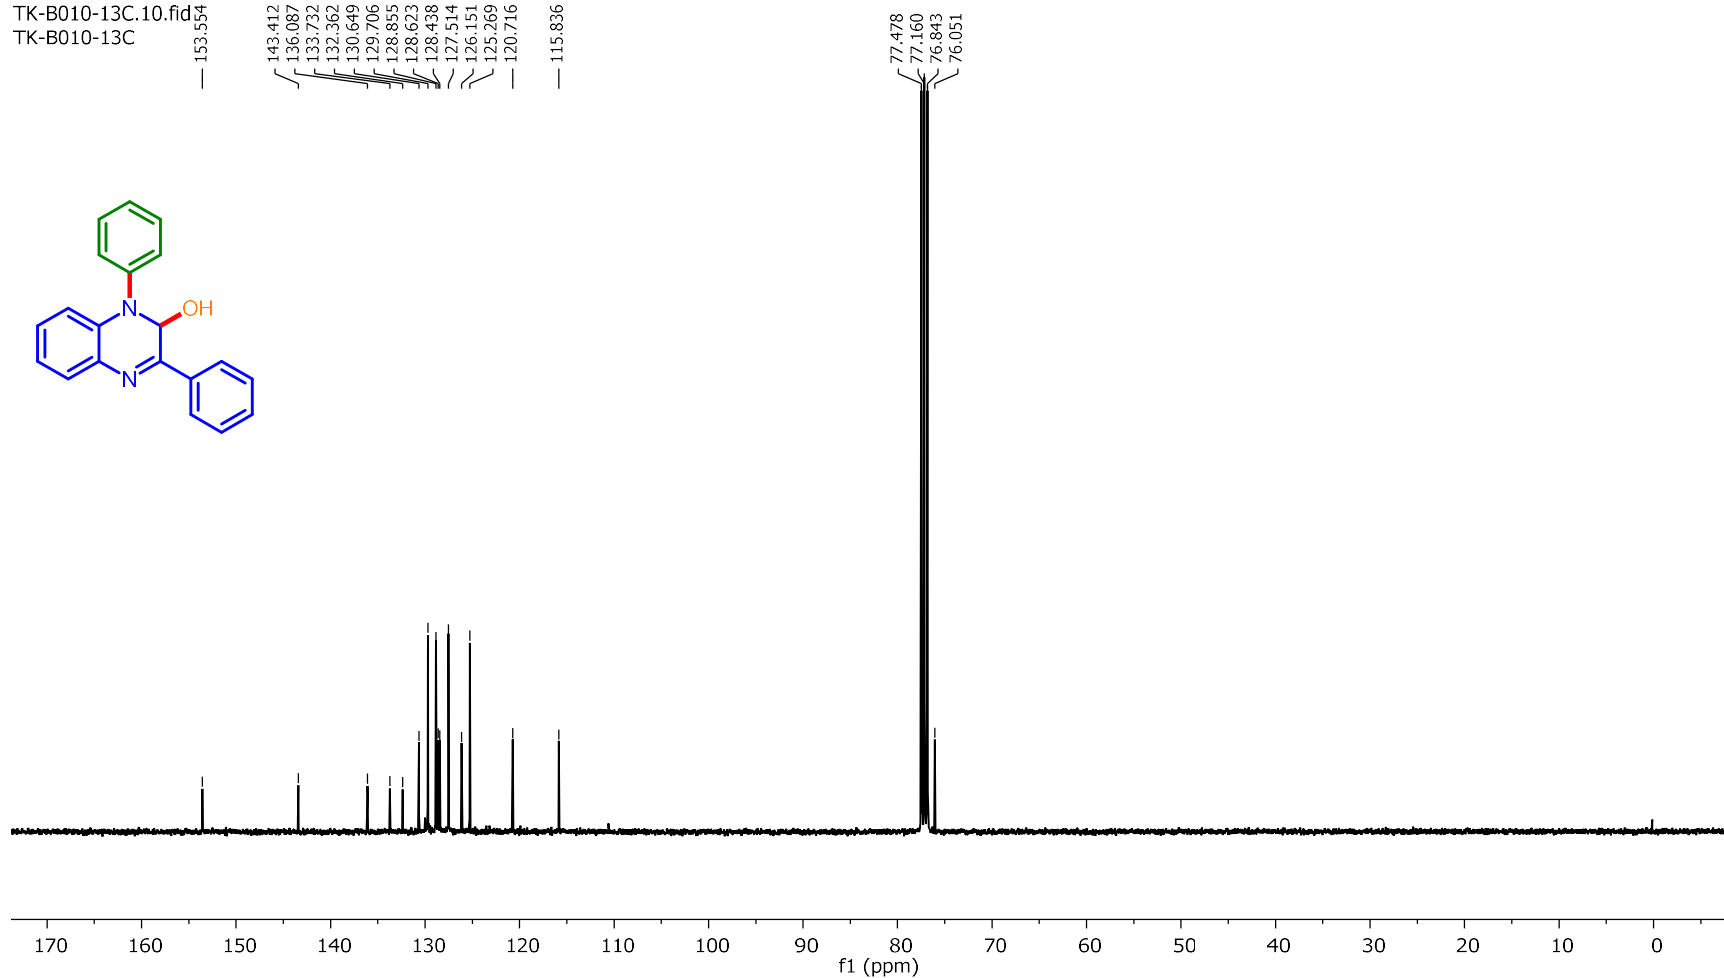

1,3-Diphenyl-1,2-dihydroquinoxalin-2-ol (3aa):  $^{13}\text{C}\{^1\text{H}\}$  NMR ( $\text{CDCl}_3$ , 101 MHz)



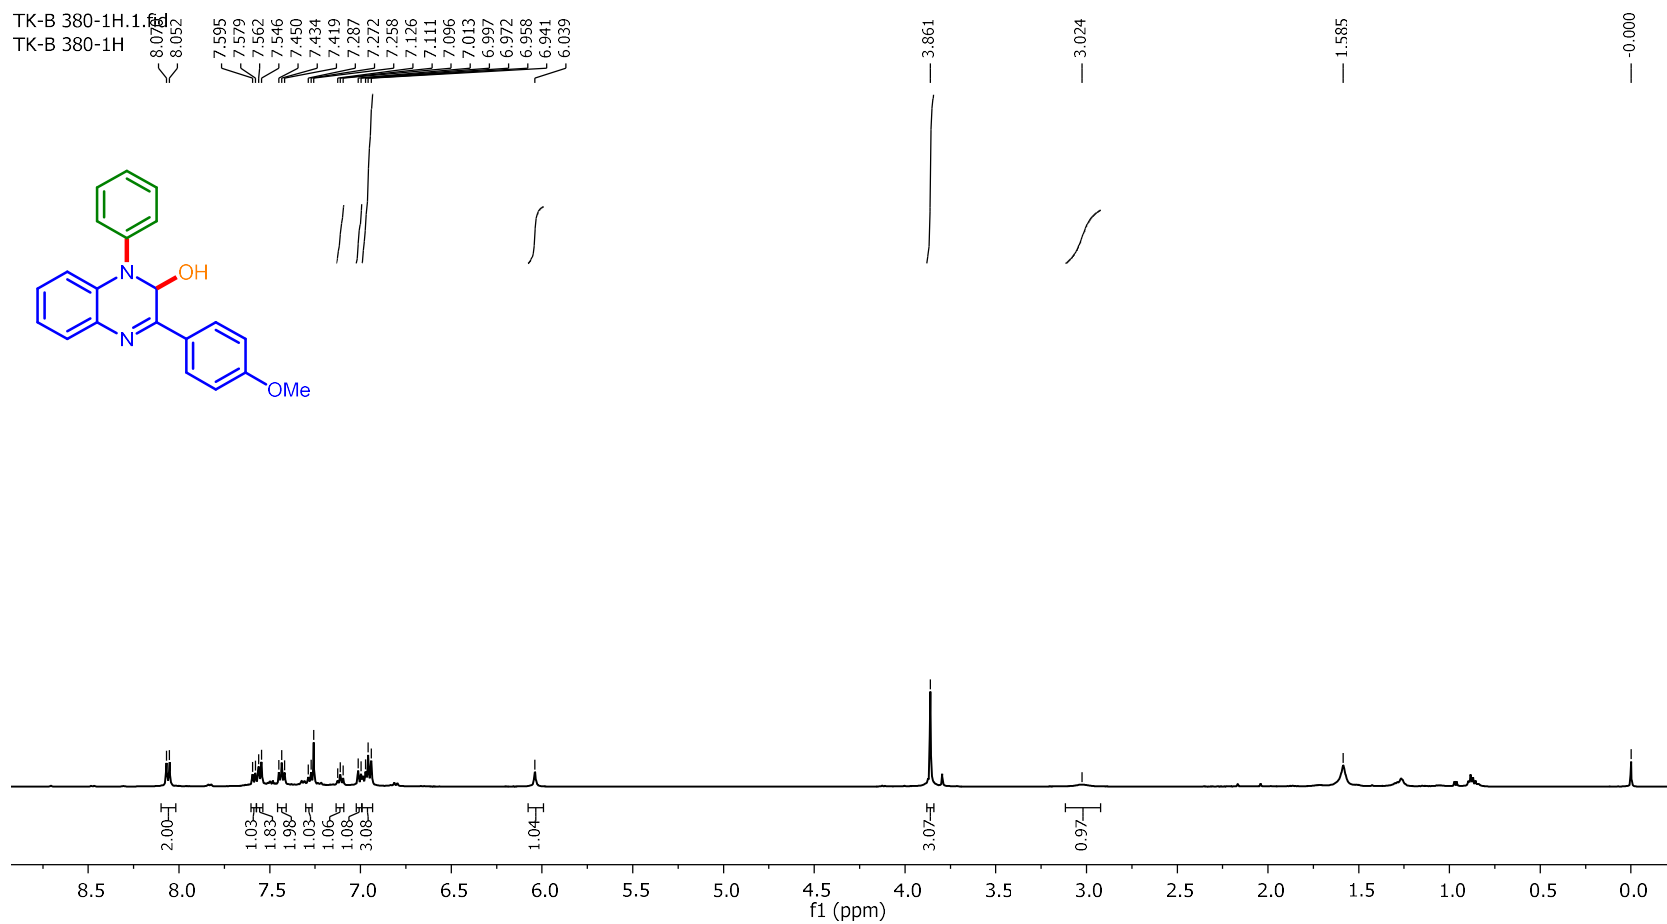

**3-(4-Methoxyphenyl)-1-phenyl-1,2-dihydroquinoxalin-2-ol (3ba):  $^1\text{H}$  NMR ( $\text{CDCl}_3$ , 500 MHz)**

TK-B380-13C.12.8d  
TK-B380-13C

— 161.780  
— 153.296  
— 143.555  
— 133.908  
— 132.173  
— 129.678  
— 129.232  
— 128.823  
— 128.273  
— 127.922  
— 126.027  
— 125.235  
— 120.698  
— 115.761  
— 114.228

— 77.478  
— 77.161  
— 76.844  
— 76.001  
— 55.556

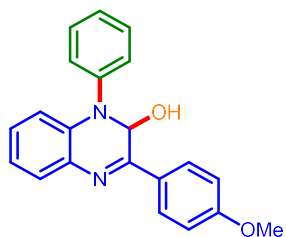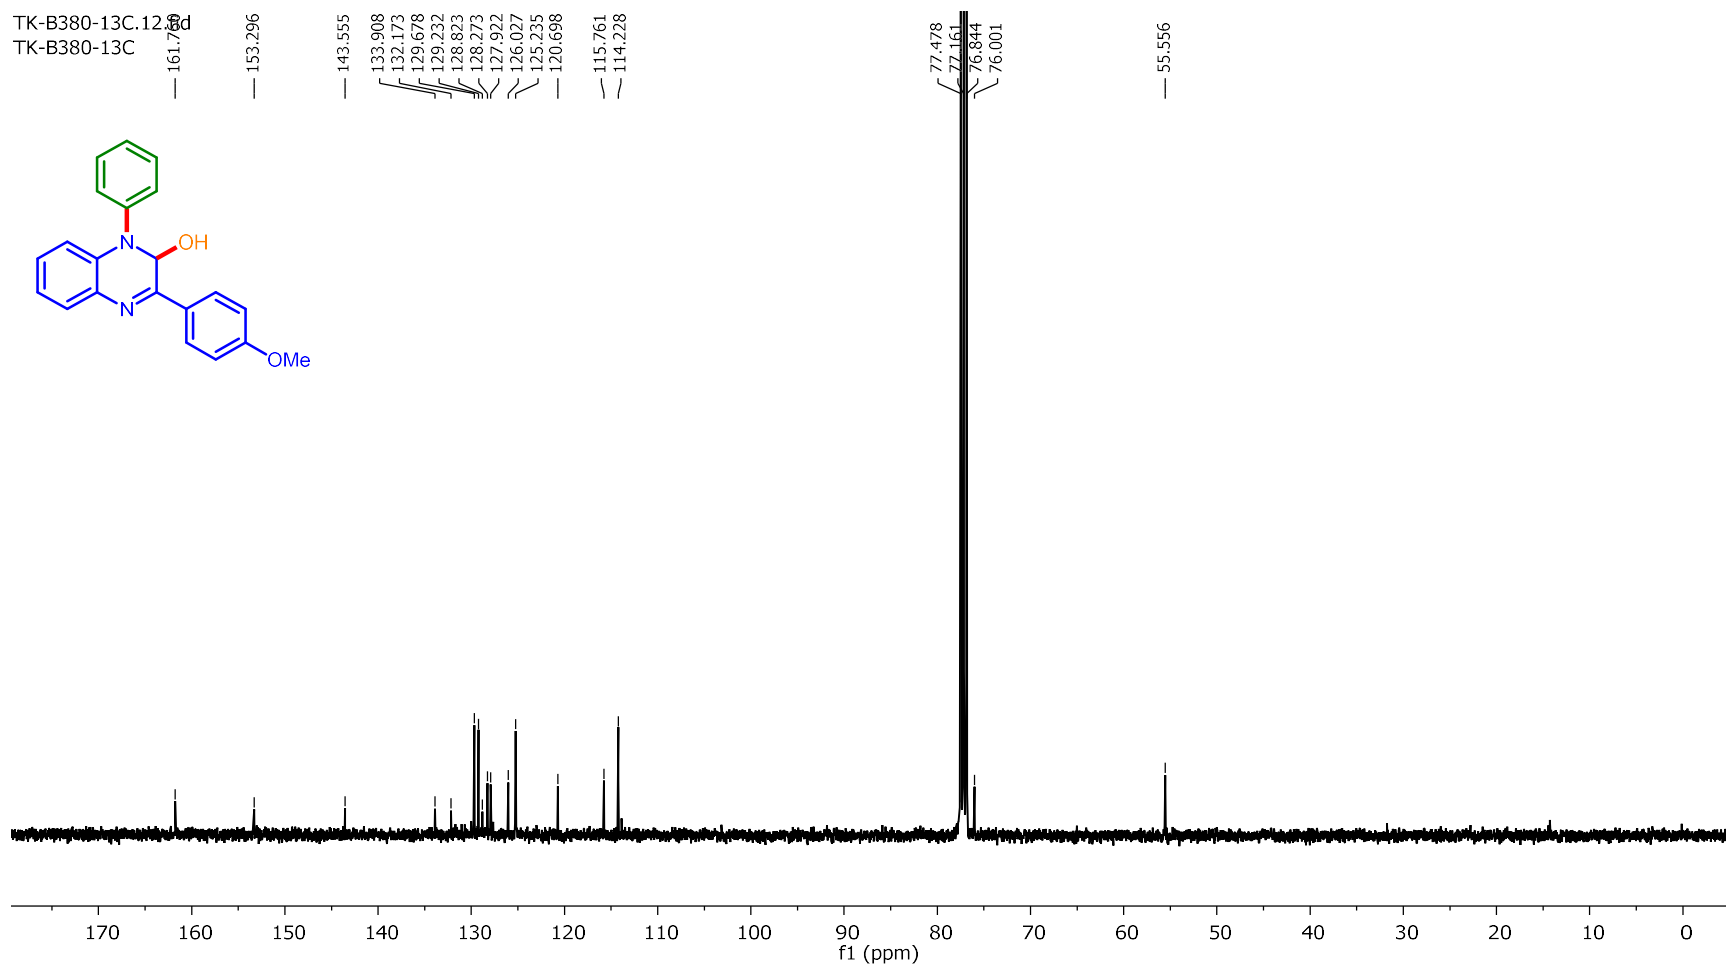

**3-(4-Methoxyphenyl)-1-phenyl-1,2-dihydroquinoxalin-2-ol (3ba):  $^{13}\text{C}\{^1\text{H}\}$  NMR ( $\text{CDCl}_3$ , 101MHz)**

TK-B240-1H.1.fid  
TK-B240-1H

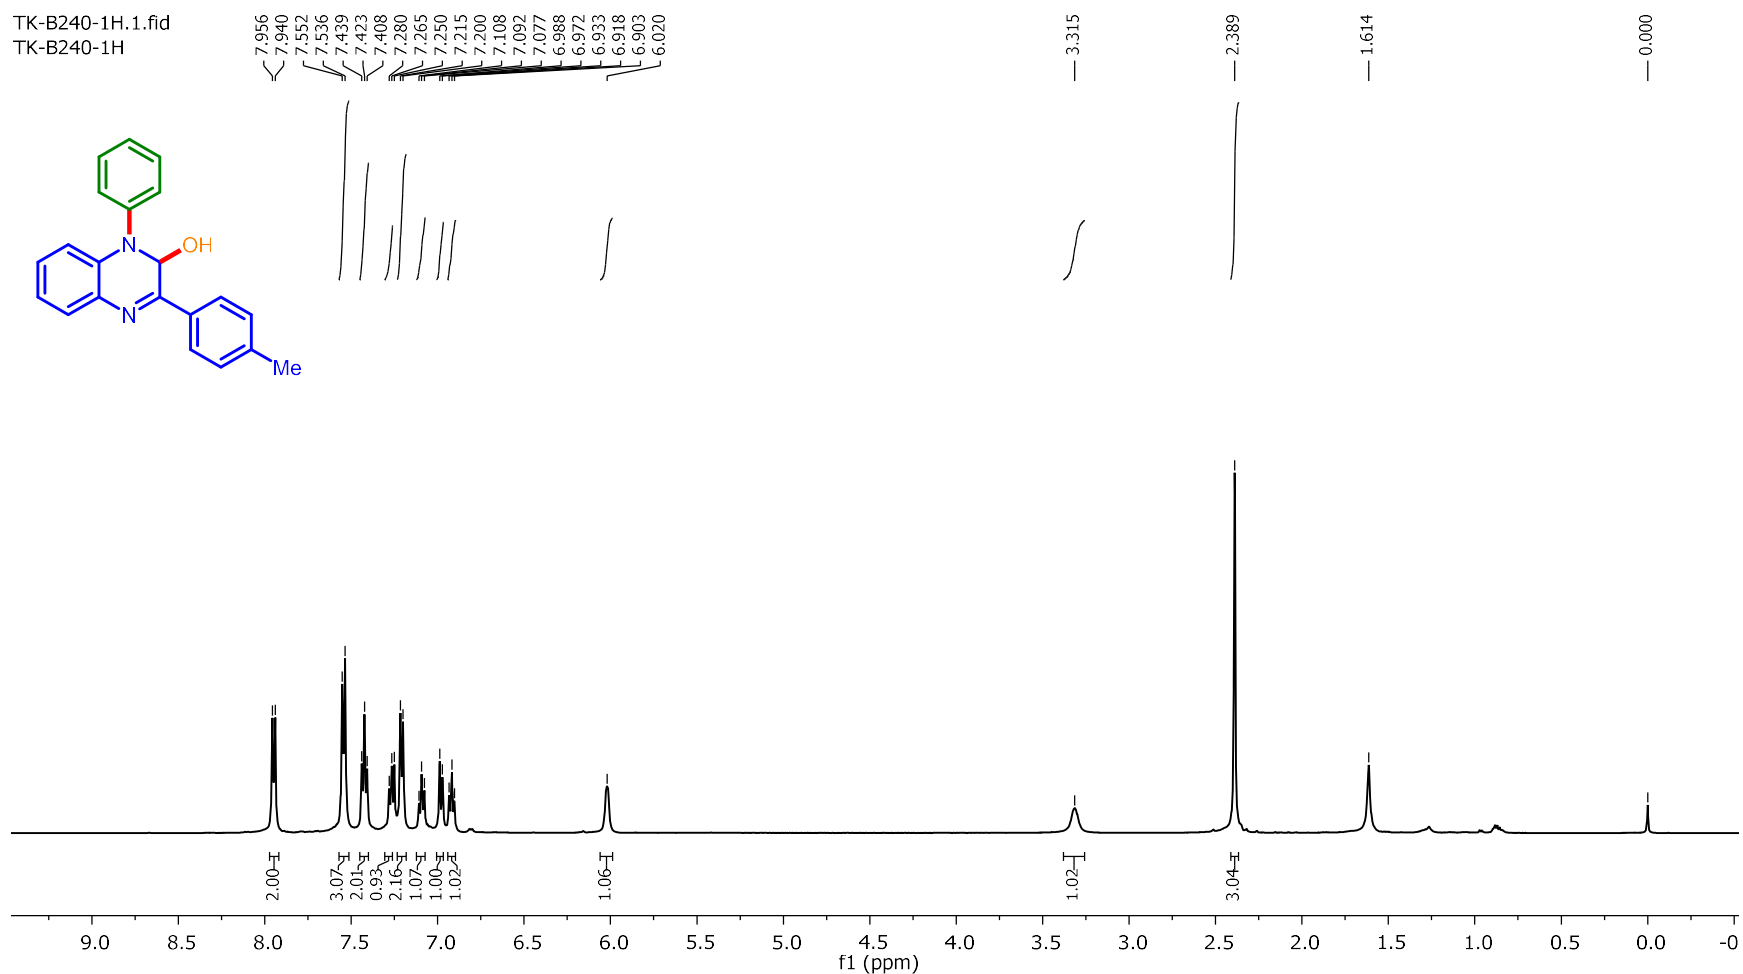

1-Phenyl-3-(*p*-tolyl)-1,2-dihydroquinoxalin-2-ol (3ca): <sup>1</sup>H NMR (CDCl<sub>3</sub>, 500MHz)

TK-B240-13C.13d  
TK-B240-13C

153.588  
143.529  
140.972  
133.815  
133.329  
132.342  
129.664  
129.522  
128.361  
128.150  
127.511  
126.053  
125.304  
120.643  
115.710

77.415  
77.160  
76.907  
76.056

21.614

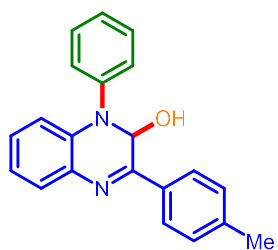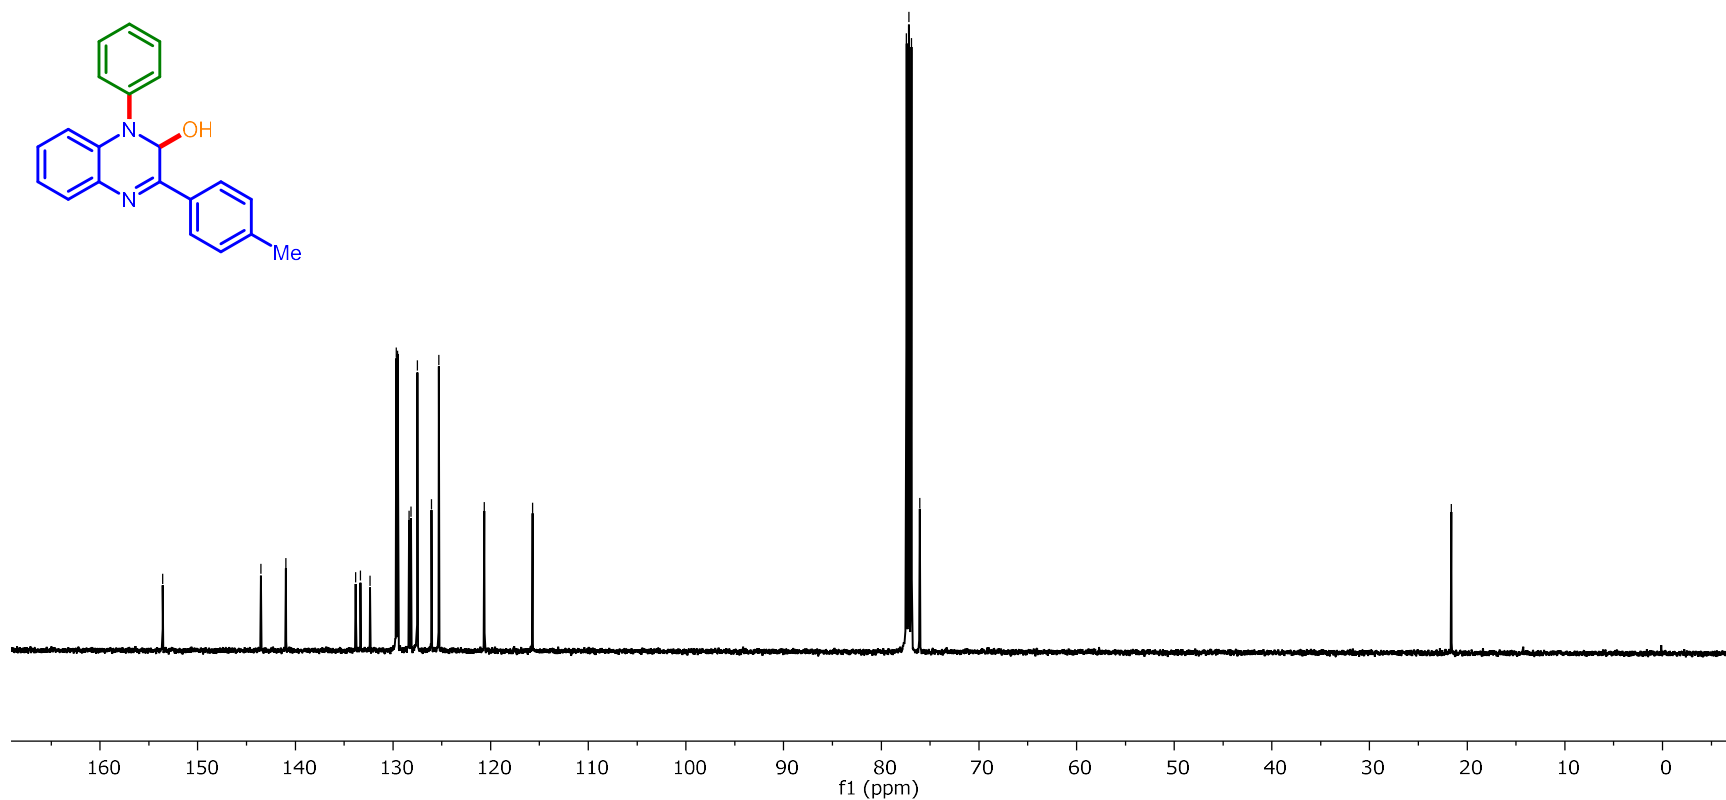

1-Phenyl-3-(*p*-tolyl)-1,2-dihydroquinoxalin-2-ol (3ca):  $^{13}\text{C}\{^1\text{H}\}$  NMR ( $\text{CDCl}_3$ , 126 MHz)

TK-B410-1H.1.fid  
TK-B410-1H

8.062  
8.046  
7.659  
7.643  
7.555  
7.539  
7.450  
7.435  
7.419  
7.328  
7.312  
7.291  
7.259  
7.157  
7.143  
7.128  
7.030  
7.025  
7.016  
7.010  
7.007  
7.001  
6.072  
6.055

2.985  
2.972  
2.958  
2.944  
2.931  
2.917  
2.789  
2.768

1.567  
1.278  
1.264

0.000

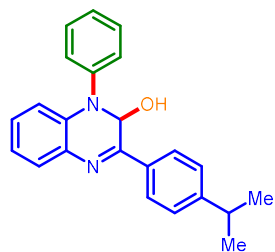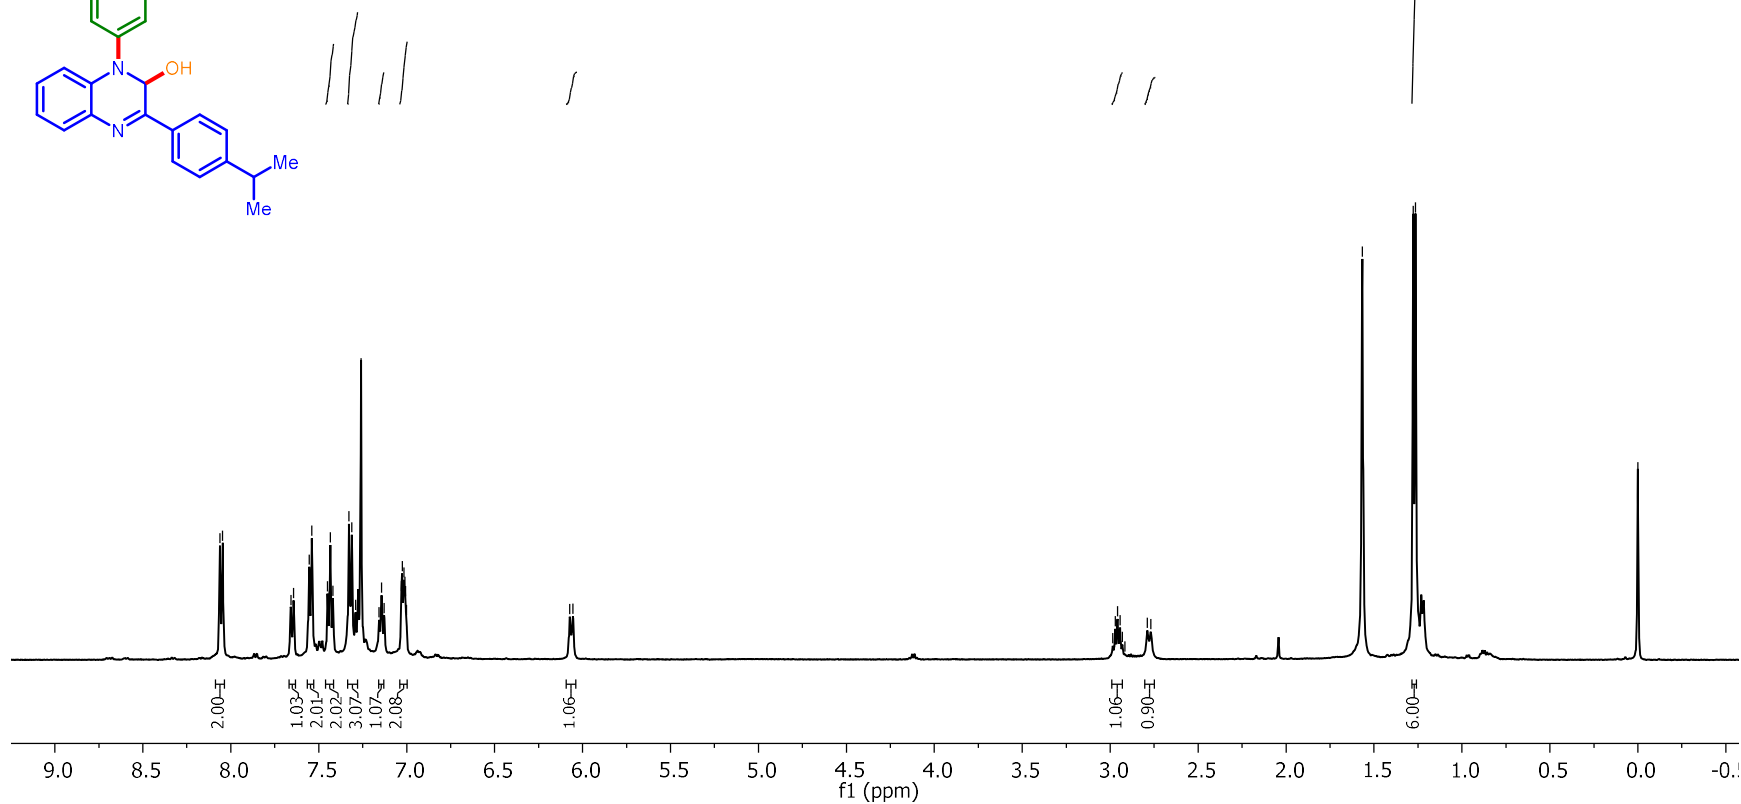

**3-(4-Isopropylphenyl)-1-phenyl-1,2-dihydroquinoxalin-2-ol (3da): <sup>1</sup>H NMR (CDCl<sub>3</sub>, 500 MHz)**

TK-B410-13C  
13C

153.663  
151.921  
143.471  
133.894  
133.808  
132.359  
129.697  
128.579  
128.198  
127.605  
127.007  
126.107  
125.271  
120.701  
115.853

77.372  
77.166  
76.948  
76.054

34.258

23.983  
23.916

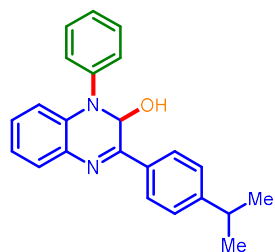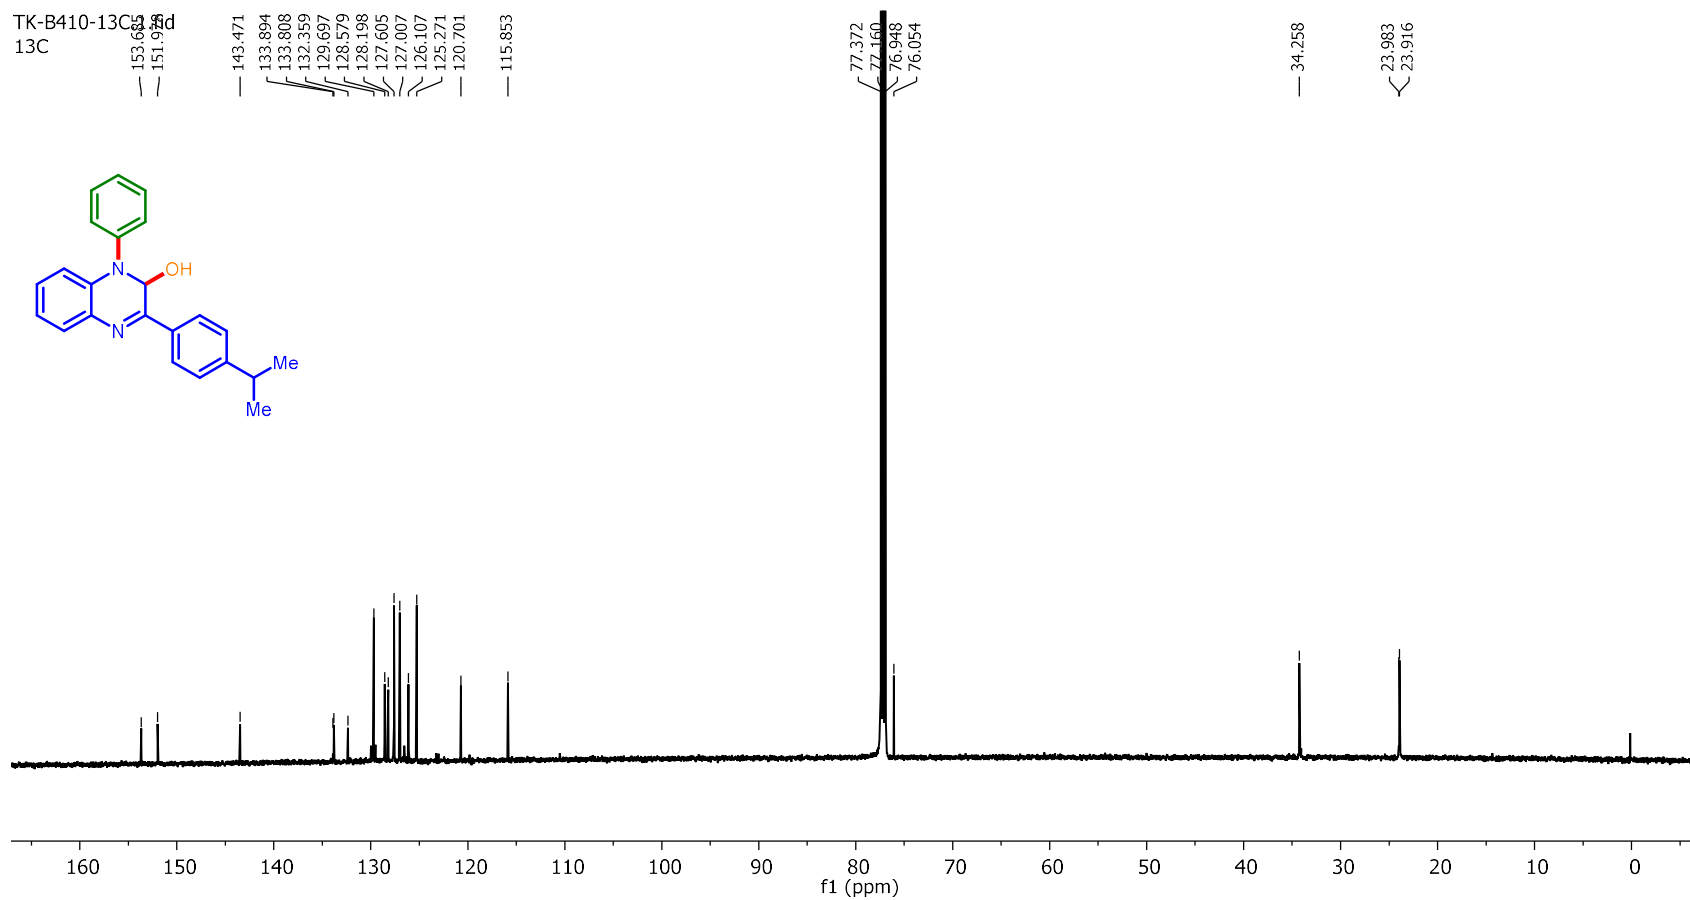

**3-(4-Isopropylphenyl)-1-phenyl-1,2-dihydroquinoxalin-2-ol (3da):  $^{13}\text{C}\{^1\text{H}\}$  NMR ( $\text{CDCl}_3$ , 151 MHz)**

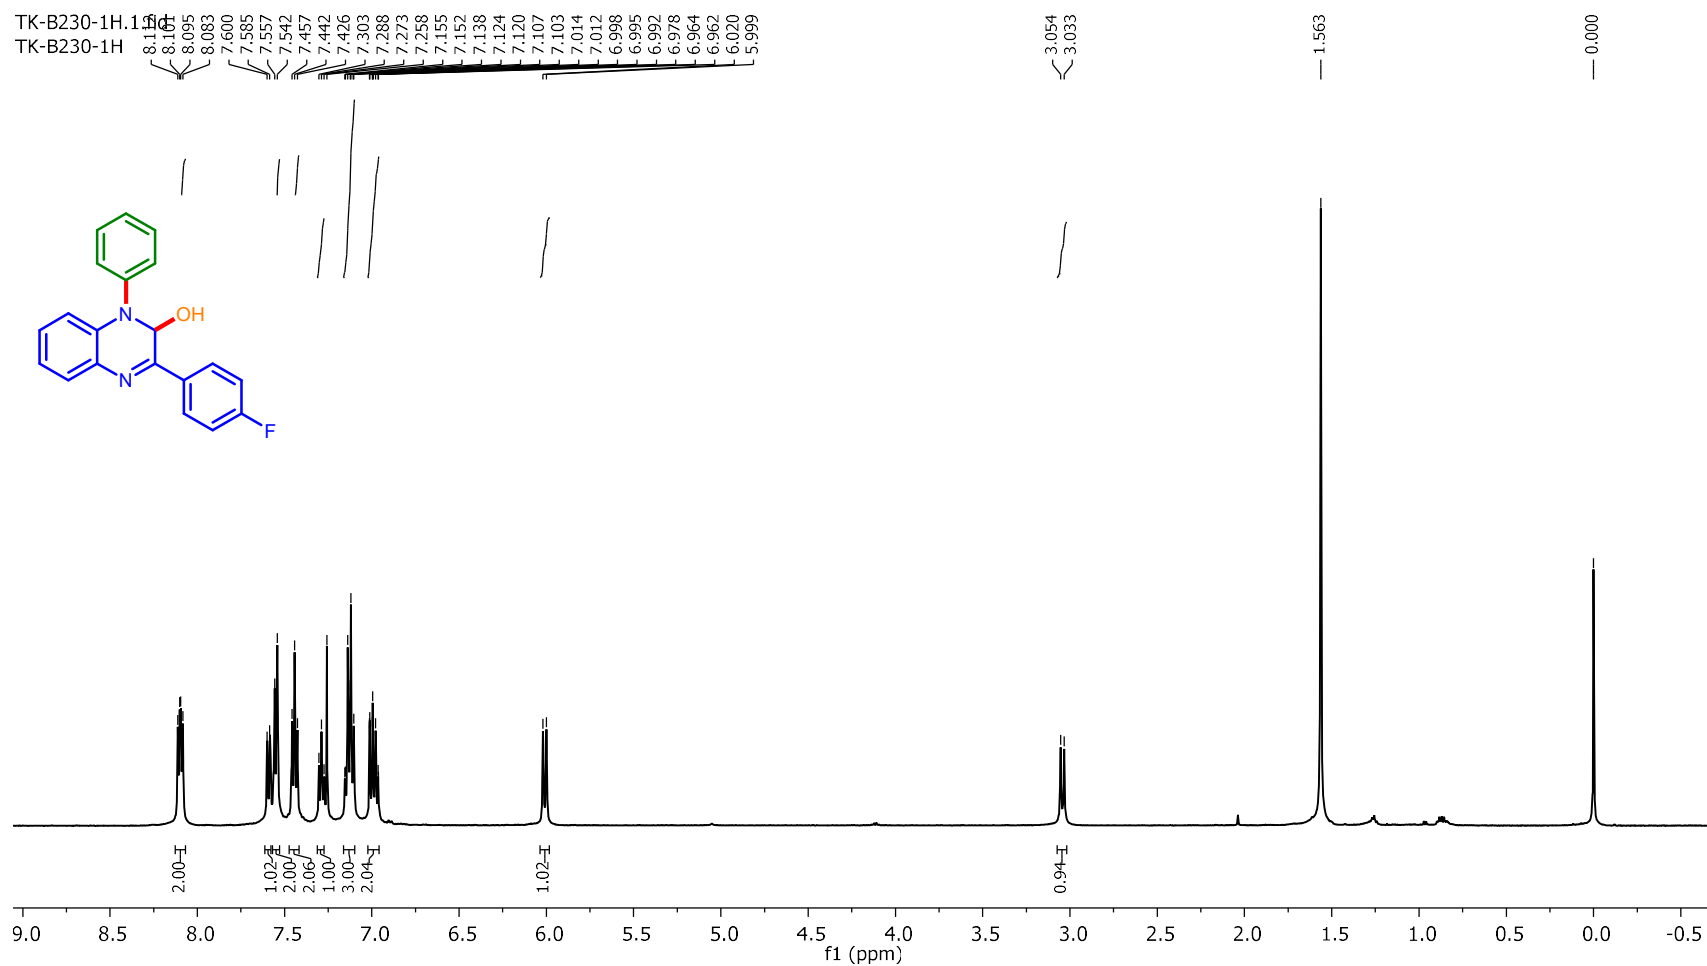

**3-(4-Fluorophenyl)-1-phenyl-1,2-dihydroquinoxalin-2-ol (3ea):  $^1\text{H}$  NMR ( $\text{CDCl}_3$ , 500 MHz)**

TK-B230-13C.1.fid  
TK-B230-13C

165.443  
163.444  
152.466  
143.388  
133.591  
132.443  
132.418  
132.250  
129.754  
129.712  
129.643  
128.578  
128.508  
126.270  
125.334  
120.795  
115.972  
115.848  
115.798

77.414  
77.160  
76.906  
76.080

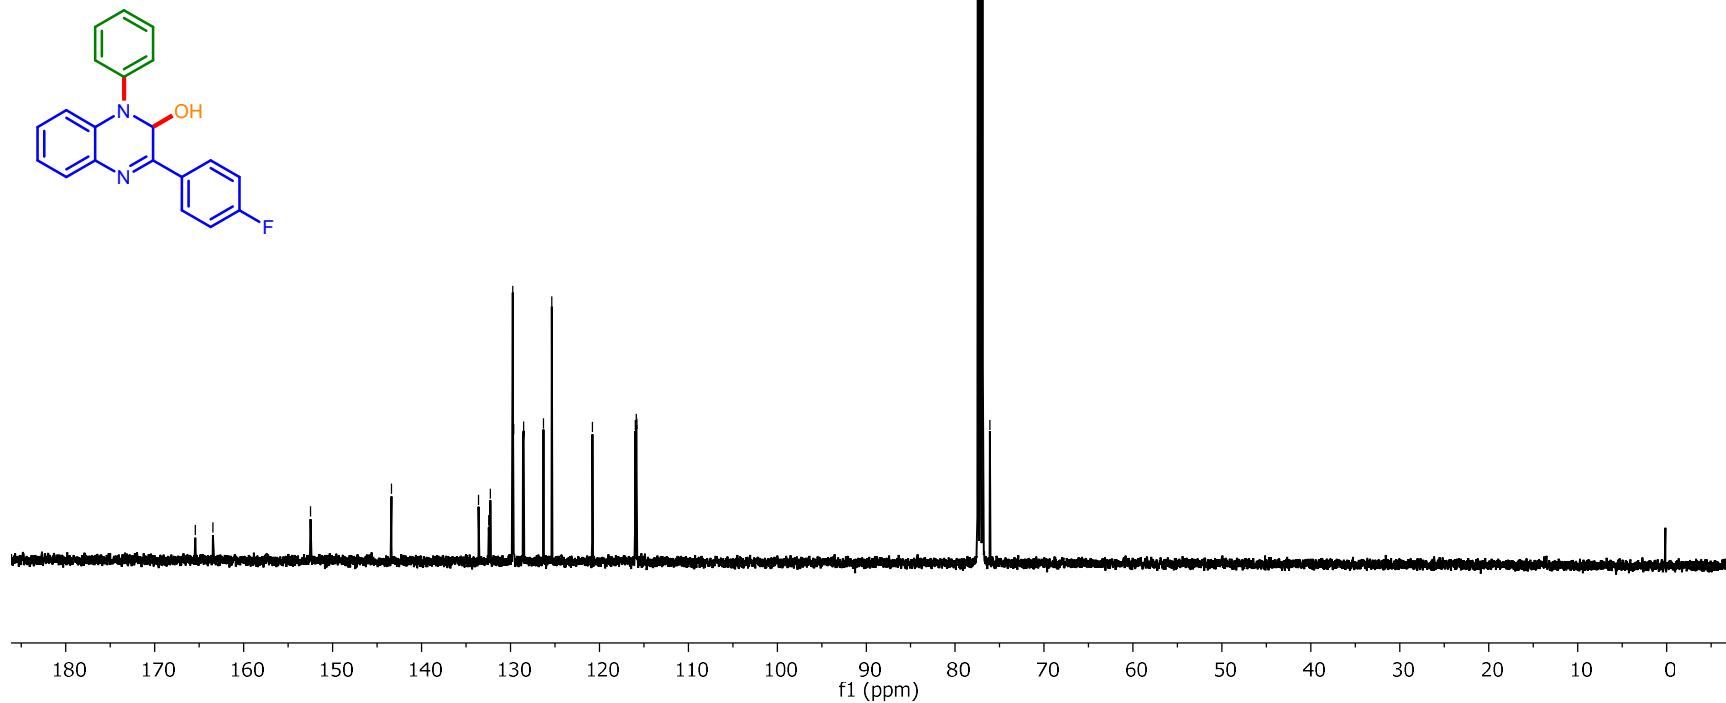

**3-(4-Fluorophenyl)-1-phenyl-1,2-dihydroquinoxalin-2-ol (3ea):  $^{13}\text{C}\{^1\text{H}\}$  NMR ( $\text{CDCl}_3$ , 126 MHz)**



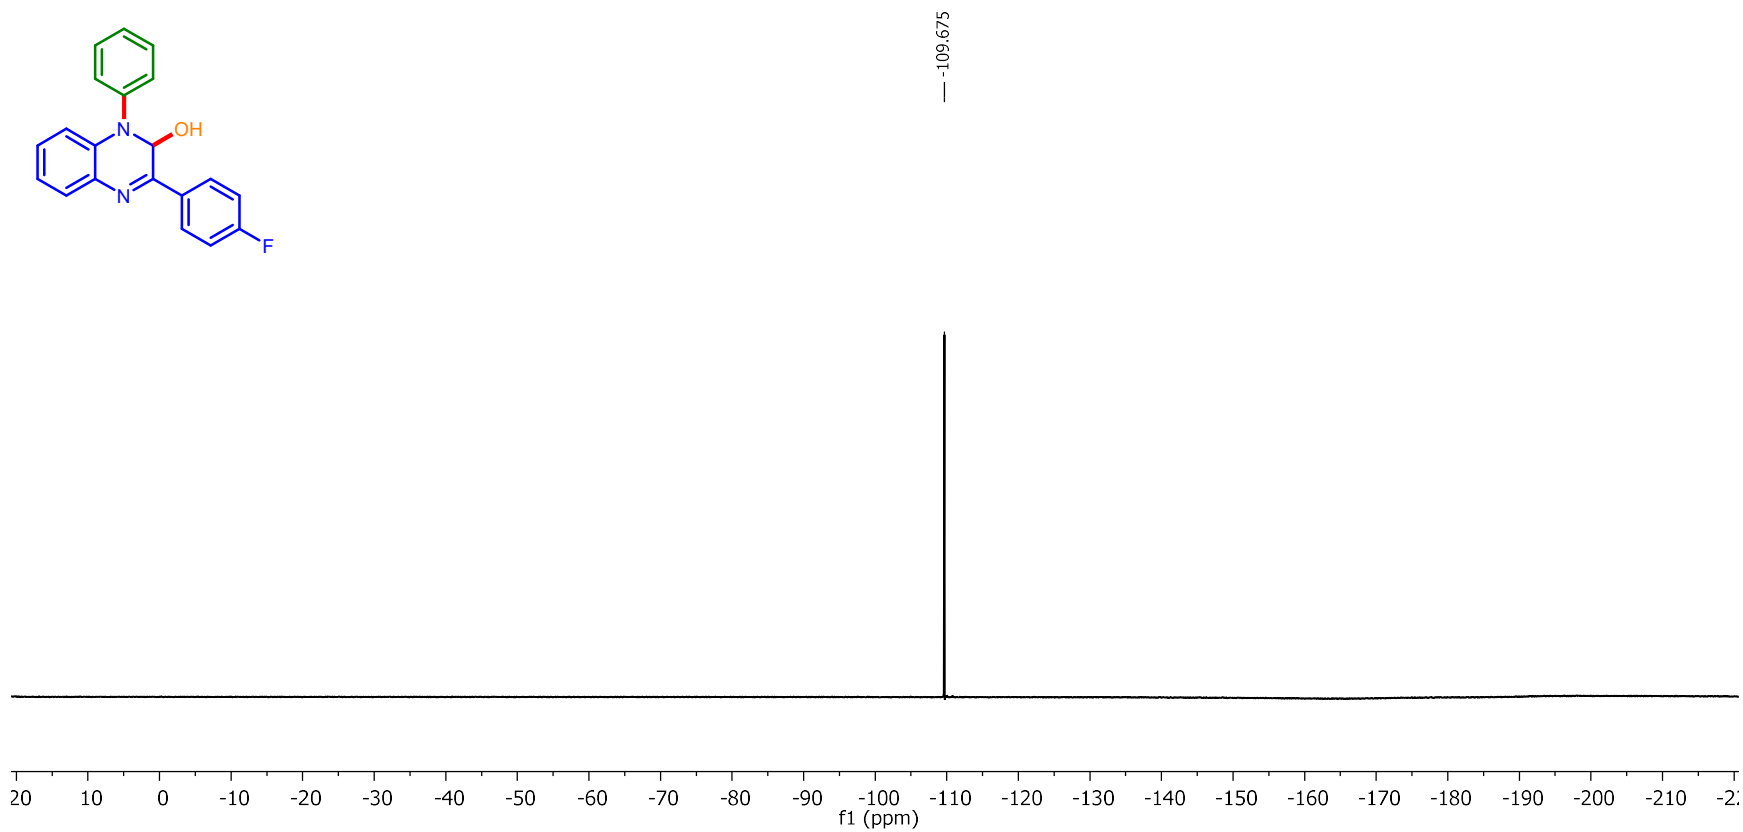

**3-(4-Fluorophenyl)-1-phenyl-1,2-dihydroquinoxalin-2-ol (3ea):  $^{19}\text{F}$  NMR ( $\text{CDCl}_3$ , 471 MHz)**

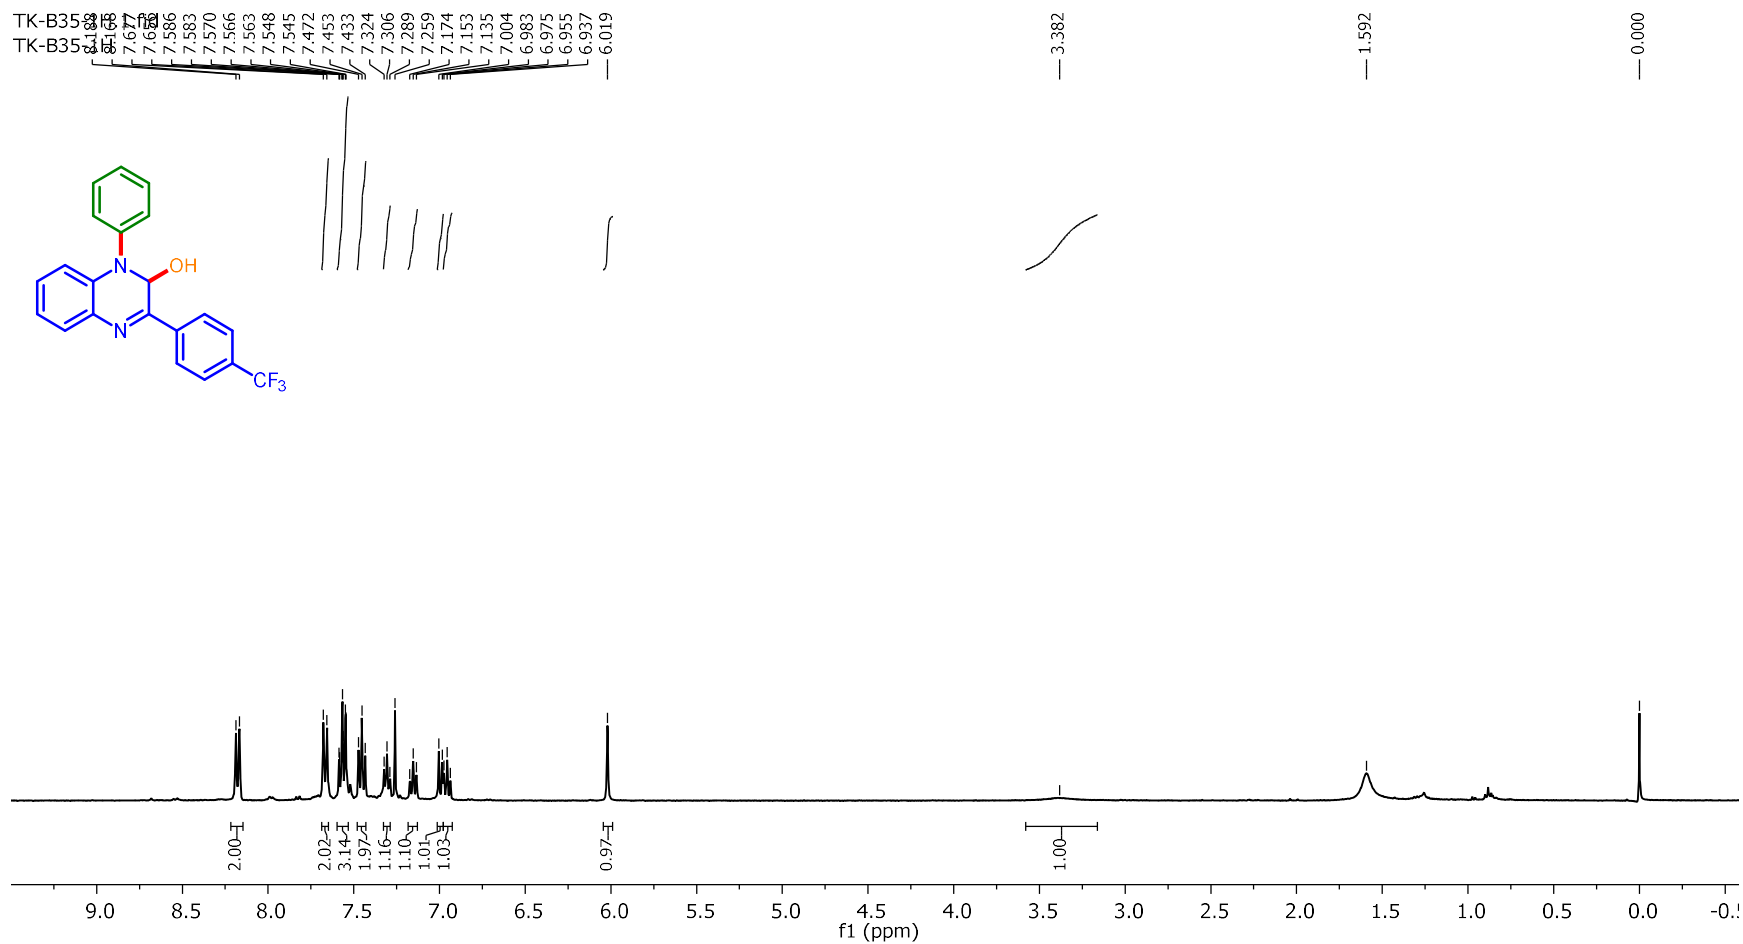

1-Phenyl-3-(4-(trifluoromethyl)phenyl)-1,2-dihydroquinoxalin-2-ol (3fa):<sup>1</sup>H NMR (CDCl<sub>3</sub>, 500 MHz)

TK-B35-13C.1  
TK-B35-13C

151.724  
143.205  
139.259  
133.383  
132.526  
132.152  
131.893  
129.804  
129.154  
128.838  
127.794  
127.506  
126.475  
125.748  
125.716  
125.686  
125.655  
125.452  
120.839  
115.853

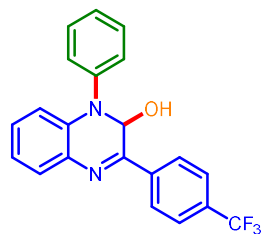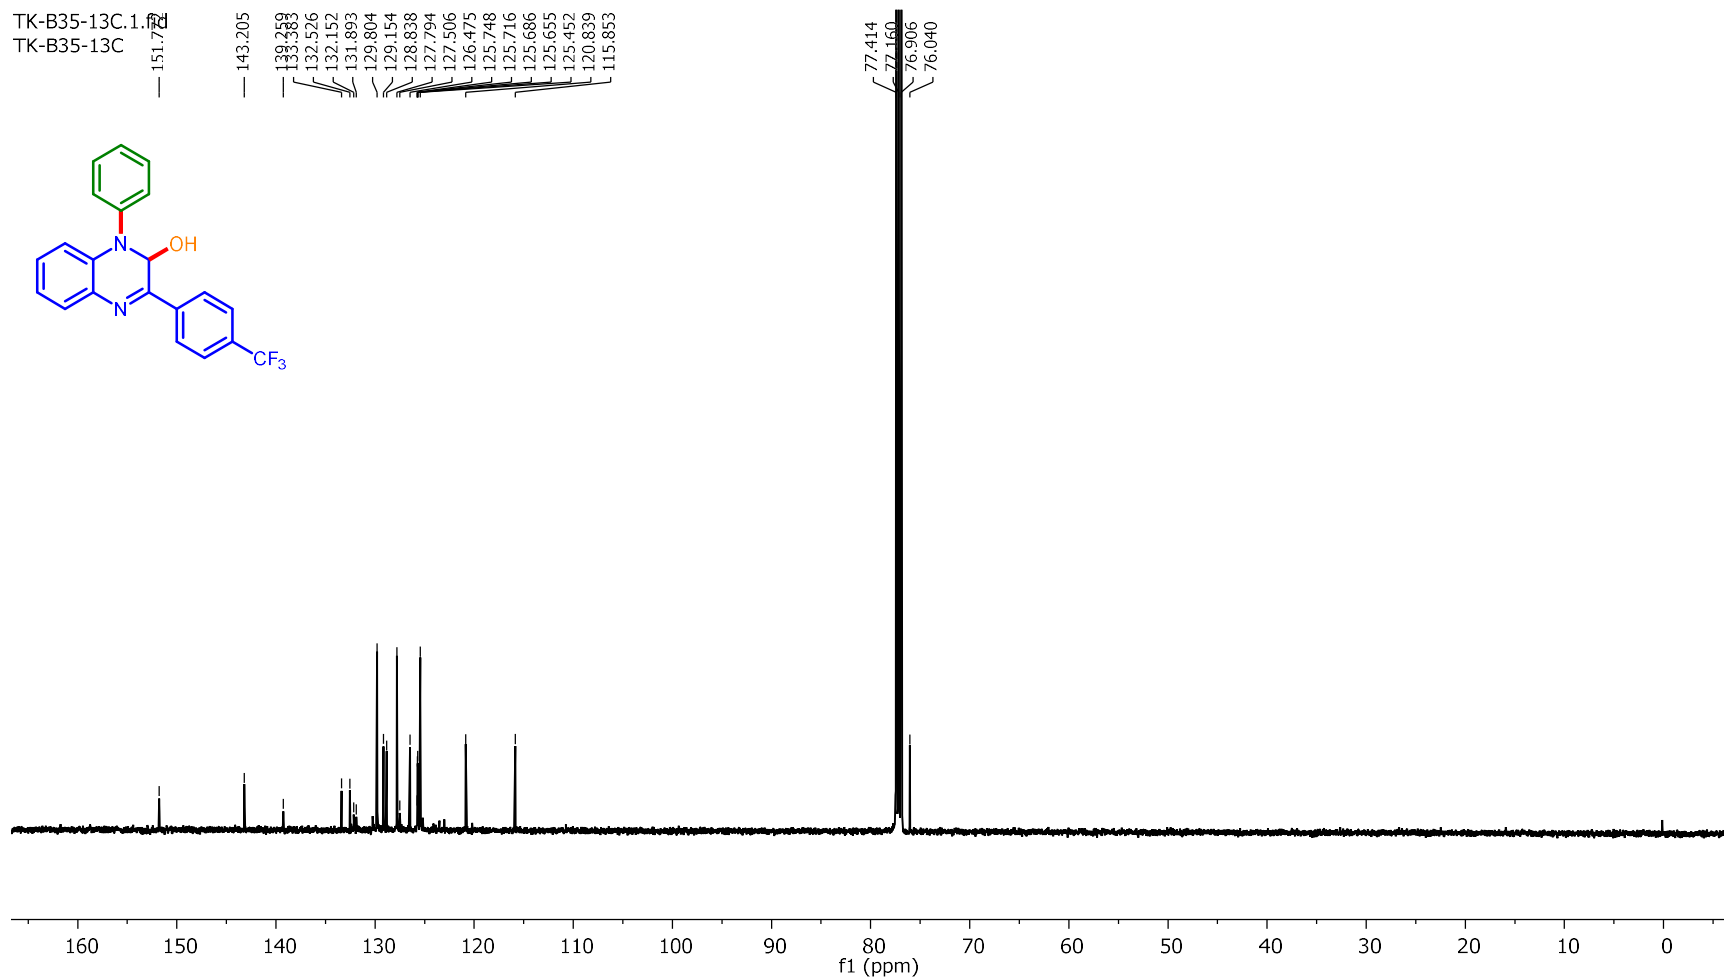

**1-Phenyl-3-(4-(trifluoromethyl)phenyl)-1,2-dihydroquinoxalin-2-ol (3fa):  $^{13}\text{C}\{^1\text{H}\}$  NMR ( $\text{CDCl}_3$ , 126 MHz)**

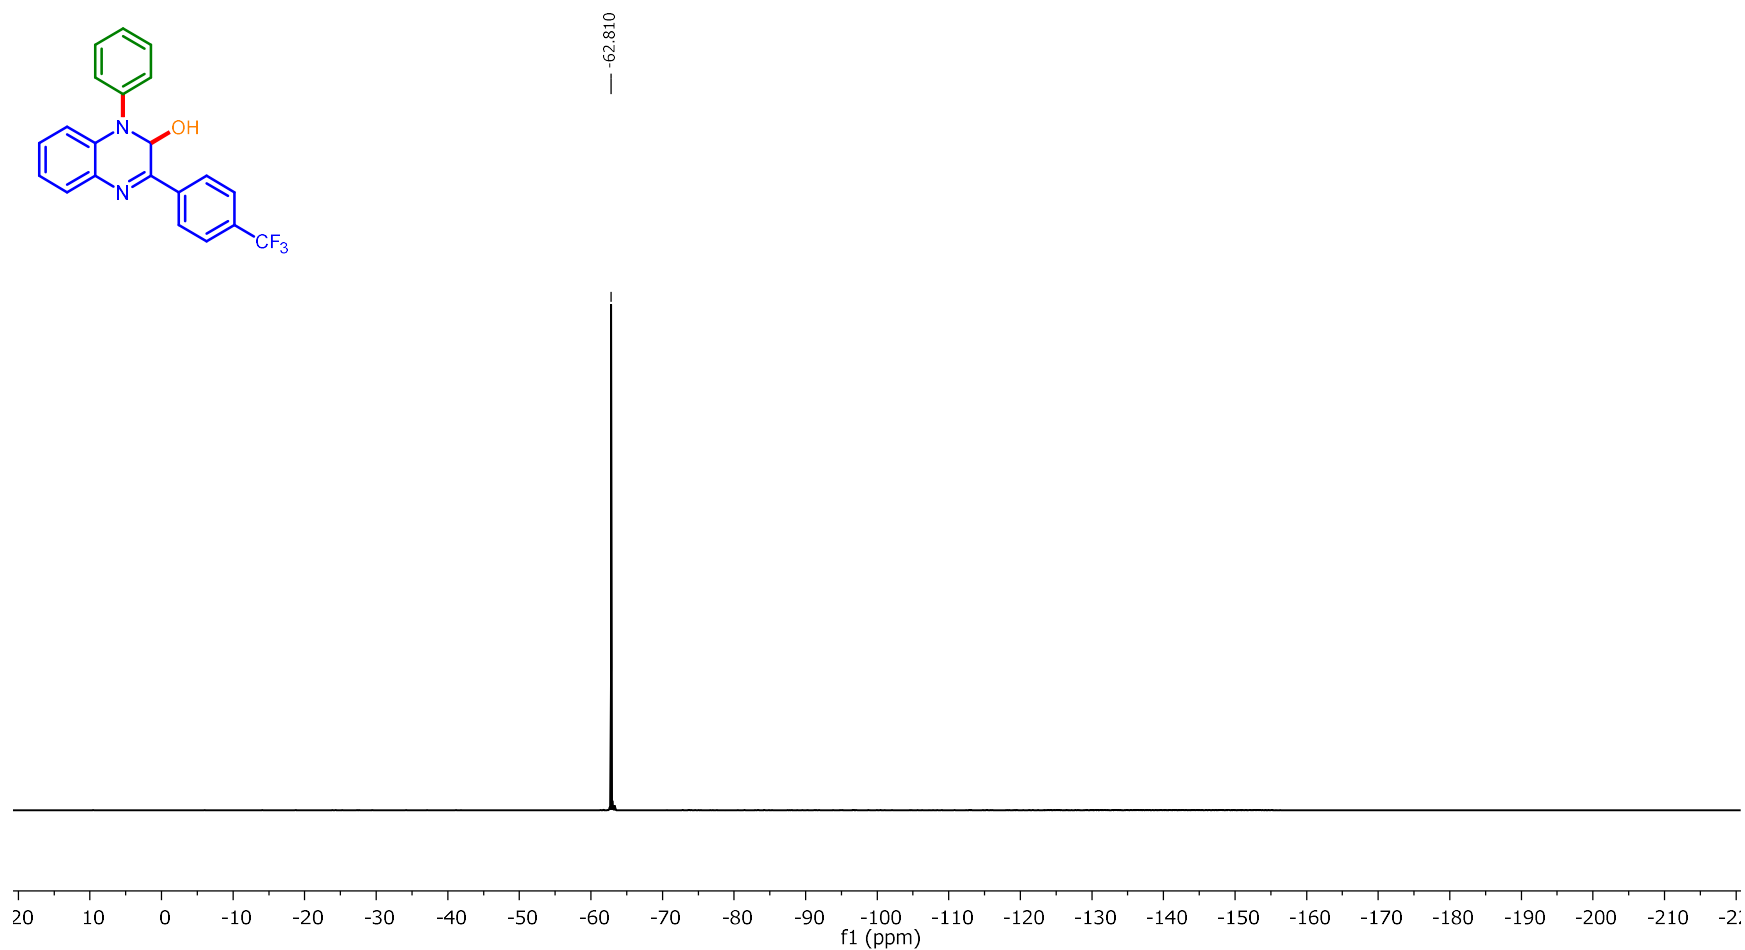

**1-Phenyl-3-(4-(trifluoromethyl)phenyl)-1,2-dihydroquinoxalin-2-ol (3fa):  $^{19}\text{F}$  NMR ( $\text{CDCl}_3$ , 471 MHz)**



PP-TK-B220-13C.1.fid  
PP-TK-B220-13C

— 152.350  
— 143.334  
— 136.832  
— 134.618  
— 133.562  
— 132.392  
— 129.777  
— 129.077  
— 128.839  
— 128.714  
— 126.340  
— 125.373  
— 120.827  
— 115.885

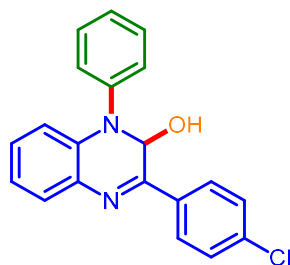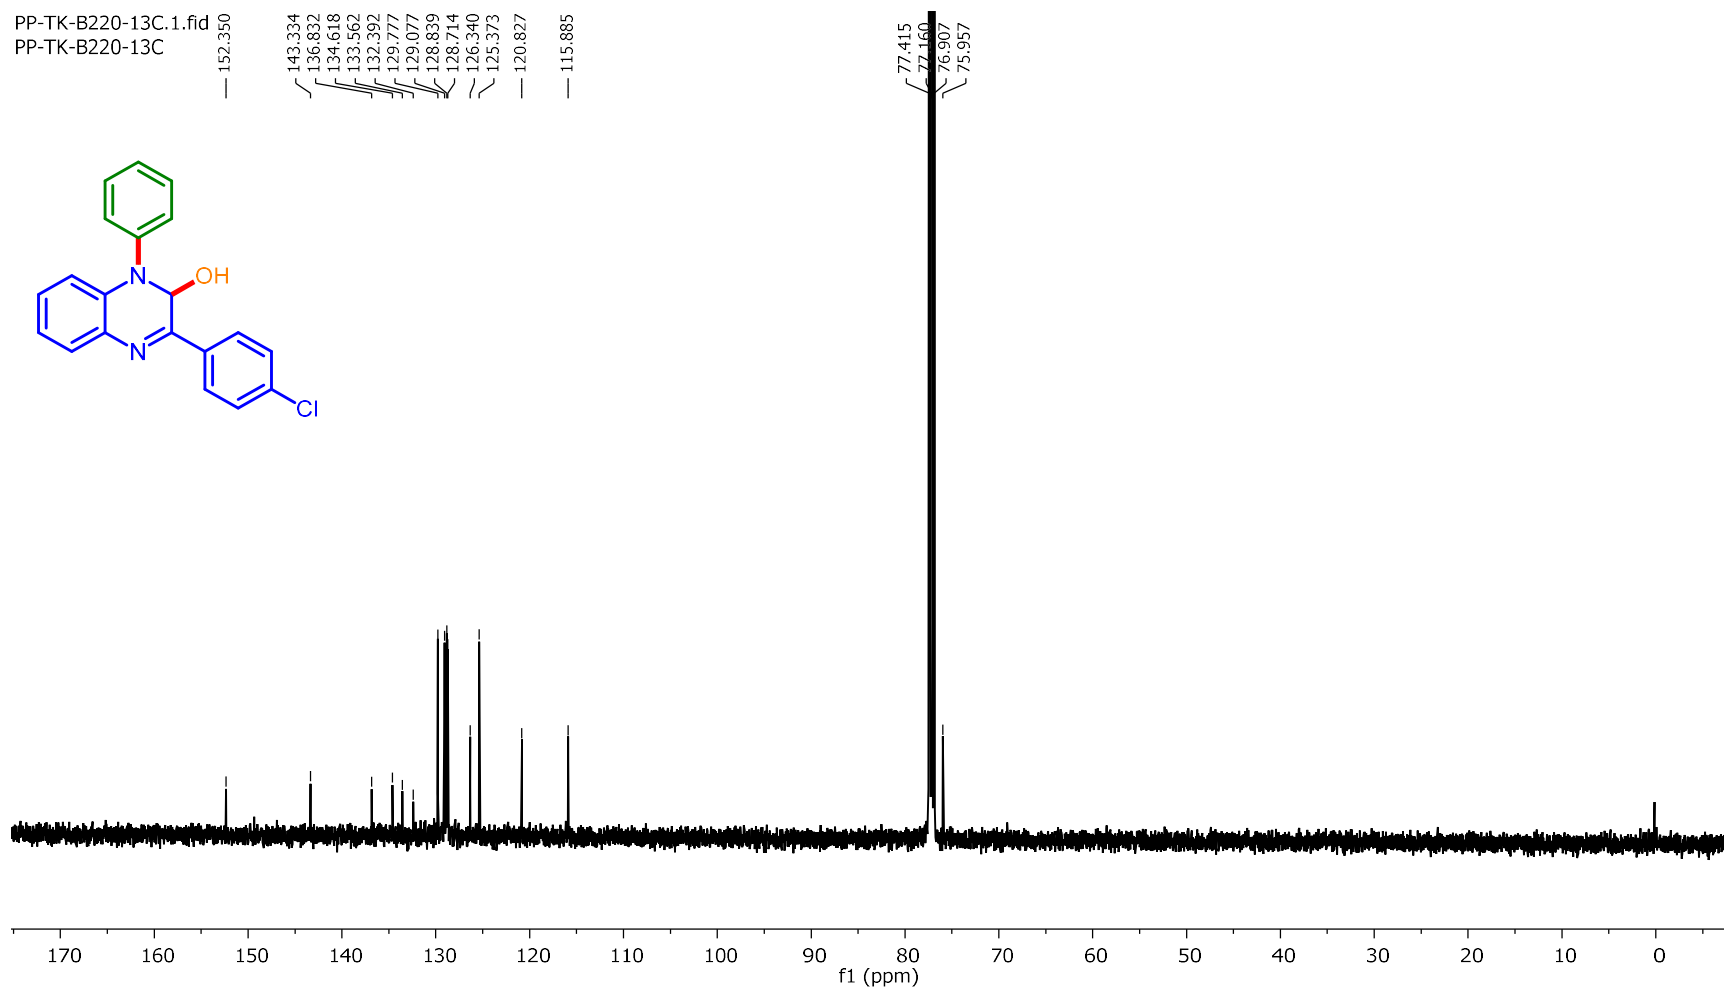

3-(4-Chlorophenyl)-1-phenyl-1,2-dihydroquinoxalin-2-ol (3ga):  $^{13}\text{C}\{^1\text{H}\}$  NMR ( $\text{CDCl}_3$ , 126 MHz)

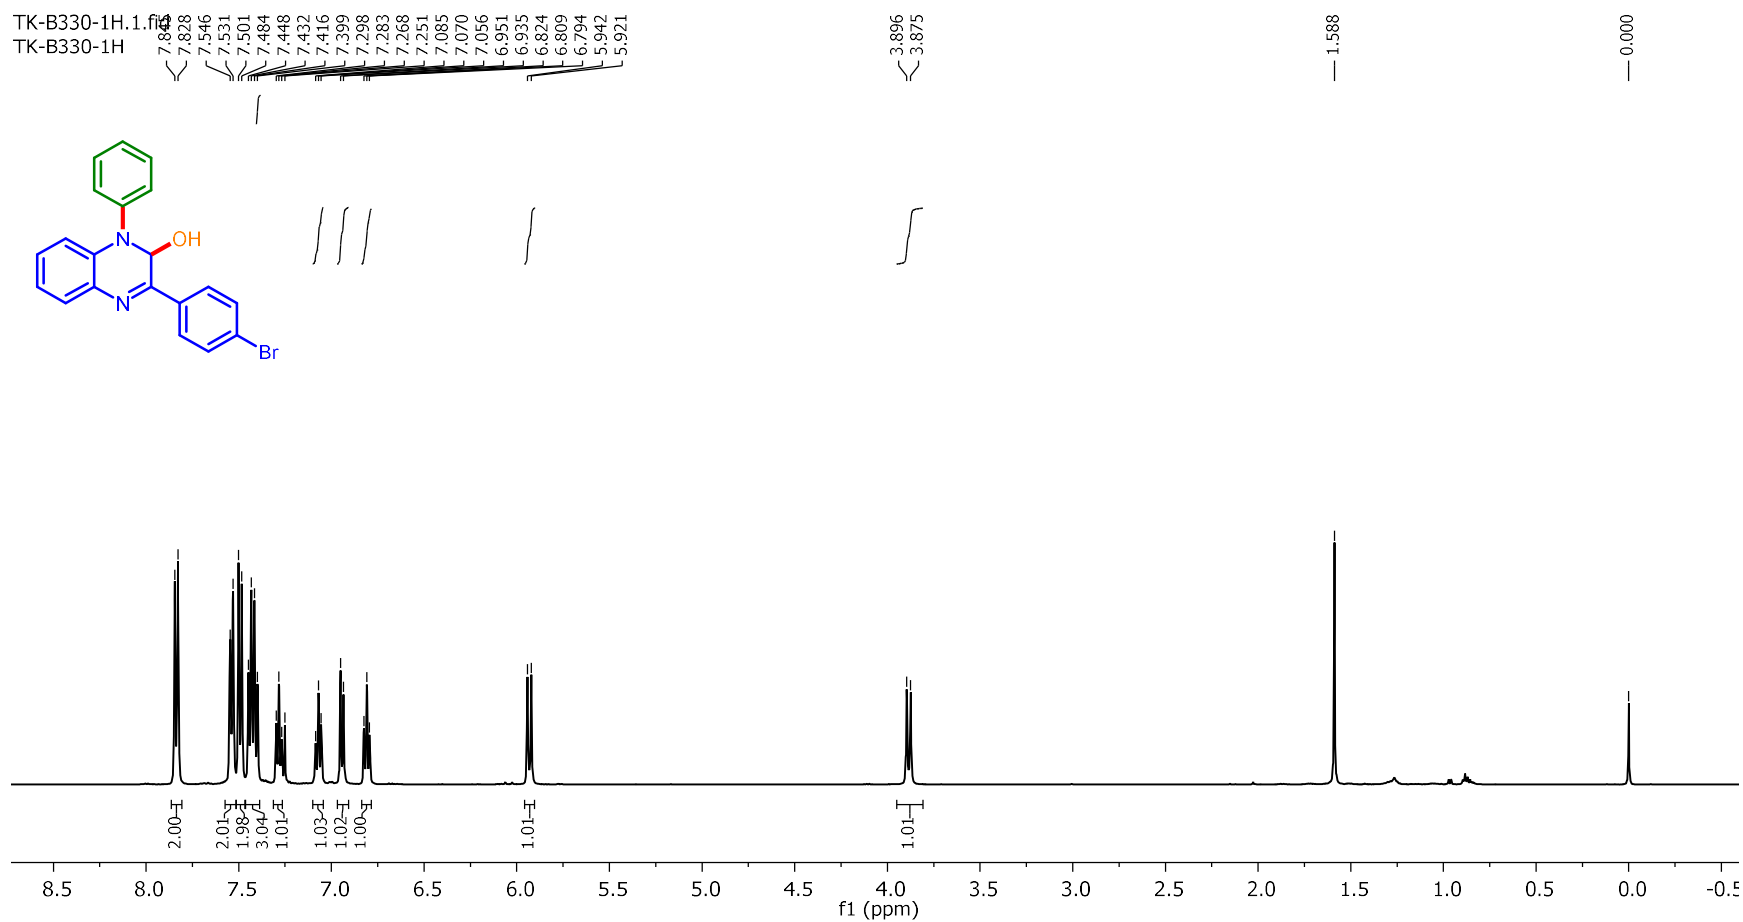

**3-(4-Bromophenyl)-1-phenyl-1,2-dihydroquinoxalin-2-ol (3ha):<sup>1</sup>H NMR (CDCl<sub>3</sub>, 500 MHz)**

TK-B330-13C.1.fid  
TK-B330-13C

152.083  
143.344  
134.735  
133.416  
132.284  
131.904  
129.726  
129.024  
128.695  
126.293  
125.421  
125.351  
120.729  
115.602

77.415  
77.160  
76.907  
76.013

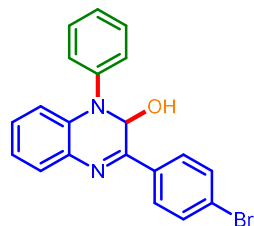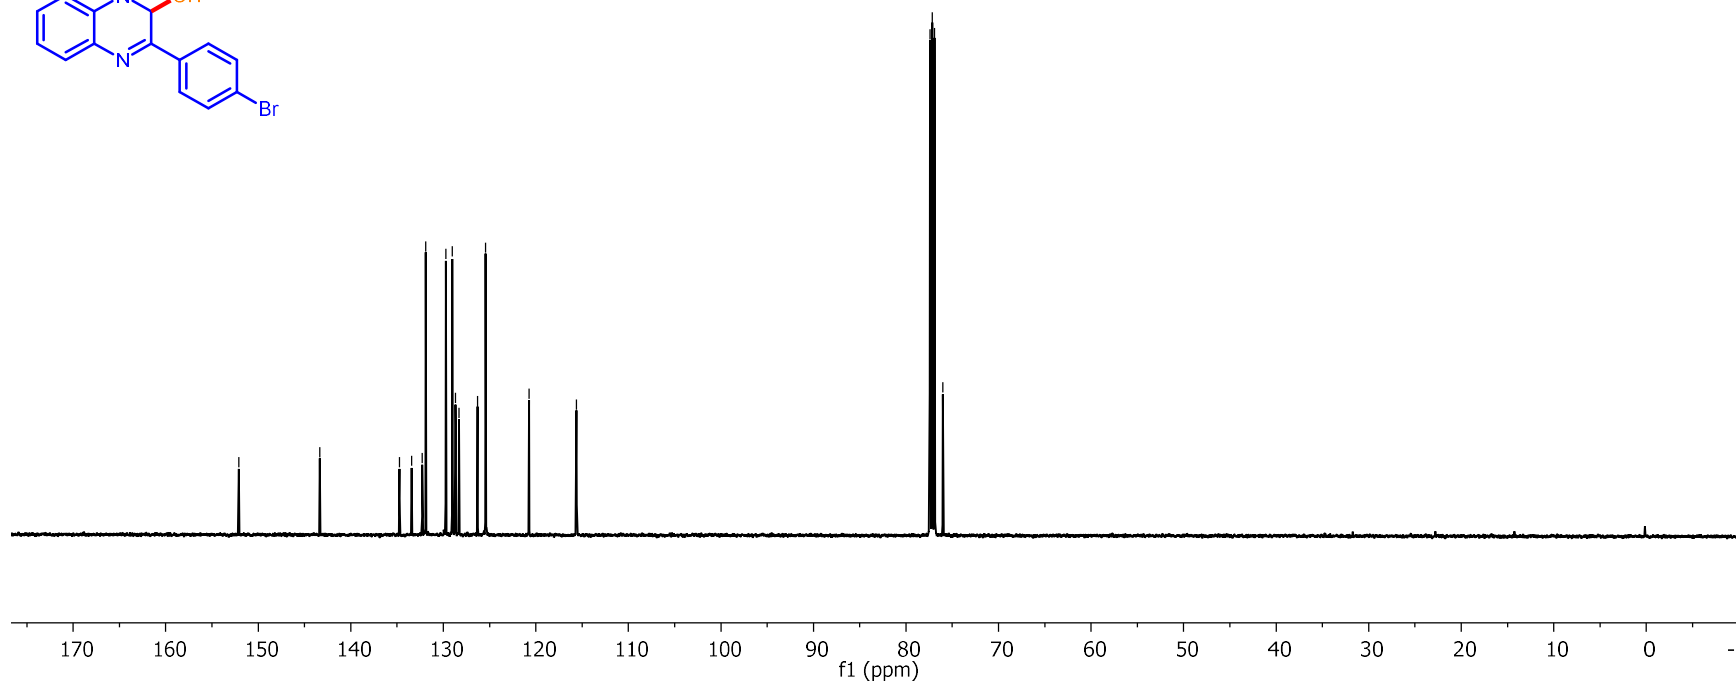

**3-(4-Bromophenyl)-1-phenyl-1,2-dihydroquinoxalin-2-ol (3ha):  $^{13}\text{C}\{^1\text{H}\}$  NMR ( $\text{CDCl}_3$ , 126 MHz)**



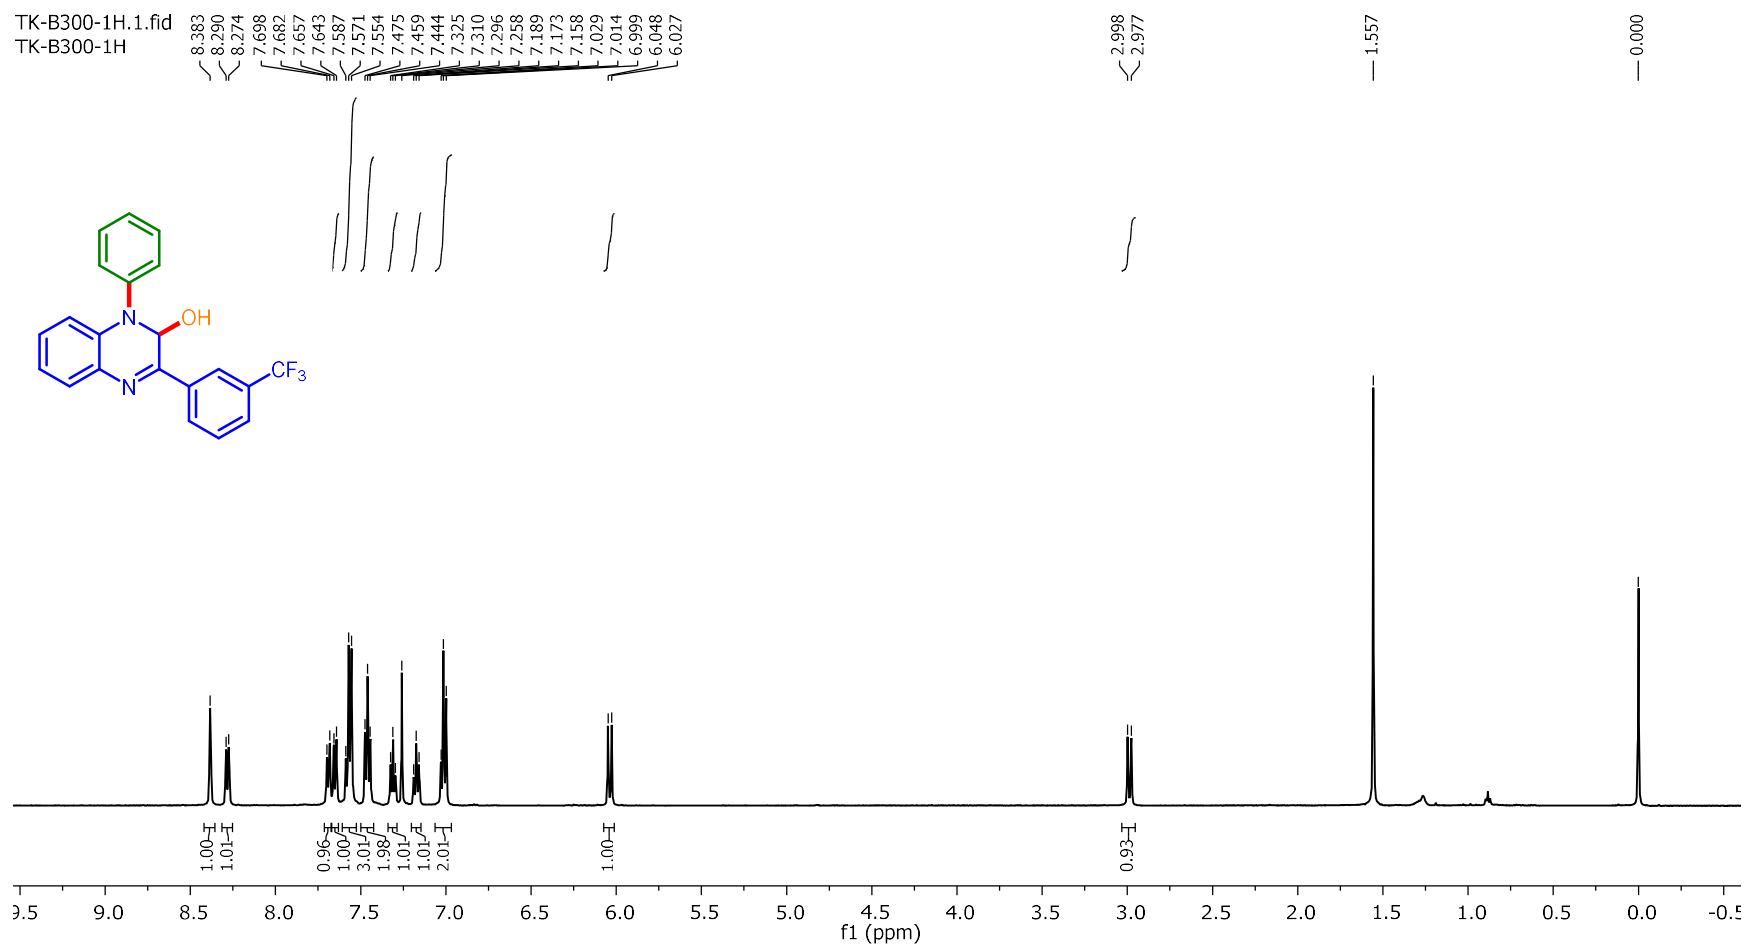

**1-Phenyl-3-(3-(trifluoromethyl)phenyl)-1,2-dihydroquinoxalin-2-ol (3ia): <sup>1</sup>H NMR (CDCl<sub>3</sub>, 500 MHz)**

TK-B300-13C.5.fid  
TK-B300-13C

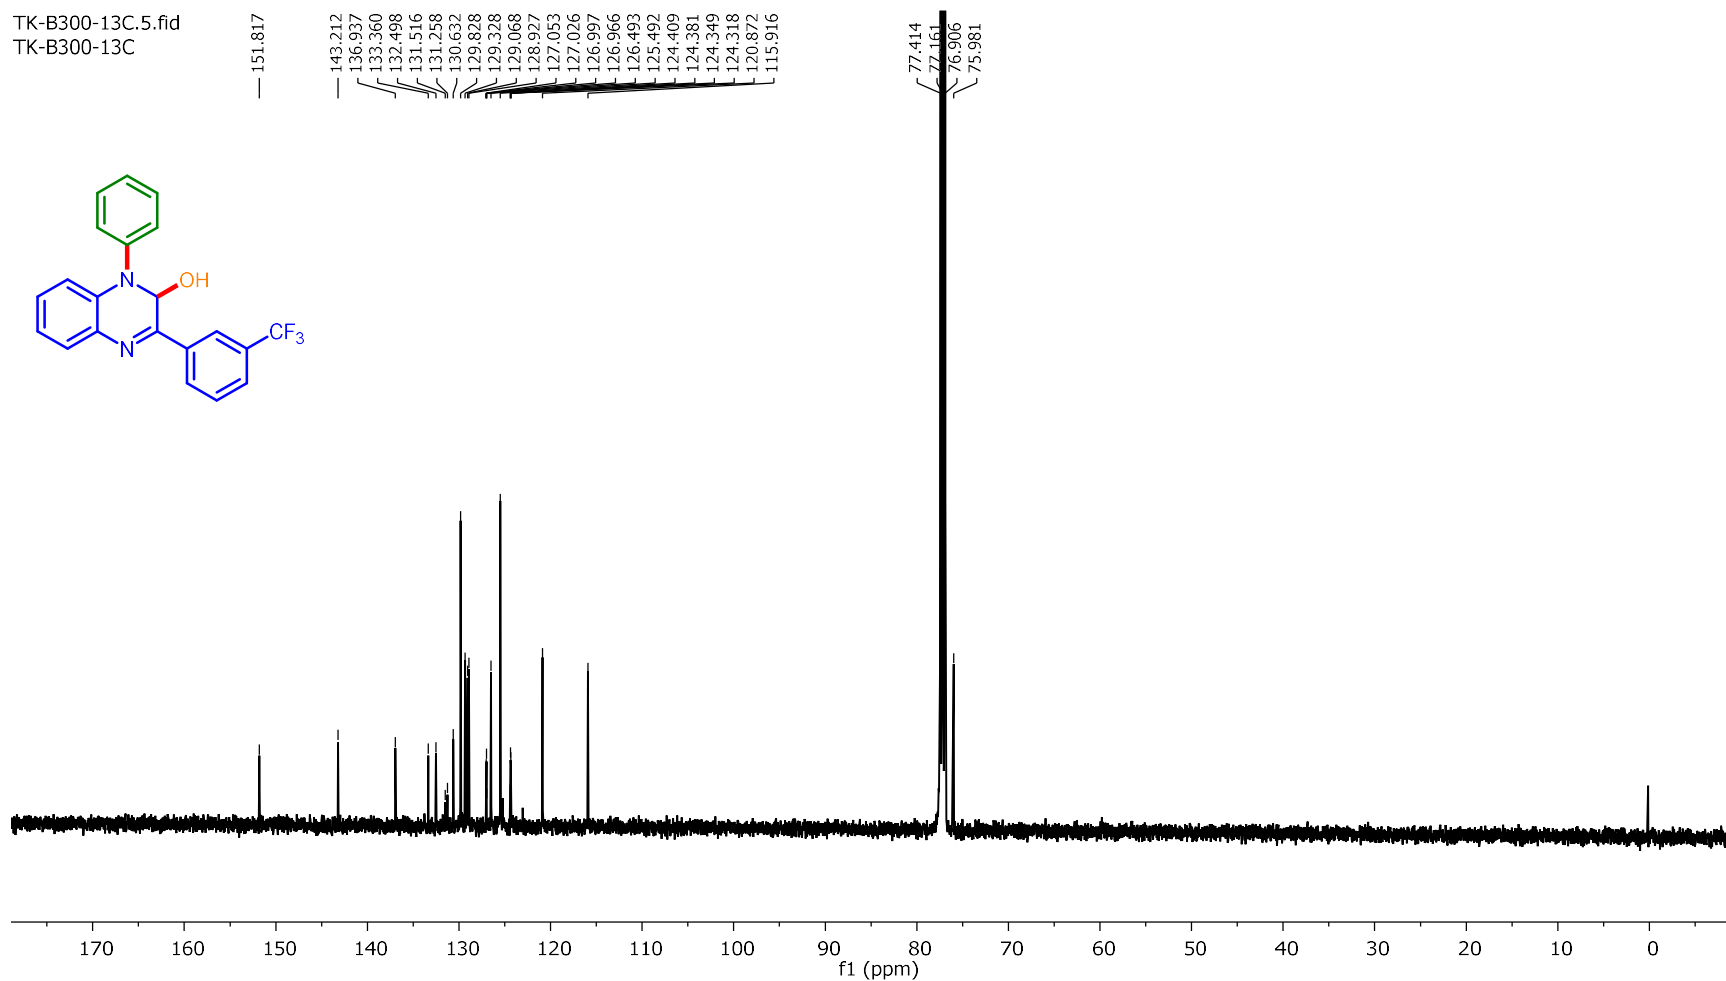

**1-Phenyl-3-(3-(trifluoromethyl)phenyl)-1,2-dihydroquinoxalin-2-ol (3ia):  $^{13}\text{C}\{^1\text{H}\}$  NMR ( $\text{CDCl}_3$ , 126 MHz)**

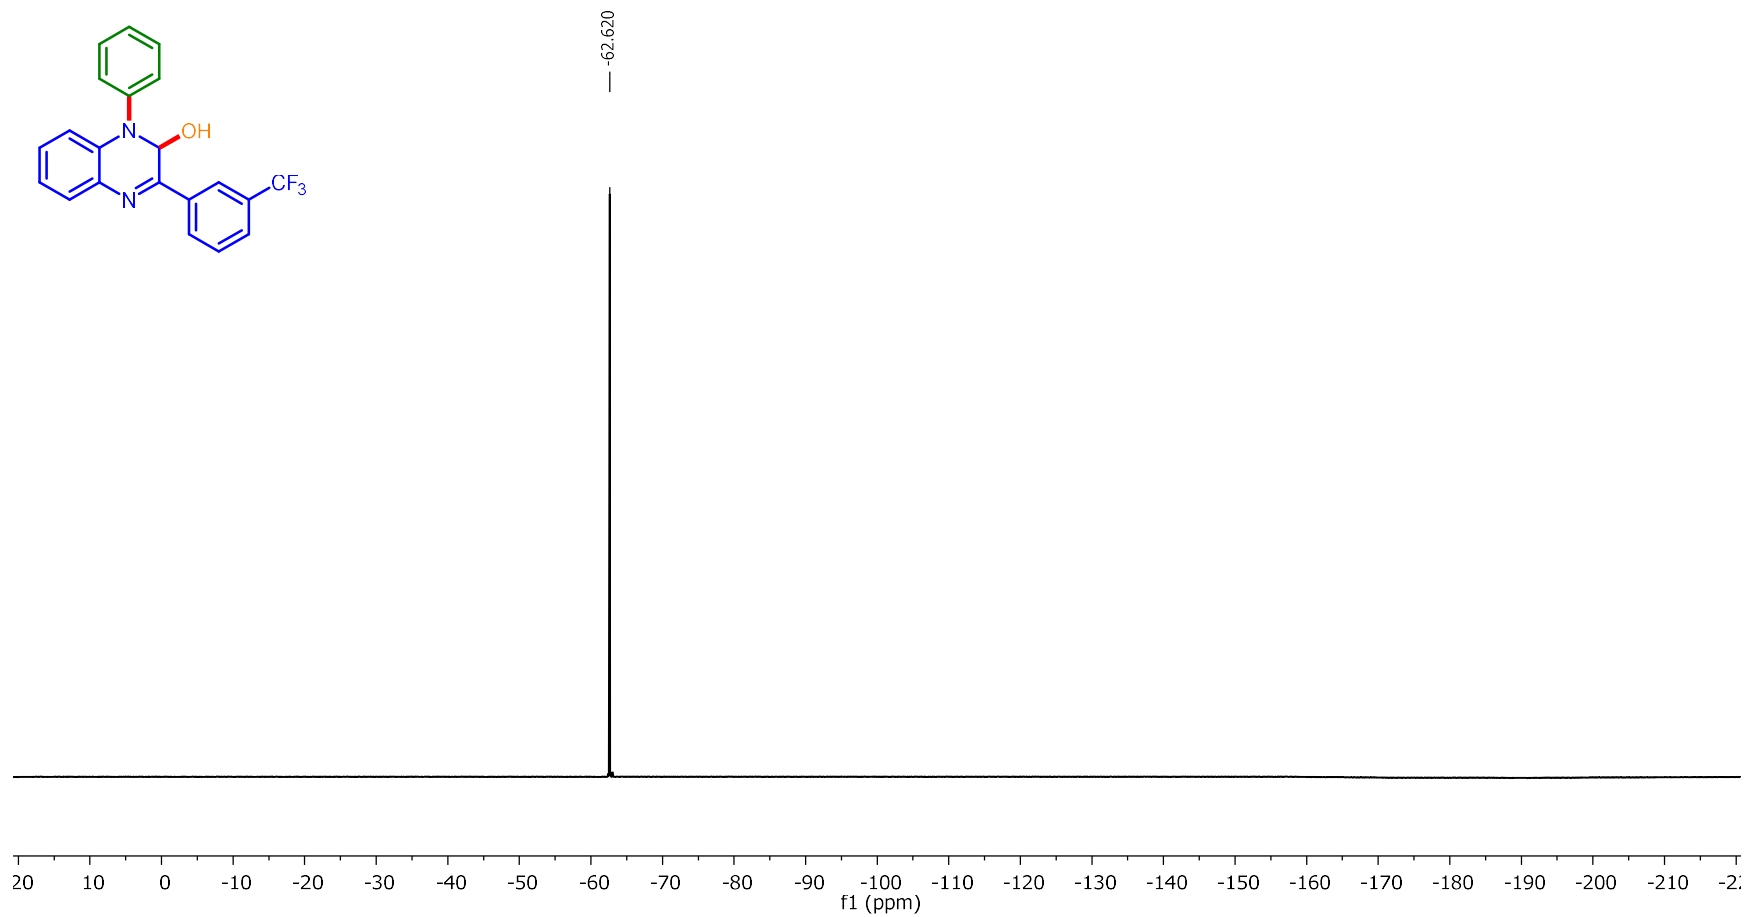

**1-Phenyl-3-(3-(trifluoromethyl)phenyl)-1,2-dihydroquinoxalin-2-ol (3ia):  $^{19}\text{F}$  NMR ( $\text{CDCl}_3$ , 471 MHz)**

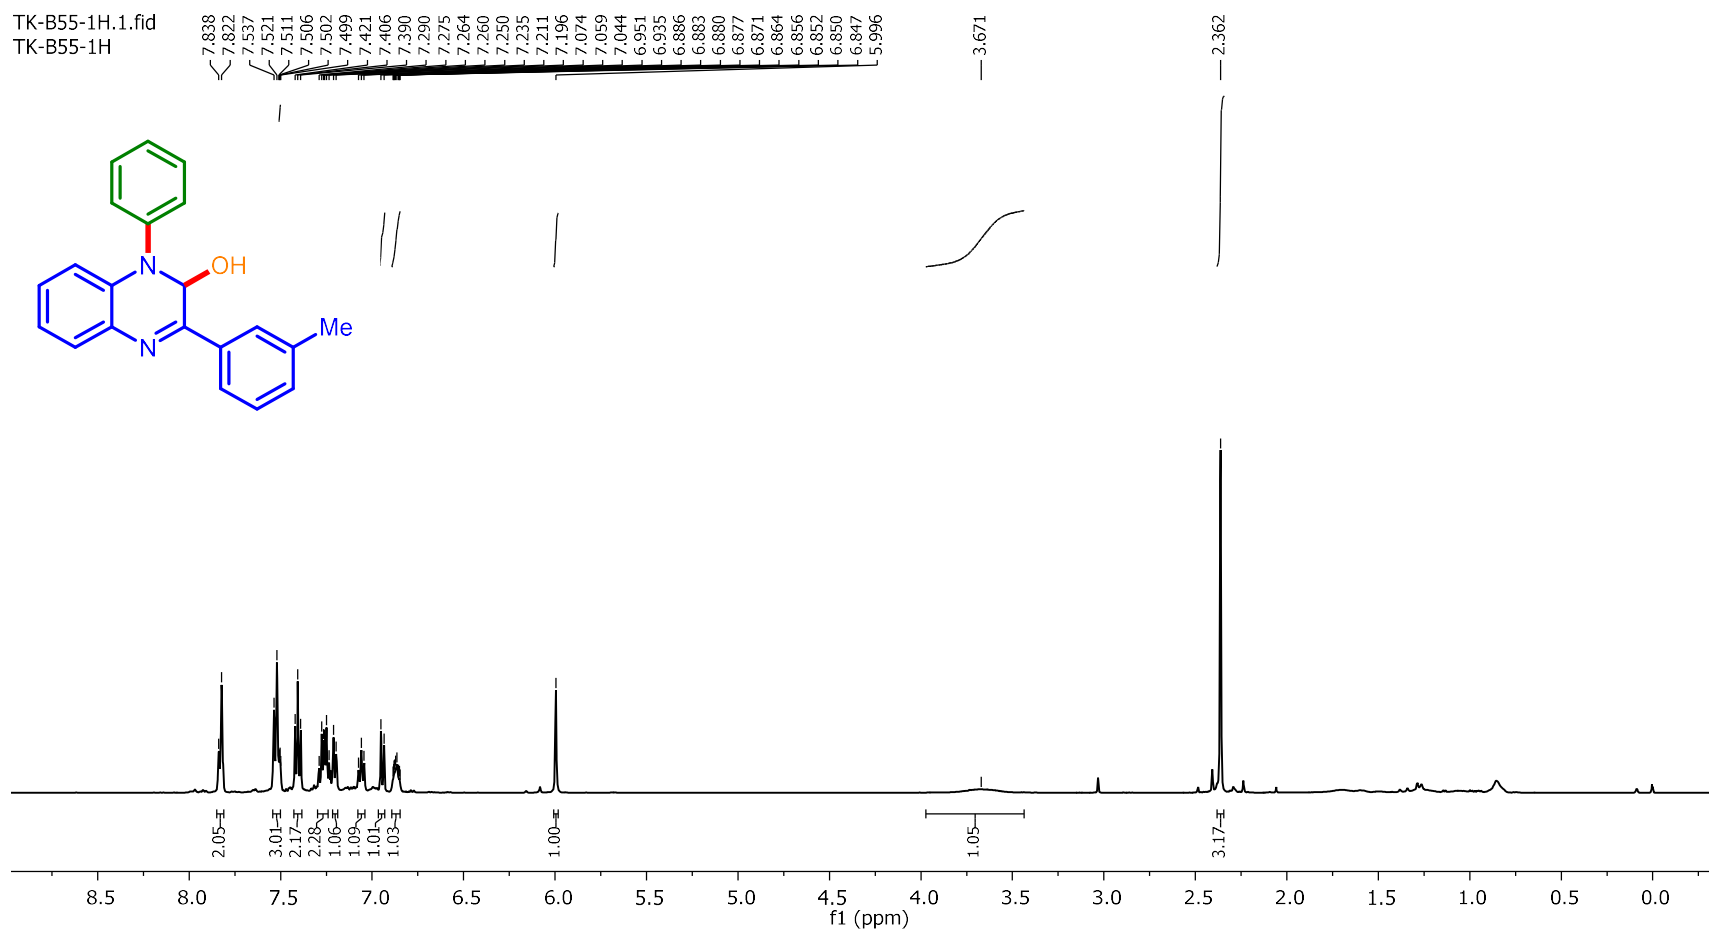

**1-Phenyl-3-(*m*-tolyl)-1,2-dihydroquinoxalin-2-ol (3ja): <sup>1</sup>H NMR (CDCl<sub>3</sub>, 500MHz)**

TK-B55-13C.3  
TK-B55-13C

153.678  
143.506  
138.338  
135.966  
133.752  
132.385  
131.399  
129.652  
128.601  
128.333  
128.238  
128.105  
126.041  
125.329  
124.784  
120.563  
115.652

77.414  
77.161  
76.907  
76.126

21.570

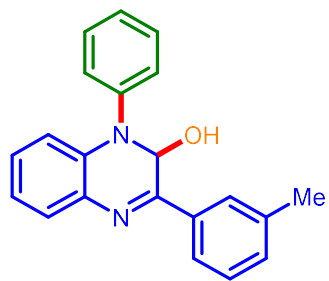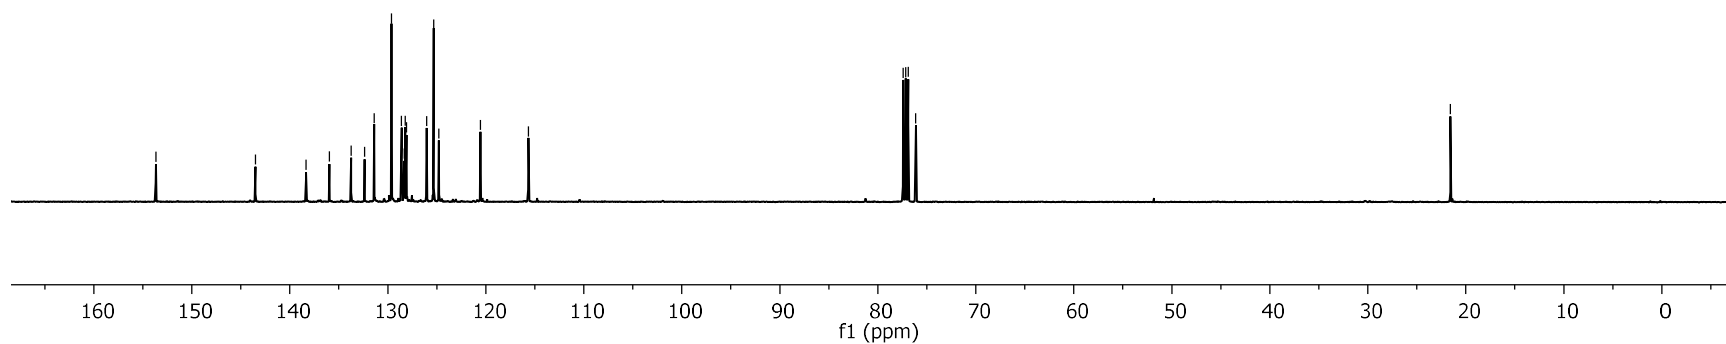

**1-Phenyl-3-(m-tolyl)-1,2-dihydroquinoxalin-2-ol (3ja):  $^{13}\text{C}\{^1\text{H}\}$  NMR ( $\text{CDCl}_3$ , 126 MHz)**

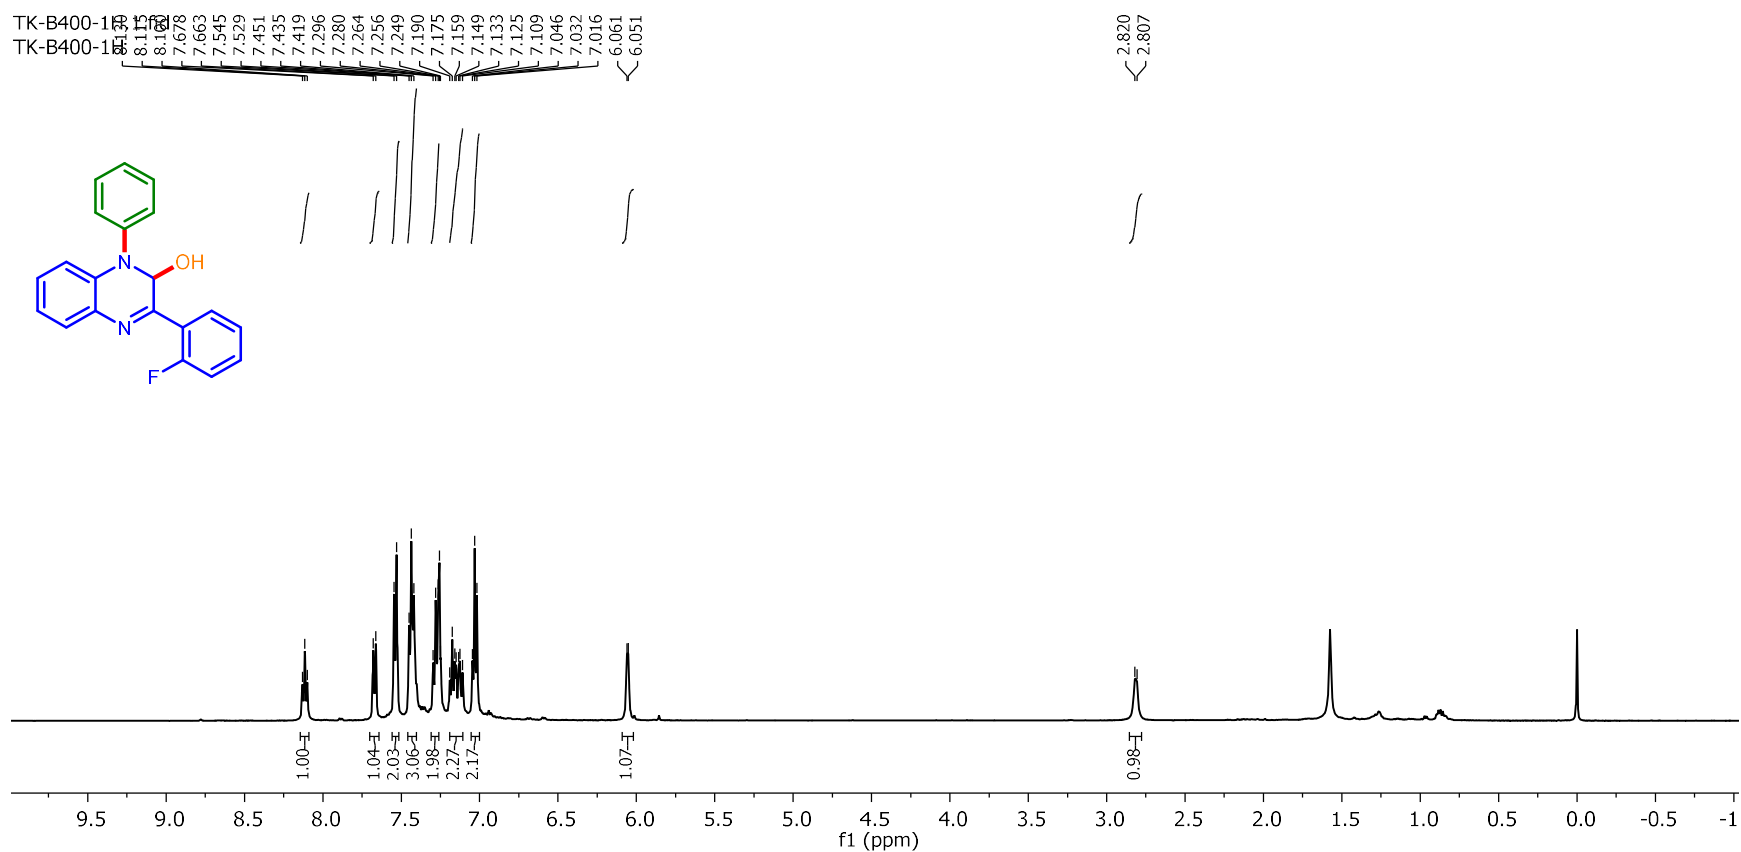

**3-(2-Fluorophenyl)-1-phenyl-1,2-dihydroquinoxalin-2-ol (3ka): <sup>1</sup>H NMR (CDCl<sub>3</sub>, 500MHz)**

TK-B400-13C.23.fid  
TK-B400-13C

— 162.505  
— 160.014

∨ 150.997  
∨ 150.965

— 143.224  
— 133.841  
— 132.766  
— 132.161  
— 132.073  
— 131.438  
— 131.409  
— 129.695  
— 128.704  
— 126.194  
— 125.273  
— 124.910  
— 124.878  
— 120.645  
— 116.666  
— 116.434  
— 115.833

∨ 77.478  
∨ 77.161  
∨ 76.840  
∨ 76.725

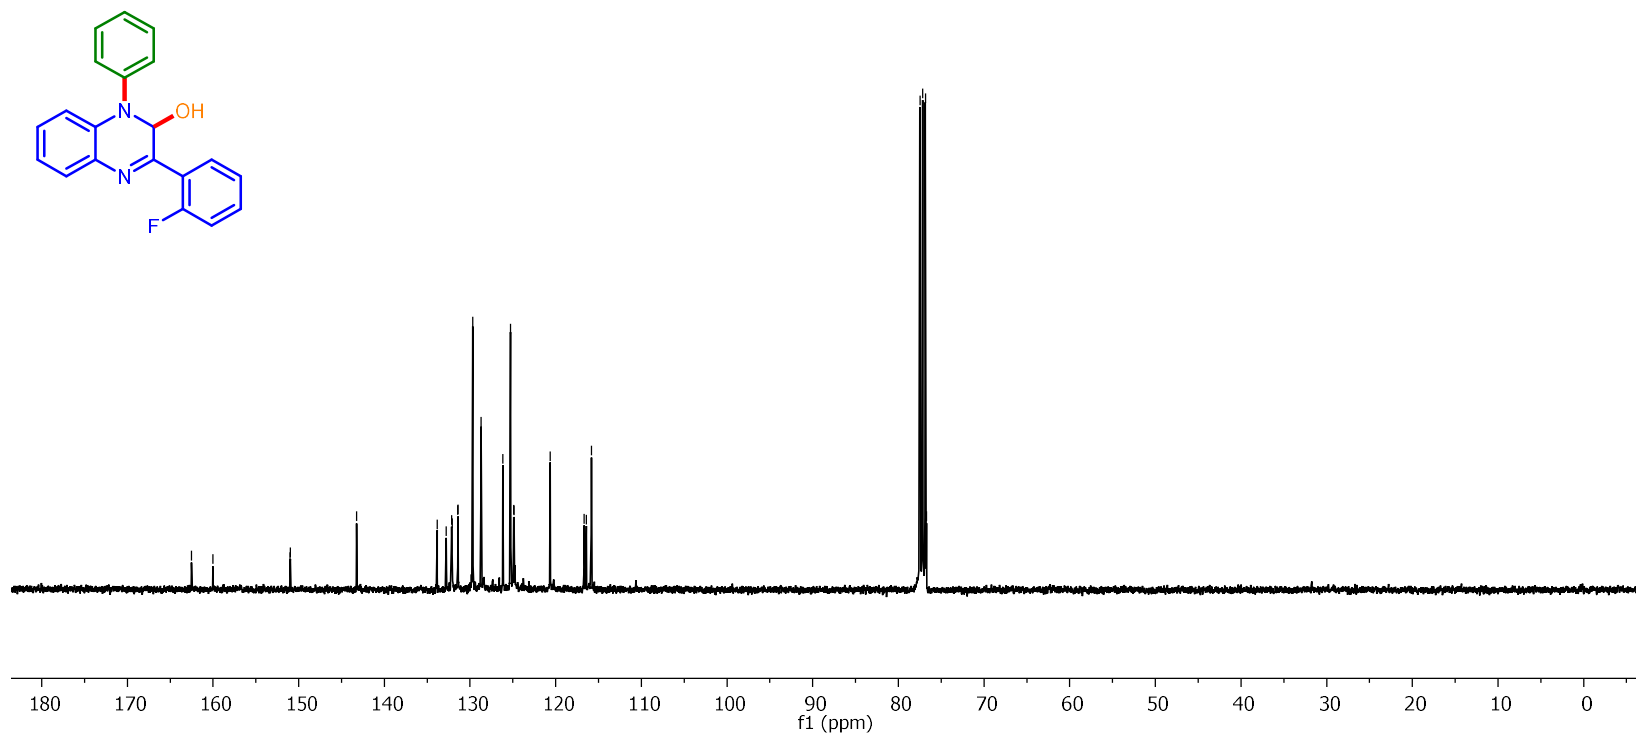

**3-(2-Fluorophenyl)-1-phenyl-1,2-dihydroquinoxalin-2-ol (3ka):  $^{13}\text{C}\{^1\text{H}\}$  NMR ( $\text{CDCl}_3$ , 101 MHz)**

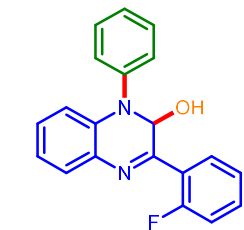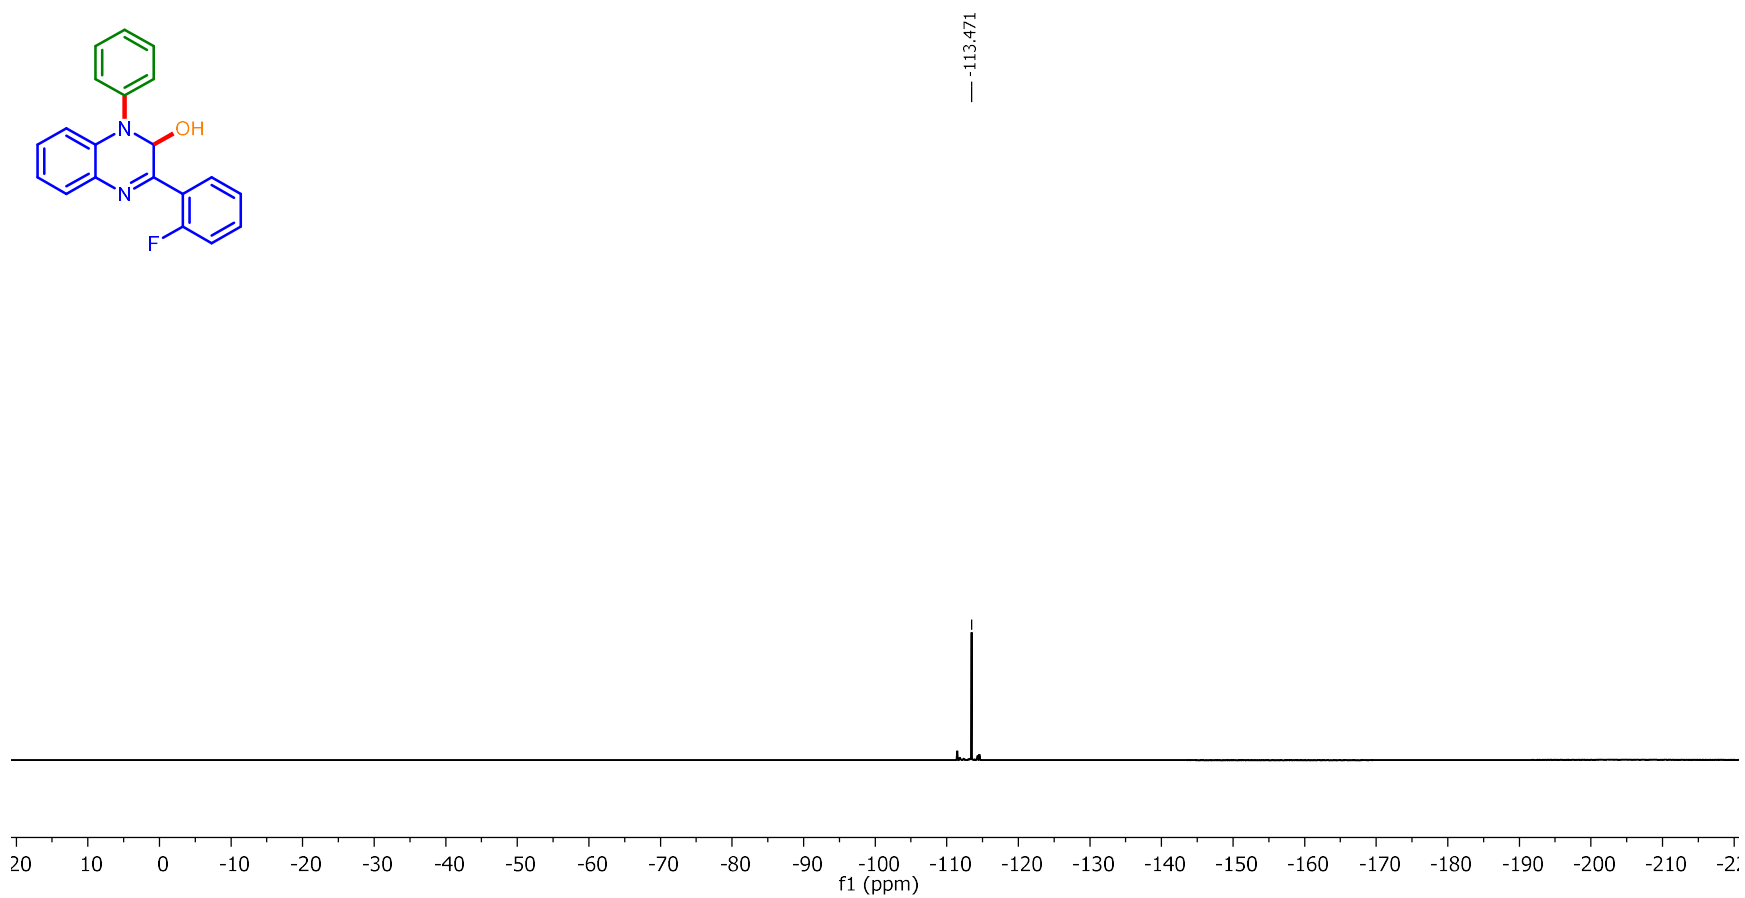

**3-(2-Fluorophenyl)-1-phenyl-1,2-dihydroquinoxalin-2-ol (3ka):  $^{19}\text{F}$  NMR ( $\text{CDCl}_3$ , 376 MHz)**



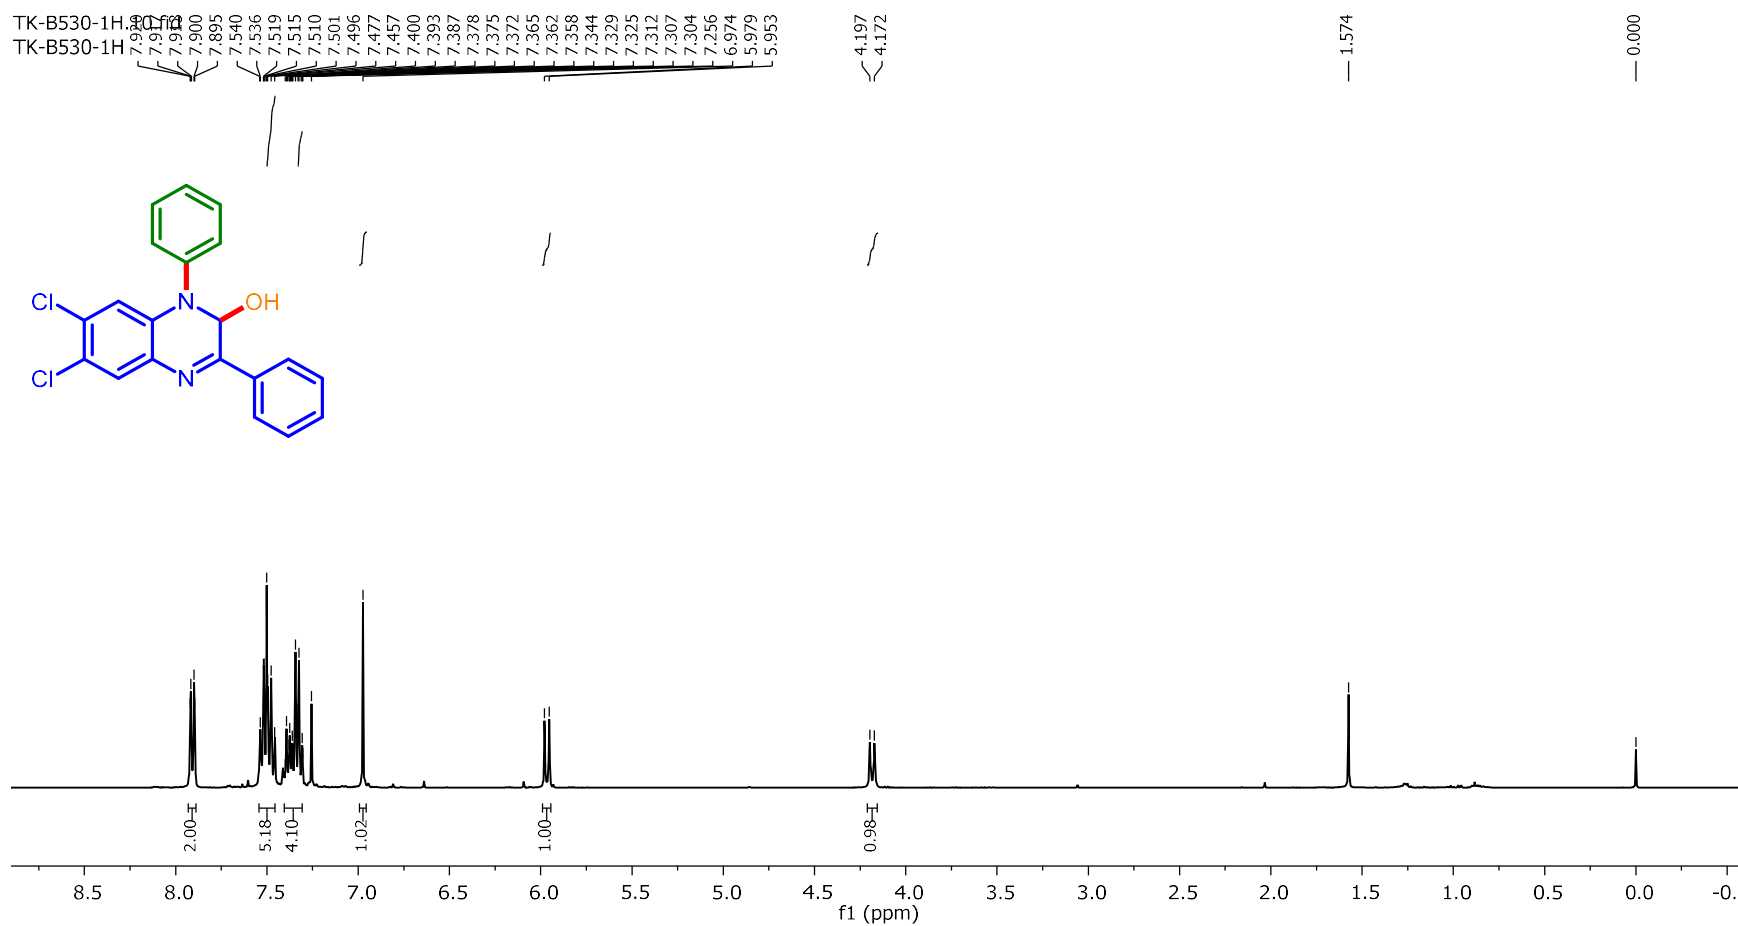

**6,7-Dichloro-1,3-diphenyl-1,2-dihydroquinoxalin-2-ol (3la):  $^1\text{H}$  NMR ( $\text{CDCl}_3$ , 400 MHz)**

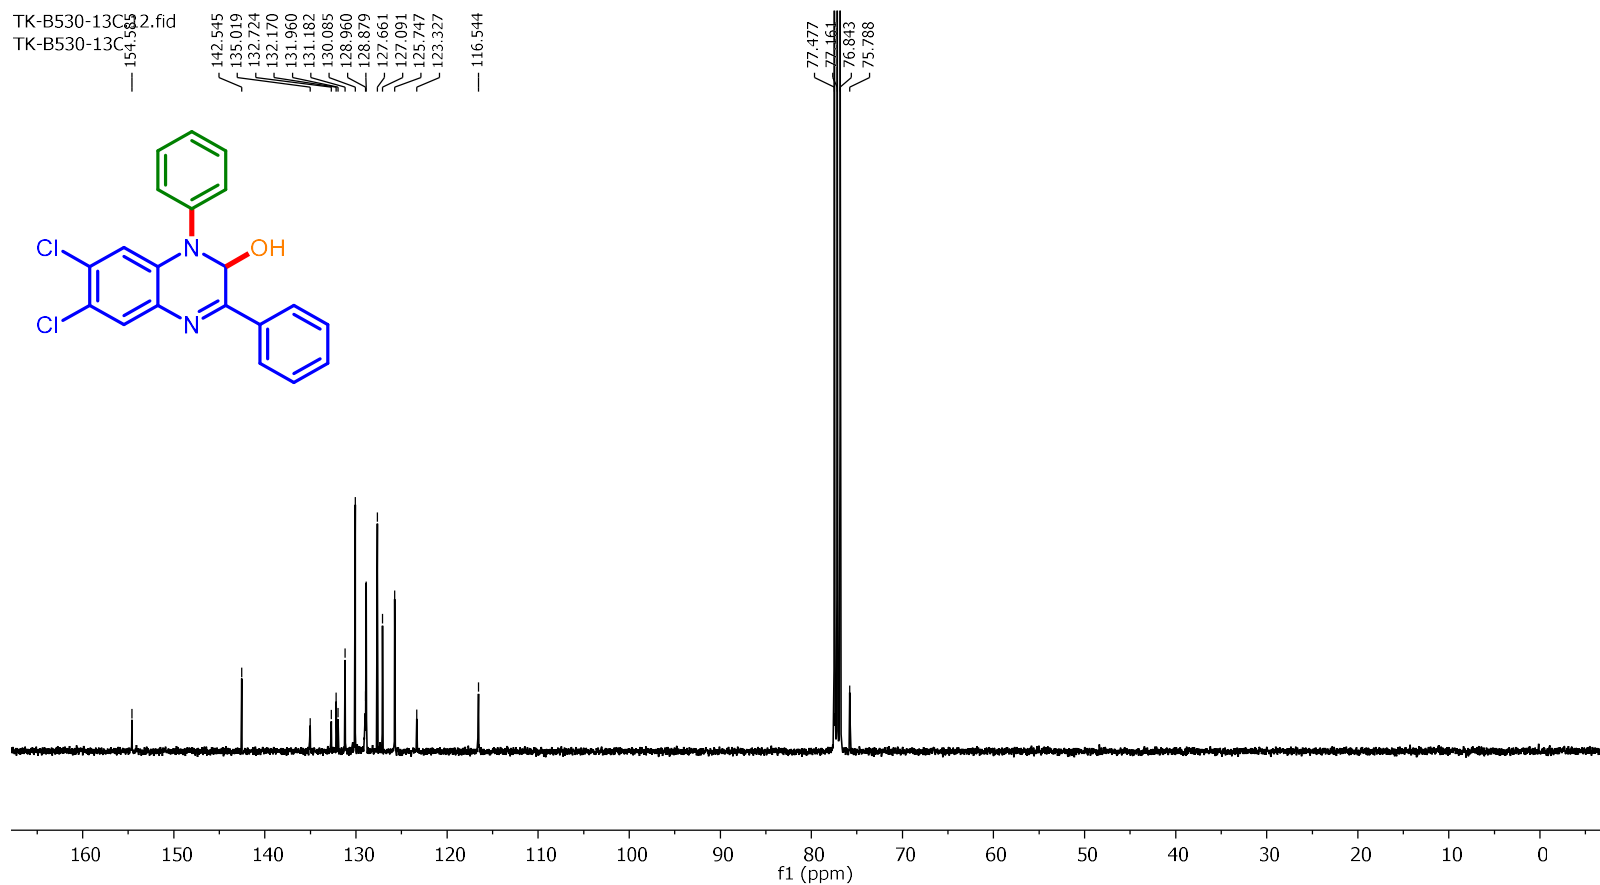

**6,7-Dichloro-1,3-diphenyl-1,2-dihydroquinoxalin-2-ol (3la):  $^{13}\text{C}\{^1\text{H}\}$  NMR ( $\text{CDCl}_3$ , 101 MHz)**

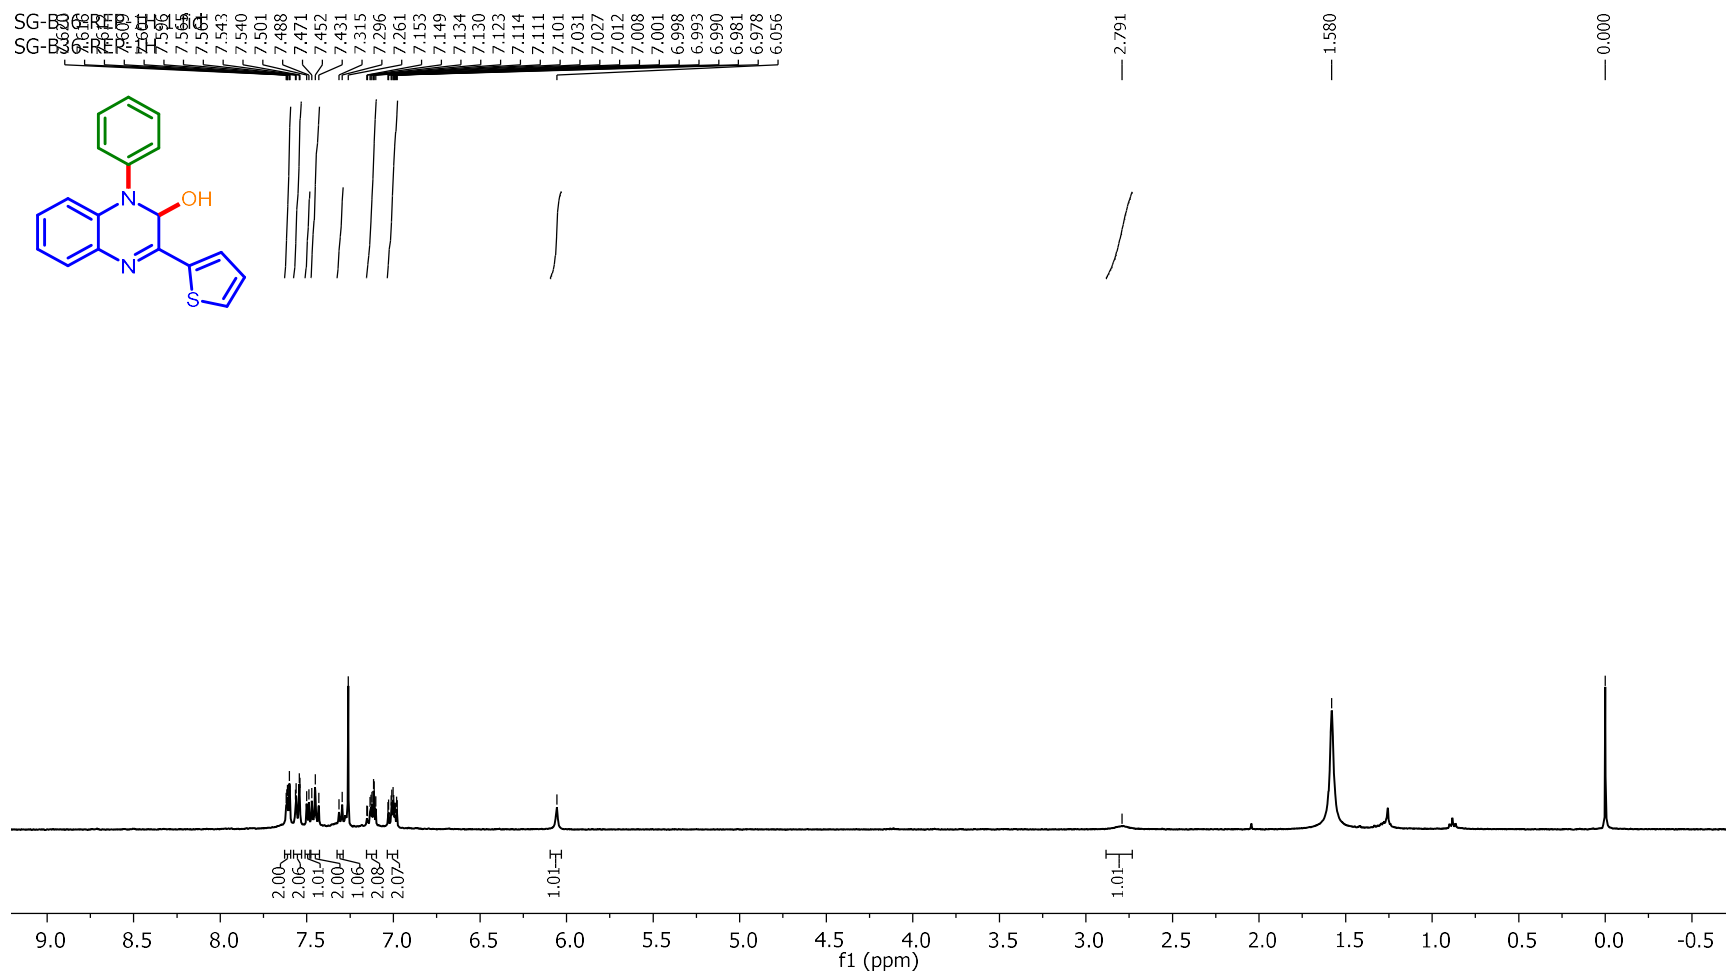

1-Phenyl-3-(thiophen-2-yl)-1,2-dihydroquinoxalin-2-ol (3ma): <sup>1</sup>H NMR (CDCl<sub>3</sub>, 500MHz)

TK-B3602-13C.13  
TK-B3602-13C

149.381  
143.404  
142.894  
133.622  
132.574  
130.389  
129.764  
128.367  
128.311  
128.197  
128.123  
126.262  
125.363  
120.874  
115.915

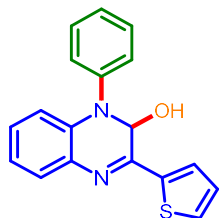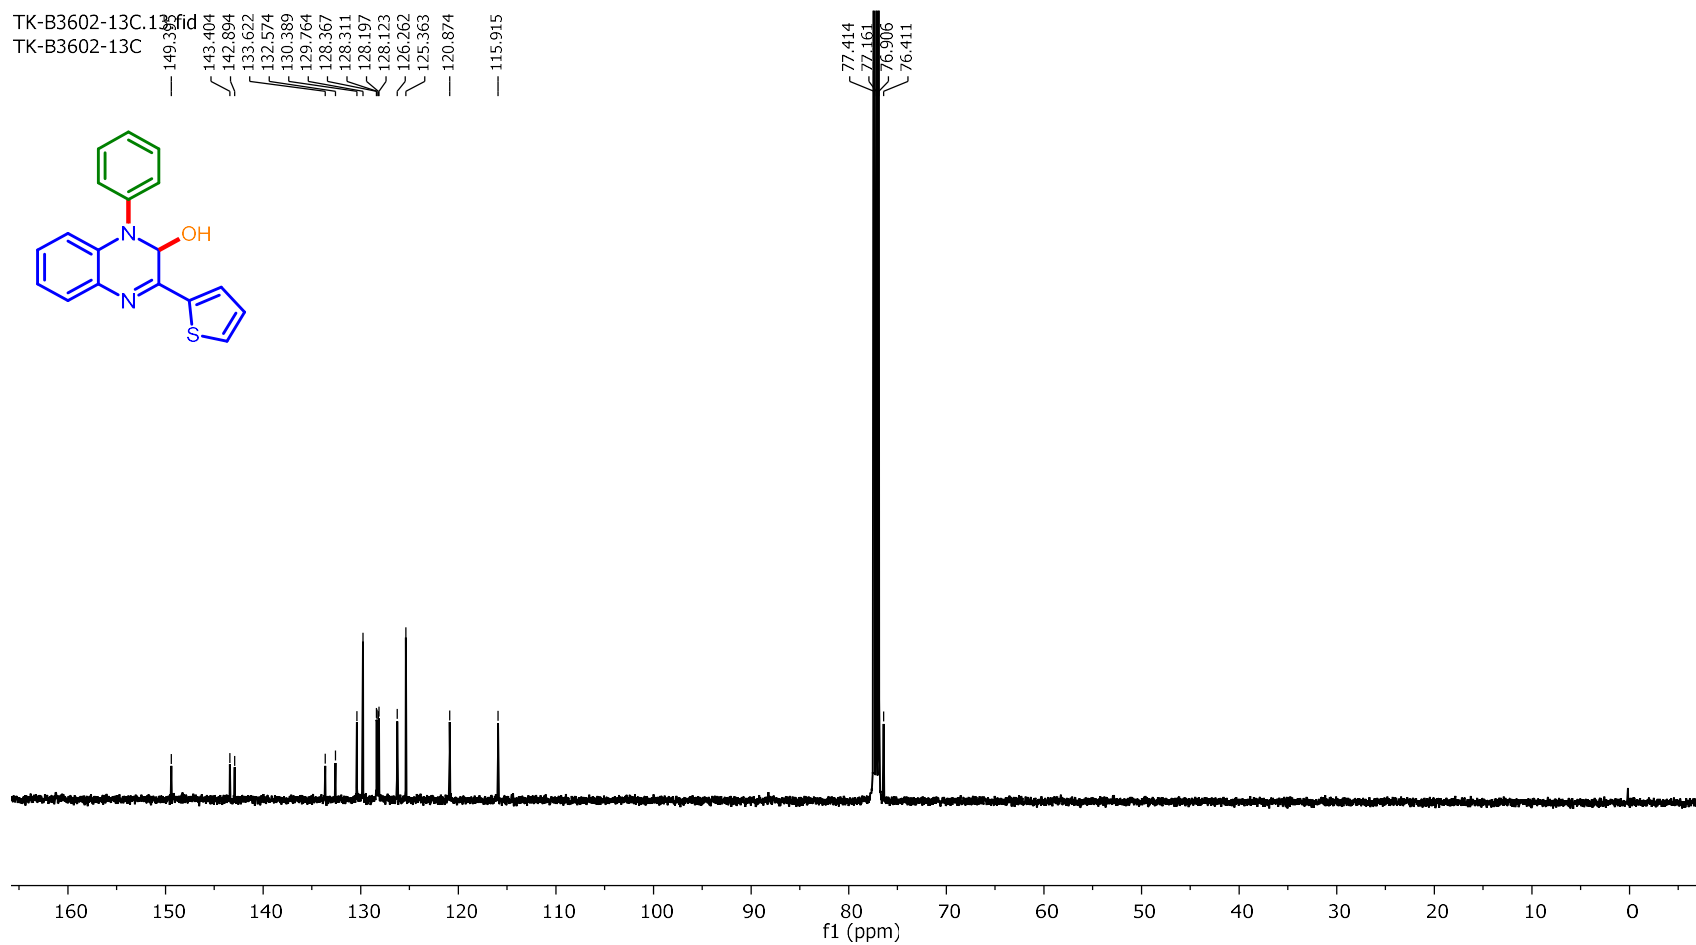

1-Phenyl-3-(thiophen-2-yl)-1,2-dihydroquinoxalin-2-ol (3ma):  $^{13}\text{C}\{^1\text{H}\}$  NMR ( $\text{CDCl}_3$ , 126 MHz)

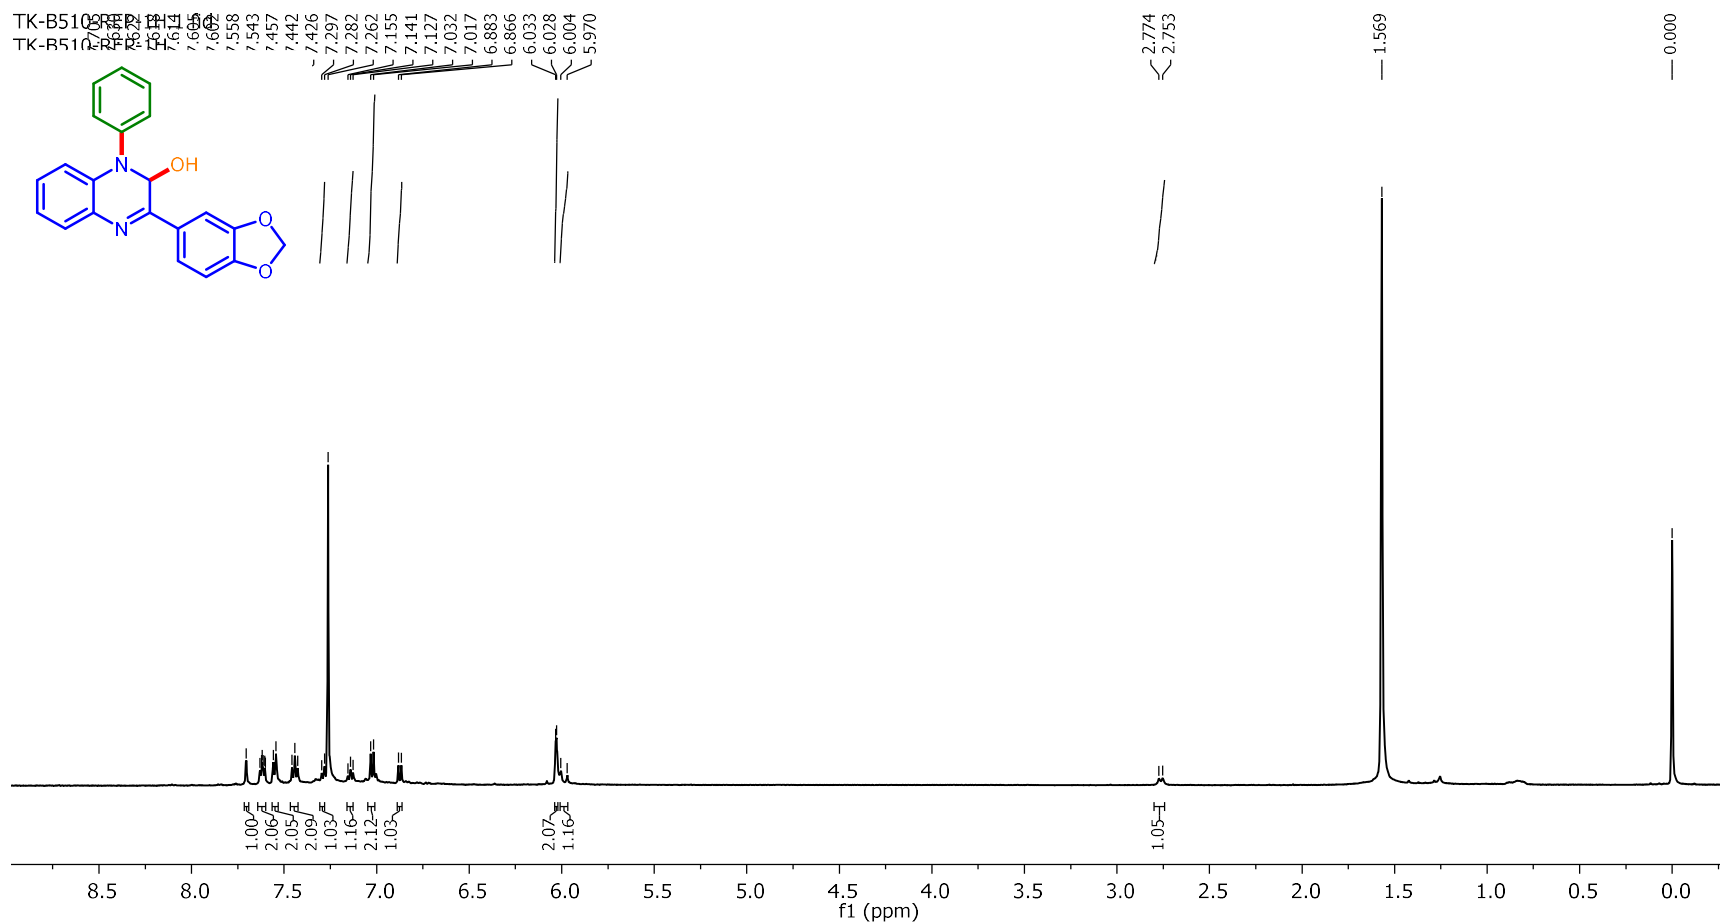

**3-(Benzo[d][1,3]dioxol-5-yl)-1-phenyl-1,2-dihydroquinoxalin-2-ol (3na): <sup>1</sup>H NMR (CDCl<sub>3</sub>, 400 MHz)**

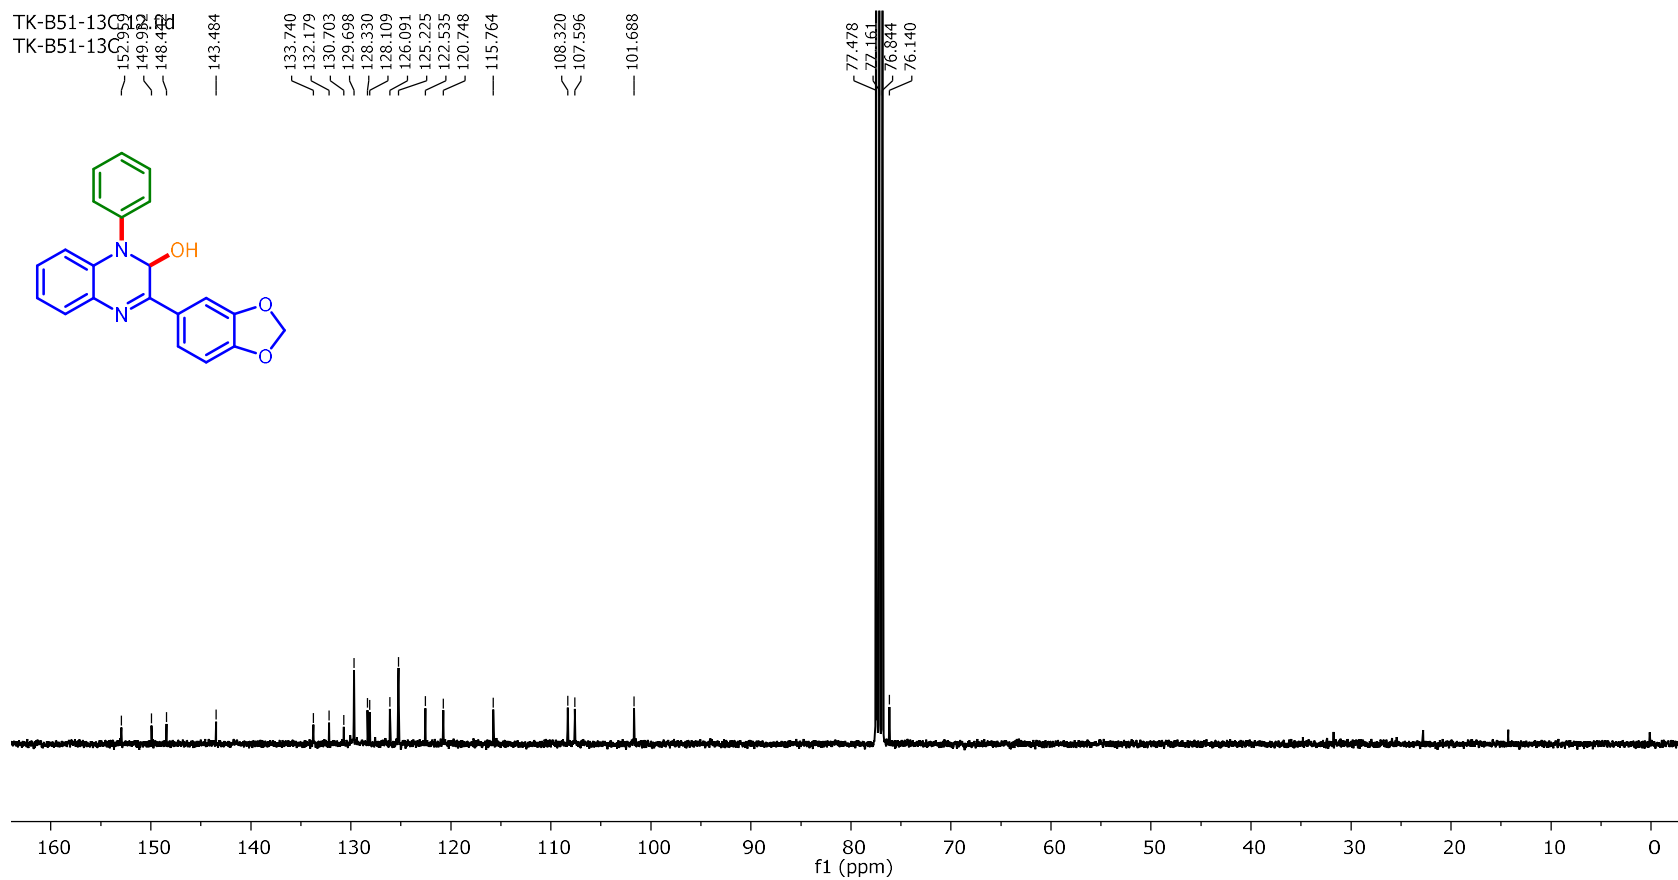

3-(Benzo[d][1,3]dioxol-5-yl)-1-phenyl-1,2-dihydroquinoxalin-2-ol (3na):  $^{13}\text{C}\{^1\text{H}\}$  NMR ( $\text{CDCl}_3$ , 101 MHz)

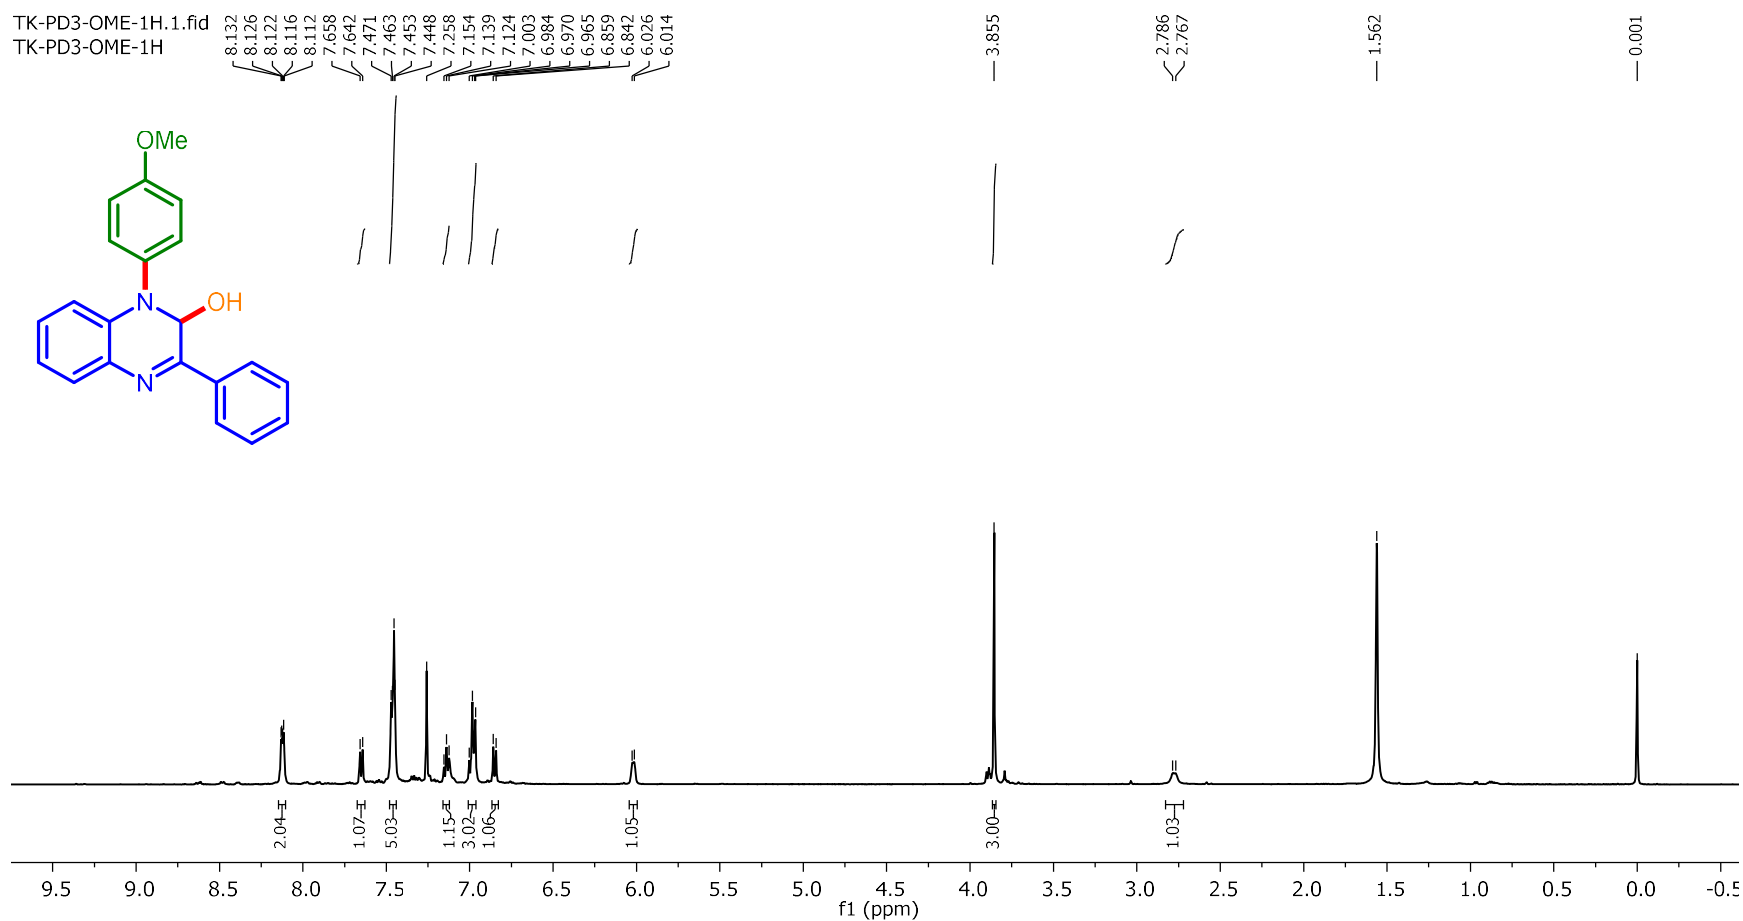

**1-(4-Methoxyphenyl)-3-phenyl-1,2-dihydroquinoxalin-2-ol (3ab):  $^1\text{H}$  NMR ( $\text{CDCl}_3$ , 500 MHz)**

TK-PD3-OME-13C.1.fid  
TK-PD3-OME-13C

— 158.329  
— 153.162

136.275  
136.231  
133.395  
133.286  
130.586  
128.863  
128.766  
128.543  
127.725  
127.522  
120.170  
115.361  
114.977

77.413  
77.160  
76.905  
76.339

— 55.718

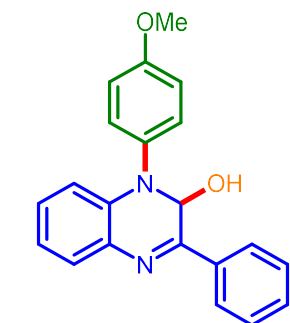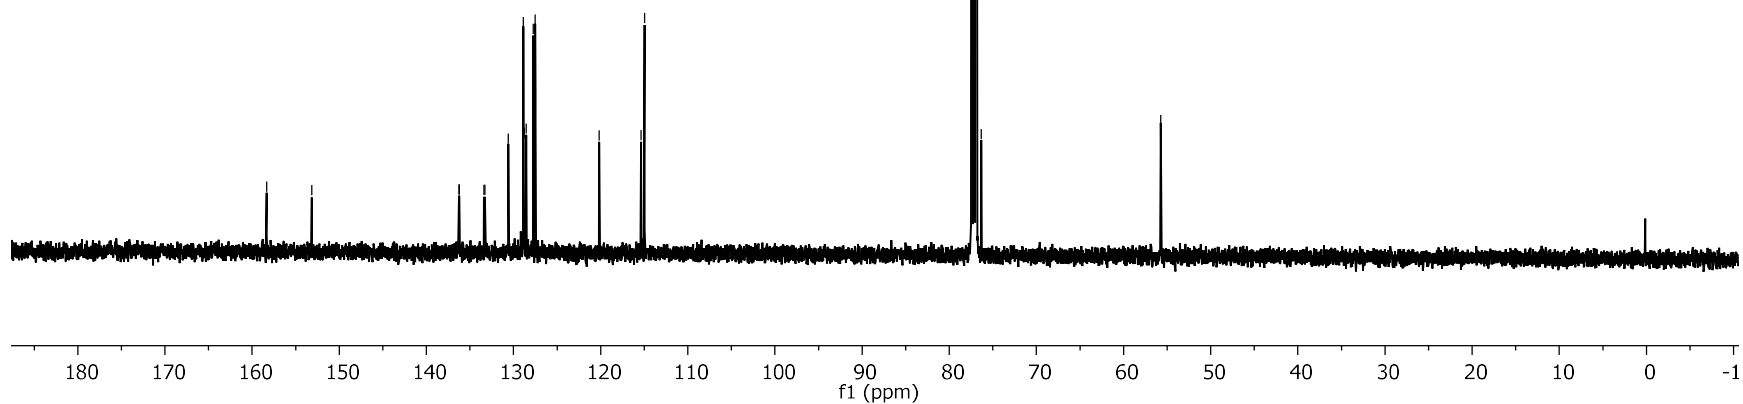

**1-(4-Methoxyphenyl)-3-phenyl-1,2-dihydroquinoxalin-2-ol (3ab):  $^{13}\text{C}\{^1\text{H}\}$  NMR ( $\text{CDCl}_3$ , 126 MHz)**



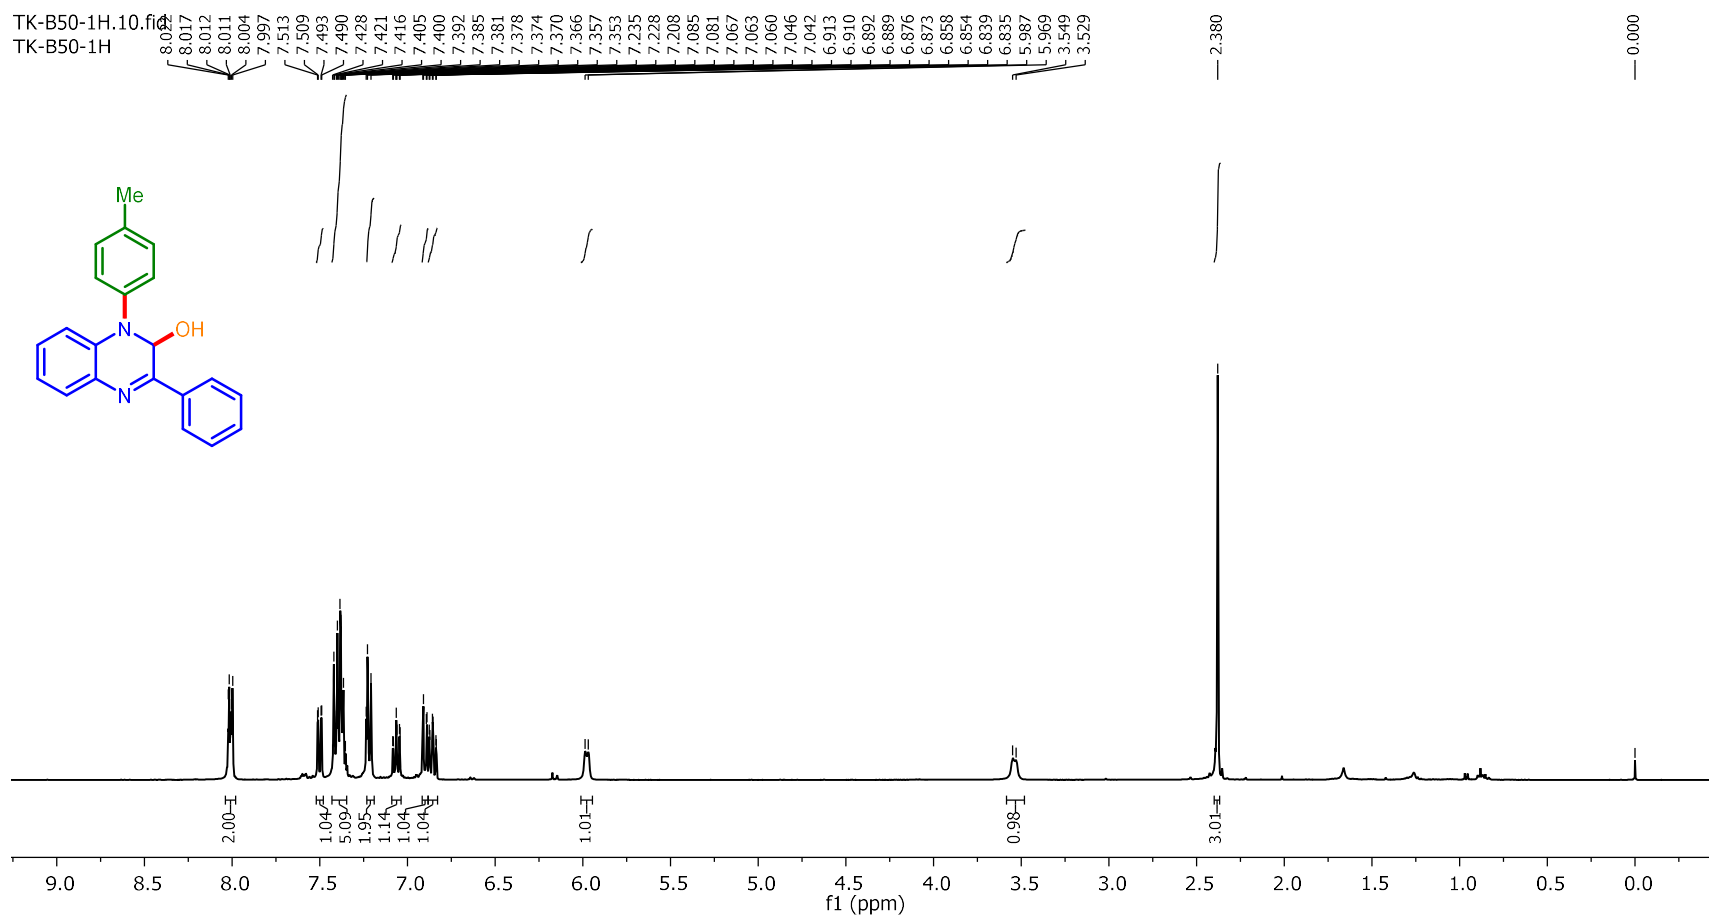

**3-Phenyl-1-(p-tolyl)-1,2-dihydroquinoxalin-2-ol (3ac):<sup>1</sup>H NMR (CDCl<sub>3</sub>, 400 MHz)**

TK-B50-13C.12.fid  
TK-B50-13C

— 153.129  
140.802  
136.050  
136.007  
133.454  
132.671  
130.471  
130.236  
128.739  
128.379  
128.344  
127.512  
125.525  
120.289  
— 115.512

77.478  
77.160  
76.843  
76.176

— 21.146

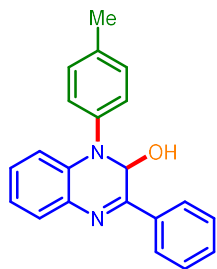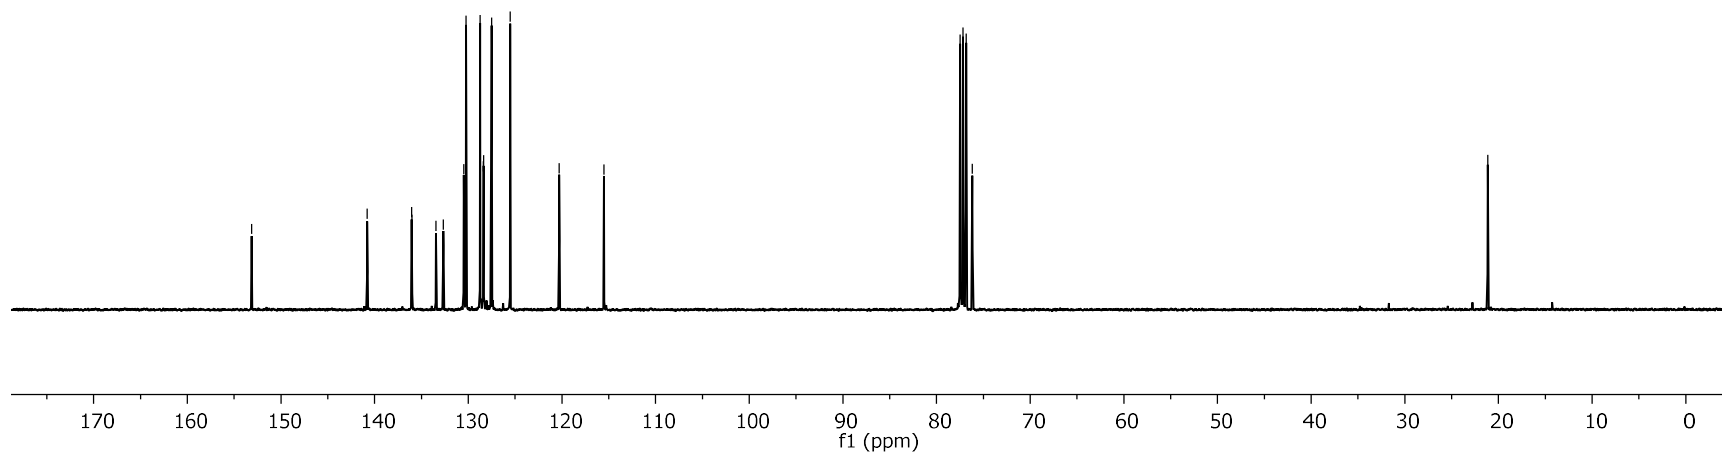

**3-Phenyl-1-(p-tolyl)-1,2-dihydroquinoxalin-2-ol (3ac):  $^{13}\text{C}\{^1\text{H}\}$  NMR ( $\text{CDCl}_3$ , 101 MHz)**

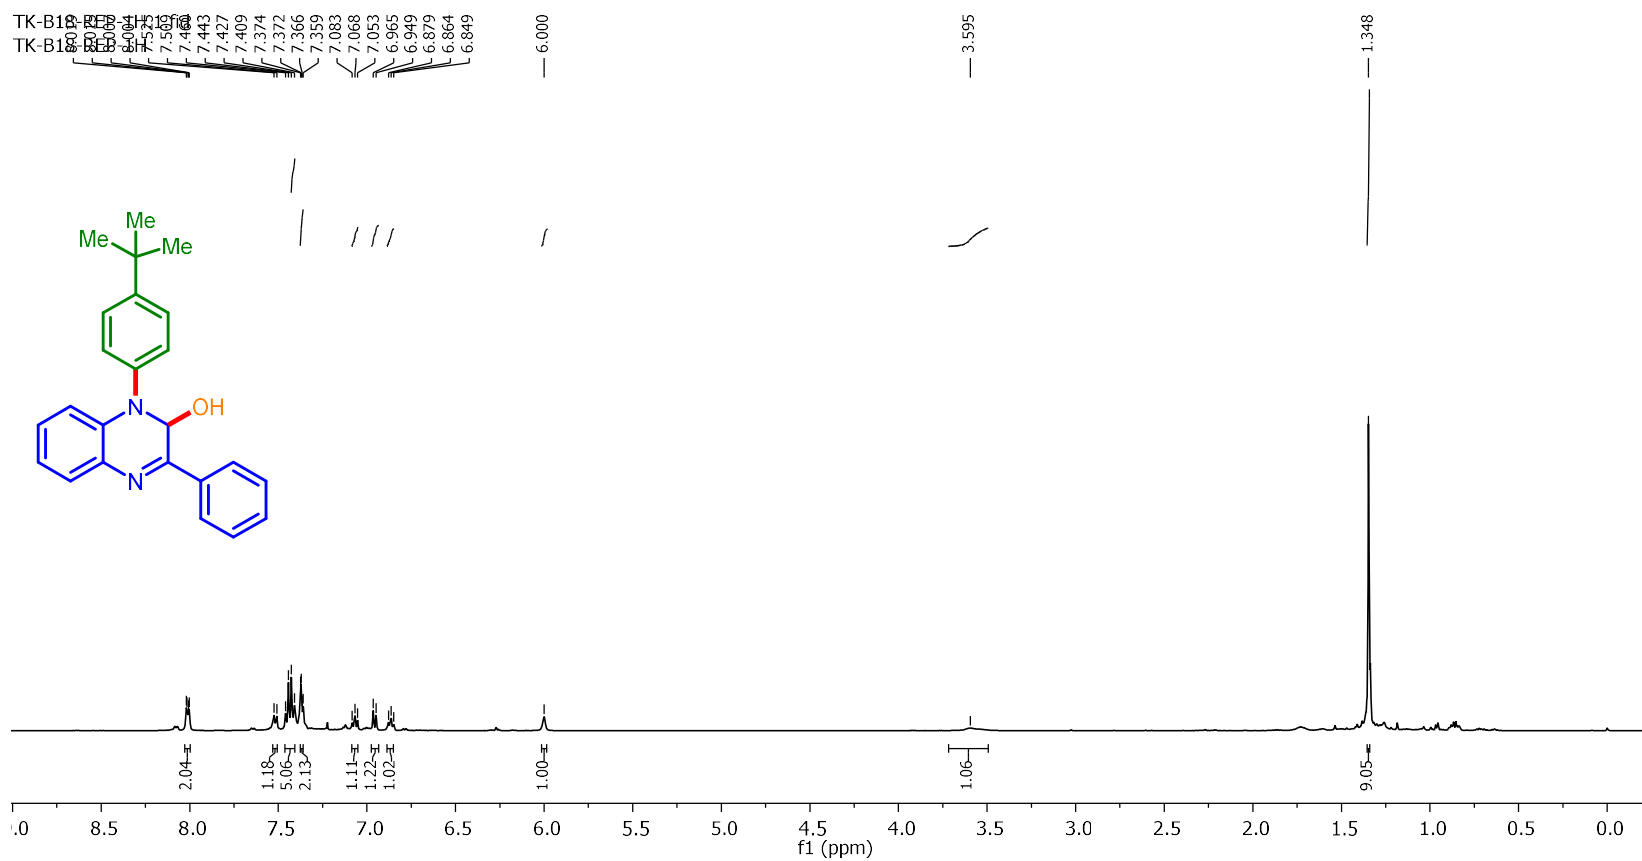

1-(4-*tert*-Butylphenyl)-3-phenyl-1,2-dihydroquinoxalin-2-ol (3ad): <sup>1</sup>H NMR (CDCl<sub>3</sub>, 500 MHz)

TKB18-REP-13C 10.0d  
TKB18-REP-13C 10.0d

155.221  
149.188  
140.724  
135.994  
133.520  
132.564  
130.472  
128.721  
128.335  
128.313  
127.530  
126.493  
124.977  
120.344  
115.664

77.478  
77.161  
76.843  
76.138

34.676  
31.519

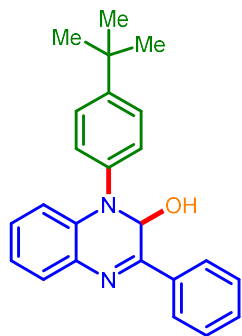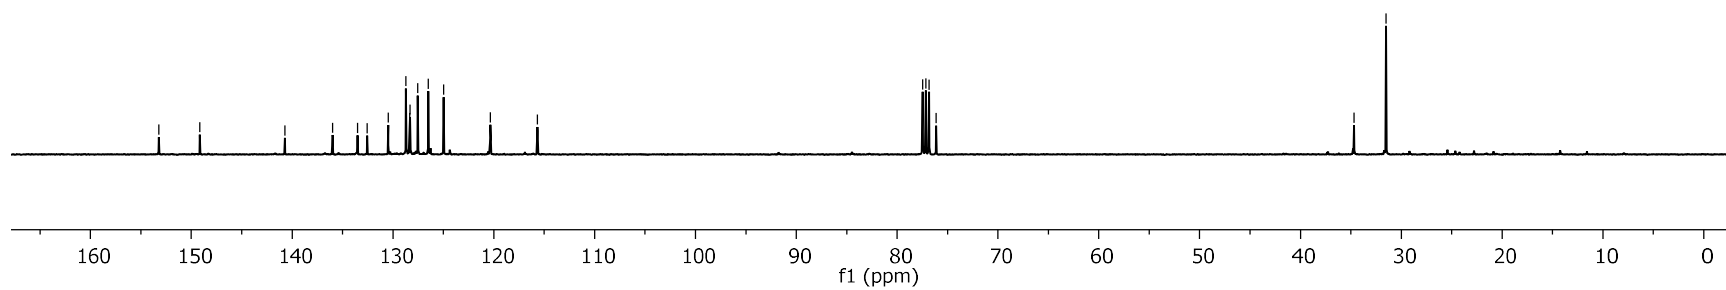

**1-(4-(*tert*-Butyl)henyl)-3-phenyl-1,2-dihydroquinoxalin-2-ol (3ad):  $^{13}\text{C}\{^1\text{H}\}$  NMR ( $\text{CDCl}_3$ , 101 MHz)**

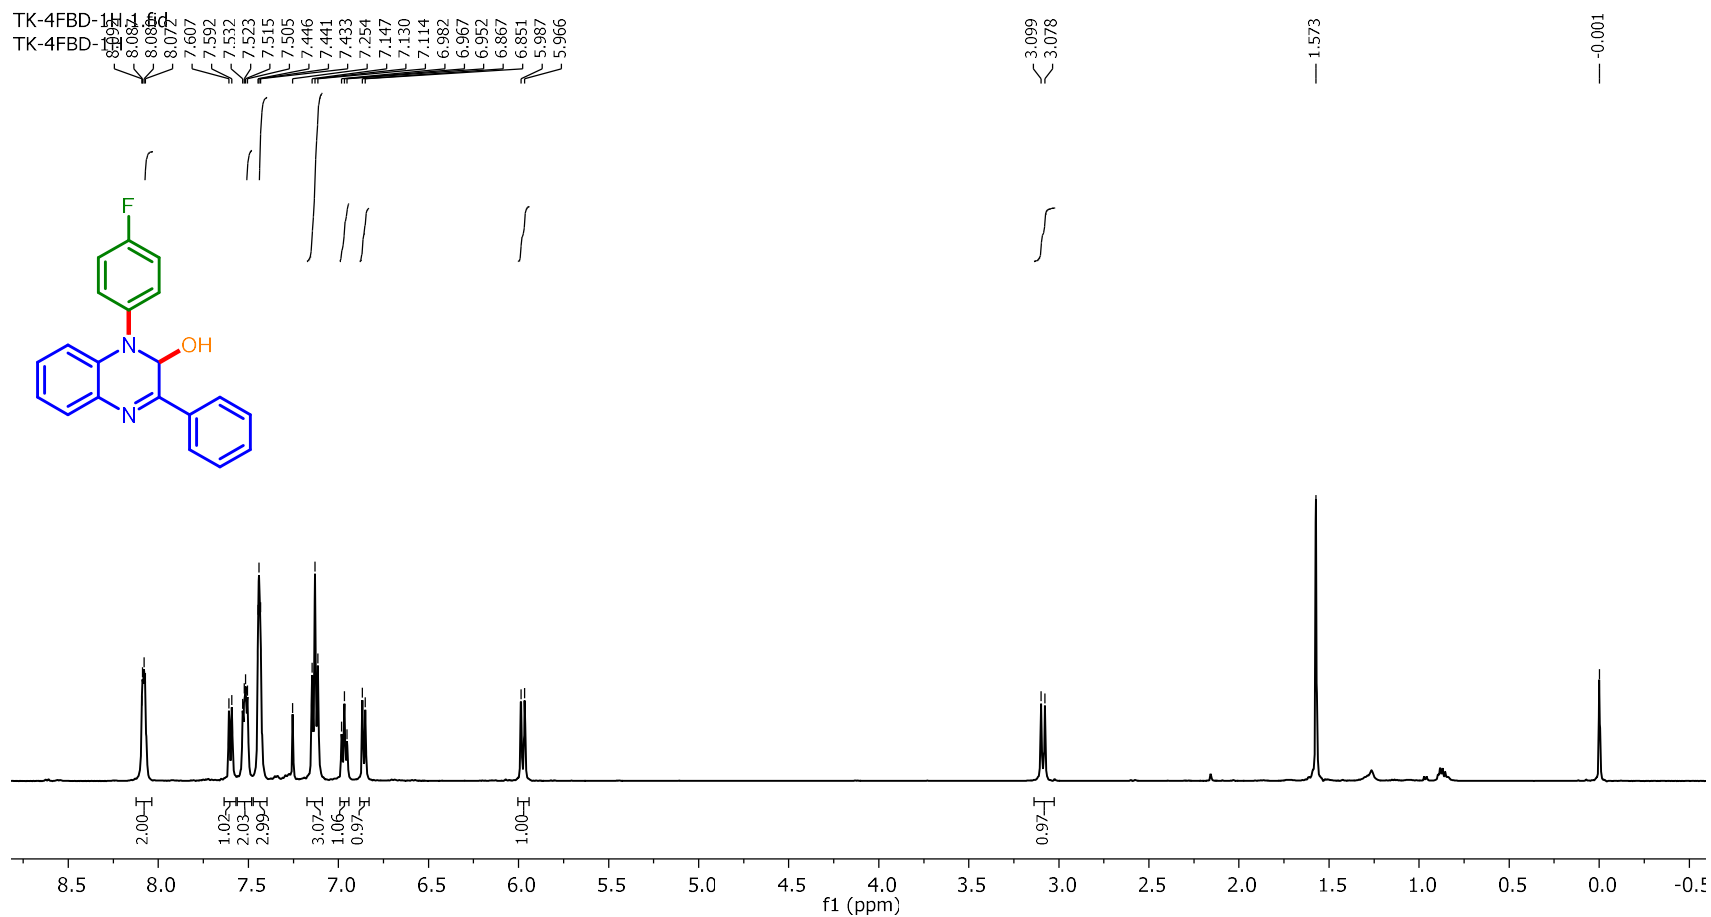

**1-(4-Fluorophenyl)-3-phenyl-1,2-dihydroquinoxalin-2-ol (3ae):  $^1\text{H}$  NMR ( $\text{CDCl}_3$ , 500 MHz)**

TK-4FBD-13C.1.fid  
TK-4FBD-13C

162.043  
160.085  
153.451  
139.377  
139.353  
136.034  
133.483  
132.738  
130.706  
128.876  
128.713  
128.597  
127.724  
127.658  
127.522  
120.674  
116.641  
116.462  
115.298

77.414  
77.161  
76.906  
76.145

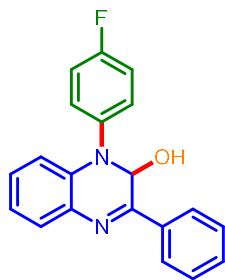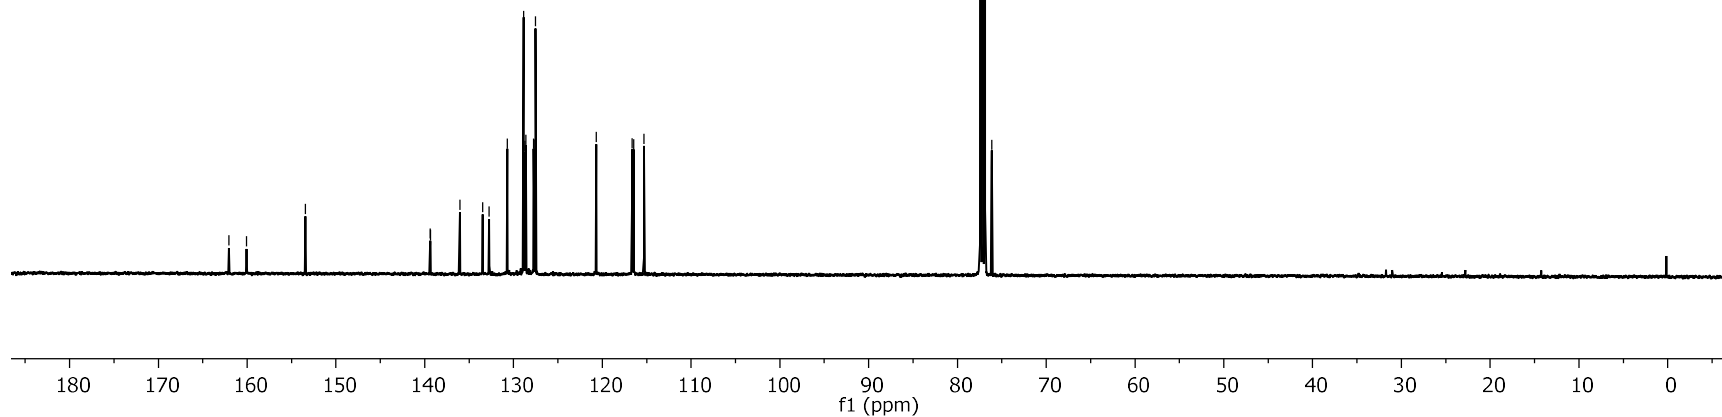

1-(4-Fluorophenyl)-3-phenyl-1,2-dihydroquinoxalin-2-ol (3ae):  $^{13}\text{C}\{^1\text{H}\}$  NMR ( $\text{CDCl}_3$ , 126 MHz)

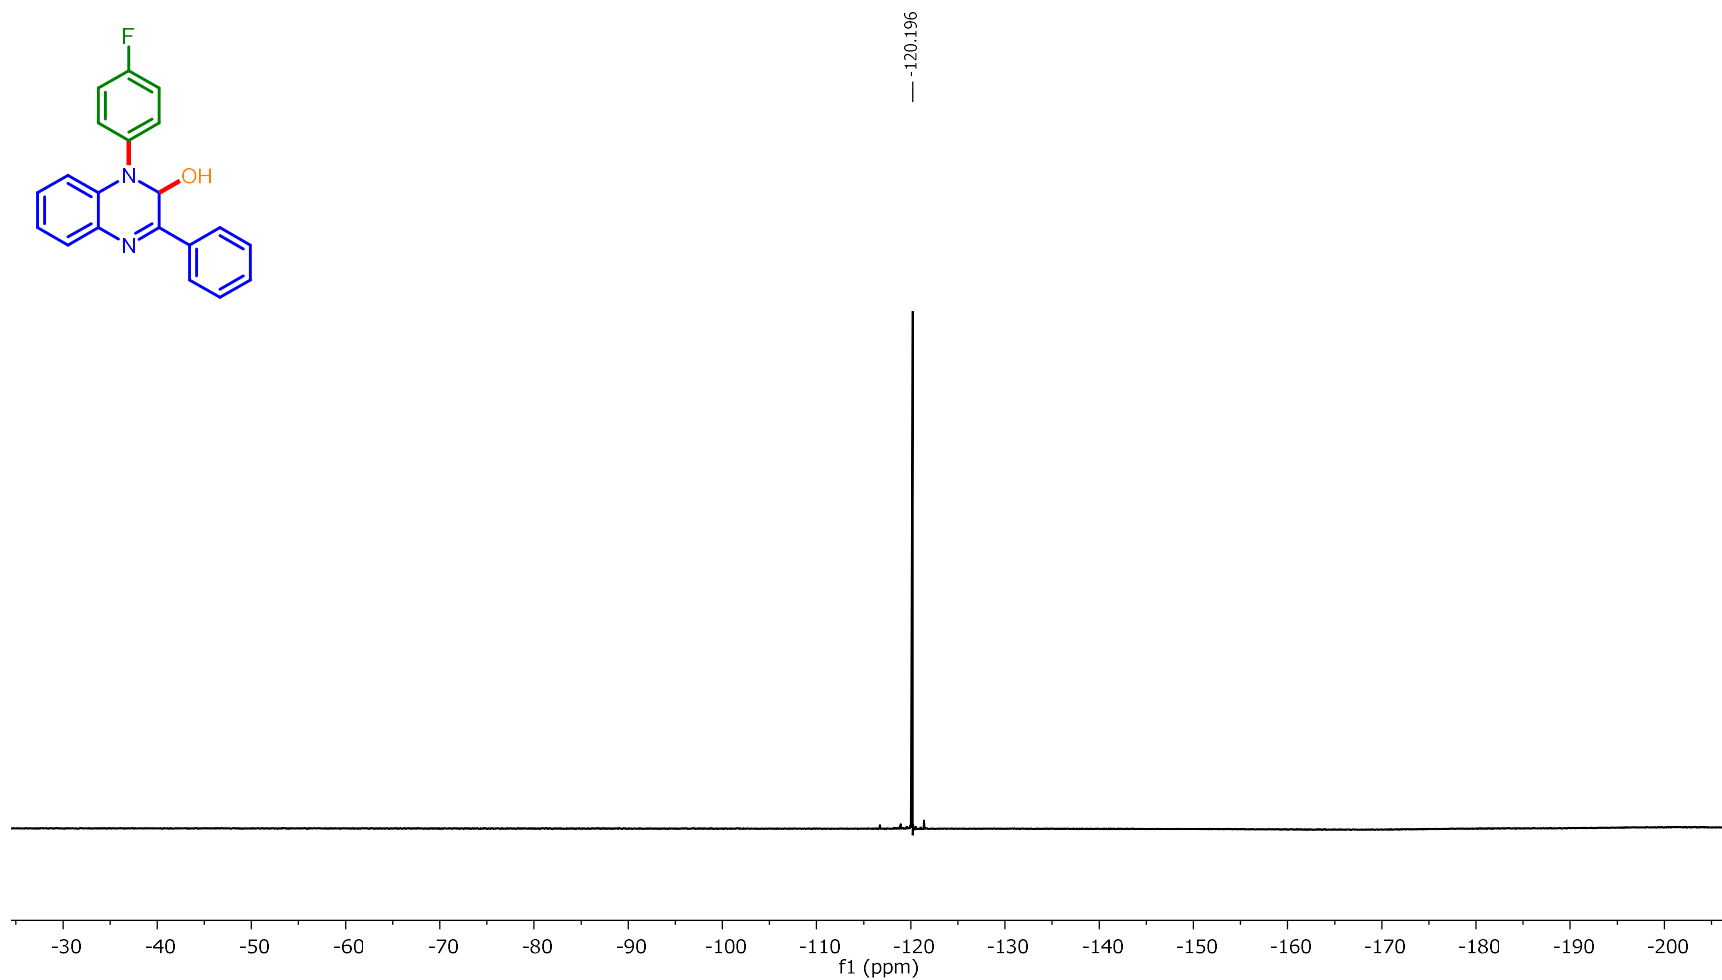

**1-(4-Fluorophenyl)-3-phenyl-1,2-dihydroquinoxalin-2-ol (3ae):  $^{19}\text{F}$  NMR ( $\text{CDCl}_3$ , 471 MHz)**

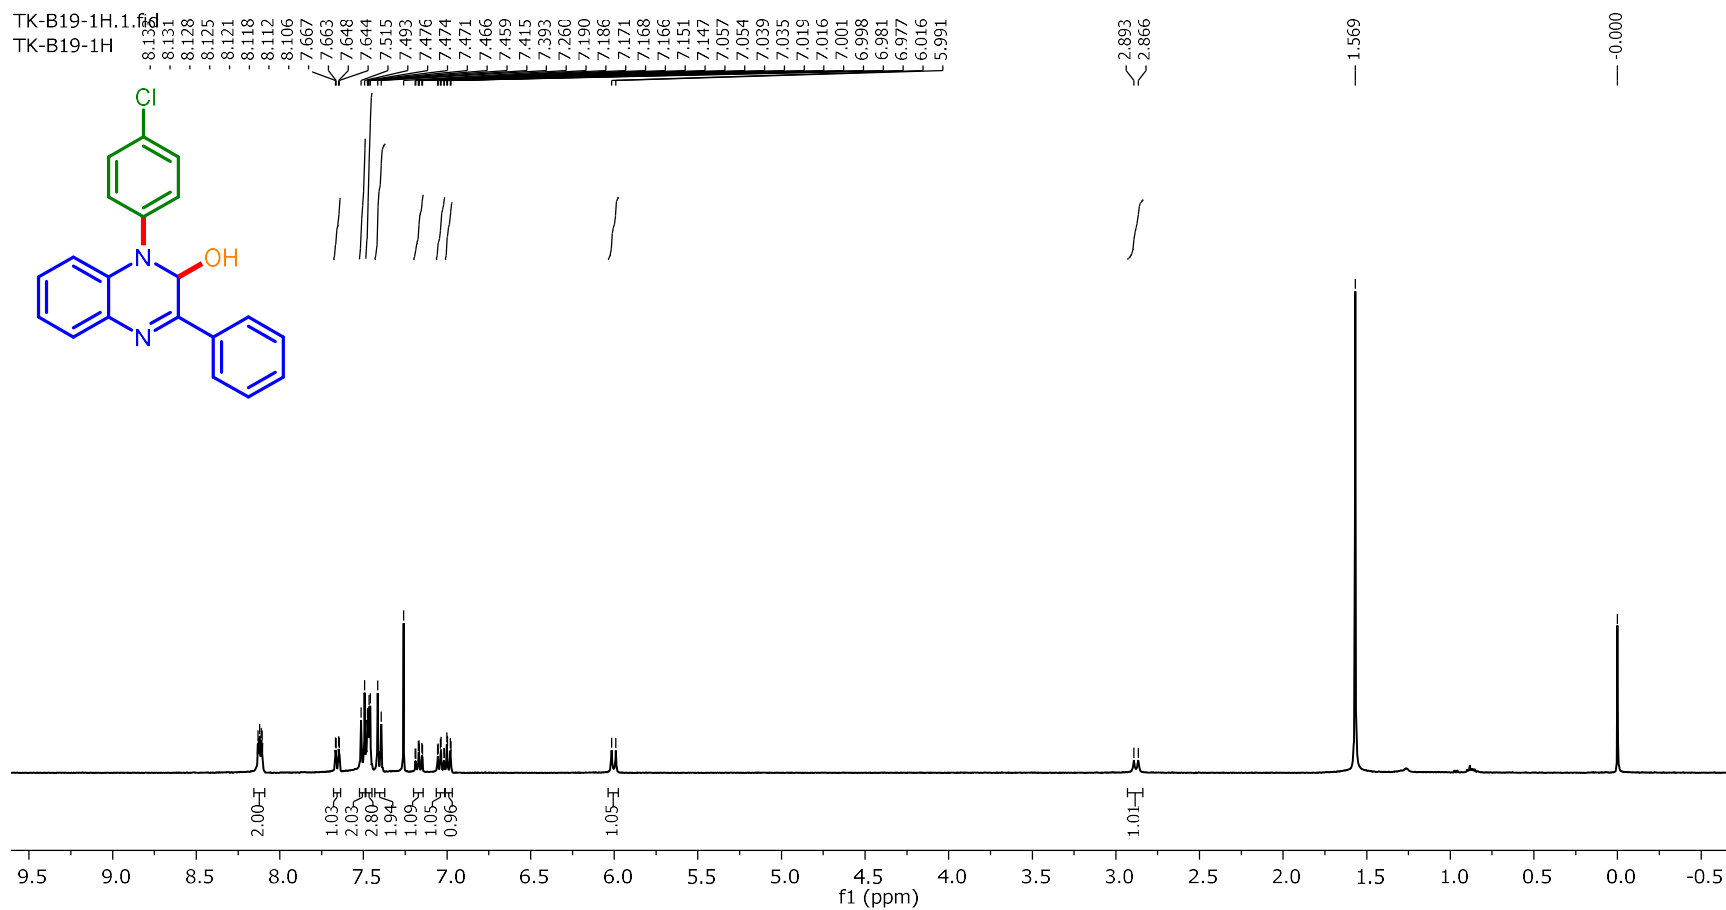

**1-(4-Chlorophenyl)-3-phenyl-1,2-dihydroquinoxalin-2-ol (3af):  $^1\text{H}$  NMR ( $\text{CDCl}_3$ , 500 MHz)**



TK-4CL-2-13C.9.fid  
TK-4CL-2-13C

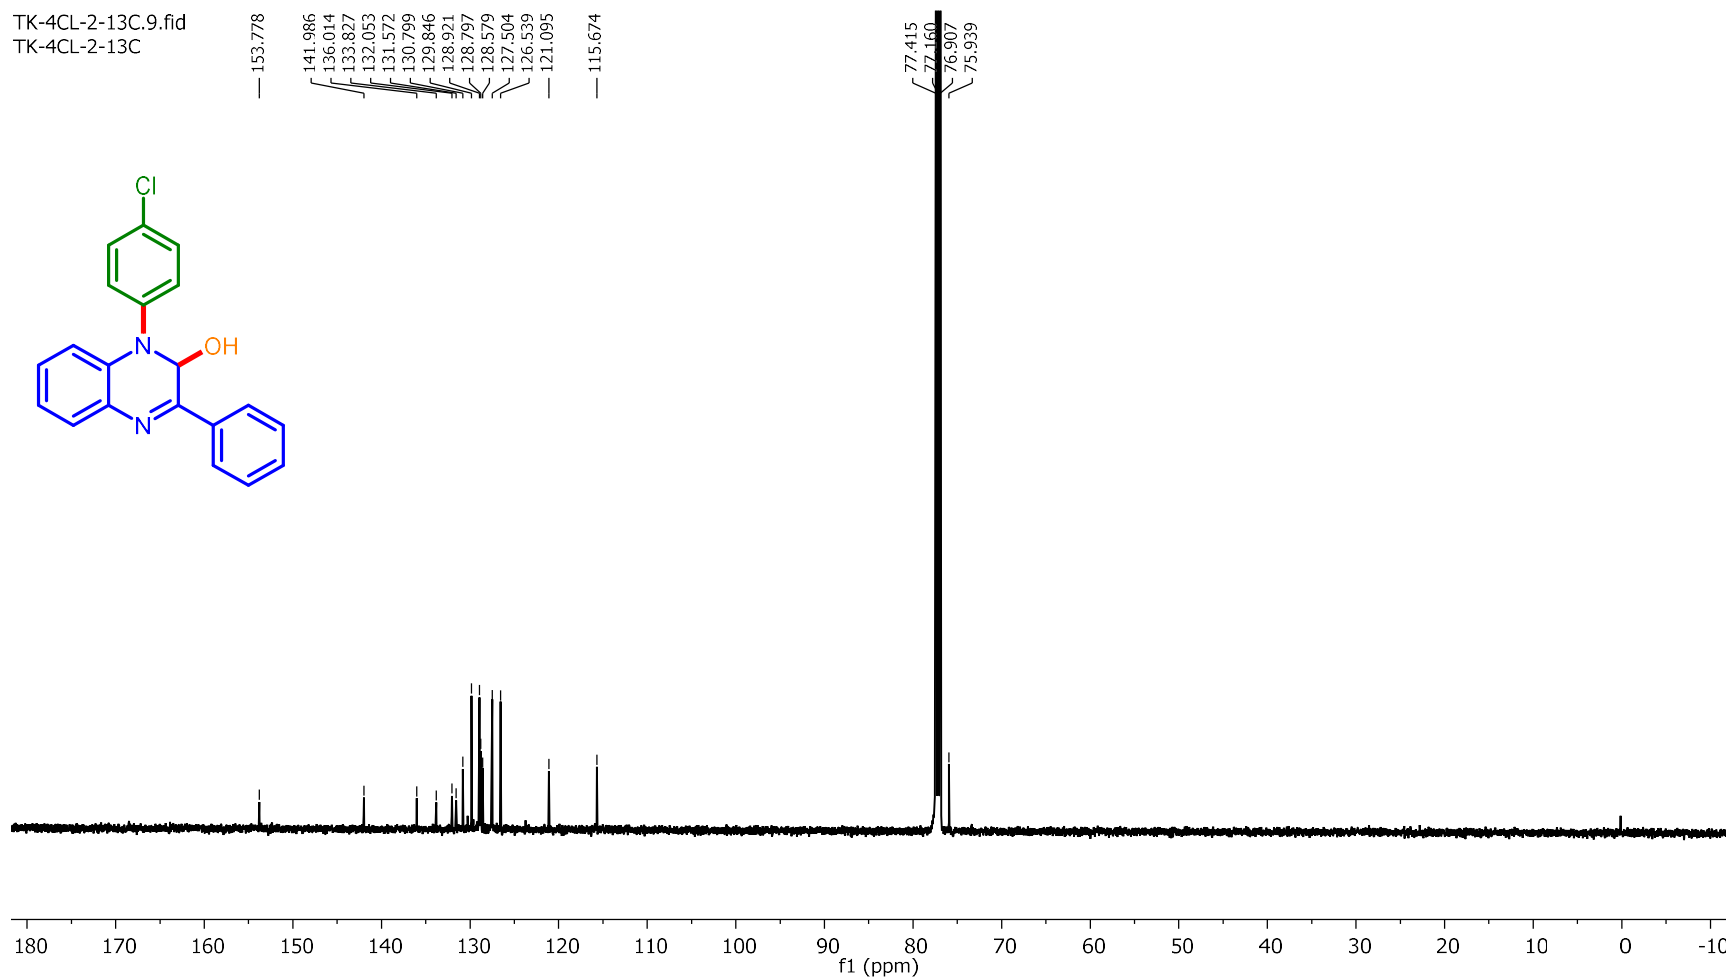

1-(4-Chlorophenyl)-3-phenyl-1,2-dihydroquinoxalin-2-ol (3af):  $^{13}\text{C}\{^1\text{H}\}$  NMR (CDCl<sub>3</sub>, 126 MHz)

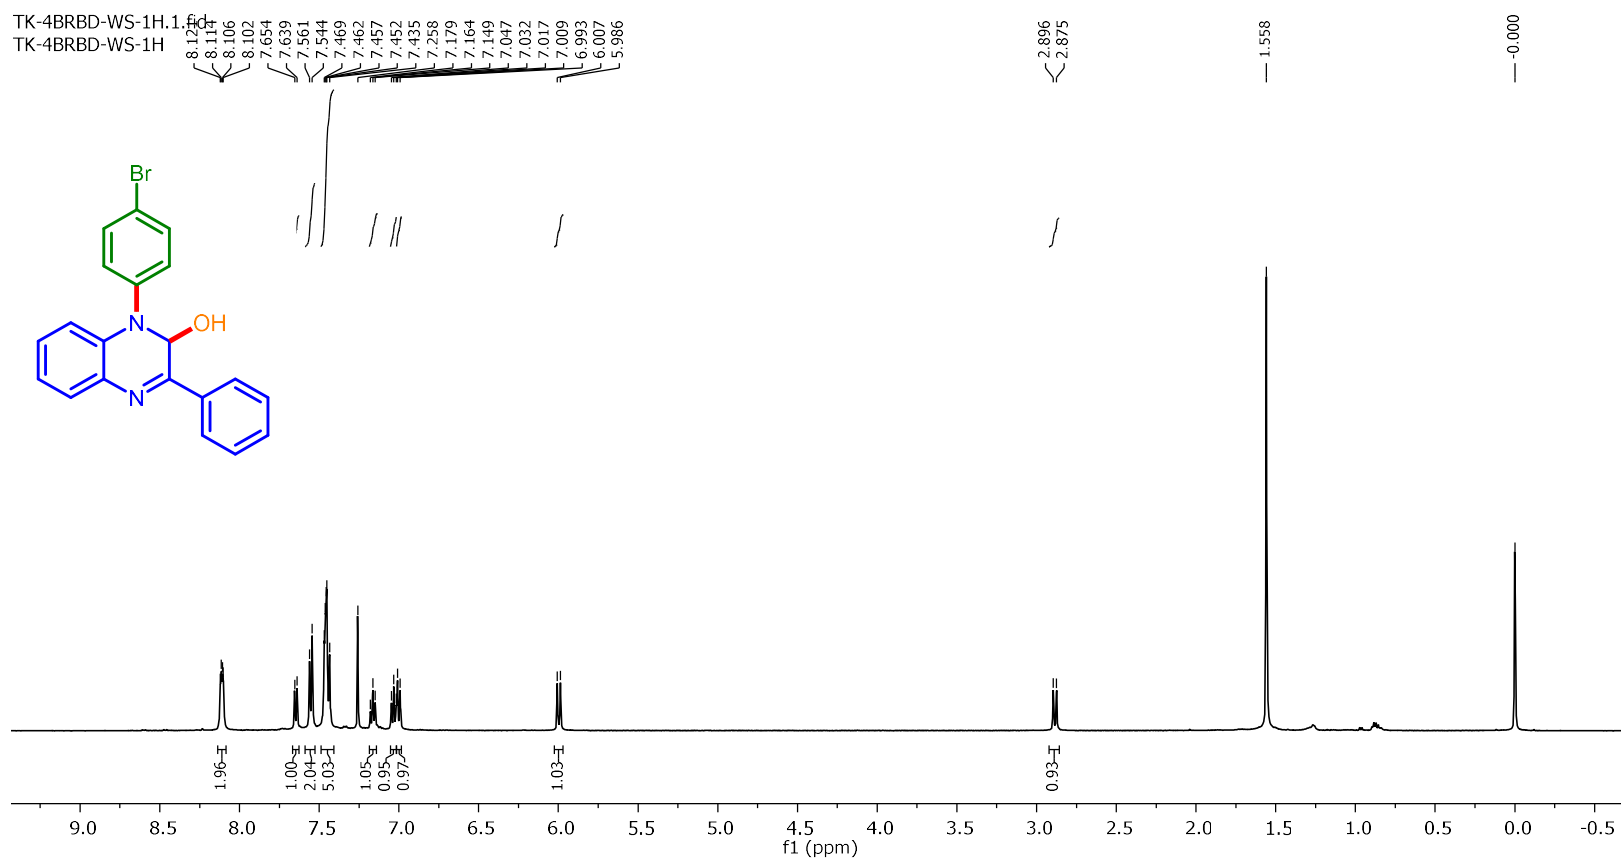

1-(4-Bromophenyl)-3-phenyl-1,2-dihydroquinoxalin-2-ol (3ag):  $^1\text{H}$  NMR ( $\text{CDCl}_3$ , 500 MHz)

TK-4BRBDREP-13C.3.fid  
TK-4BRBDREP-13C

153.804  
142.504  
135.992  
133.871  
132.821  
131.896  
130.823  
128.932  
128.826  
128.592  
127.496  
126.783  
121.185  
119.291  
115.729

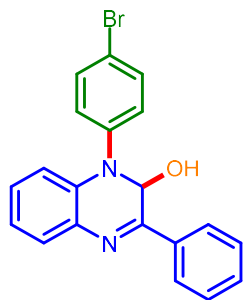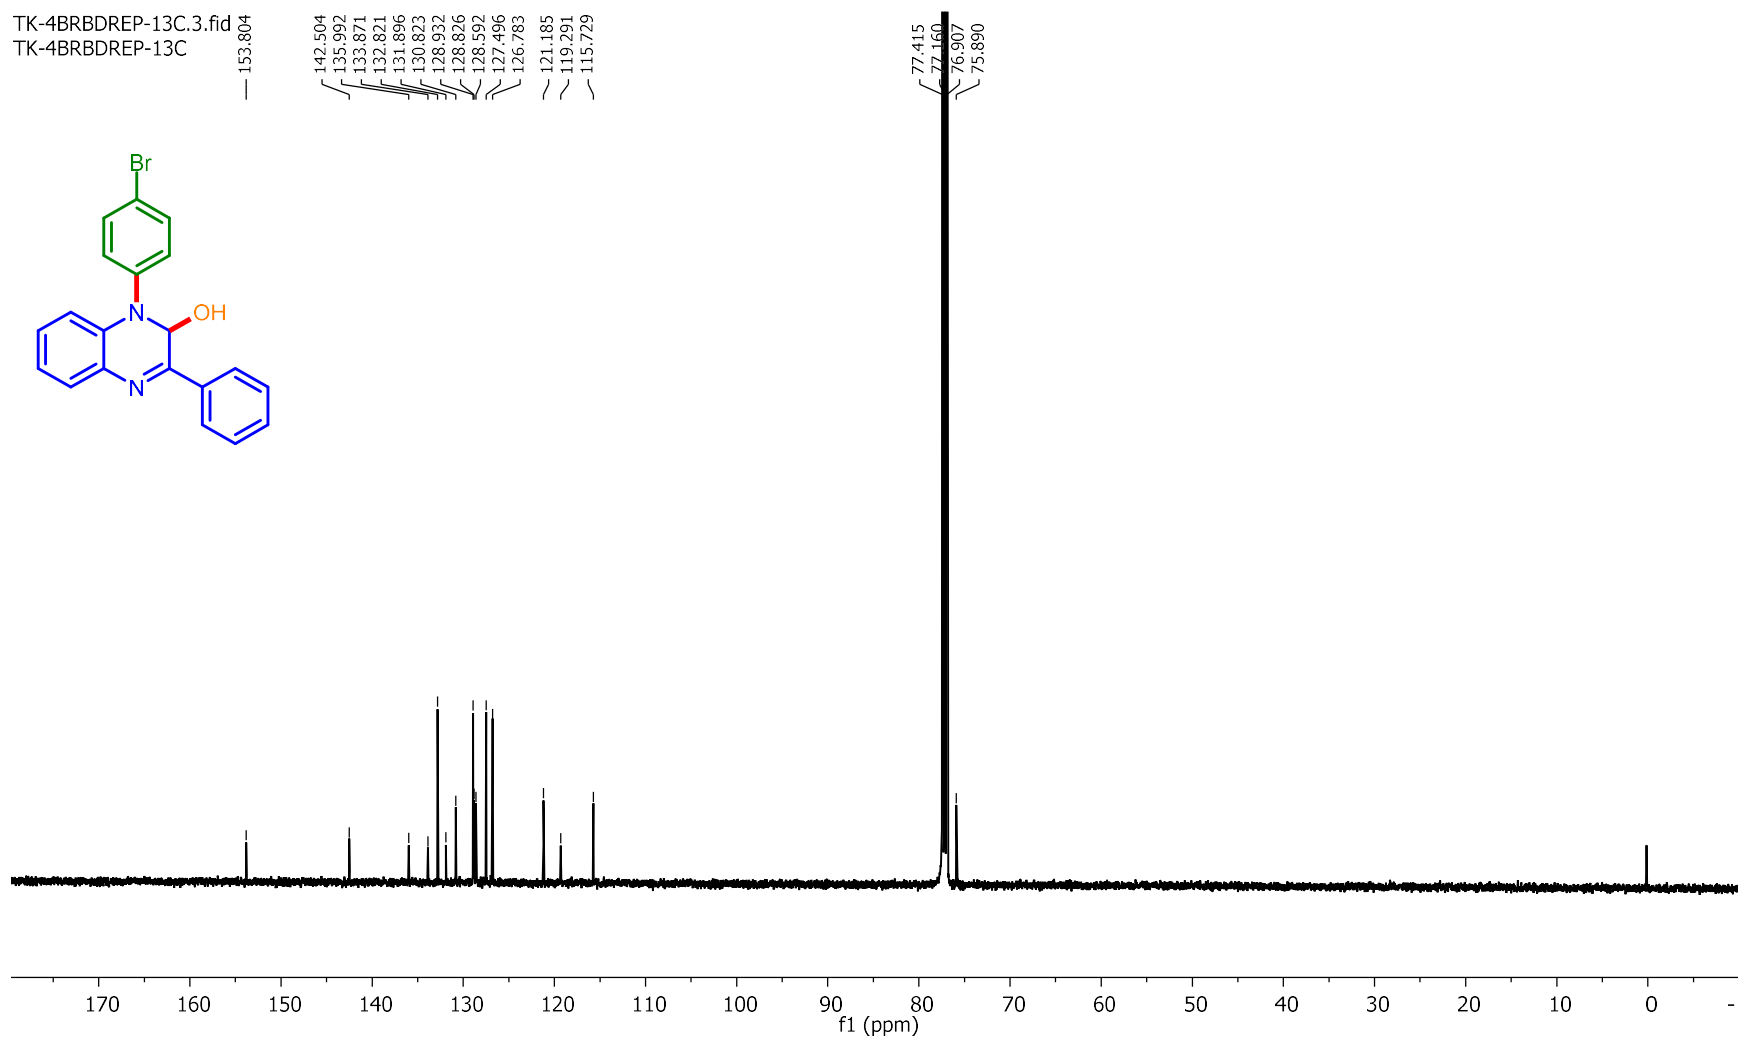

1-(4-Bromophenyl)-3-phenyl-1,2-dihydroquinoxalin-2-ol (3ag):  $^{13}\text{C}\{^1\text{H}\}$  NMR ( $\text{CDCl}_3$ , 126 MHz)

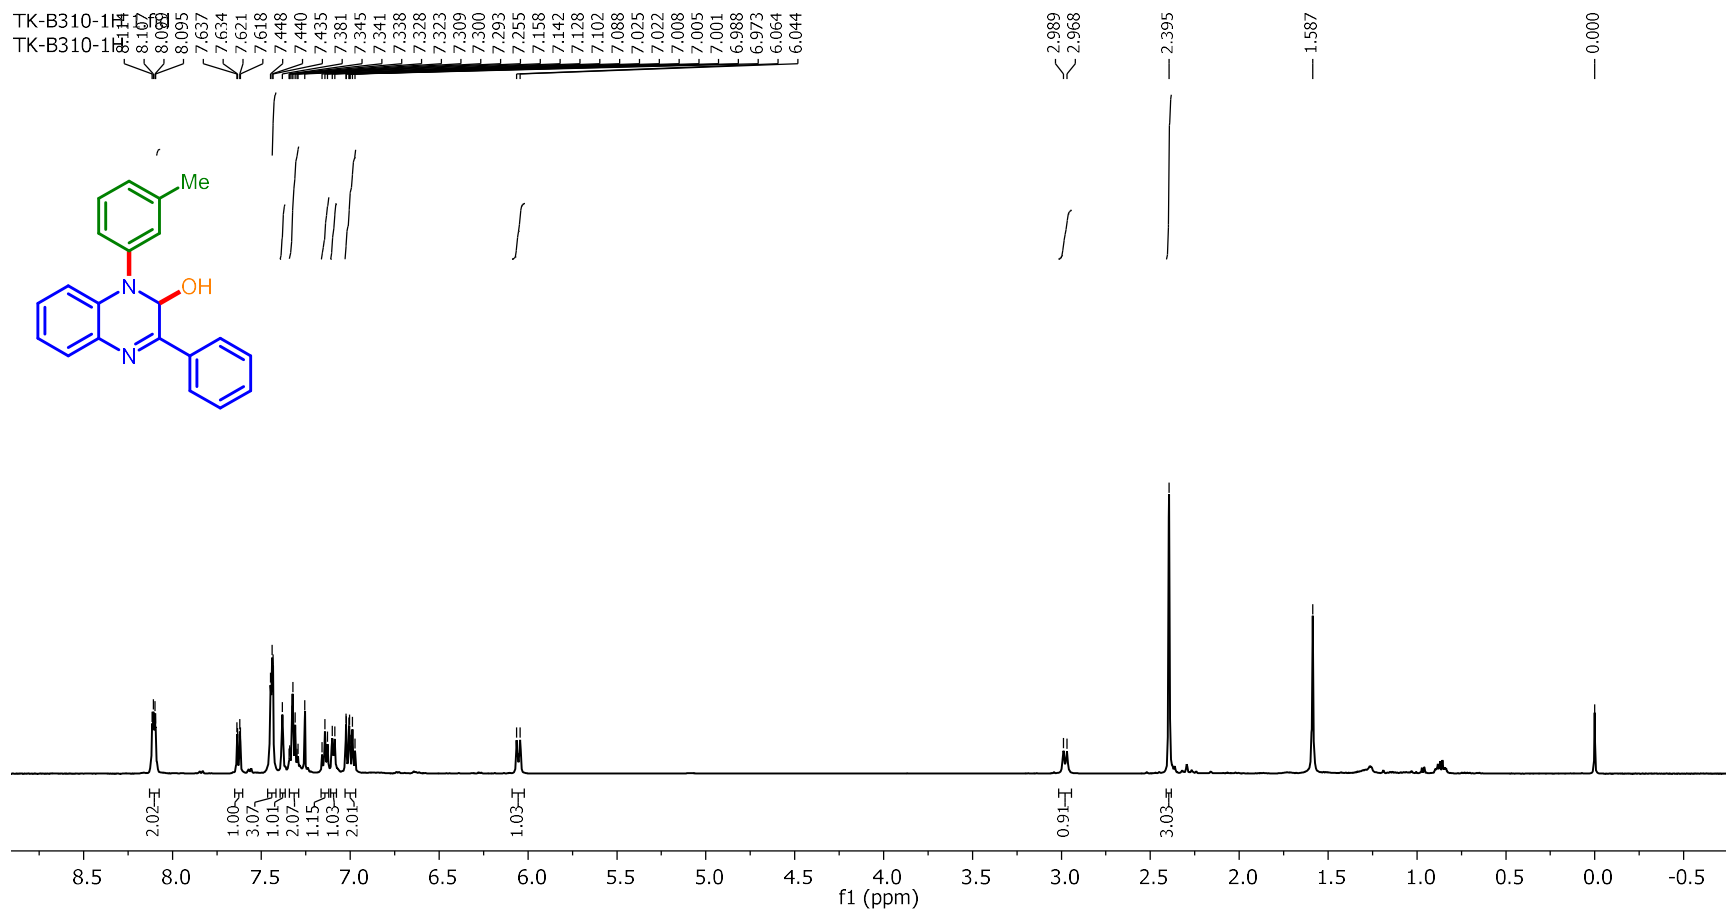

**3-Phenyl-1-(m-tolyl)-1,2-dihydroquinoxalin-2-ol (3ah):  $^1\text{H}$  NMR ( $\text{CDCl}_3$ , 500 MHz)**

TK-B310-13C.1.fid  
TK-B310-13C

153.507  
143.382  
139.787  
136.155  
133.745  
132.481  
130.612  
129.453  
128.843  
128.619  
128.402  
127.523  
126.976  
125.862  
122.380  
120.590  
115.989

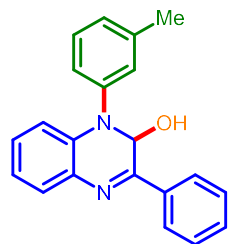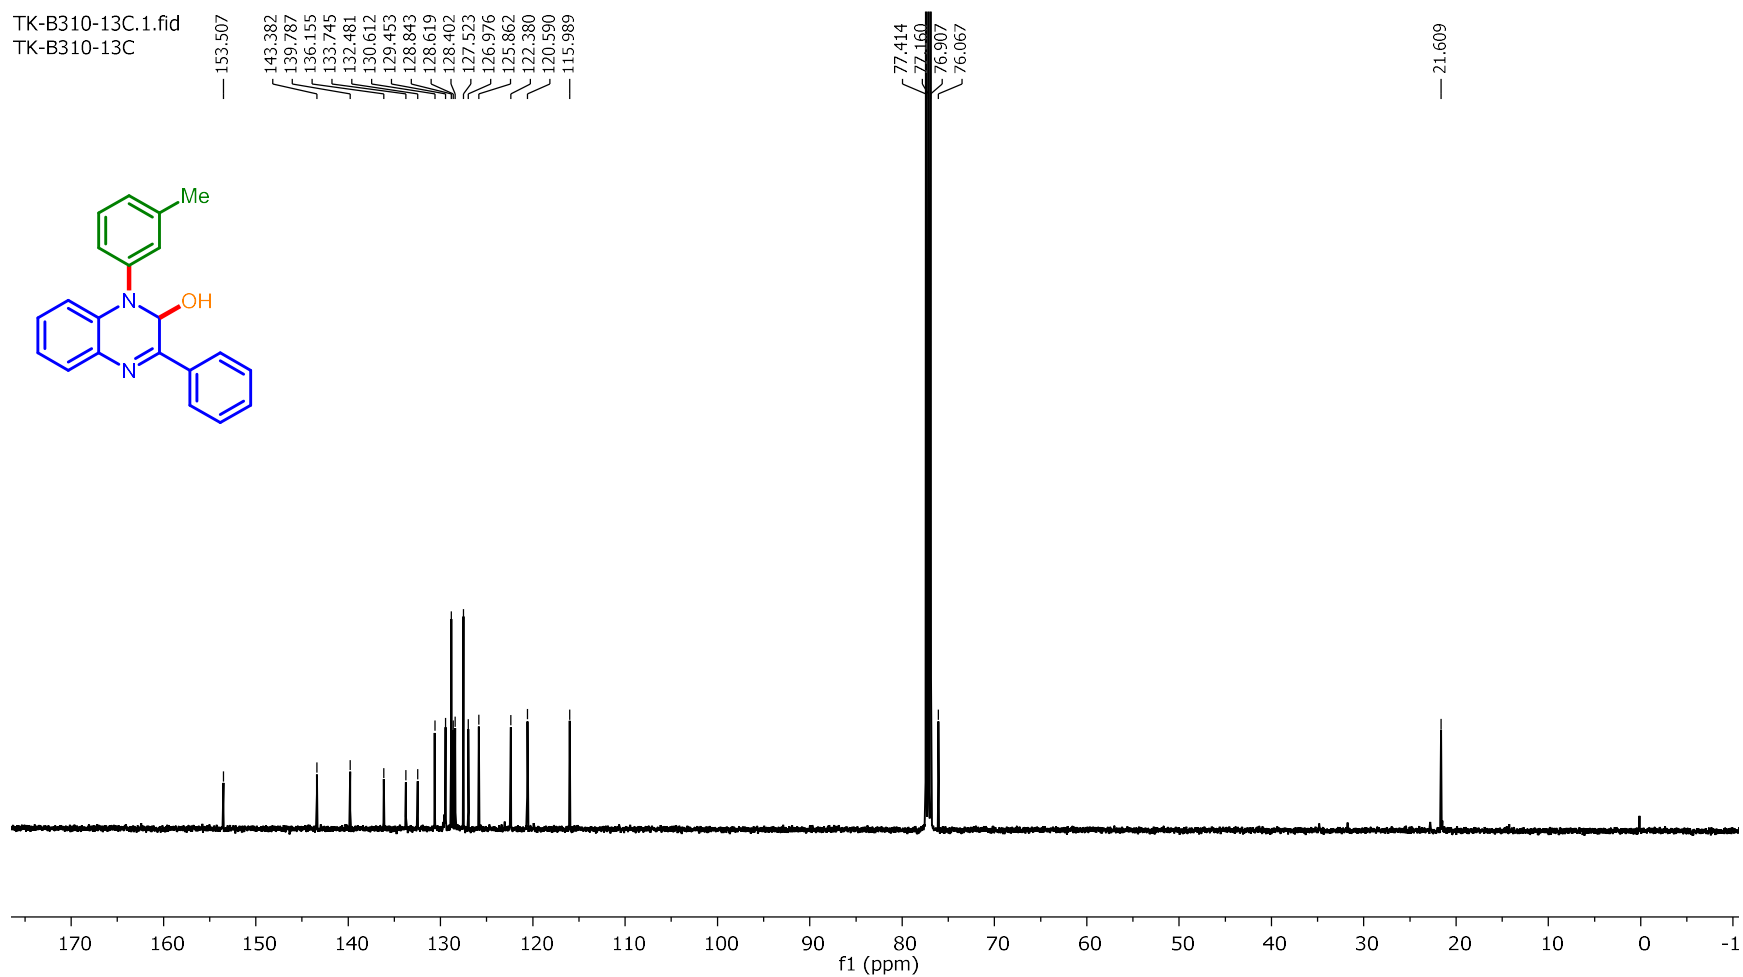

**3-Phenyl-1-(m-tolyl)-1,2-dihydroquinoxalin-2-ol (3ah):  $^{13}\text{C}\{^1\text{H}\}$  NMR ( $\text{CDCl}_3$ , 126 MHz)**

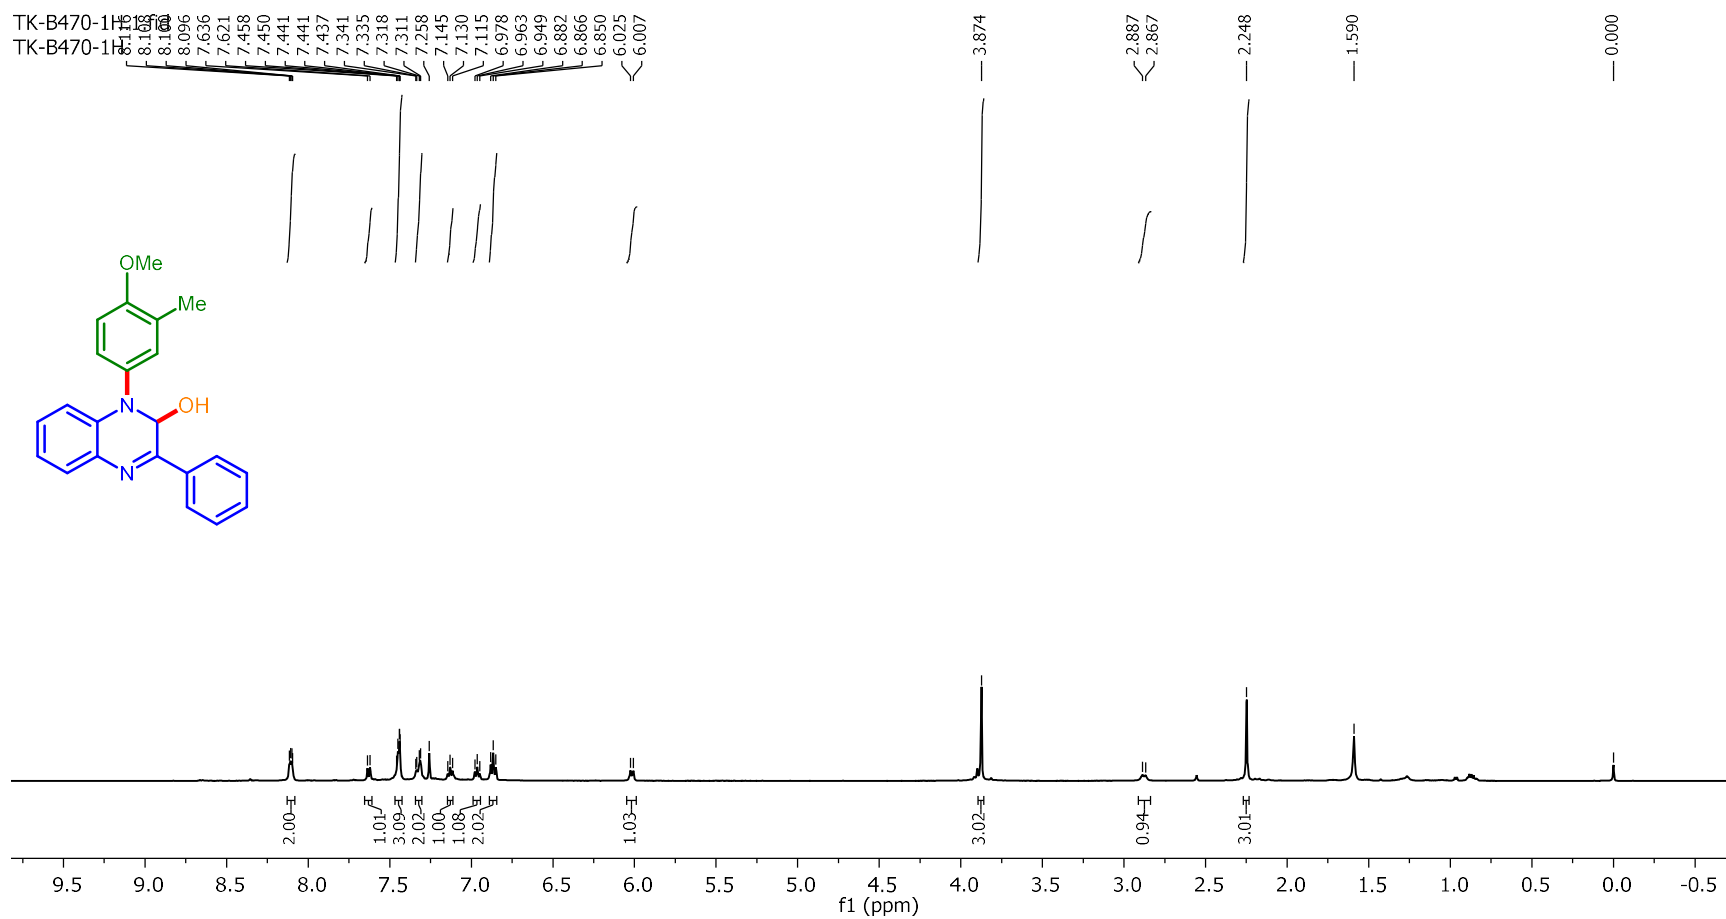

**1-(4-Methoxy-3-methylphenyl)-3-phenyl-1,2-dihydroquinoxalin-2-ol (3ai): <sup>1</sup>H NMR (CDCl<sub>3</sub>, 500 MHz)**

TK-B470-13C.10.fid  
TK-B470-13C

— 156.503  
— 152.991

136.232  
135.676  
133.437  
133.178  
130.527  
128.826  
128.637  
128.475  
128.130  
127.504  
124.753  
119.984  
— 115.438  
— 110.660

77.478  
77.160  
76.843  
76.371

— 55.737

— 16.475

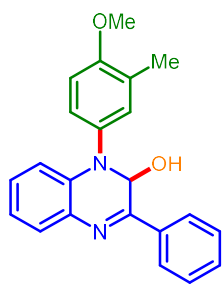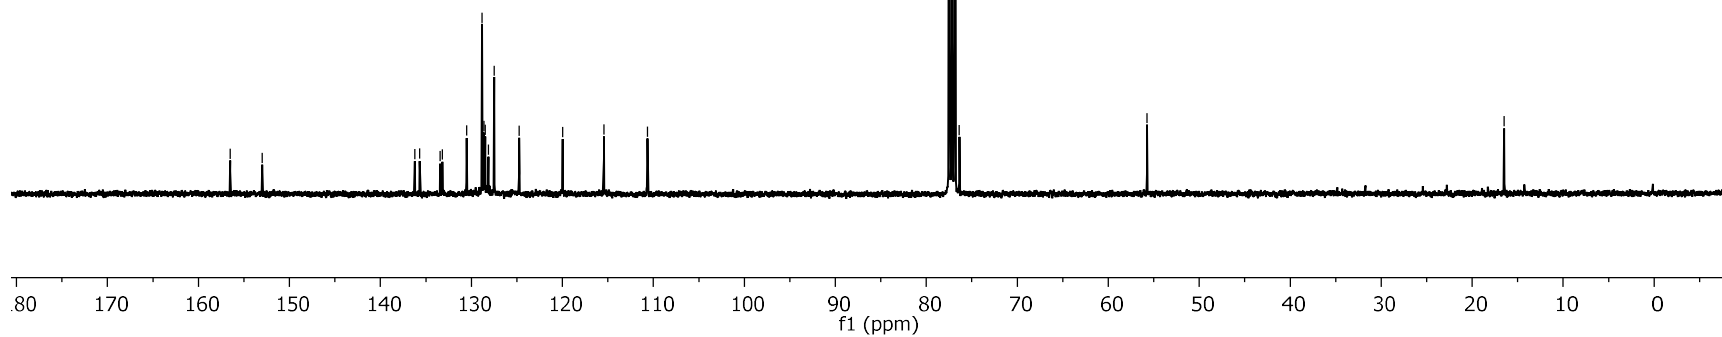

1-(4-Methoxy-3-methylphenyl)-3-phenyl-1,2-dihydroquinoxalin-2-ol (3ai):  $^{13}\text{C}\{^1\text{H}\}$  NMR ( $\text{CDCl}_3$ , 101 MHz)

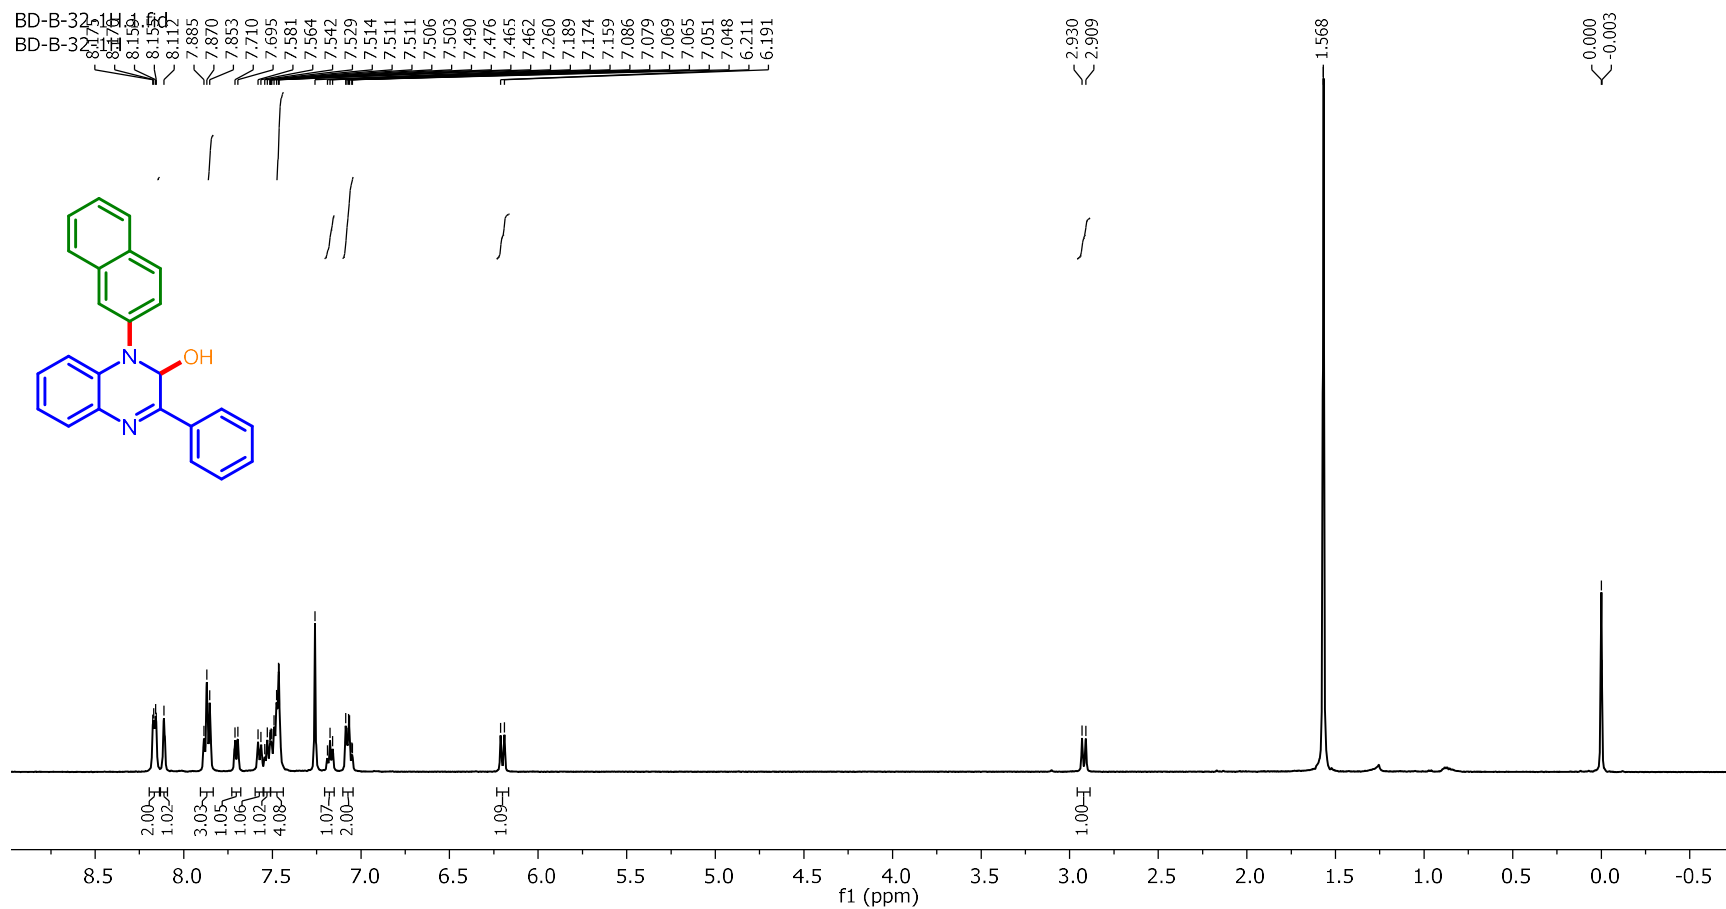

1-(Naphthalen-2-yl)-3-phenyl-1,2-dihydroquinoxalin-2-ol (3aj): <sup>1</sup>H NMR (CDCl<sub>3</sub>, 500 MHz)



BD-B-32-13C.3.fid  
BD-B-32-13C

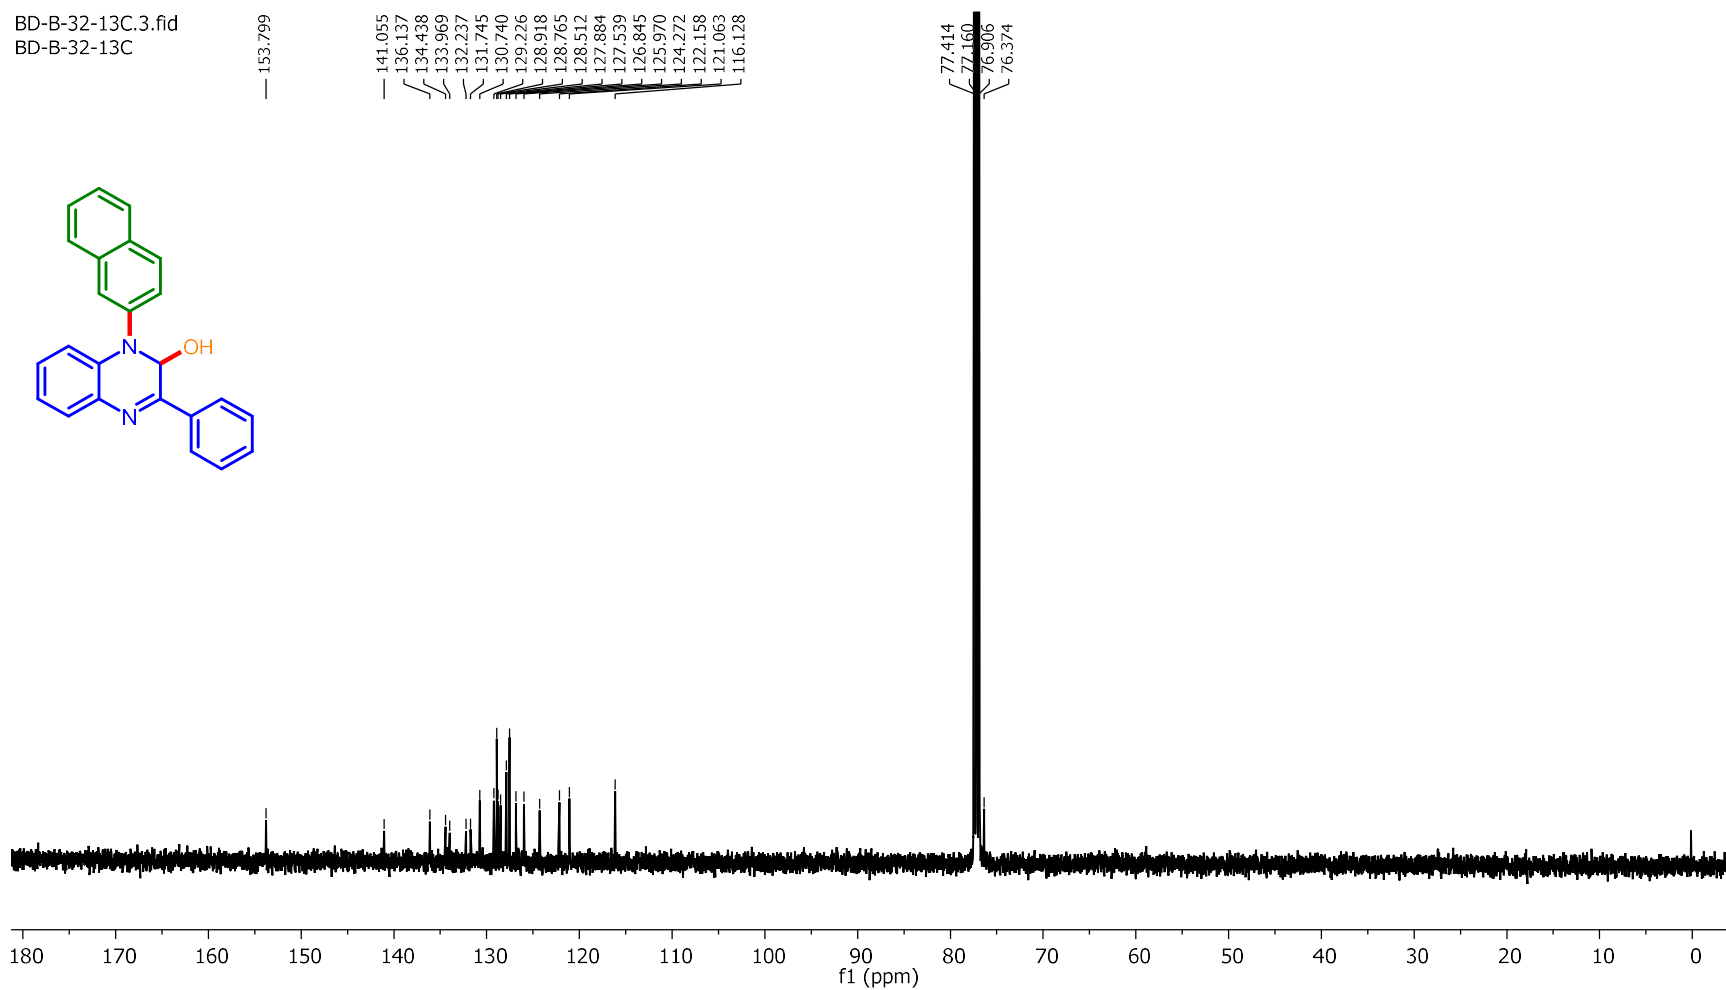

*1-(Naphthalen-2-yl)-3-phenyl-1,2-dihydroquinoxalin-2-ol (3aj):*  $^{13}\text{C}\{^1\text{H}\}$  NMR ( $\text{CDCl}_3$ , 126 MHz)

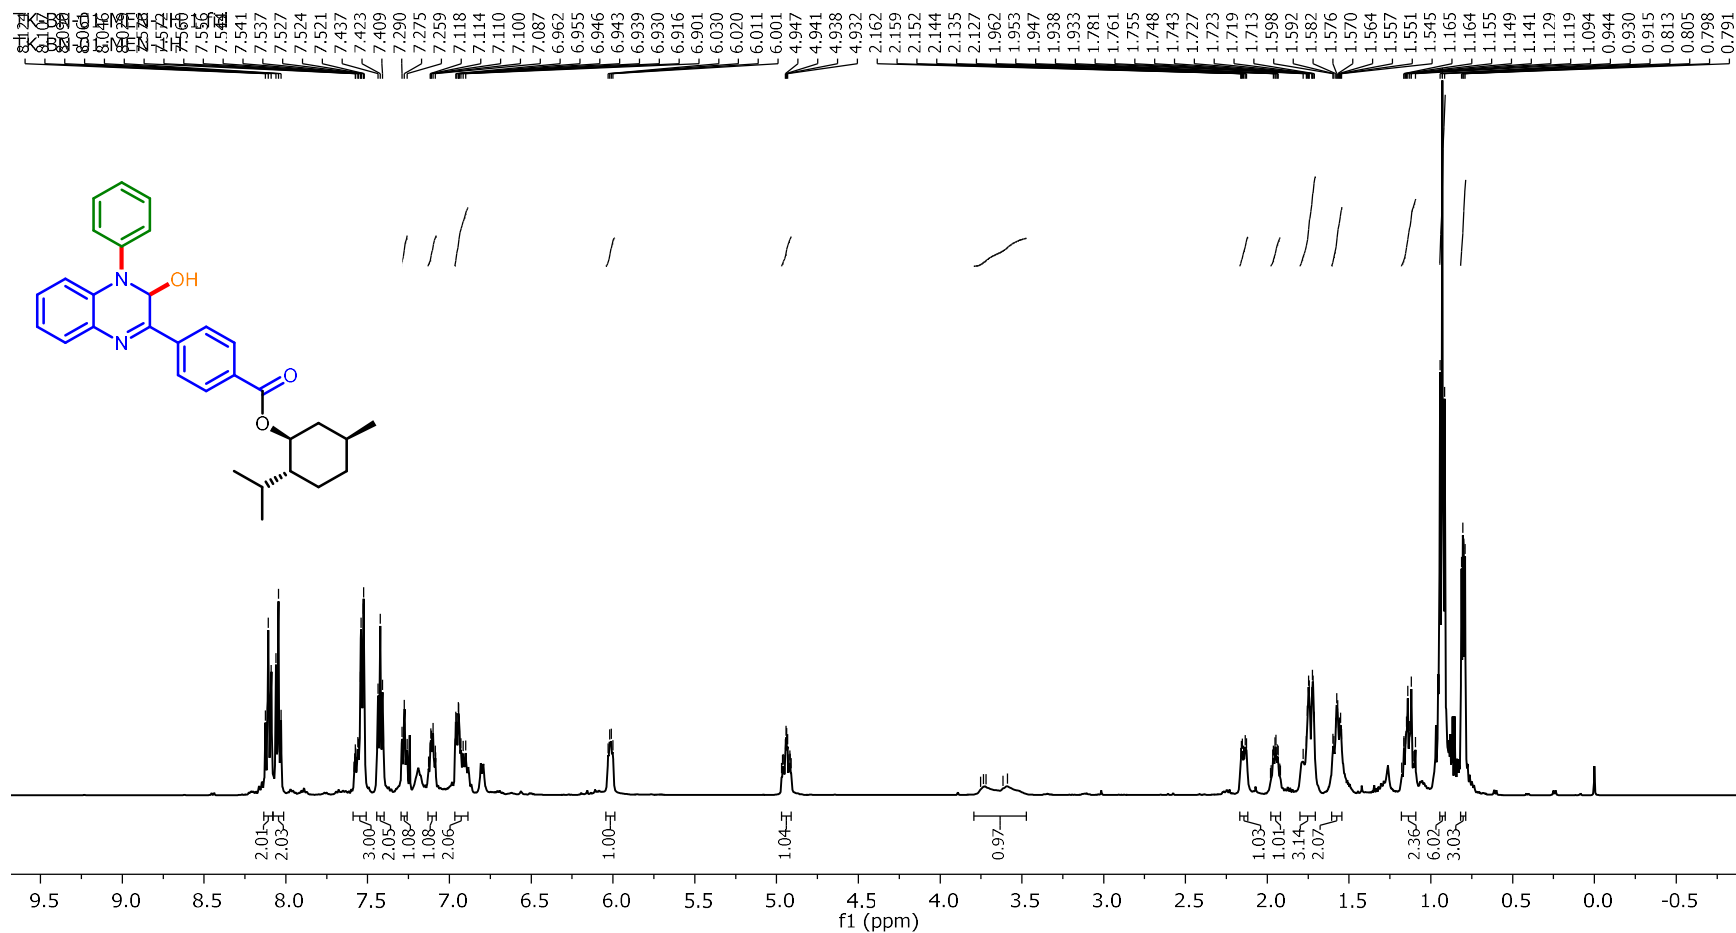

(1*S*, 2*R*, 5*S*)-2-Isopropyl-5-methylcyclohexyl 4-((*S*)-3-hydroxy-4-phenyl-3,4-dihydroquinoxalin-2-yl)benzoate (30a):

<sup>1</sup>H NMR (CDCl<sub>3</sub>, 500 MHz)

TK-BN-01-MEN-133.fid  
TK-BN-01-MEN-133

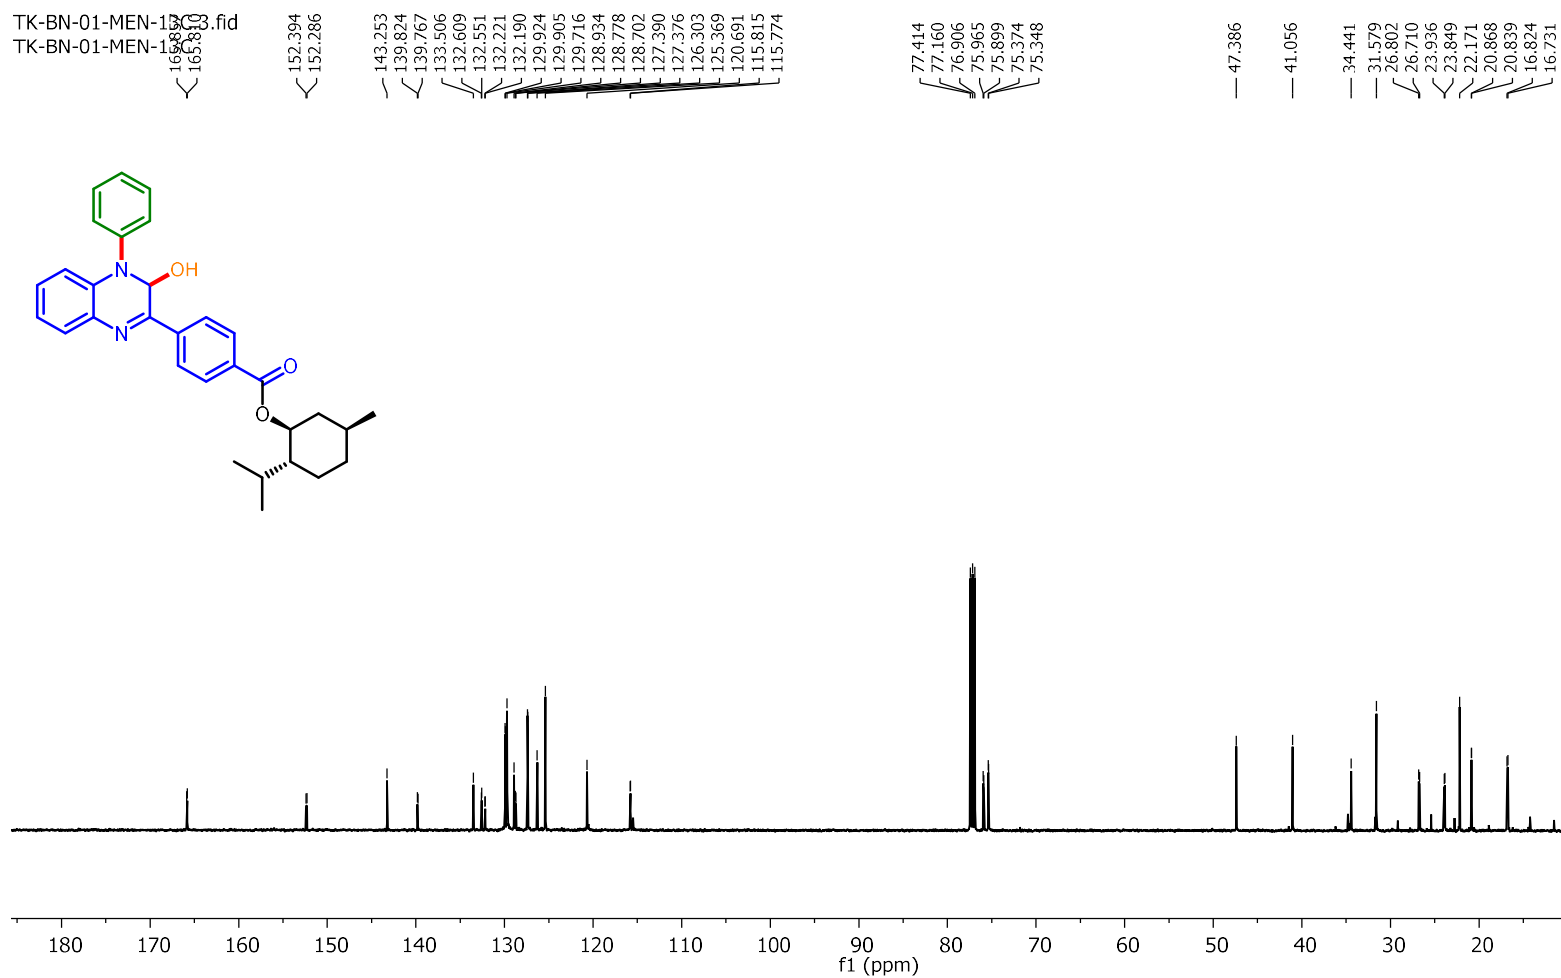

**(1S, 2R, 5S)-2-Isopropyl-5-methylcyclohexyl 4-((S)-3-hydroxy-4-phenyl-3,4-dihydroquinoxalin-2-yl)benzoate (30a):**

**$^{13}\text{C}\{^1\text{H}\}$  NMR (CDCl<sub>3</sub>, 126 MHz)**

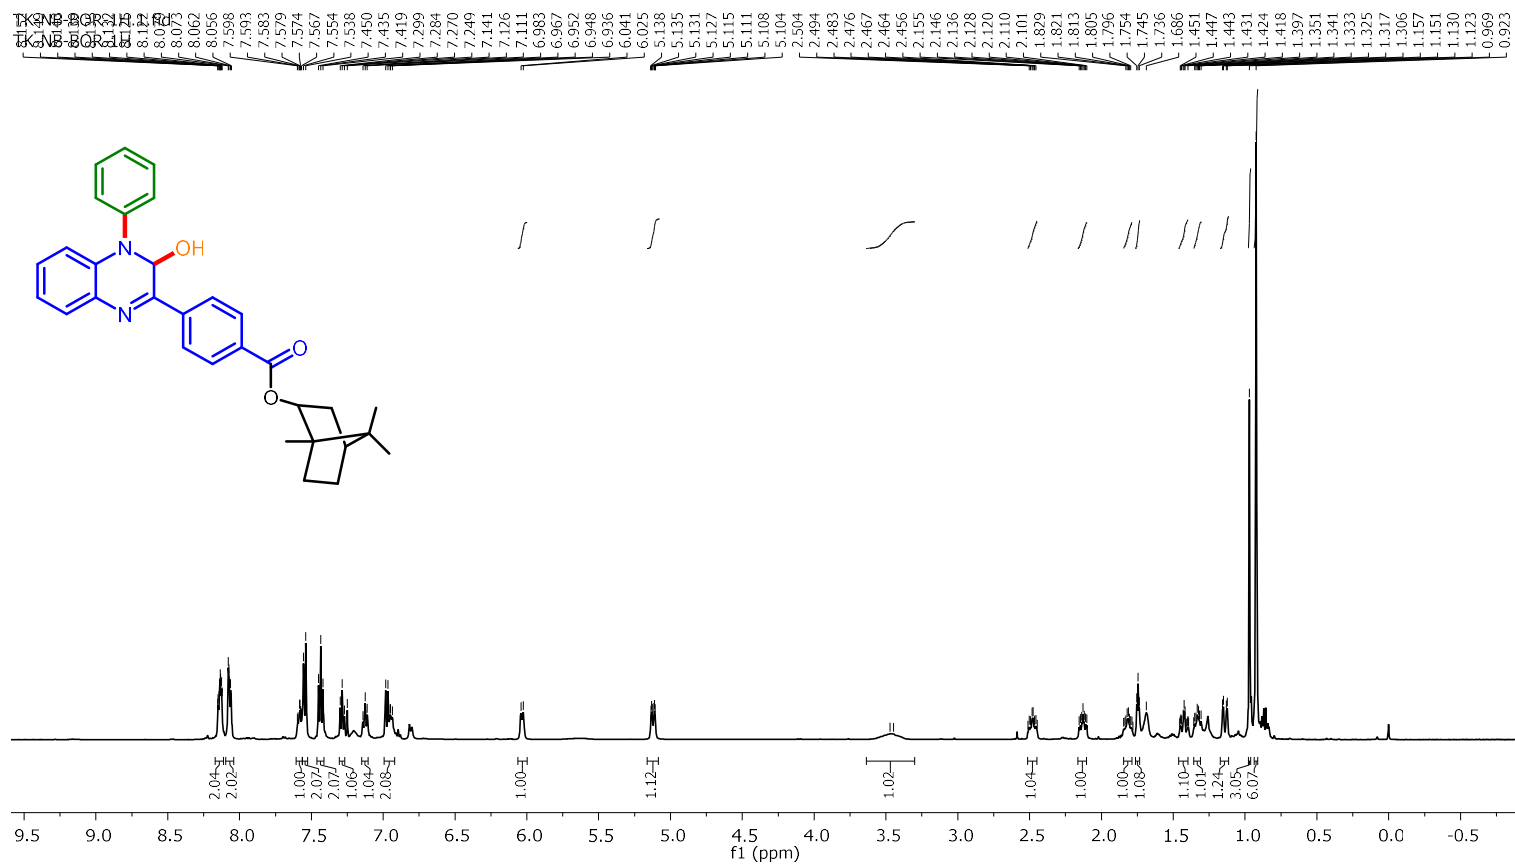

**(4R)-1,7,7-Trimethylbicyclo[2.2.1]heptan-2-yl 4-((S)-3-hydroxy-4-phenyl-3,4-dihydroquinoxalin-2-yl)benzoate (3pa):**

**<sup>1</sup>H NMR (CDCl<sub>3</sub>, 500 MHz)**

TK-NB-BOR-13C 3. f2  
TK-NB-BOR-13C

166.562  
152.358  
152.323  
143.290  
139.892  
139.865  
133.561  
132.593  
132.578  
132.293  
132.265  
129.877  
129.745  
128.975  
128.831  
127.422  
126.329  
125.371  
120.745  
115.842  
81.016  
77.414  
77.160  
76.906  
75.974  
75.958  
49.289  
48.044  
45.157  
37.044  
37.010  
28.230  
27.554  
19.867  
19.061  
13.769

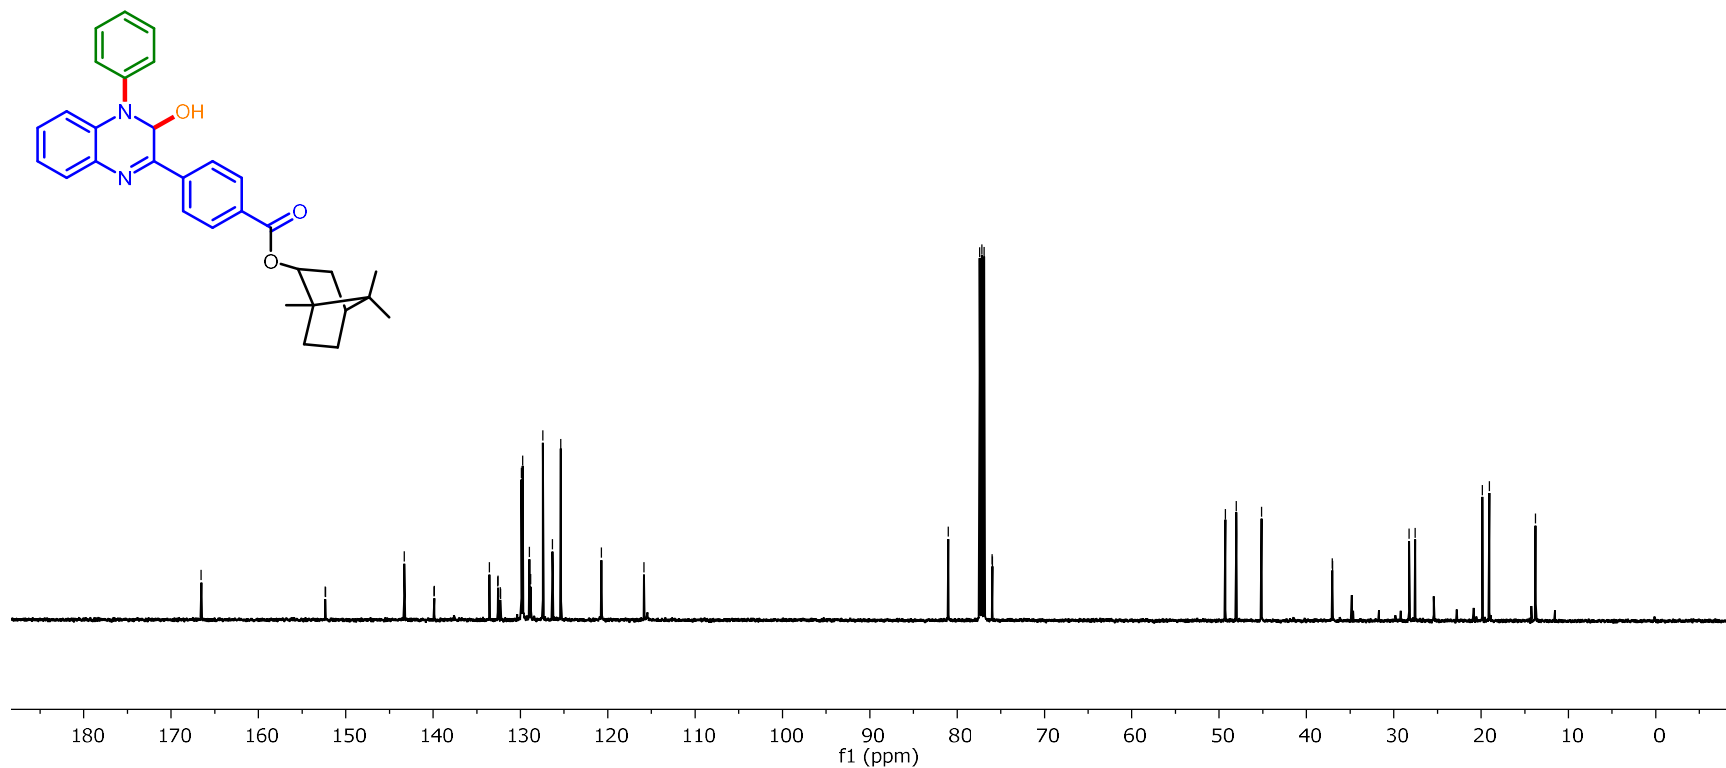

**(4R)-1,7,7-Trimethylbicyclo[2.2.1]heptan-2-yl 4-((S)-3-hydroxy-4-phenyl-3,4-dihydroquinoxalin-2-yl)benzoate (3pa): <sup>13</sup>C{<sup>1</sup>H} NMR (CDCl<sub>3</sub>, 126 MHz)**

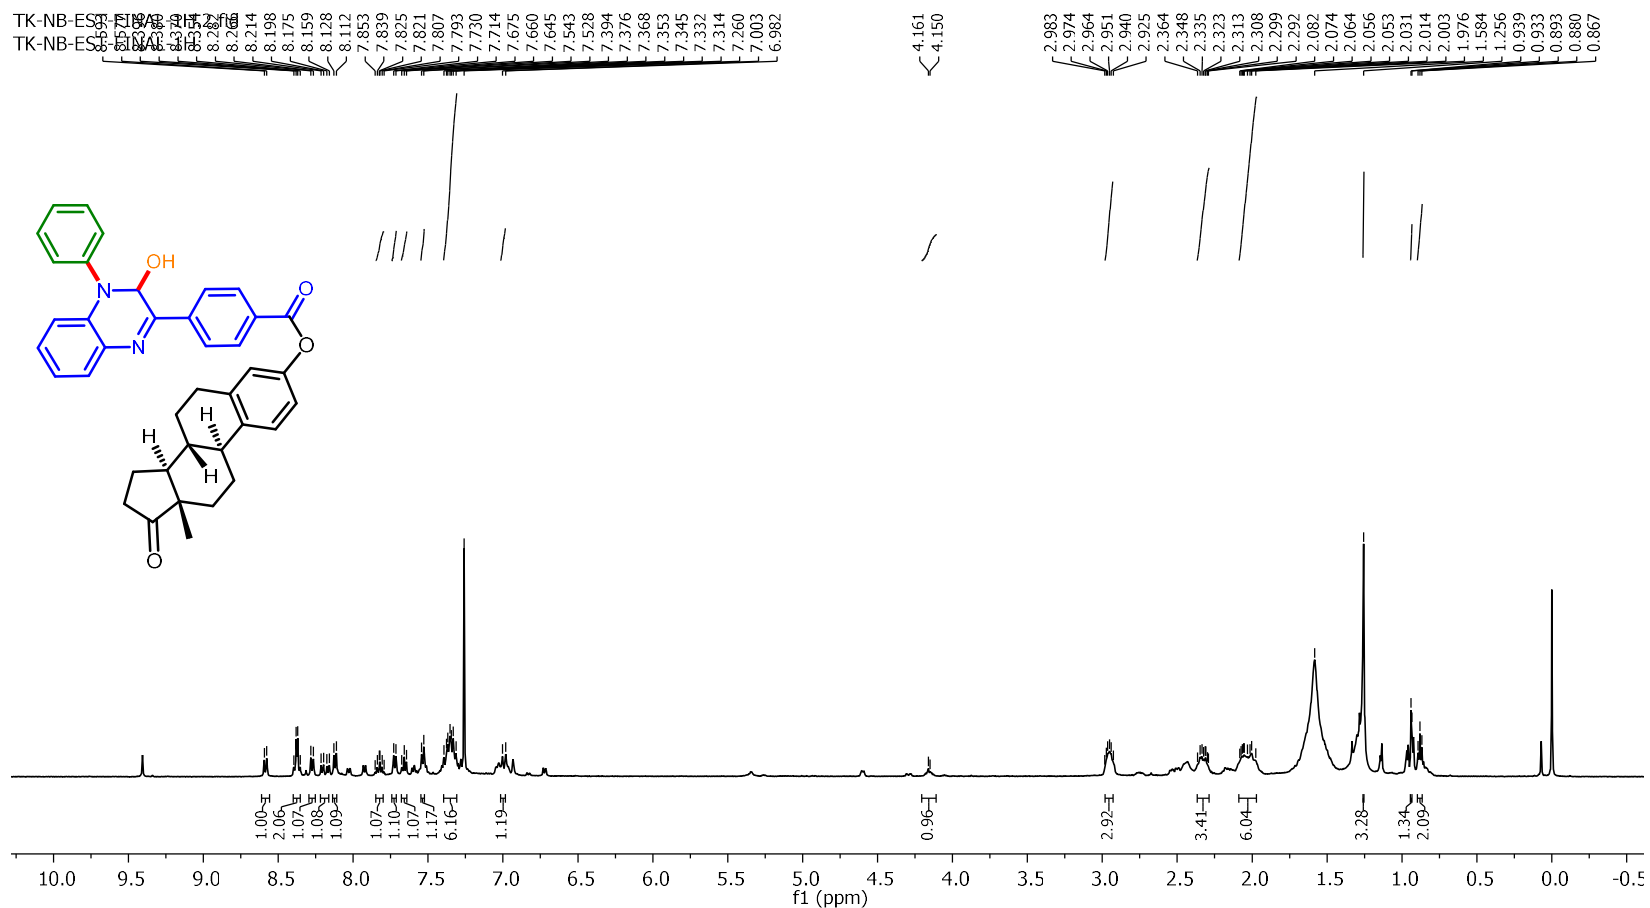

**(8*R*,9*S*,13*S*,14*S*)-13-Methyl-17-oxo-7,8,9,11,12,13,14,15,16,17-decahydro-6*H*-cyclopenta[*a*]phenanthren-3-yl 4-((*S*)-3-hydroxy-4-phenyl-3,4-dihydroquinoxalin-2-yl)benzoate (3qa): <sup>1</sup>H NMR (CDCl<sub>3</sub>, 500 MHz)**



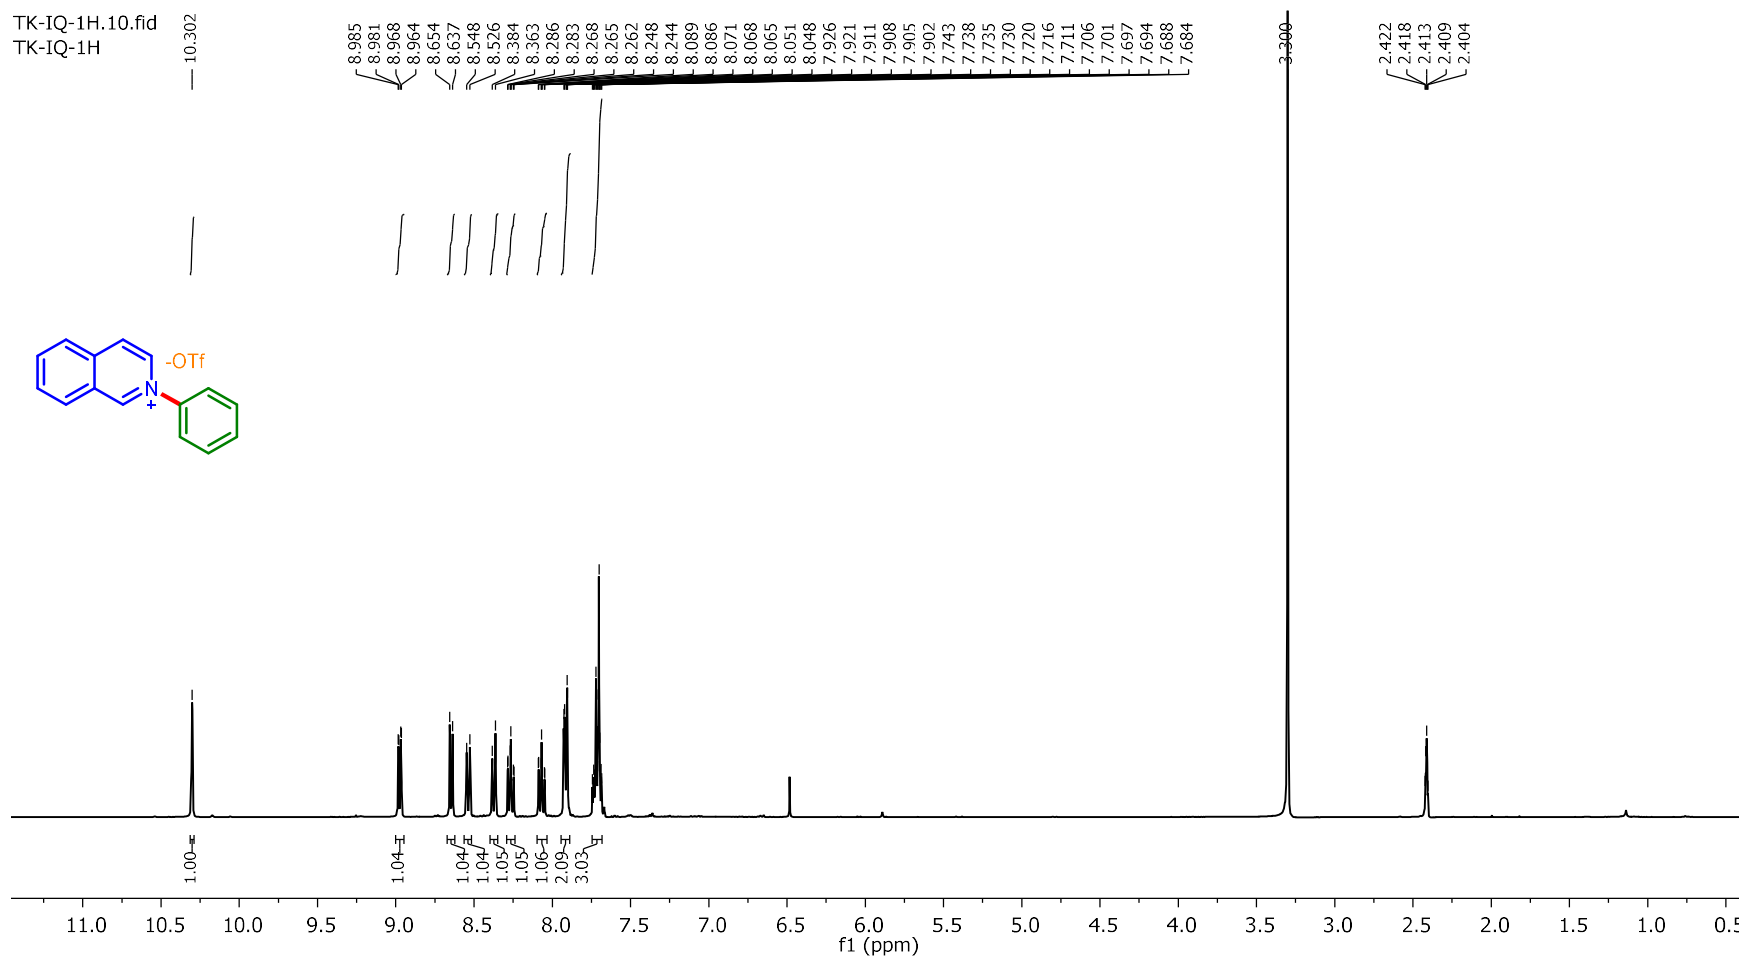

**2-Phenylisoquinolin-2-ium trifluoromethanesulfonate (7'):  $^1\text{H}$  NMR (DMSO- $d_6$ , 400 MHz)**



TK-IQ-13C.12.fid  
TK-IQ-13C

150.504  
143.001  
137.680  
137.269  
134.955  
131.475  
131.240  
131.103  
130.252  
127.369  
127.287  
125.752  
124.958

40.127  
39.917  
39.710  
39.499  
39.291  
39.083  
38.874

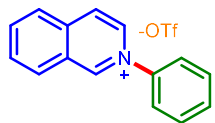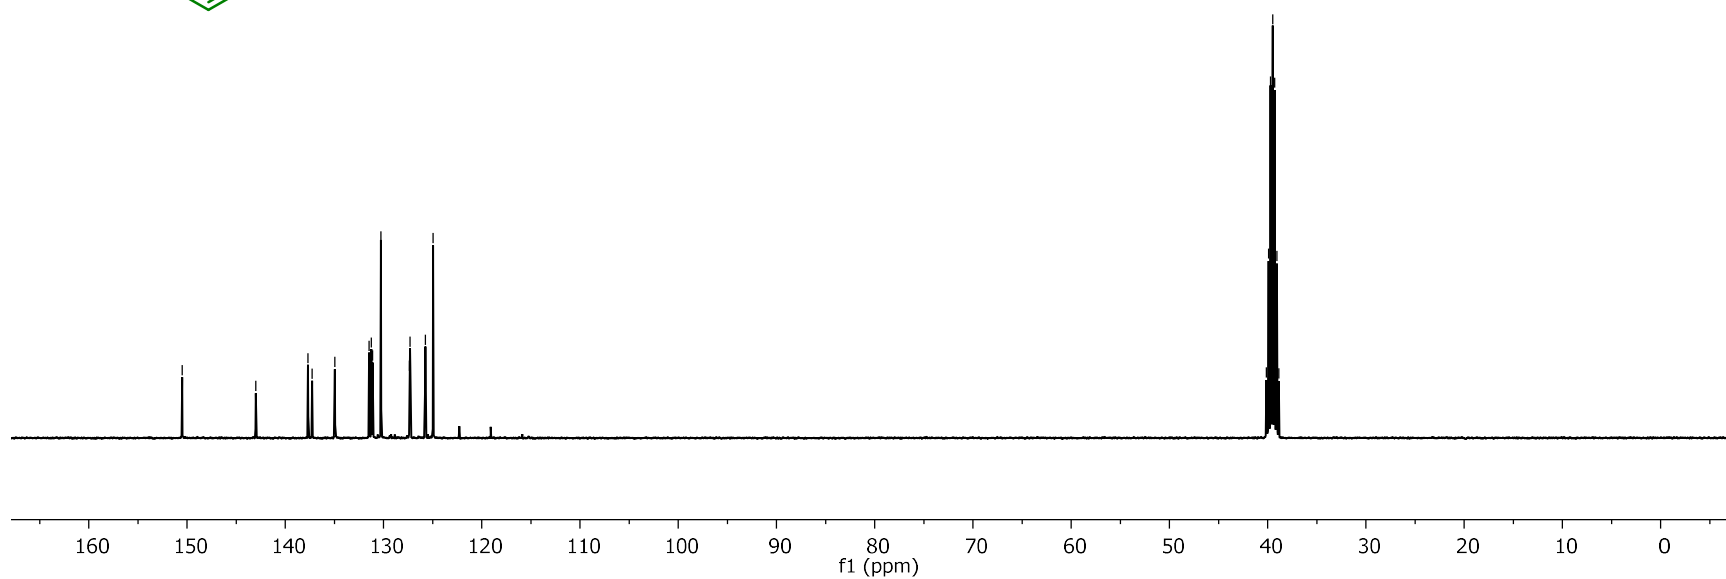

**2-Phenylisoquinolin-2-ium trifluoromethanesulfonate (7'):**  $^{13}\text{C}\{^1\text{H}\}$  NMR (DMSO- $d_6$ , 101 MHz)

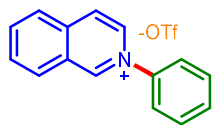

— -78.102

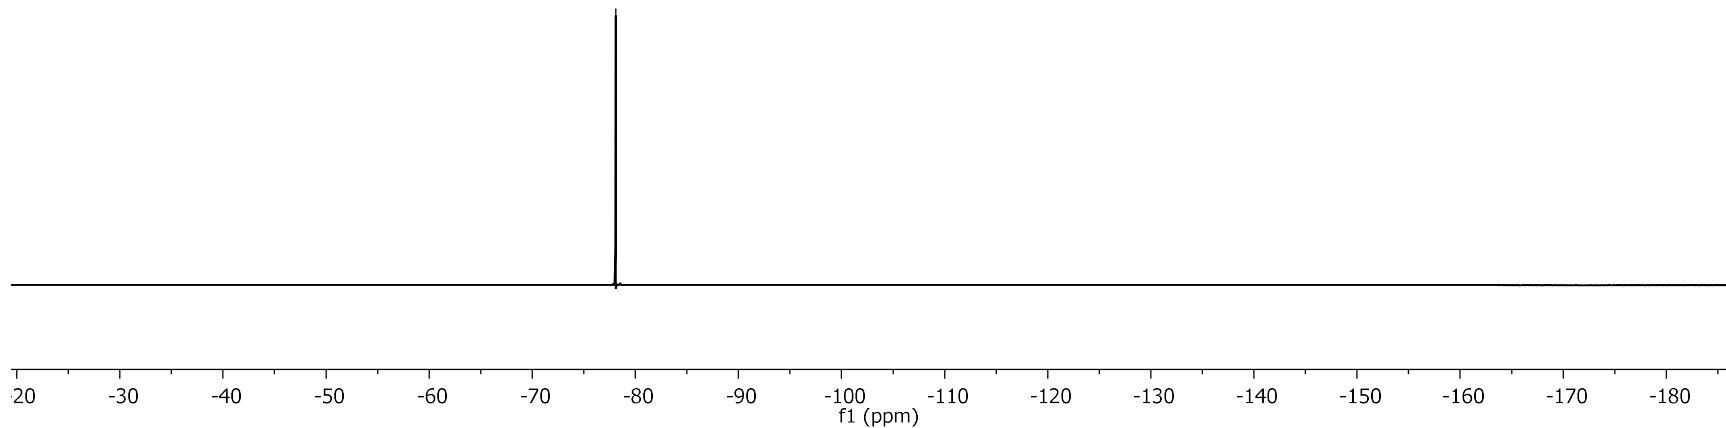

**2-Phenylisoquinolin-2-ium trifluoromethanesulfonate (7'):  $^{19}\text{F}$  NMR (DMSO- $d_6$ , 471 MHz)**

TK-QBLACK-1H  
1H

8.228  
8.168  
8.174  
8.171  
8.162  
8.160  
8.158  
7.890  
7.875  
7.841  
7.827  
7.744  
7.731  
7.718  
7.545  
7.542  
7.533  
7.523  
7.520  
7.480  
7.467  
7.455  
7.256

1.610

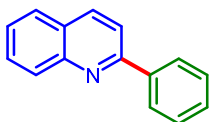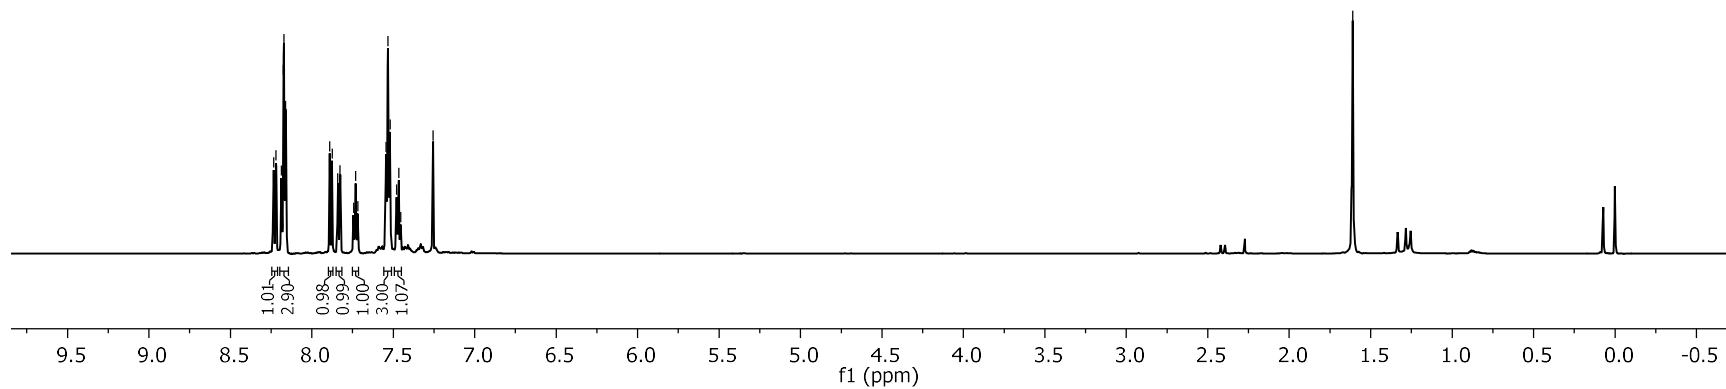

**2-Phenylquinoline (8'):**  $^1\text{H}$  NMR ( $\text{CDCl}_3$ , 600 MHz)

TK-QBLACK-13C.11.16  
13C

157.561  
148.437  
139.848  
136.931  
129.886  
129.807  
129.462  
128.992  
127.726  
127.606  
127.334  
126.433  
119.182

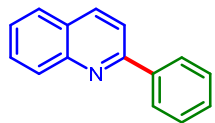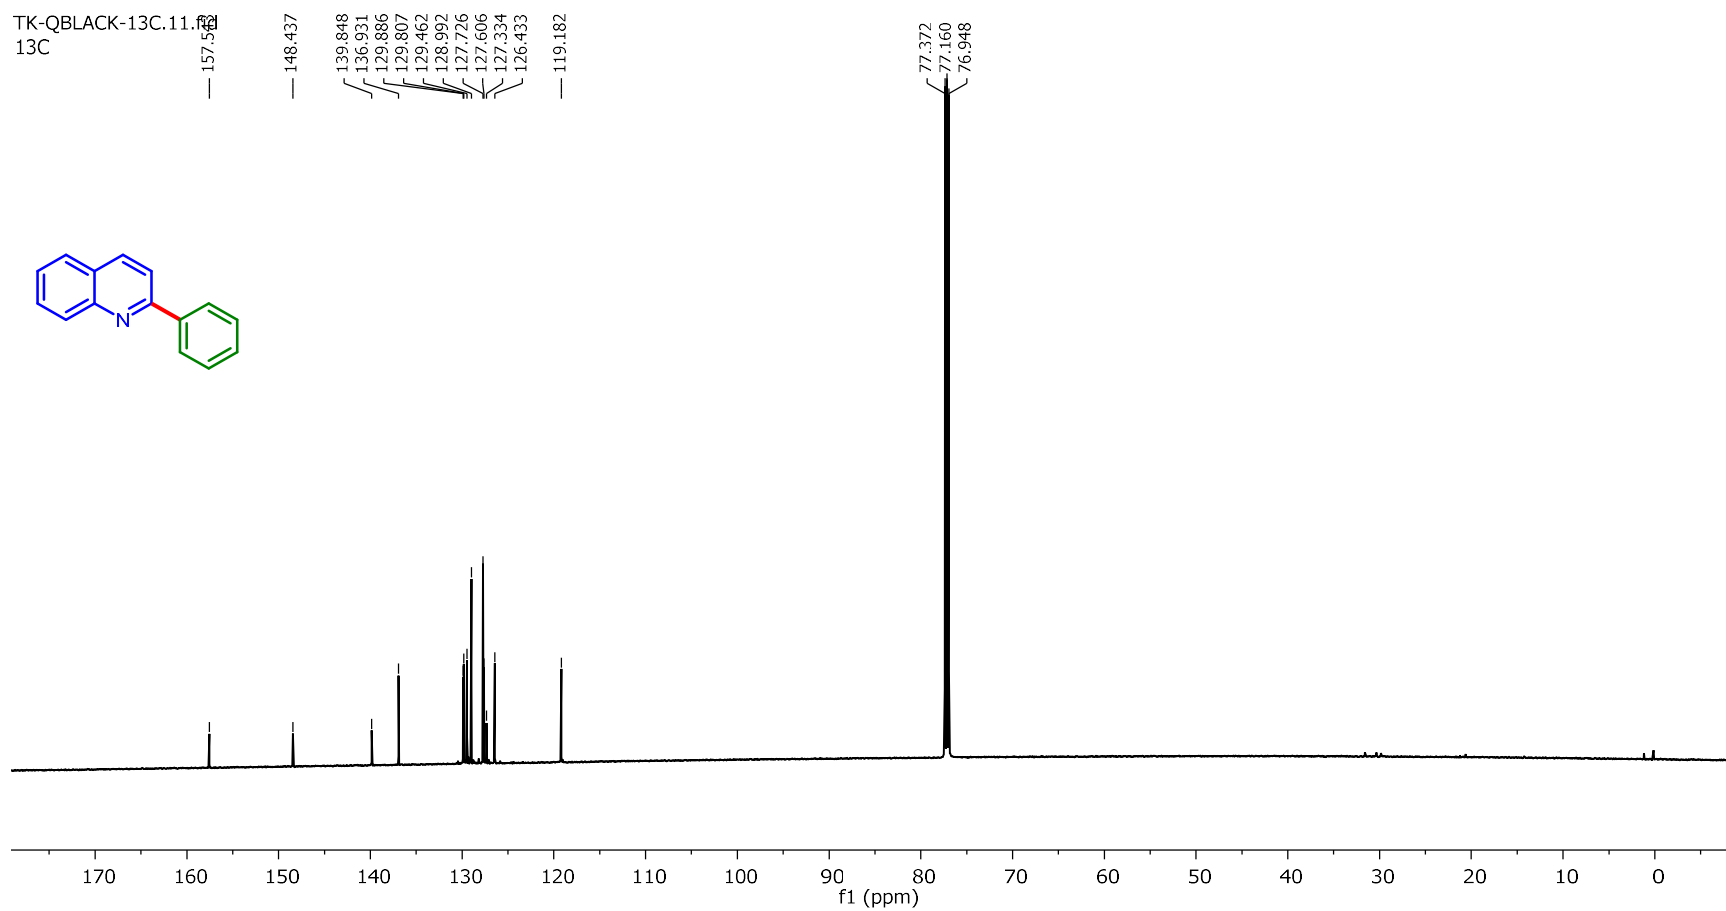

2-Phenylquinoline (8'):  $^{13}\text{C}\{^1\text{H}\}$  NMR ( $\text{CDCl}_3$ , 151 MHz)

TK-5Me-BI-1H.1.fid  
TK-5Me-BI-1H

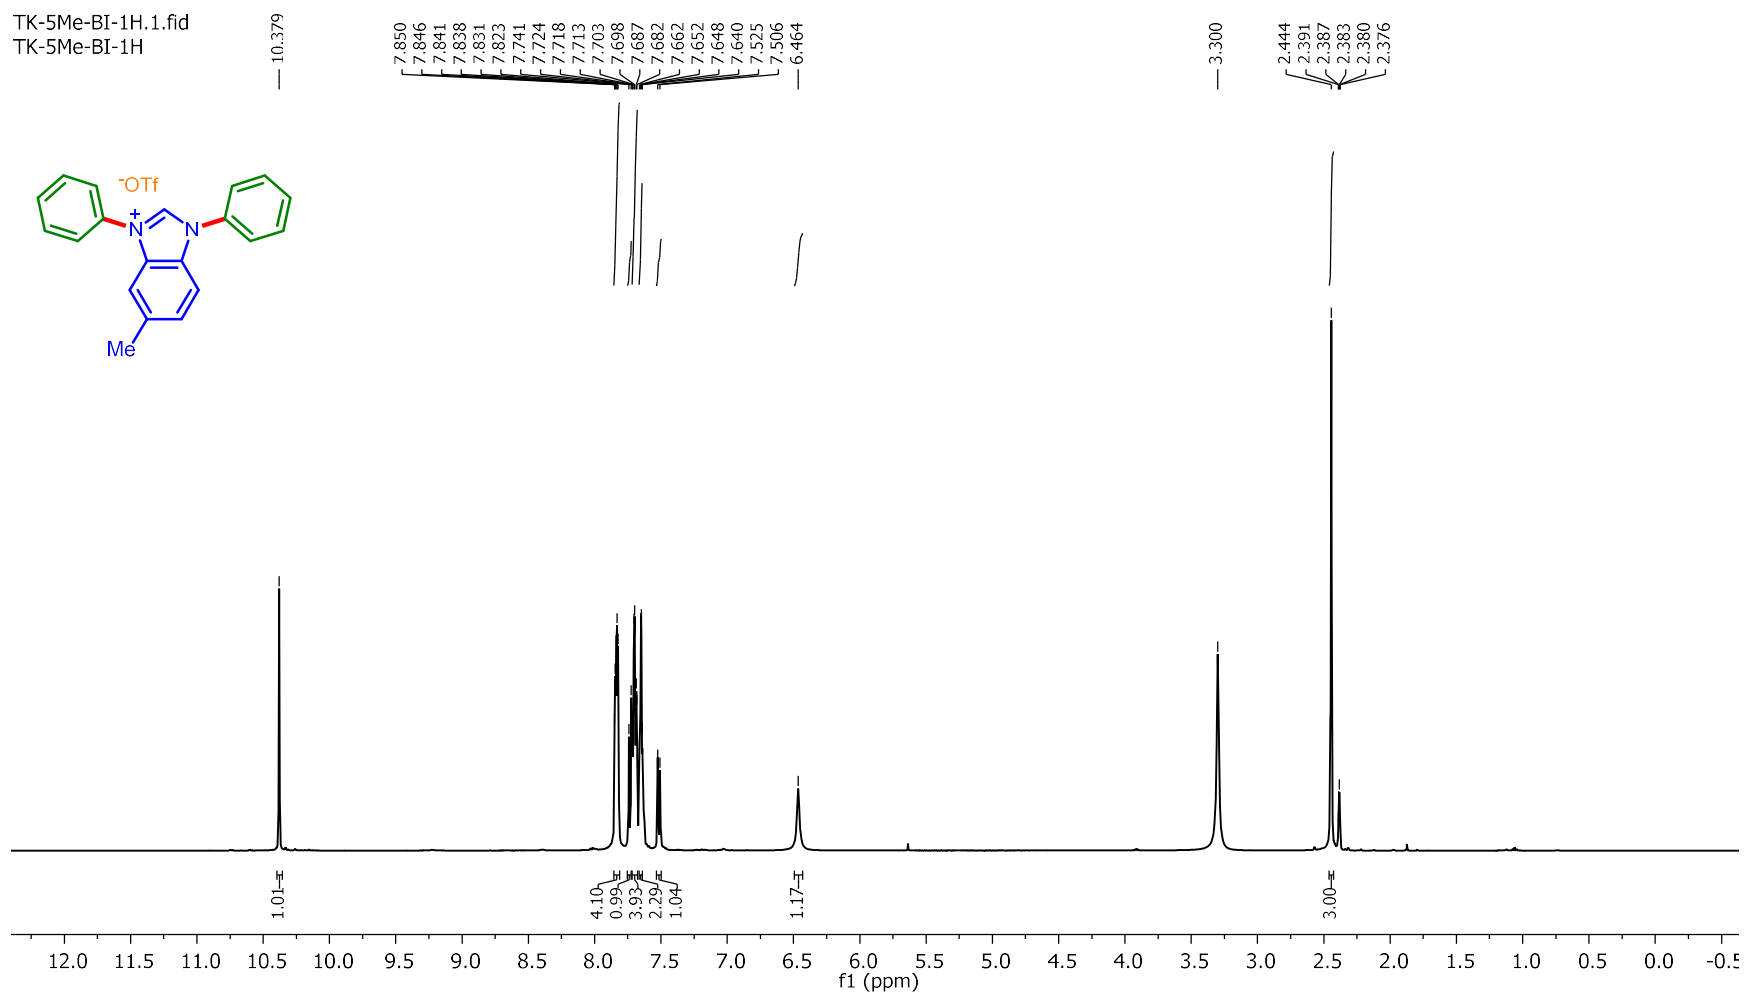

**5-Methyl-1,3-diphenyl-1H-benzo[d]imidazol-3-ium trifluoromethanesulfonate (10aa):  $^1\text{H}$  NMR (DMSO- $d_6$ , 500 MHz)**

TK-5ME-BI-13C.1.fid  
TK-5ME-BI-13C

142.247  
138.372  
133.132  
131.532  
130.695  
130.459  
130.456  
129.353  
129.233  
125.469  
125.254  
113.432  
113.175

40.001  
39.835  
39.668  
39.501  
39.334  
39.166  
39.001

21.106

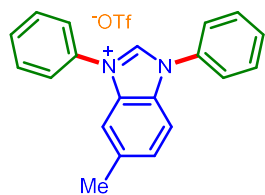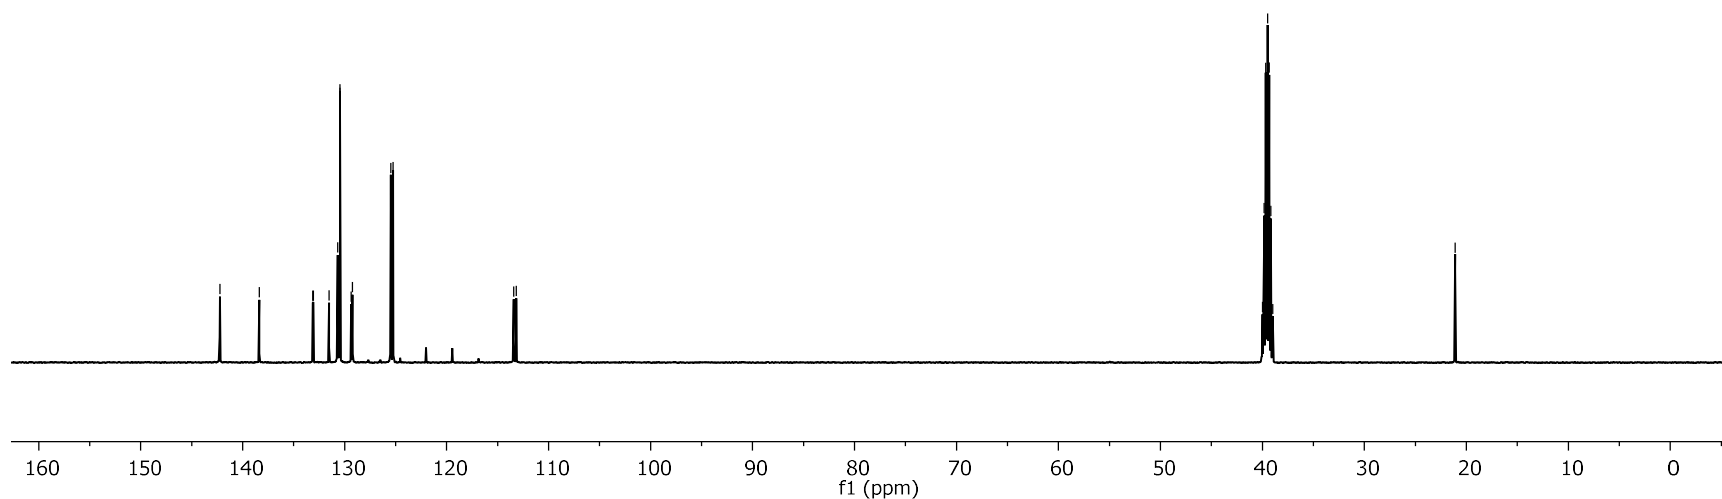

**5-Methyl-1,3-diphenyl-1H-benzo[d]imidazol-3-ium trifluoromethanesulfonate (10aa):  $^{13}\text{C}\{^1\text{H}\}$  NMR (DMSO- $d_6$ , 126 MHz)**

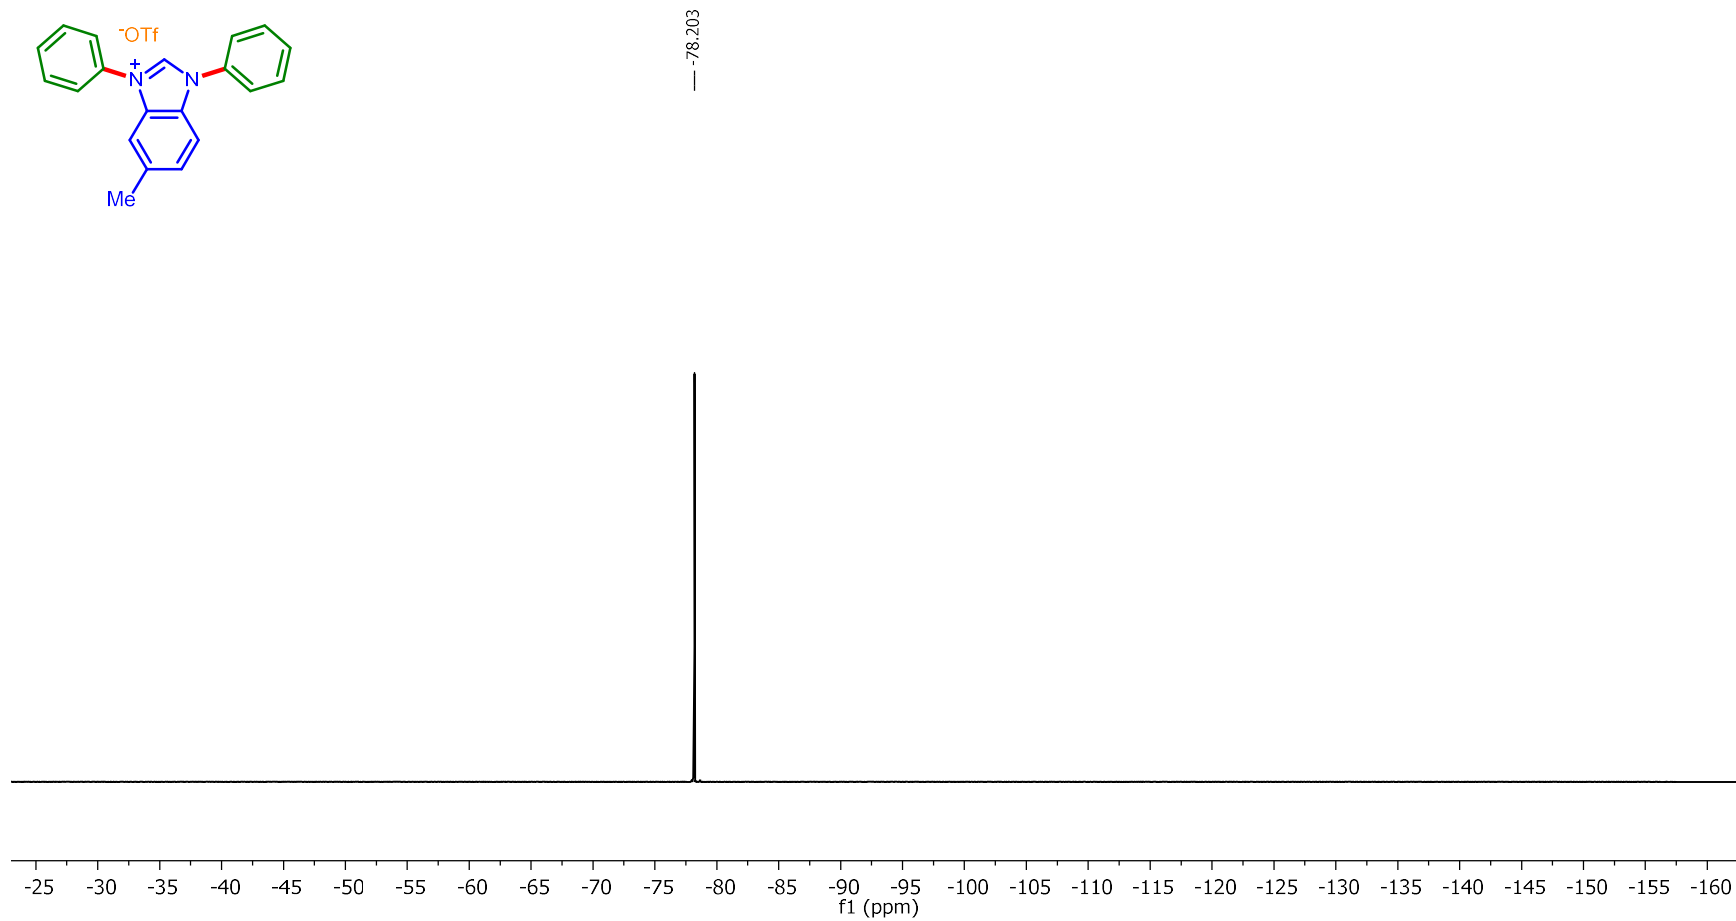

**5-Methyl-1,3-diphenyl-1H-benzo[d]imidazol-3-ium trifluoromethanesulfonate (10aa):  $^{19}\text{F}$  NMR (DMSO- $d_6$ , 471 MHz)**

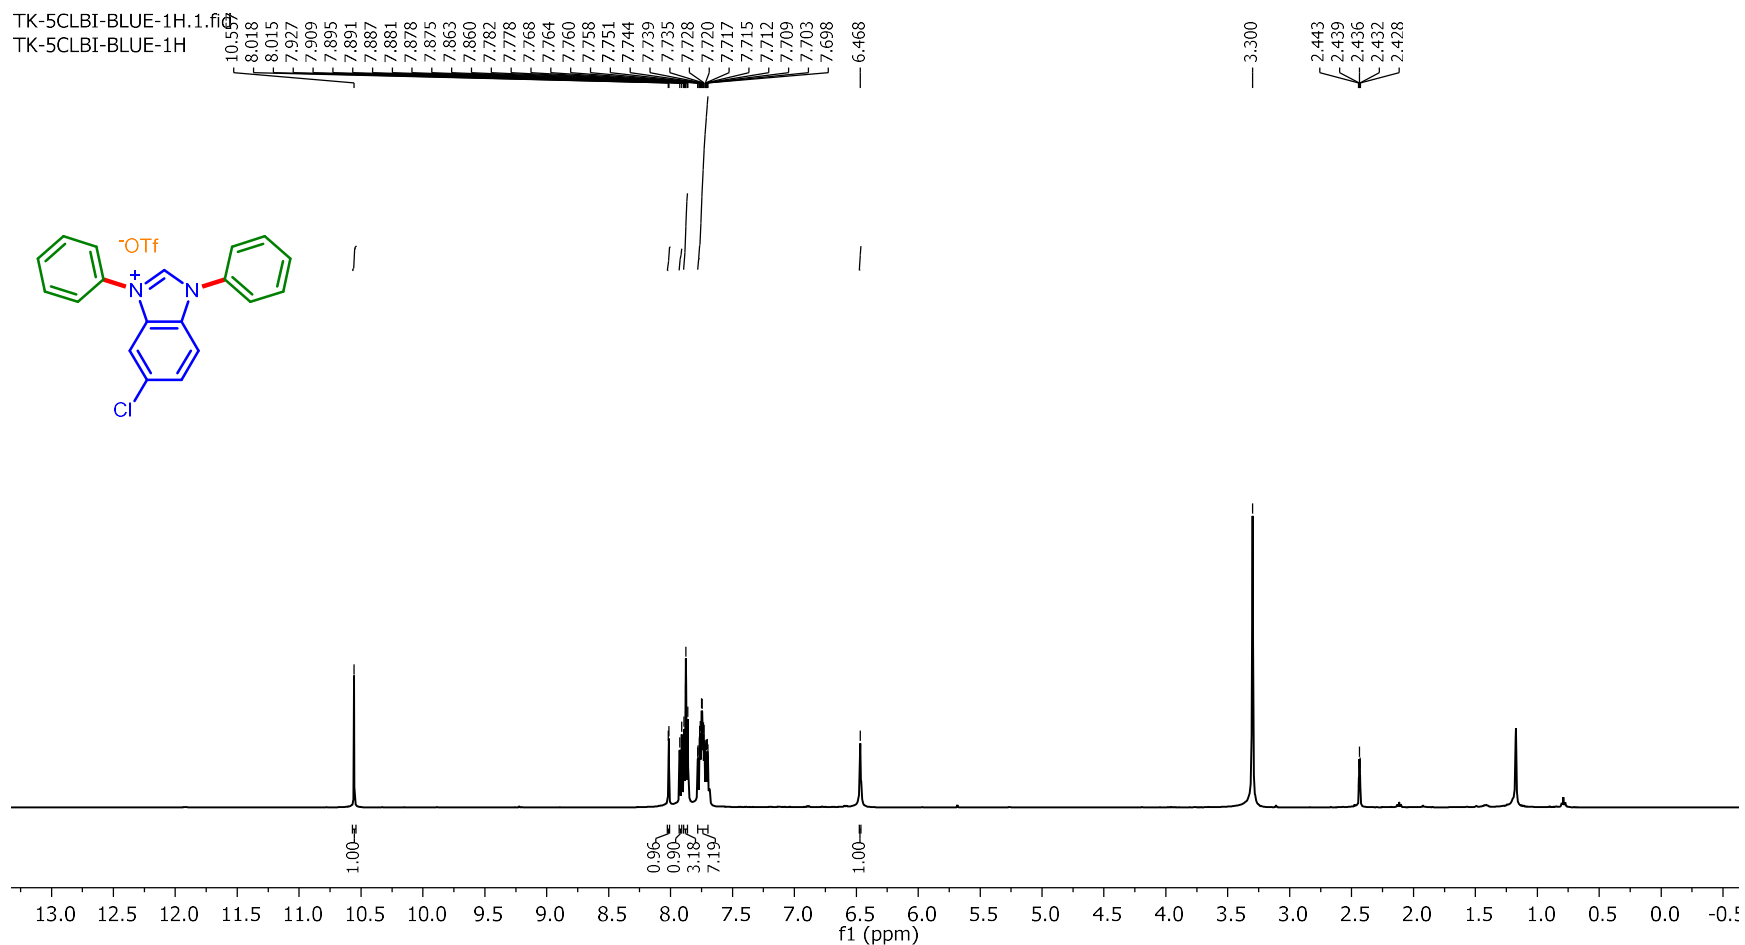

**5-Chloro-1,3-diphenyl-1H-benzo[d]imidazol-3-ium trifluoromethanesulfonate (10ba):<sup>1</sup>H NMR (DMSO-d<sub>6</sub>, 500 MHz)**



TK-5CLB1-BLUE-13C.1.fid  
TK-5CLB1-BLUE-13C

143.882  
132.718  
132.663  
132.439  
131.995  
130.884  
130.834  
130.448  
130.177  
128.174  
125.361  
125.293  
115.503  
113.729

40.001  
39.834  
39.667  
39.501  
39.333  
39.166  
39.000

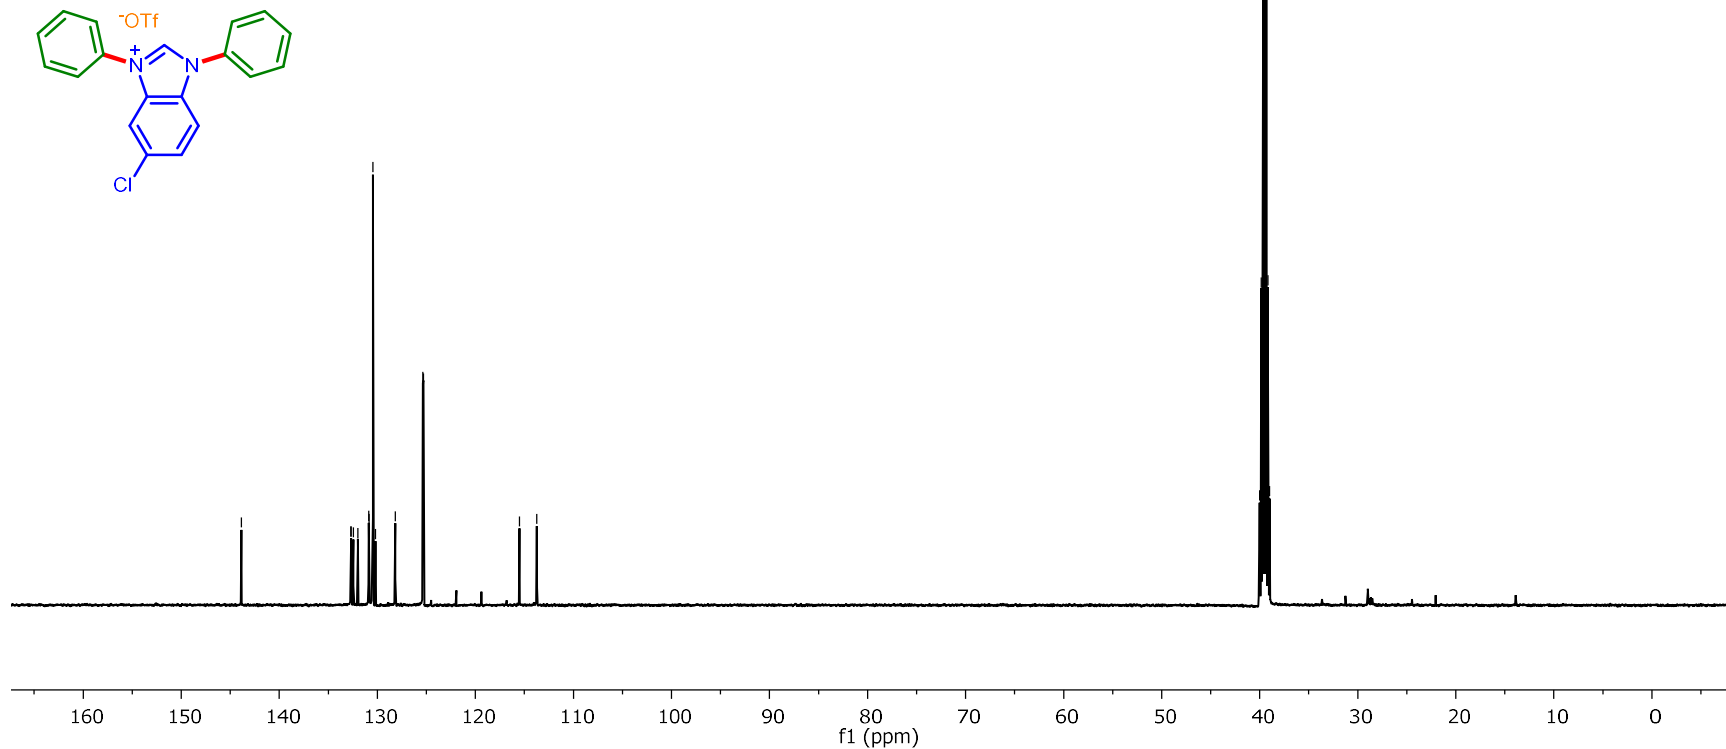

**5-Chloro-1,3-diphenyl-1*H*-benzo[*d*]imidazol-3-ium trifluoromethanesulfonate (10ba):  $^{13}\text{C}\{^1\text{H}\}$  NMR (DMSO- $d_6$ , 126 MHz)**

TK-5CLBI-BLUE-19F.1.fid  
TK-5CLBI-BLUE-19F

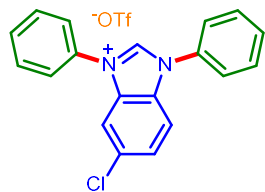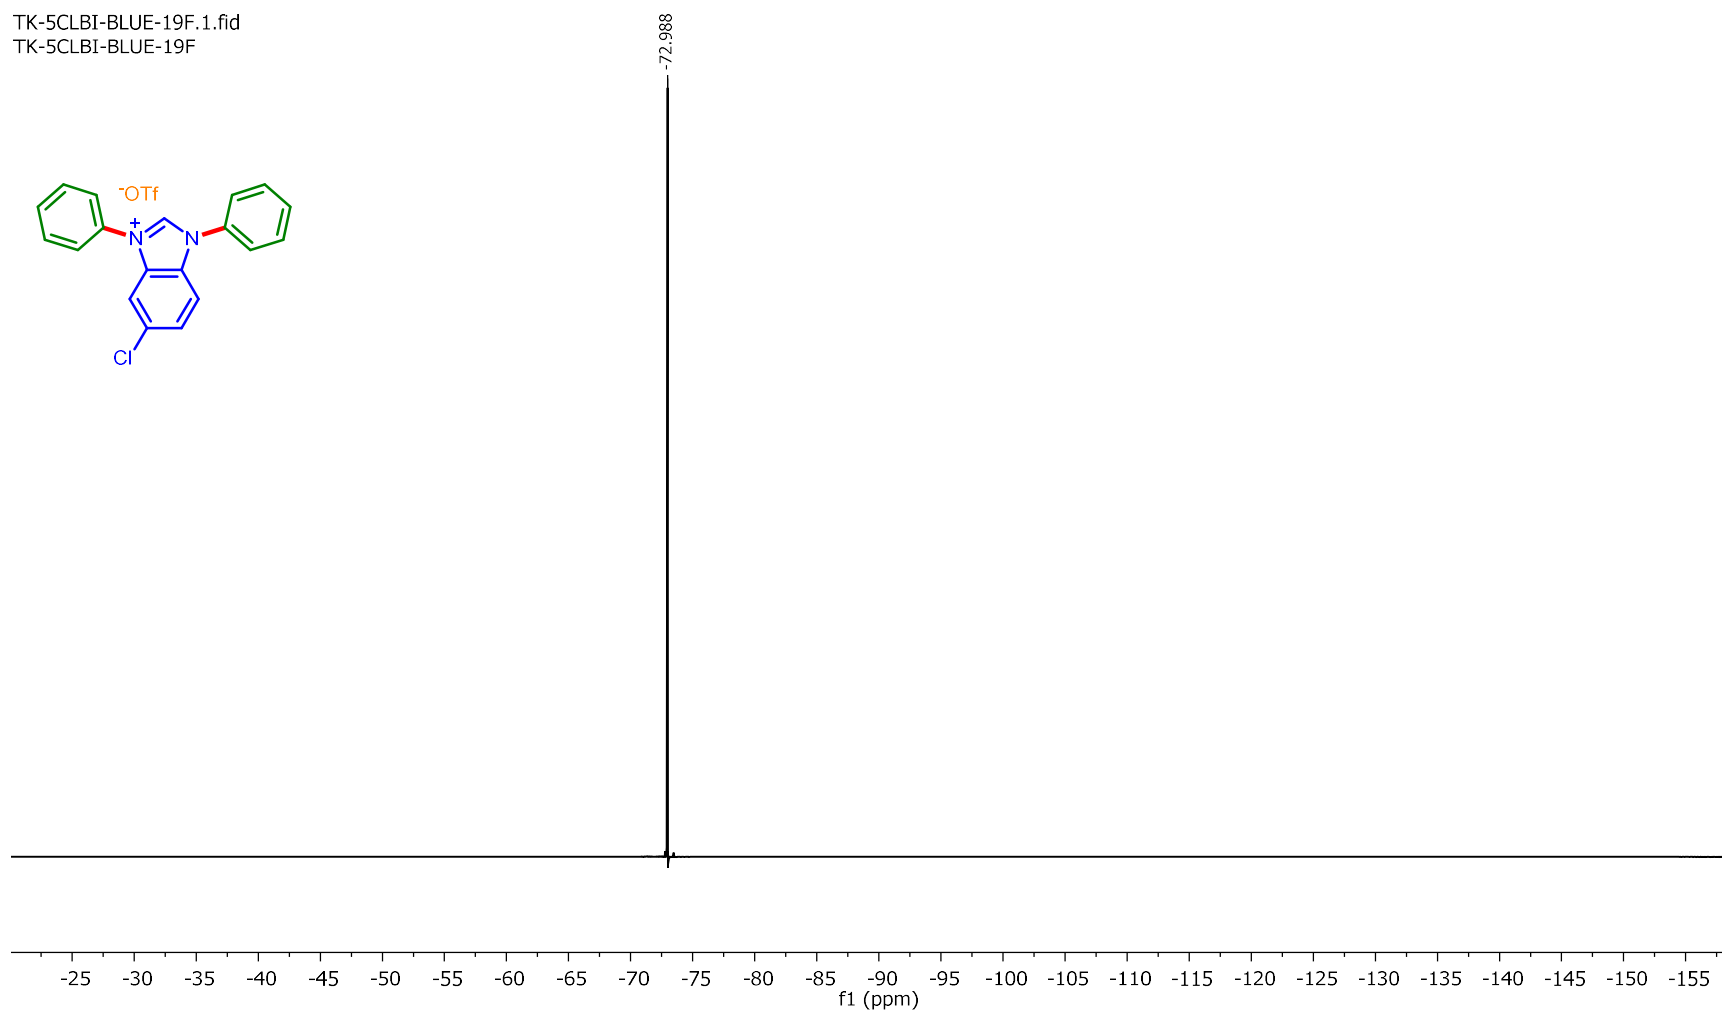

**5-Chloro-1,3-diphenyl-1*H*-benzo[d]imidazol-3-ium trifluoromethanesulfonate (10ba): <sup>19</sup>F NMR (DMSO-*d*<sub>6</sub>, 471 MHz)**

TK-BIM-BLVE-101-1H.10.fid  
TK-BIM-BLVE-101-1H

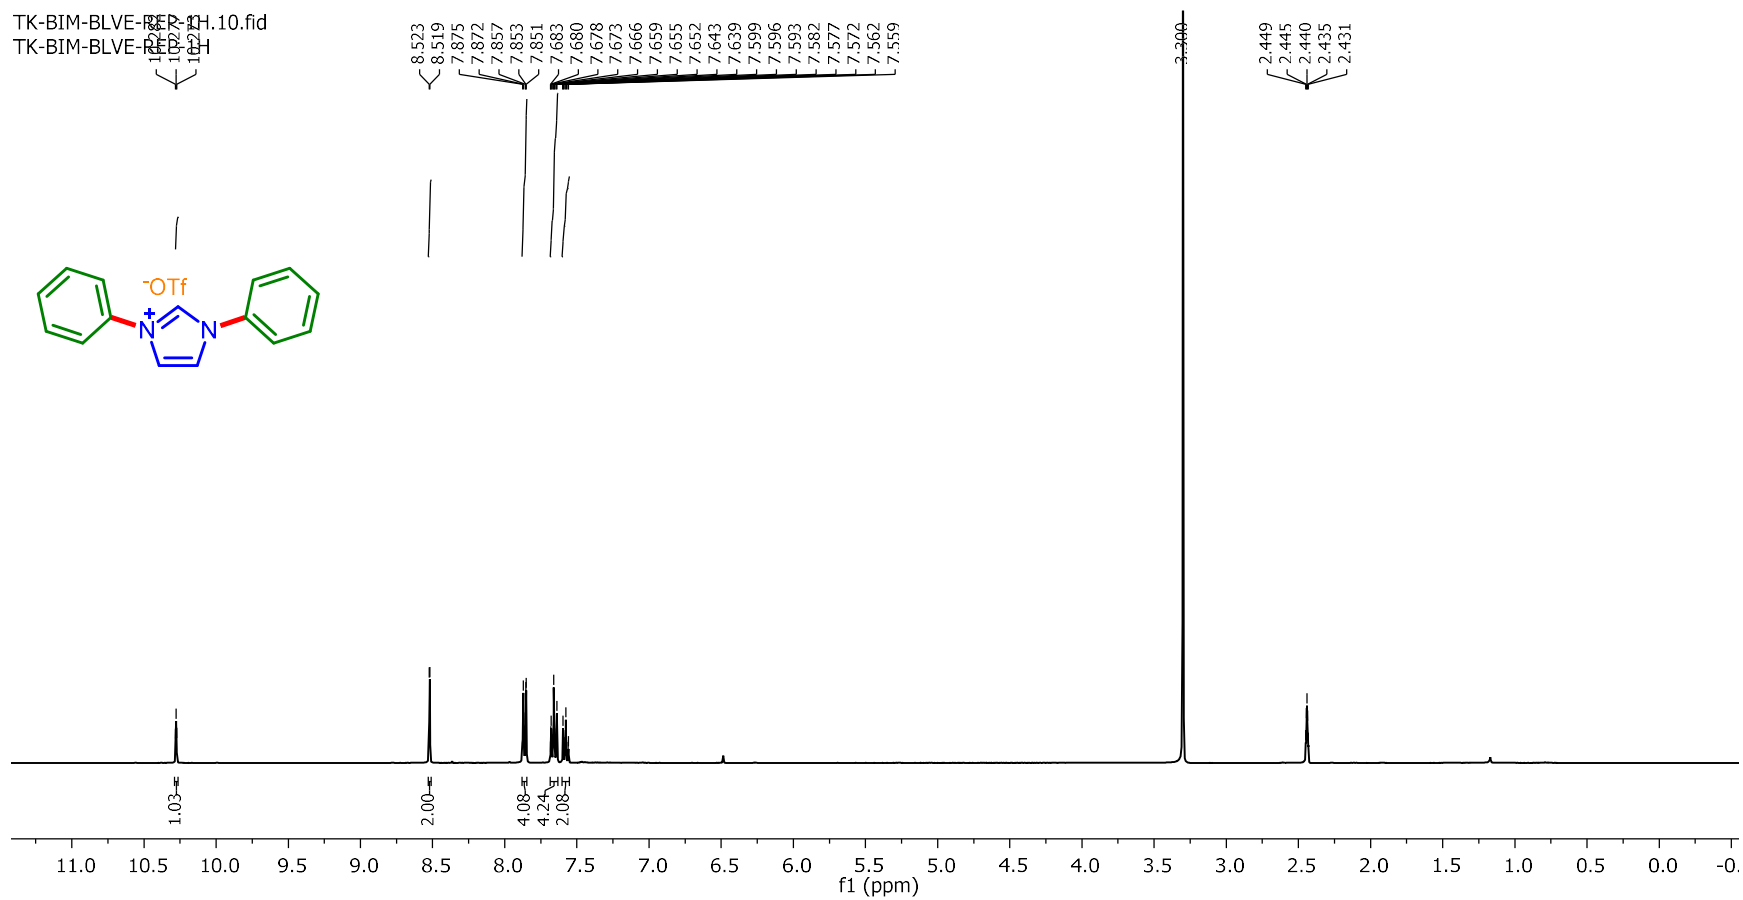

1,3-Diphenyl-1*H*-imidazol-3-ium trifluoromethanesulfonate (10ca): <sup>1</sup>H NMR (DMSO-d<sub>6</sub>, 400 MHz)

TK-BIM0BLUE-REP-13C.10.fid  
TK-BIM0BLUE-REP-13C

134.703  
134.573  
130.197  
130.071  
122.092  
121.972

40.127  
39.918  
39.710  
39.500  
39.291  
39.084  
38.874

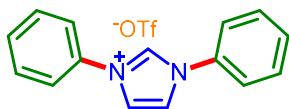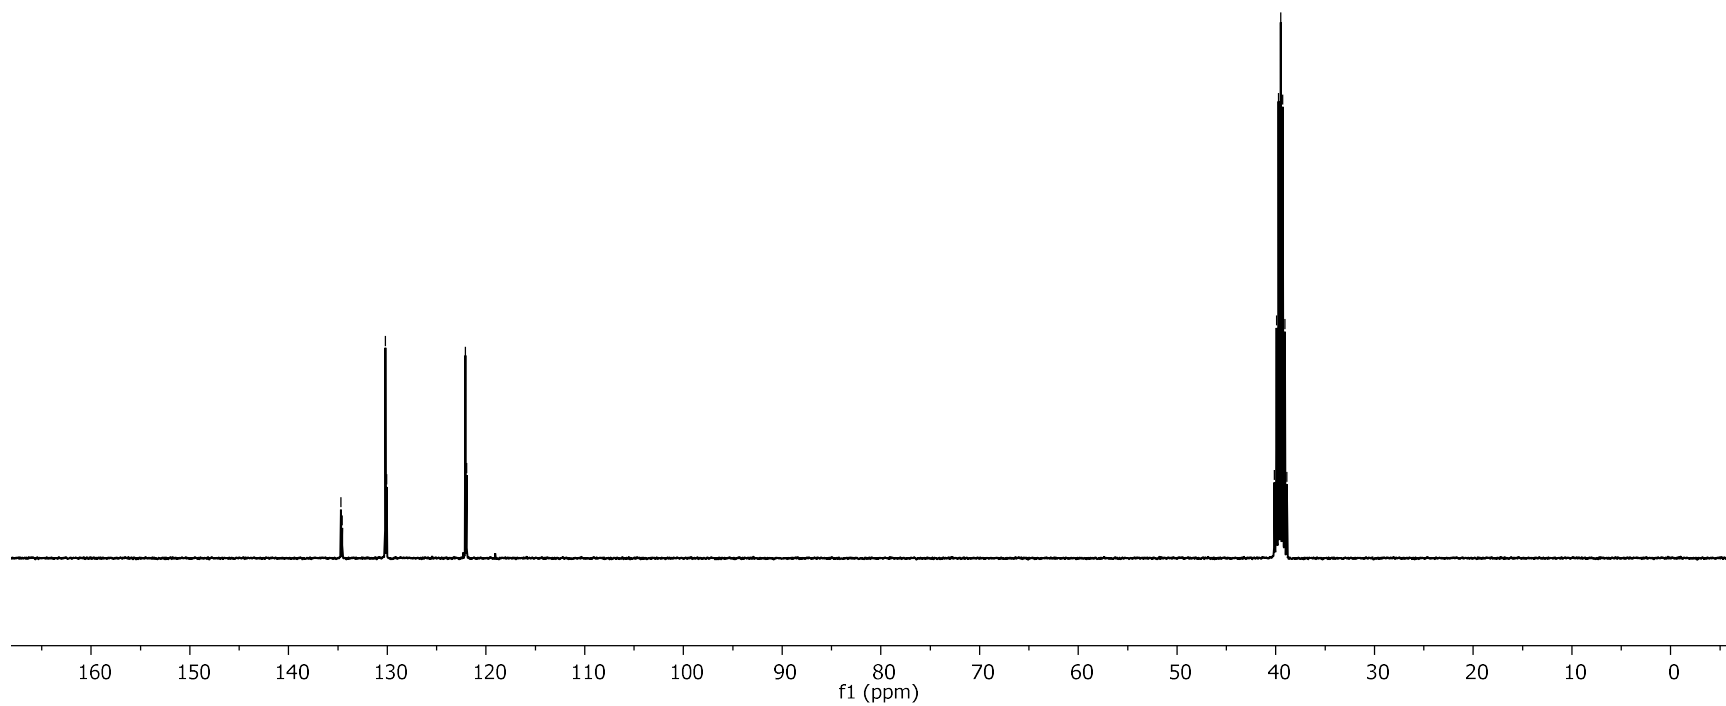

**1,3-Diphenyl-1*H*-imidazol-3-ium trifluoromethanesulfonate (10ca):  $^{13}\text{C}\{^1\text{H}\}$  NMR (DMSO- $d_6$ , 101 MHz)**

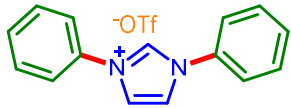

— -77.975

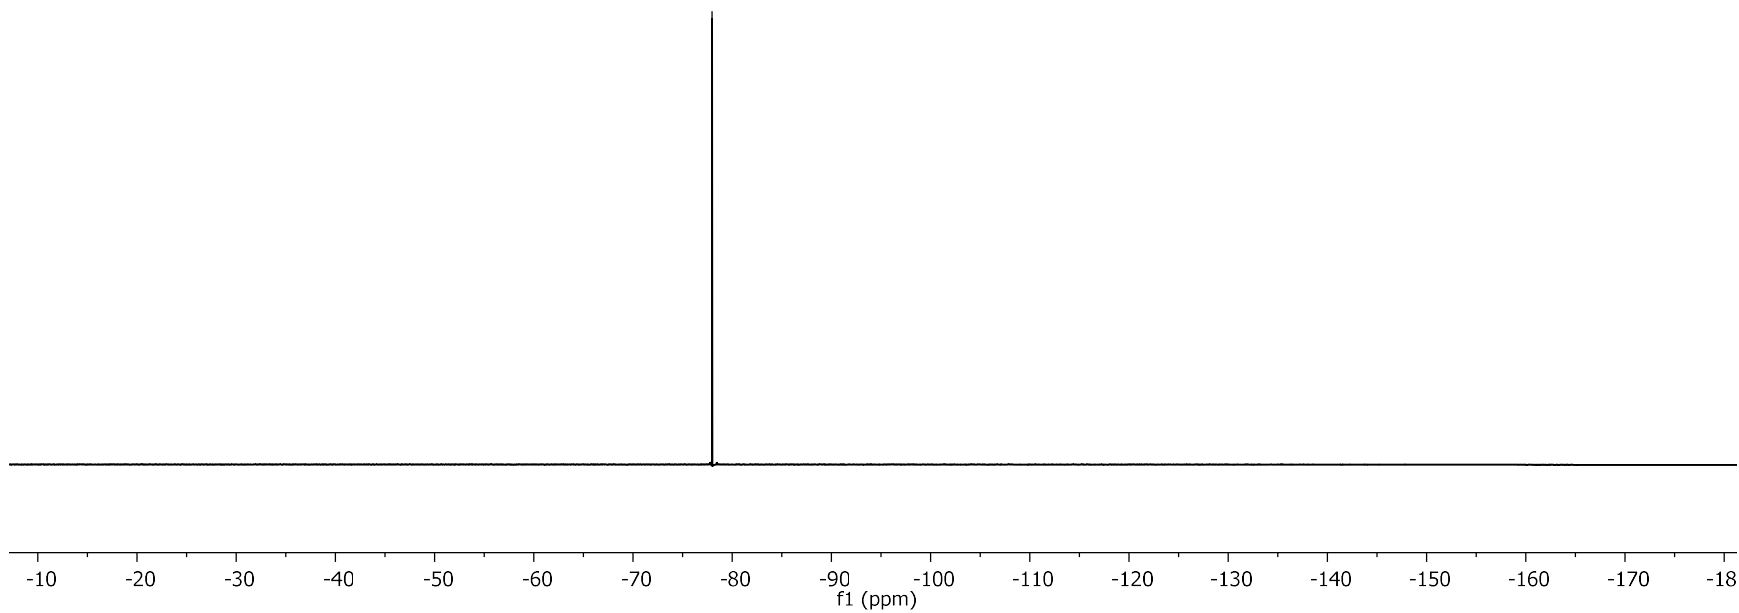

**1,3-Diphenyl-1*H*-imidazol-3-ium trifluoromethanesulfonate (10ca):  $^{19}\text{F}$  NMR (DMSO- $d_6$ , 471 MHz)**

TK-VIM-OLUE-1H.1.fid  
TK-VIM-OLUE-1H

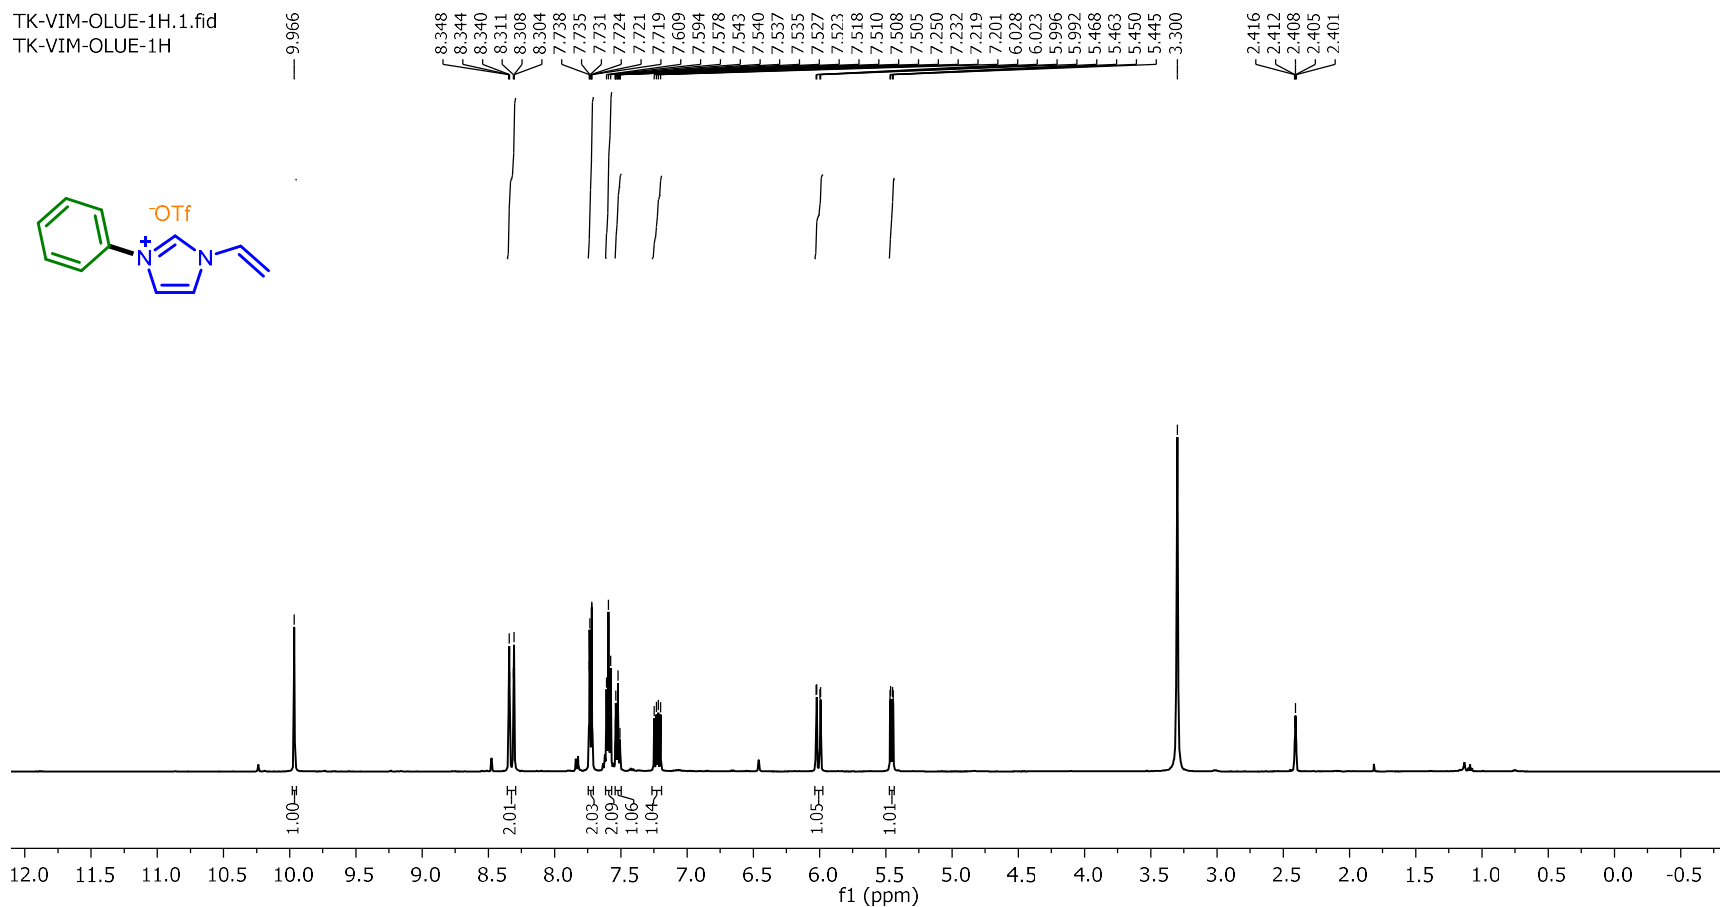

**3-Phenyl-1-vinyl-1H-imidazol-3-ium trifluoromethanesulfonate (10da):  $^1\text{H}$  NMR (DMSO- $d_6$ , 500 MHz)**

TK-VIM-BLUE-13C.12.fid  
TK-VIM-BLUE-13C

134.592  
134.516  
130.225  
130.086  
128.789  
122.030  
121.987  
120.084

109.804

40.128  
39.918  
39.710  
39.500  
39.291  
39.084  
38.875

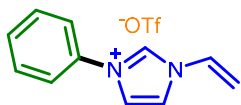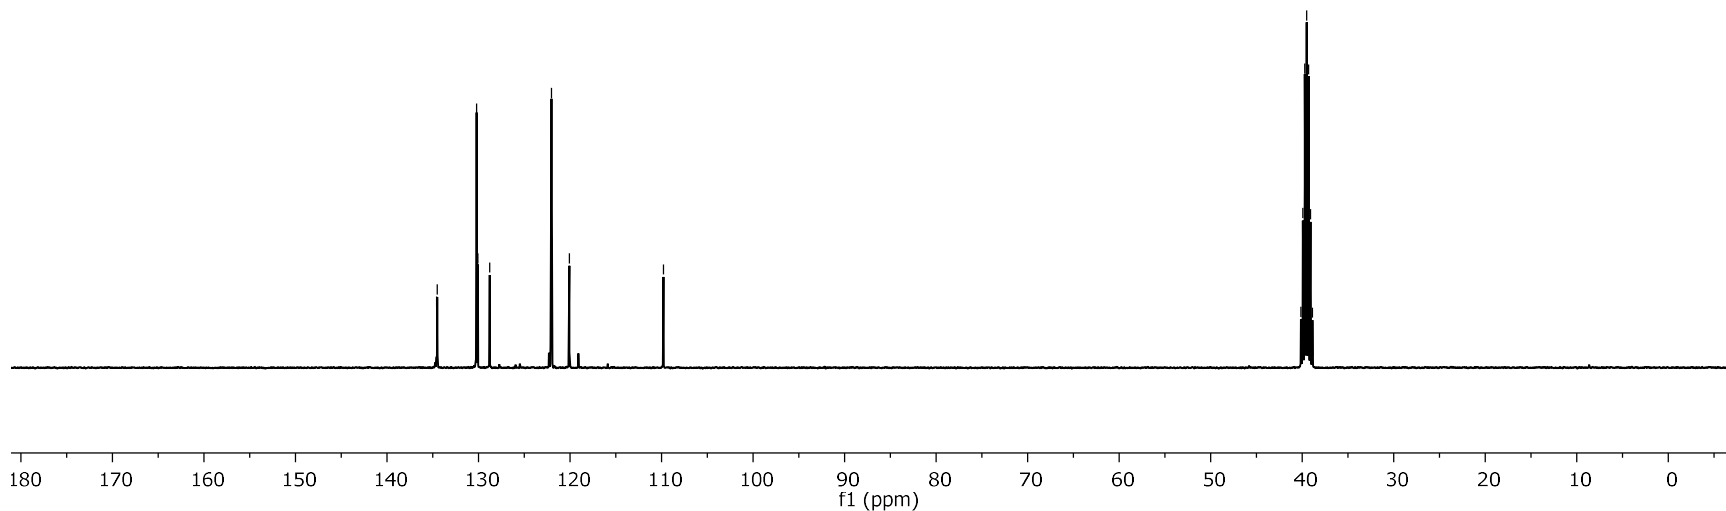

**3-Phenyl-1-vinyl-1*H*-imidazol-3-ium trifluoromethanesulfonate (10da):  $^{13}\text{C}\{^1\text{H}\}$  NMR (DMSO- $d_6$ , 101 MHz)**

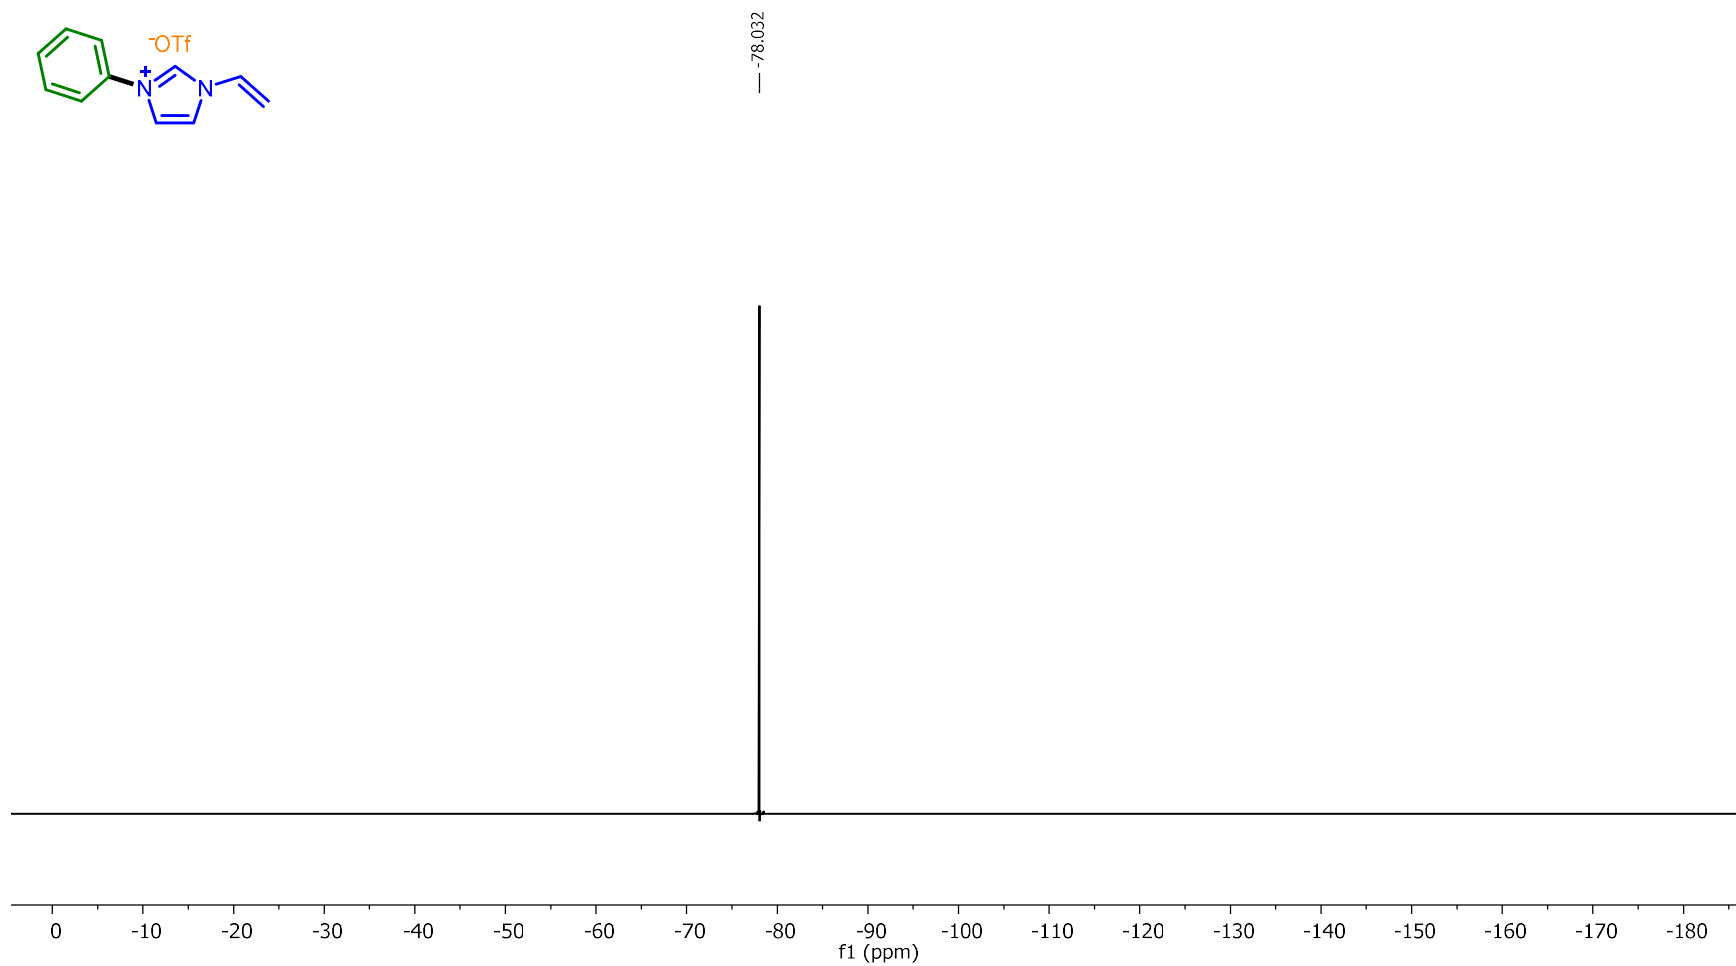

**3-Phenyl-1-vinyl-1*H*-imidazol-3-ium trifluoromethanesulfonate (10da):  $^{19}\text{F}$  NMR (DMSO- $d_6$ , 471 MHz)**



TK-2NAP-BLUE-1H.1.fid  
TK-2NAP-BLUE-1H

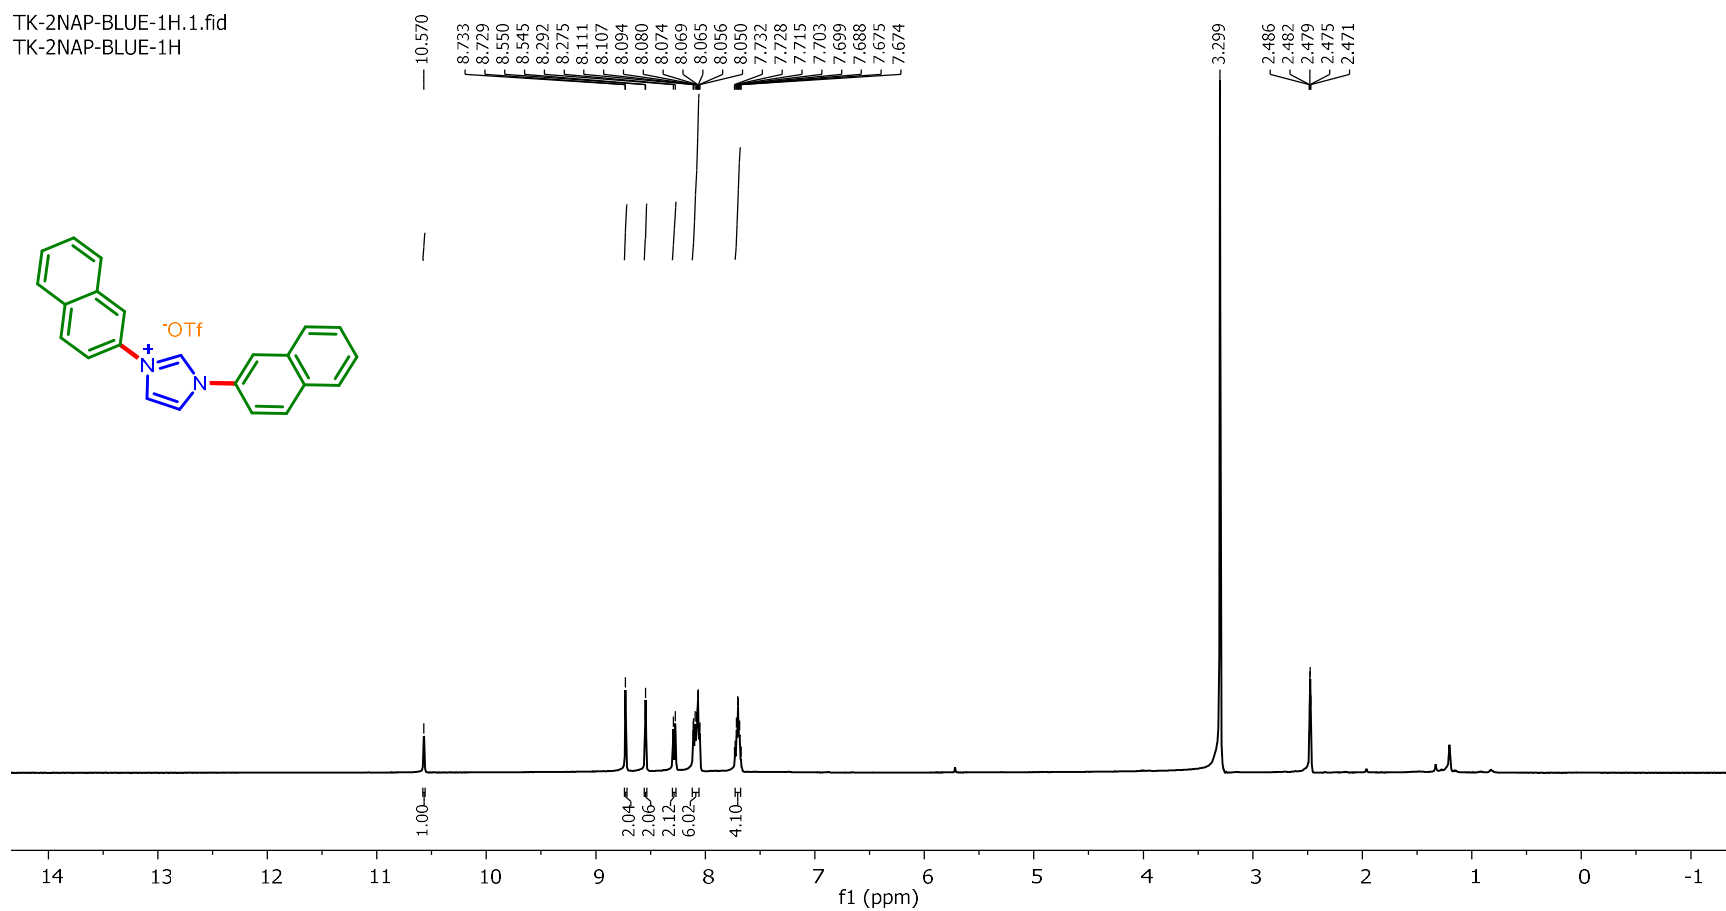

1,3-di(Naphthalen-2-yl)-1H-imidazol-3-ium trifluoromethanesulfonate (10cj):  $^1\text{H}$  NMR (DMSO- $d_6$ , 500 MHz)

TK-2NAP-BLUE-13C.3.fid  
TK-2NAP-BLUE-13C

134.852  
132.781  
132.537  
132.102  
130.309  
128.177  
128.011  
127.971  
127.779  
122.136  
120.507  
119.693

40.001  
39.835  
39.666  
39.501  
39.333  
39.166  
39.000

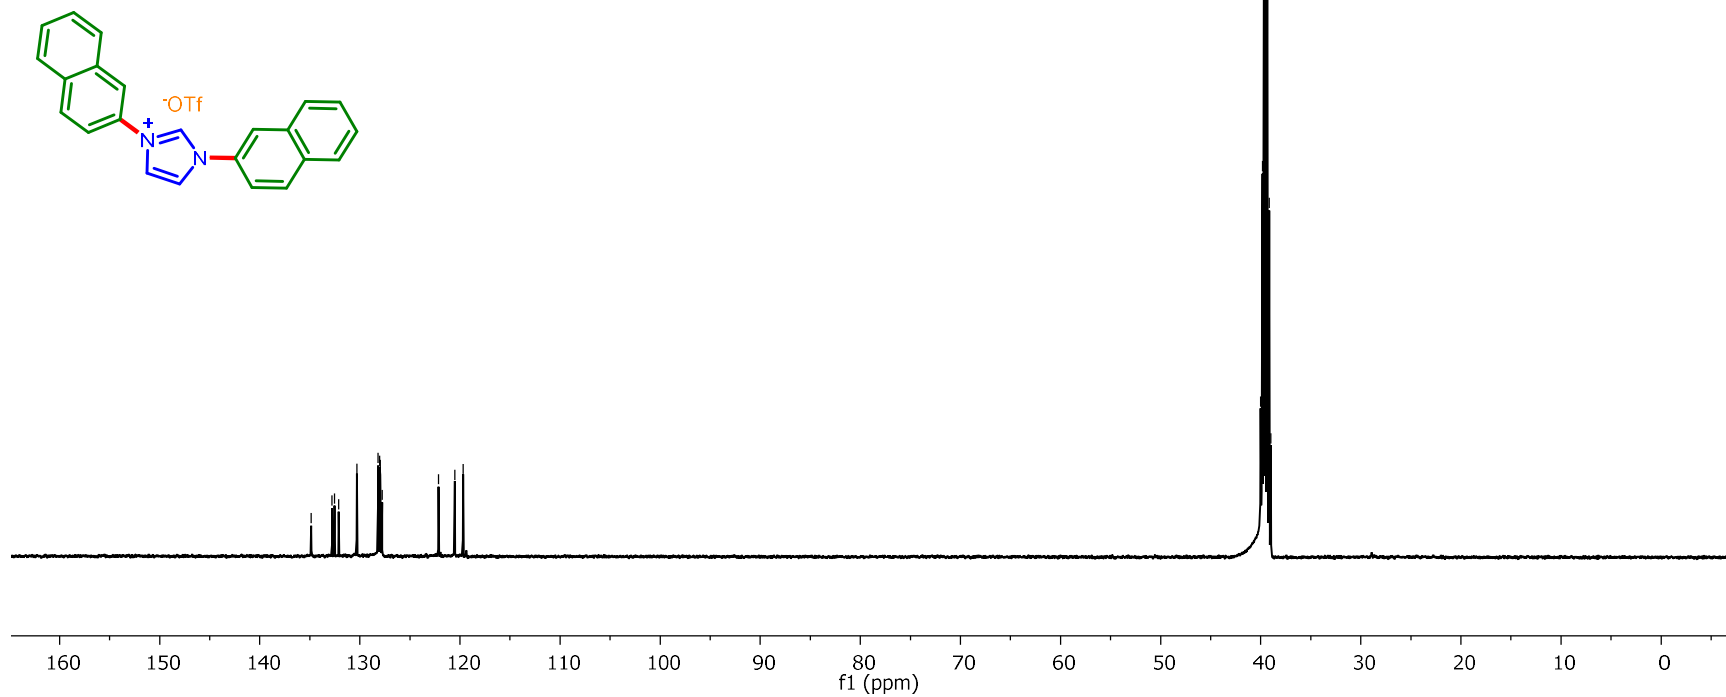

1,3-di(Naphthalen-2-yl)-1H-imidazol-3-ium trifluoromethanesulfonate (10cj):  $^{13}\text{C}\{^1\text{H}\}$  NMR (DMSO- $d_6$ , 126 MHz)

TK-NAP-19F.1.fid  
TK-NAP-19F

— -77.757

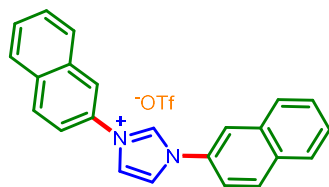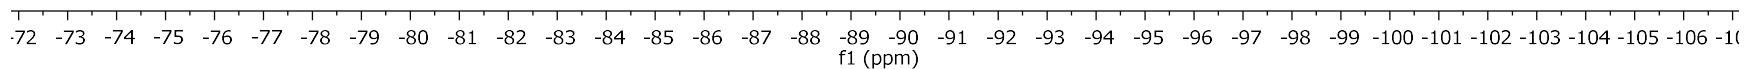

**1,3-di(Naphthalen-2-yl)-1*H*-imidazol-3-ium trifluoromethanesulfonate (10cj): <sup>19</sup>F NMR (DMSO-*d*<sub>6</sub>, 471 MHz)**

TK-40MEI-1H.1.fid  
TK-40MEI-1H

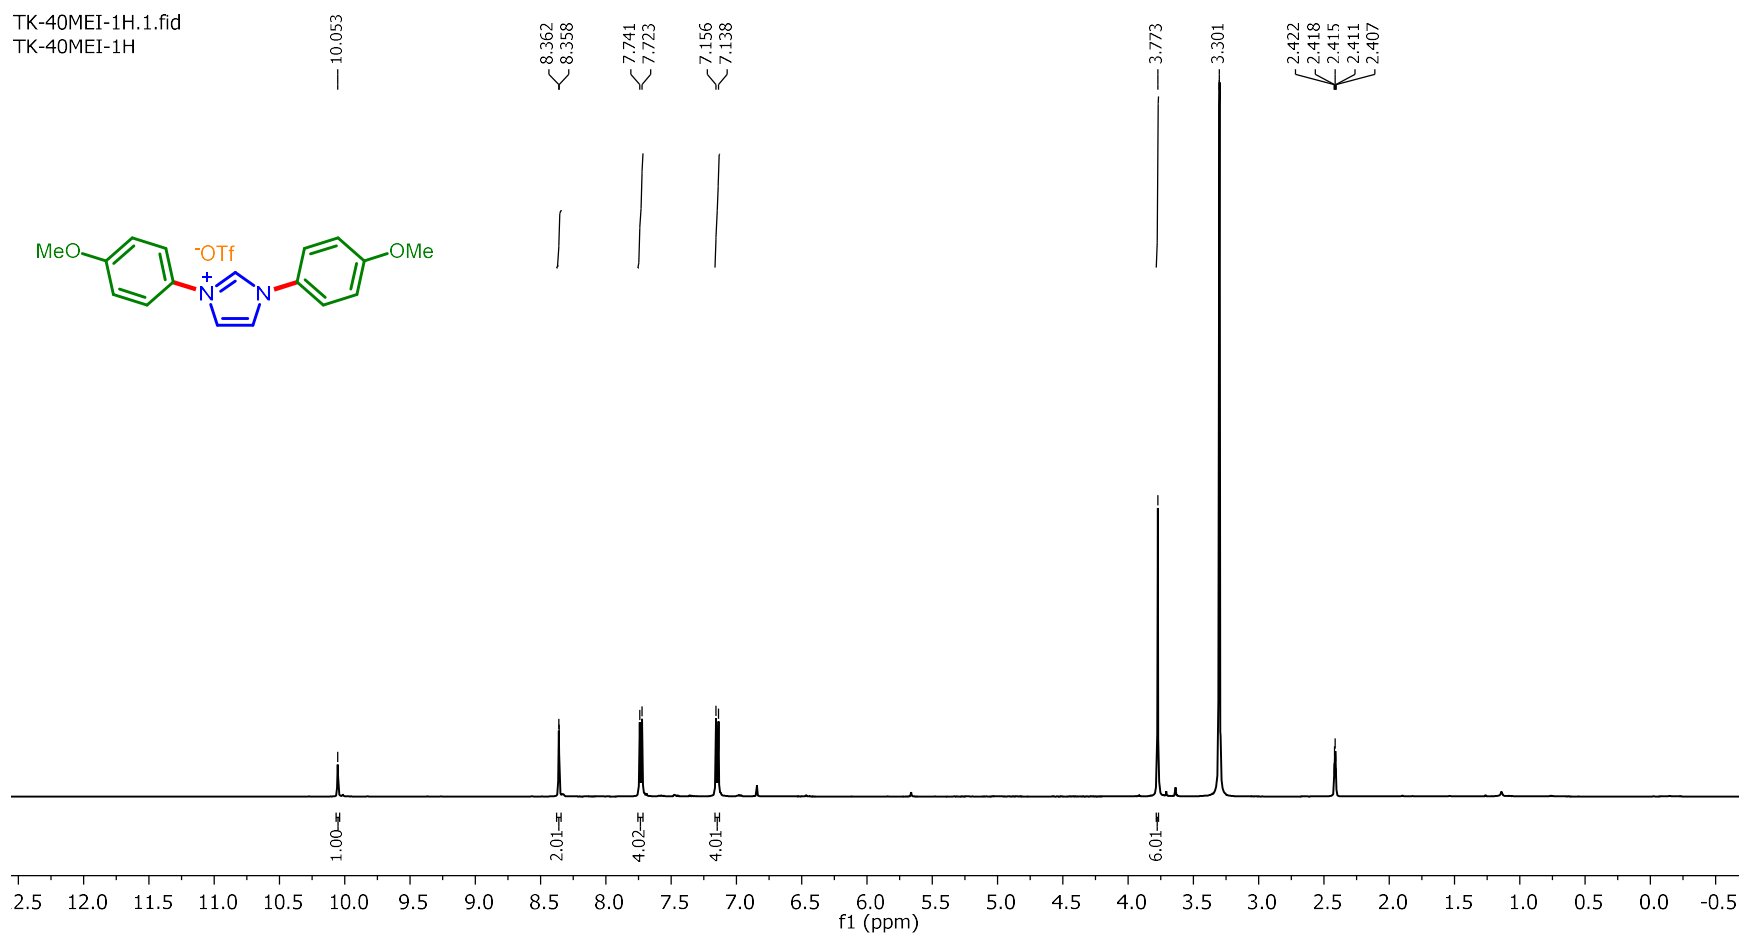

**1,3-bis(4-Methoxyphenyl)-1H-imidazol-3-ium trifluoromethanesulfonate (10cb):<sup>1</sup>H NMR (DMSO-d<sub>6</sub>, 500 MHz)**

TK-40MEI-13C.1.fid  
TK-40MEI-13C

— 160.195

— 133.917

— 127.817

— 123.648

— 121.997

— 115.165

— 55.809

— 40.001

— 39.835

— 39.668

— 39.501

— 39.334

— 39.167

— 38.999

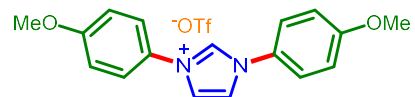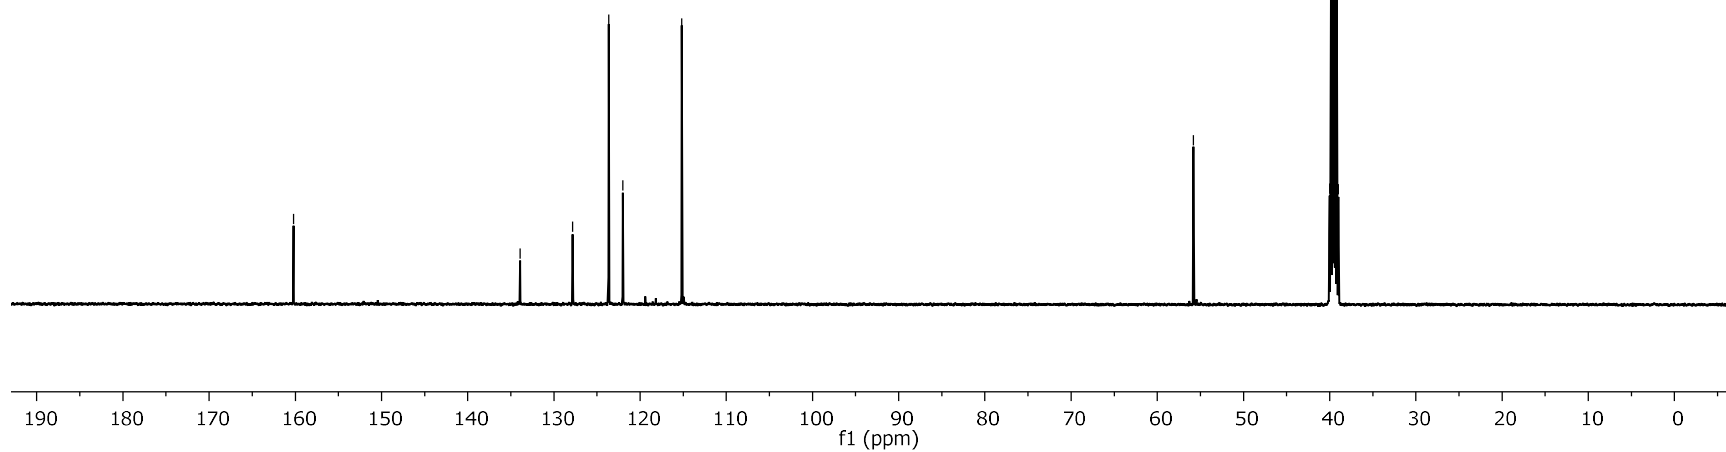

**1,3-bis(4-Methoxyphenyl)-1*H*-imidazol-3-ium trifluoromethanesulfonate (10cb):  $^{13}\text{C}\{^1\text{H}\}$  NMR (DMSO- $d_6$ , 126 MHz)**

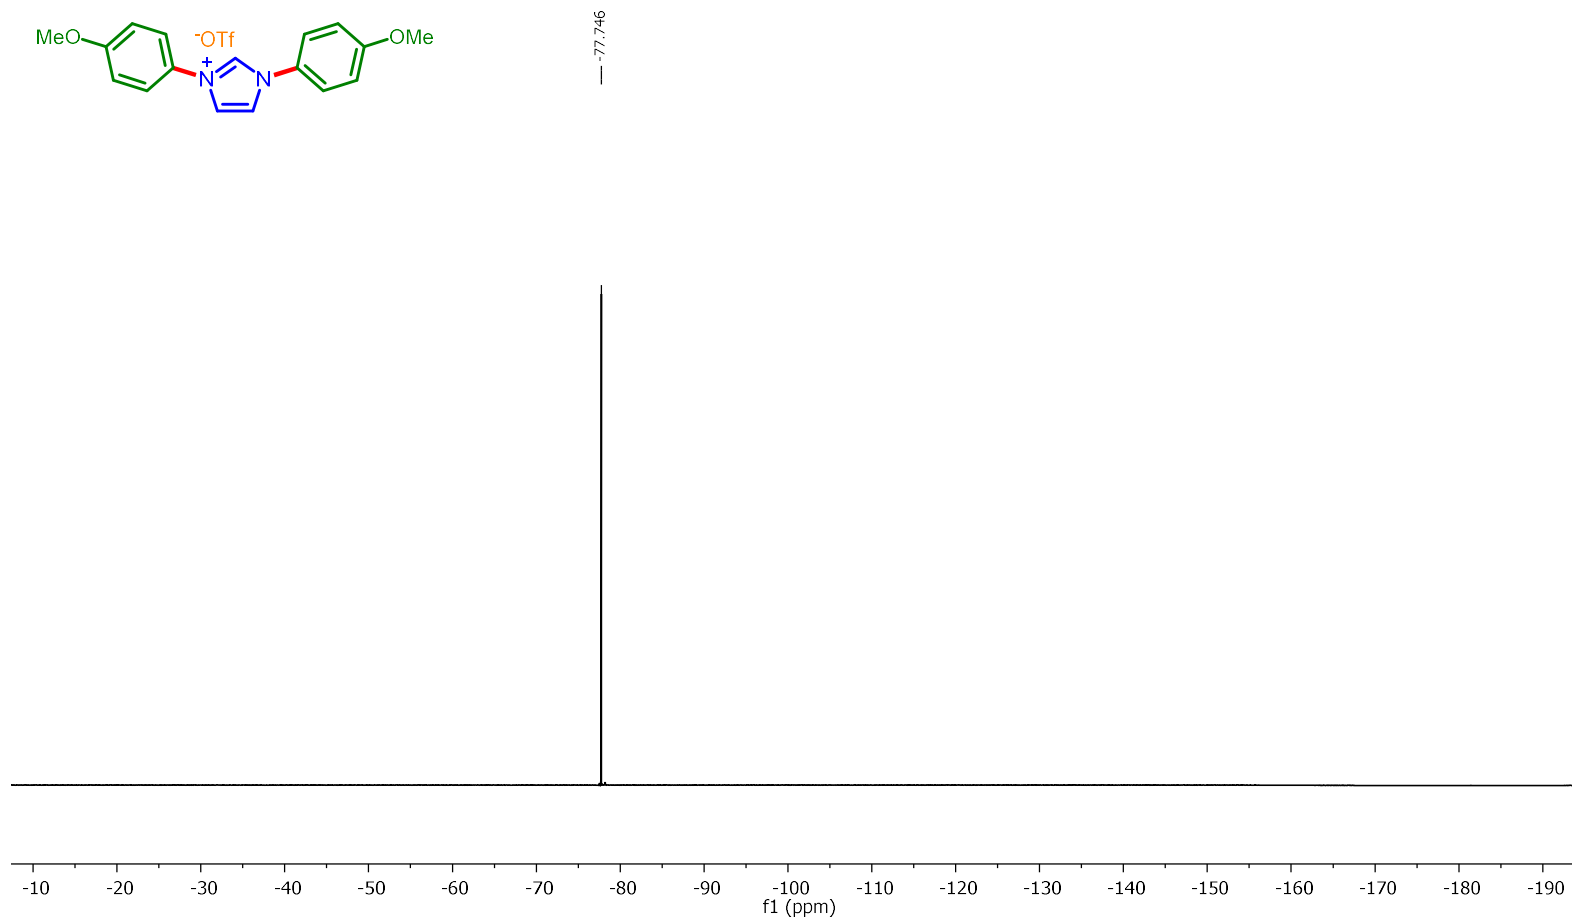

**1,3-bis(4-Methoxyphenyl)-1*H*-imidazol-3-ium trifluoromethanesulfonate (10cb):  $^{19}\text{F}$  NMR (DMSO- $d_6$ , 471 MHz)**

TK-4Cl-REP-1H.1.fid  
TK-4Cl-REP-1H

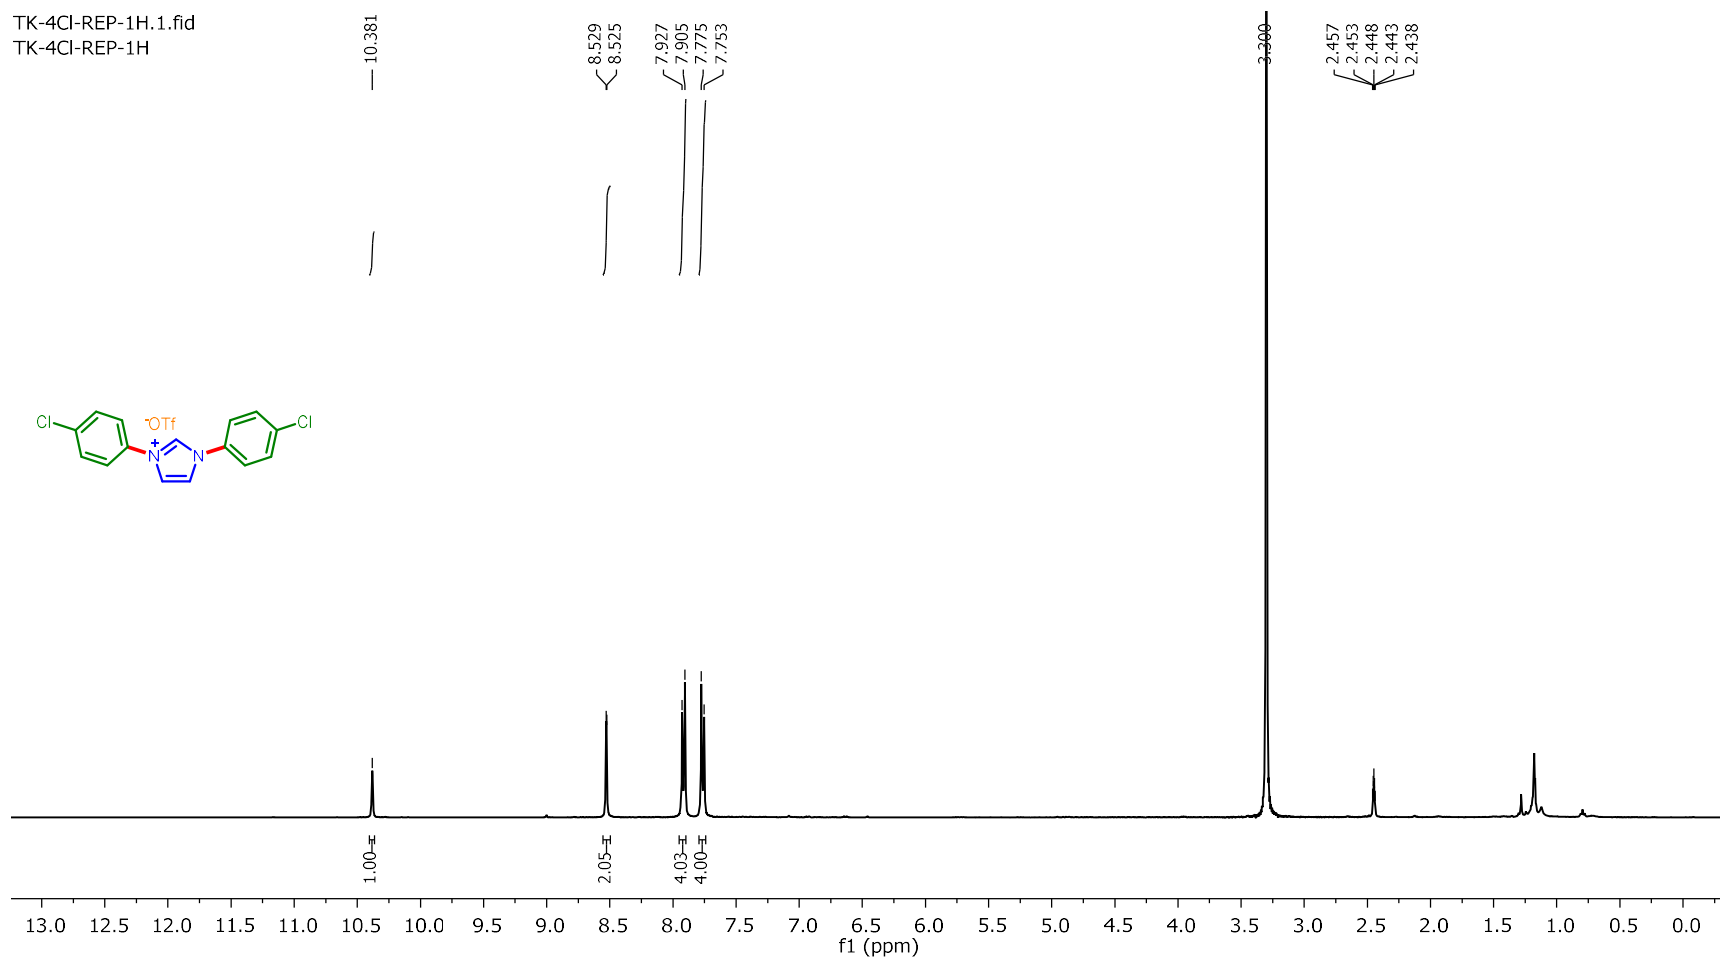

1,3-bis(4-Chlorophenyl)-1H-imidazol-3-ium trifluoromethanesulfonate (10cf):  $^1\text{H}$  NMR (DMSO- $d_6$ , 500 MHz)

PP-4CLBI-13C.11.fid  
PP-4CLBI-13C

135.097  
134.660  
133.527  
130.204  
123.952  
122.009

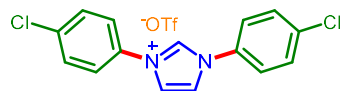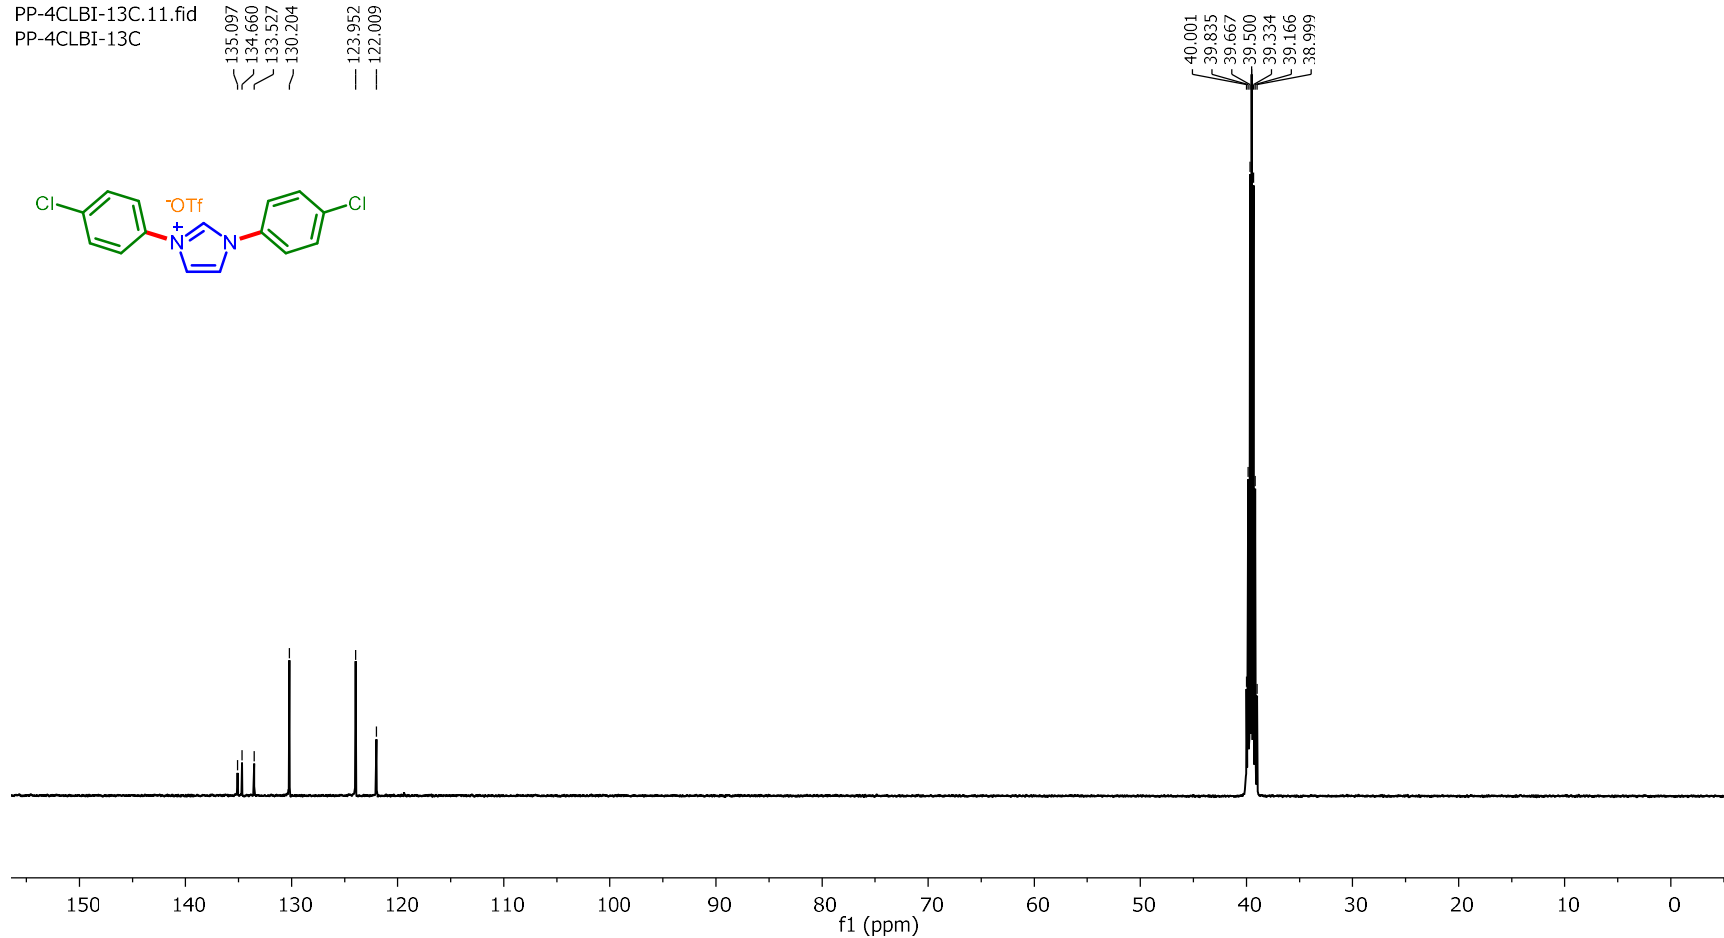

1,3-bis(4-Chlorophenyl)-1*H*-imidazol-3-ium trifluoromethanesulfonate (10cf):  $^{13}\text{C}\{^1\text{H}\}$  NMR (DMSO- $d_6$ , 126 MHz)



TK-I4CLBI-19F.5.fid  
TK-I4CLBI-19F

— -77.765

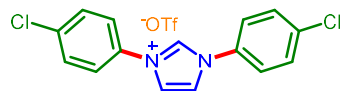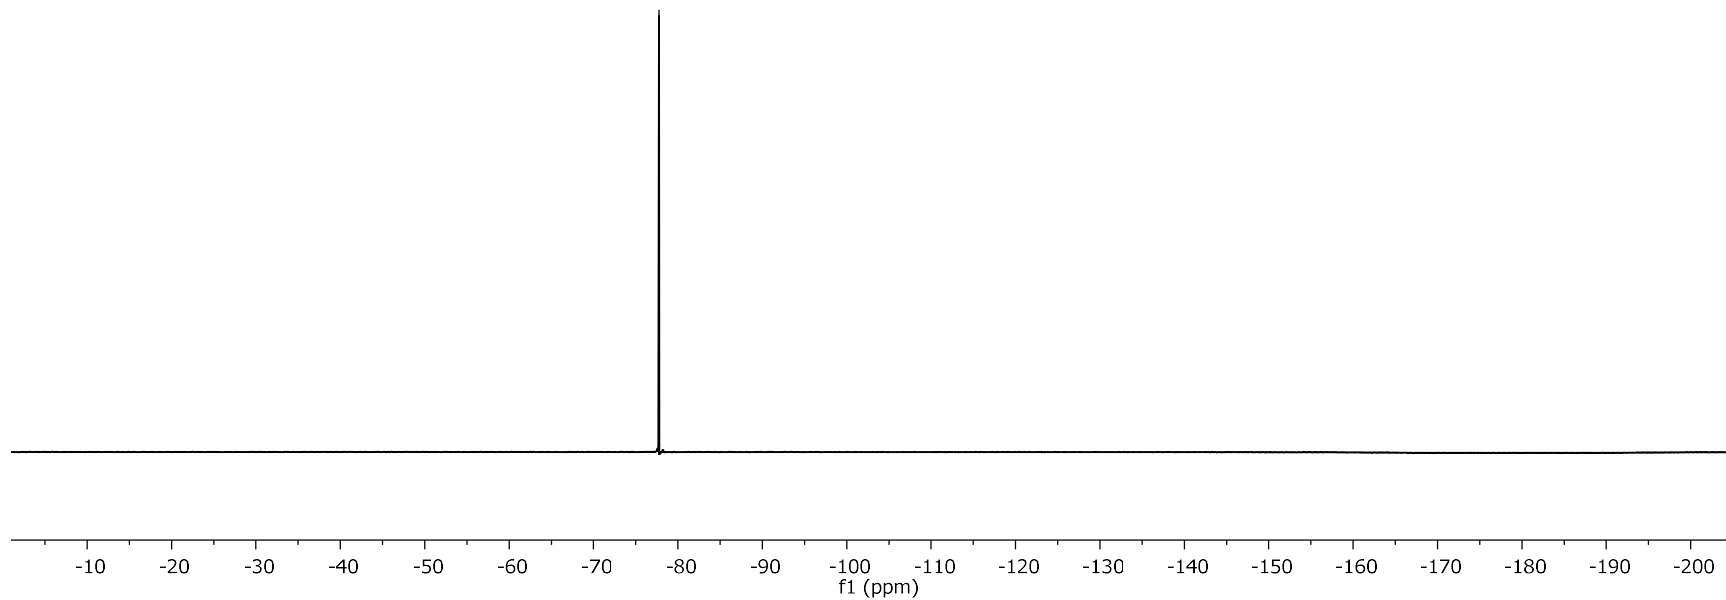

**1,3-bis(4-Chlorophenyl)-1*H*-imidazol-3-ium trifluoromethanesulfonate (10cf): <sup>19</sup>F NMR (DMSO-*d*<sub>6</sub>, 471 MHz)**

**S121**

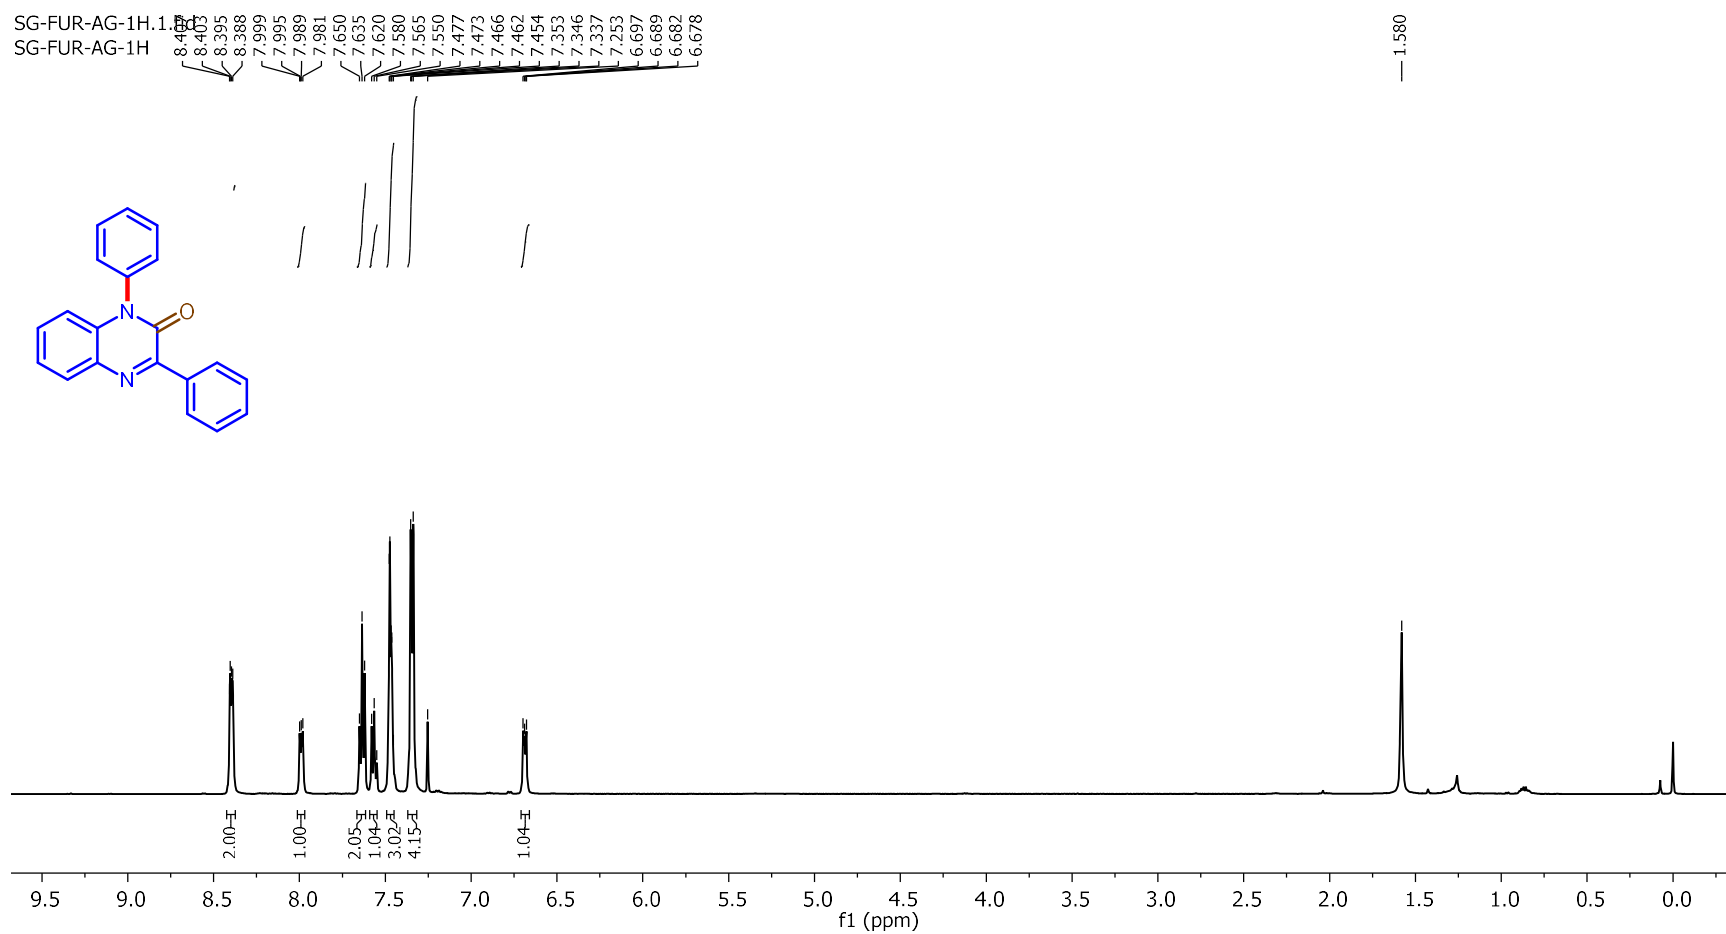

**1,3-Diphenylquinoxalin-2(1H)-one (11): <sup>1</sup>H NMR (CDCl<sub>3</sub>, 500 MHz)**

TK-FUR-AG-1H.1.fid  
TK-FUR-AG-1H

154.688  
154.670

136.317  
135.933  
134.366  
133.182  
130.635  
130.442  
130.218  
130.064  
129.860  
129.553  
128.494  
128.190  
124.038  
115.501

77.415  
77.160  
76.907

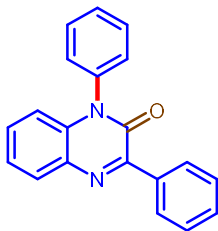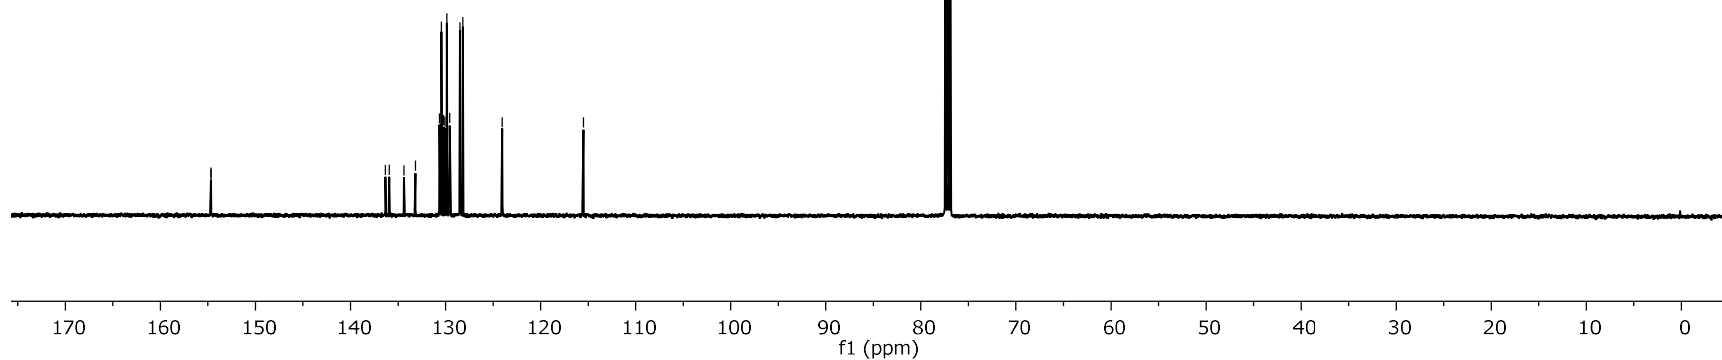

**1,3-Diphenylquinoxalin-2(1H)-one (11):  $^{13}\text{C}\{^1\text{H}\}$  NMR ( $\text{CDCl}_3$ , 126 MHz)**

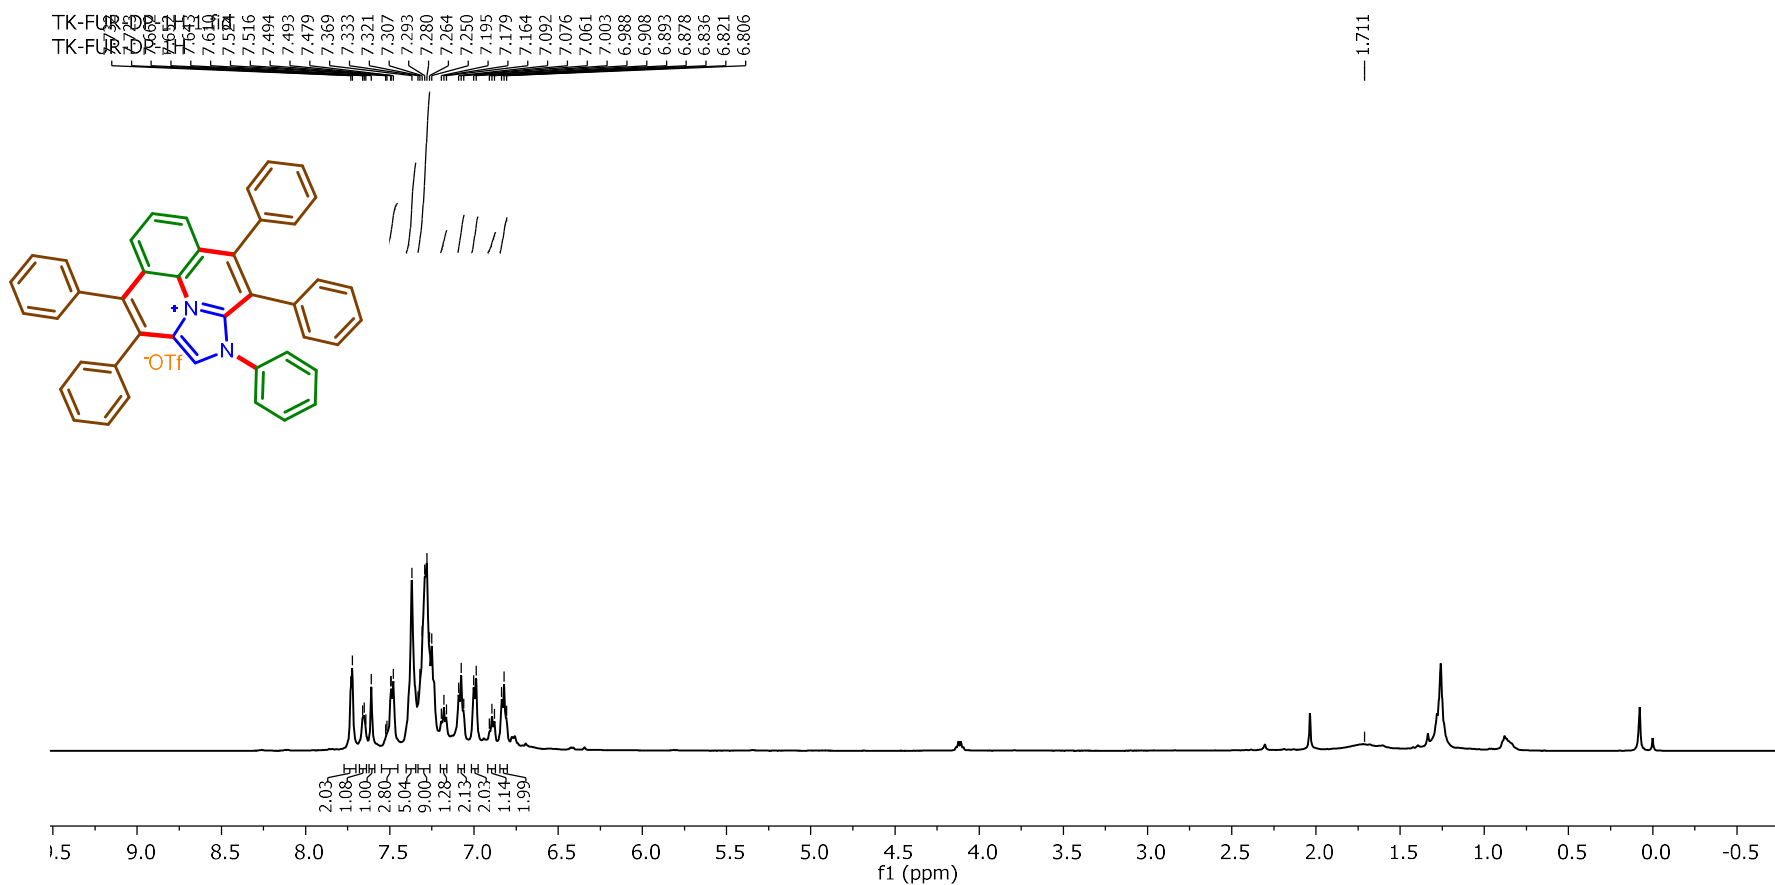

**1,3,4,8,9-Pentaphenyl-1*H*-benzo[*ij*]imidazo[2,1,5-*de*]quinolizin-10-ium trifluoromethanesulfonate (12): <sup>1</sup>H NMR (CDCl<sub>3</sub>, 500 MHz)**

TK-FUR-DP-13C.13c  
TK-FUR-DP-13C

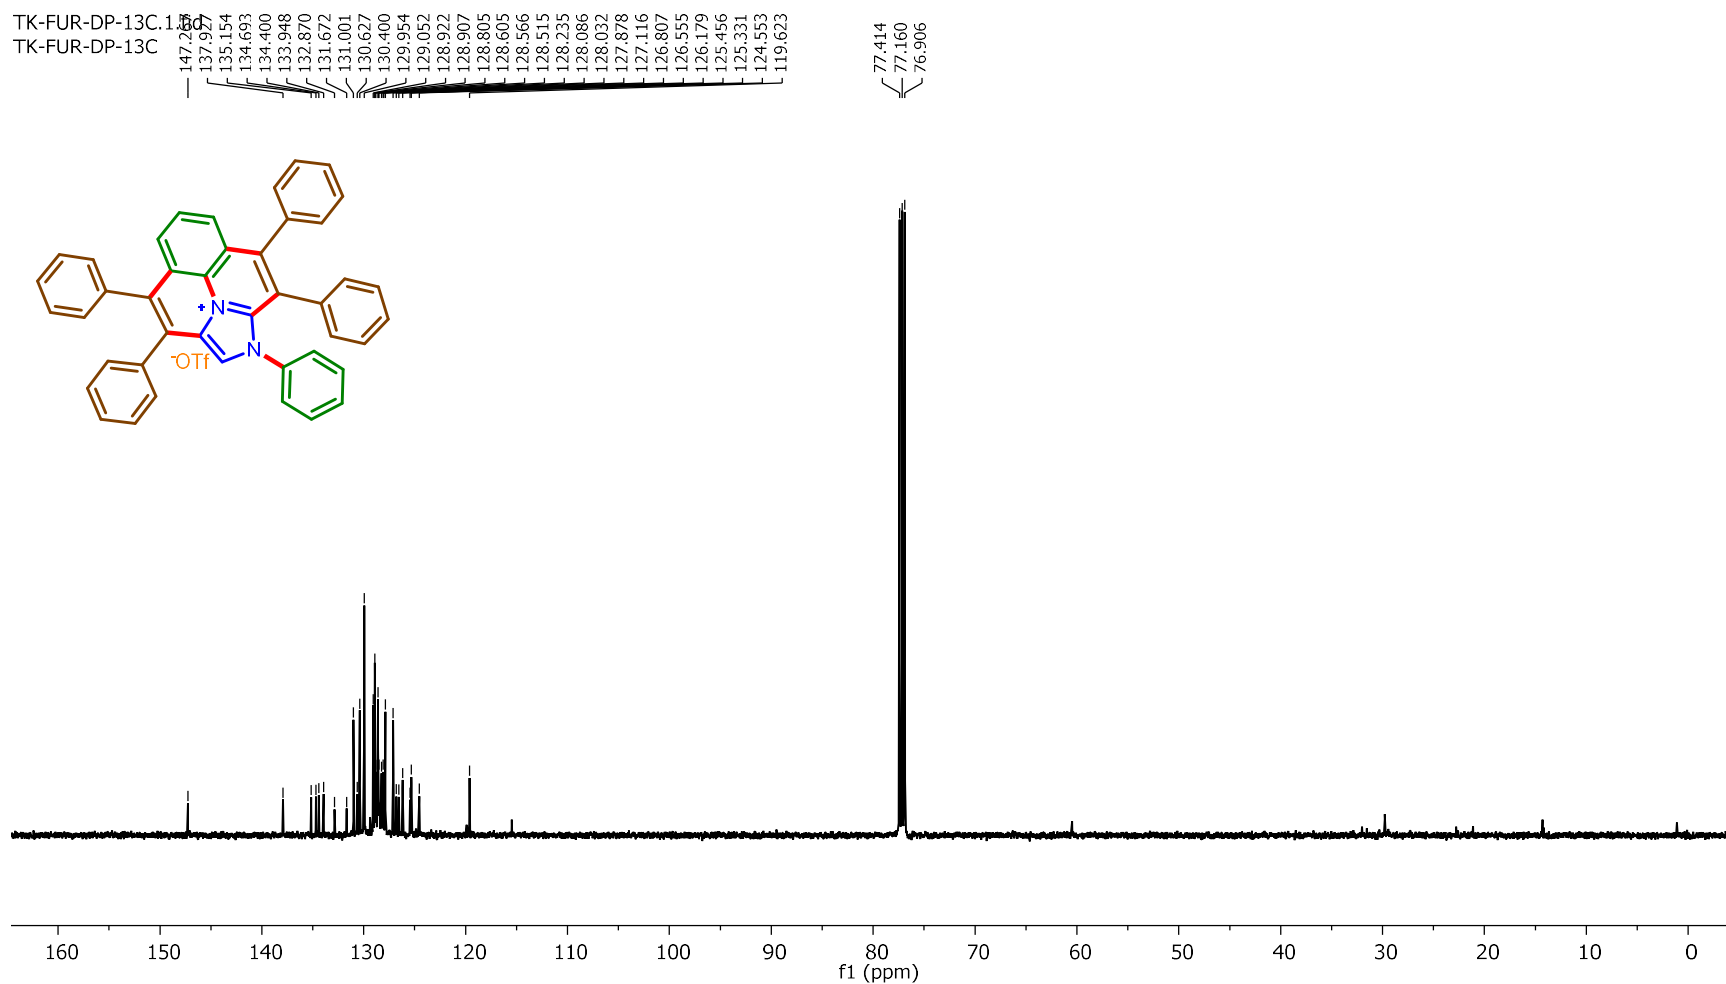

**1,3,4,8,9-Pentaphenyl-1H-benzo[*ij*]imidazo[2,1,5-*de*]quinolizin-10-ium trifluoromethanesulfonate (12): <sup>13</sup>C{<sup>1</sup>H} NMR (CDCl<sub>3</sub>, 126 MHz)**

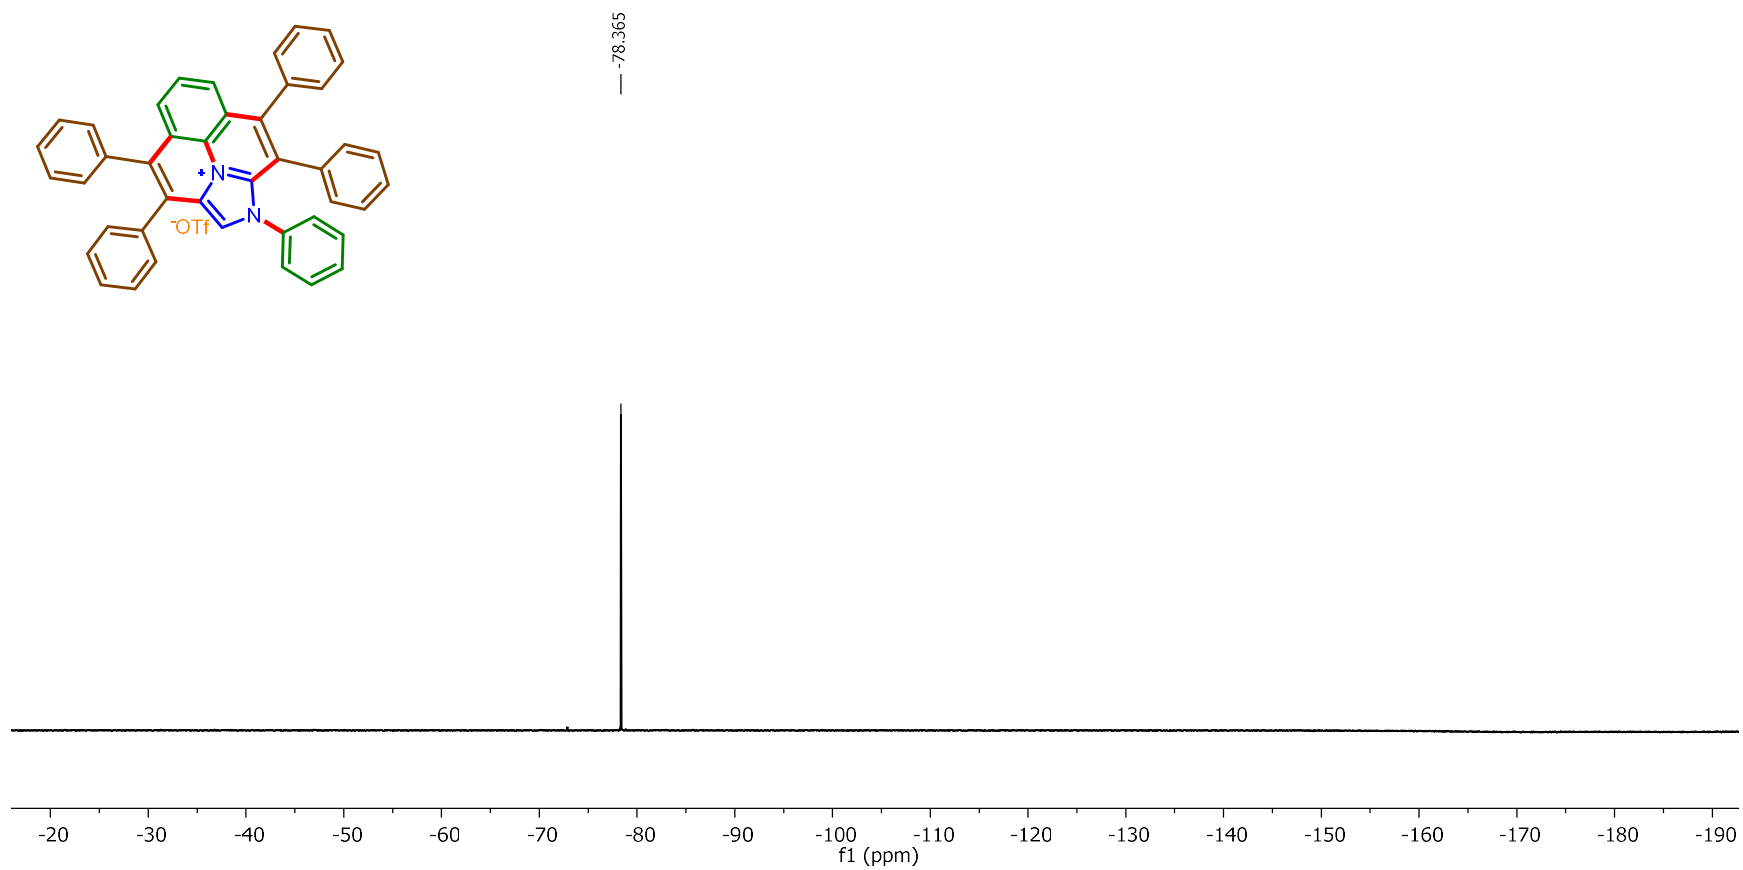

**1,3,4,8,9-Pentaphenyl-1*H*-benzo[*ij*]imidazo[2,1,5-*de*]quinolizin-10-ium trifluoromethanesulfonate (12): <sup>19</sup>F NMR (CDCl<sub>3</sub>, MHz)**
